# Supplementary material for: Stereoselective synthesis of 1,6-diazecanes by a tandem aza-Prins type dimerization and cyclization process
Source: Royal Society of Chemistry journal article supplement (doi:10.1039/d2cc05133h), 2022-11-30
Supplement: d2cc05133h1.pdf [file d2cc05133h1.pdf]

## Electronic Supplementary Information

# Stereoselective synthesis of 1,6-diazecanes by tandem aza-Prins type dimerization and cyclization process

Gyeong Un Kim,<sup>ab</sup> Hyunmi Cho,<sup>ac</sup> Jae Kyun Lee,<sup>a</sup> Jae Yeol Lee,<sup>b</sup> Jinsung Tae,<sup>c</sup> Sun-Joon Min,<sup>\*d</sup> Taek Kang<sup>\*a</sup> and Yong Seo Cho<sup>\*a</sup>

<sup>a</sup>Brain Science Institute, Korea Institute of Science and Technology (KIST), Seoul 02792, Republic of Korea

<sup>b</sup>Department of Chemistry, Kyung Hee University, Seoul 02447, Republic of Korea

<sup>c</sup>Department of Chemistry, Yonsei University, Seoul 03722, Republic of Korea

<sup>d</sup>Department of Chemical & Molecular Engineering/Applied Chemistry, Center for Bionano Intelligence Education and Research, Hanyang University, Ansan 15588, Republic of Korea

## Table of Contents

|                                                                                        |      |
|----------------------------------------------------------------------------------------|------|
| 1. Experimental Procedures .....                                                       | S2   |
| 1) General Information .....                                                           | S2   |
| 2) General Procedure for the Preparation of Substrate <b>1a–1p</b> .....               | S3   |
| 3) Experimental Procedure for the Optimization Study .....                             | S8   |
| 4) General Procedure for the Synthesis of 1,6-Diazecanes <b>3a–3f</b> .....            | S9   |
| 5) General Procedure for the Synthesis of 1,6-Diazecanes <b>3g–3o</b> .....            | S11  |
| 6) Procedure for the Synthesis of <b>4</b> .....                                       | S14  |
| 7) General Procedure for the Synthesis of <b>9a–9e</b> .....                           | S15  |
| 8) Procedure for the Reaction of <b>11</b> .....                                       | S18  |
| 9) Cross-over Experiment .....                                                         | S20  |
| 2. <sup>1</sup> H, <sup>13</sup> C, and <sup>19</sup> F NMR Spectra of Compounds ..... | S21  |
| 3. X-ray Crystallographic Data .....                                                   | S76  |
| 1) Crystallographic Data for <b>3a</b> .....                                           | S76  |
| 2) Crystallographic Data for <b>4</b> .....                                            | S86  |
| 3) Crystallographic Data for <b>14</b> .....                                           | S107 |

## 1. Experimental Procedures

### 1) General Information

All reactions were conducted using oven-dried glassware under an atmosphere of argon (Ar<sub>2</sub>). Commercially available reagents were purchased from Merck, TCI, Thermo Fisher Scientific, Combi-blocks and used without further purification. Reactions were followed by thin layer chromatography (TLC) analysis using Merck pre-coated silica gel 60 F<sub>254</sub> plates. Visualization on TLC was achieved by the use of UV light and treatment with acidic anisaldehyde or ceric ammonium molybdate, KMnO<sub>4</sub> stain followed by heating. Flash column chromatography was carried out using silica gel (60, 0.040-0.060mm). The <sup>1</sup>H NMR, <sup>13</sup>C NMR, <sup>19</sup>F NMR spectra were measured with Bruker Avance III HD (400 MHz) and Agilent Technologies DD2 (600 MHz). The <sup>1</sup>H NMR chemical shifts are expressed in parts per million (δ) downfield to CDCl<sub>3</sub> resonance (δ = 7.26), CD<sub>3</sub>OD resonance (δ = 3.31), (CD<sub>3</sub>)<sub>2</sub>CO resonance (δ = 2.05). The <sup>13</sup>C NMR chemical shifts are expressed in parts per million (δ) relative to the central CDCl<sub>3</sub> resonance (δ = 77.16), CD<sub>3</sub>OD resonance (δ = 49.00), (CD<sub>3</sub>)<sub>2</sub>CO resonance (δ = 29.84 or 206.26). The <sup>19</sup>F NMR chemical shifts are expressed in parts per million (δ). Coupling constants in <sup>1</sup>H NMR and <sup>19</sup>F NMR are in Hz. The following abbreviations were used to designate multiplicities: s = singlet, d = doublet, t = triplet, q = quartet, dd = doublet of doublet, m = multiplet, brs = broad singlet. High resolution mass spectra (HRMS) were obtained by using Bruker Compact System (ESI) or Jeol JMS-700 high resolution mass spectrometer (EI) from the Korea Basic Science Institute (Daegu).

## 2) General Procedure for the Preparation of Substrate **1a–1p**

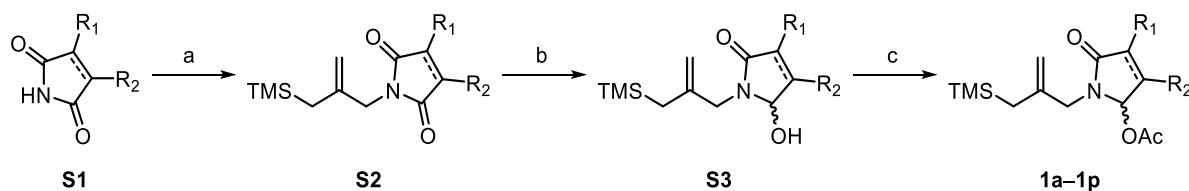

**Note 1 :** **S1** substrates were used commercially available reagent or prepared from corresponding cyclic anhydride or maleimide according to the reported procedures.<sup>1</sup>

a. DIAD (1.5 equiv) was added dropwise over 5 min to a stirred solution of  $PPh_3$  (1.5 equiv) in THF (0.10 M) at 0 °C. After 20 min, the 2-((trimethylsilyl)methyl)prop-2-en-1-ol<sup>2</sup> (1.0 equiv) was added at 0 °C. The mixture was stirred for 5 min and added the substrate **S1** (1 equiv) at 0 °C. The resulting mixture was allowed to warm to room temperature and stirred for overnight. The THF solvent was removed under reduced pressure. The resulting residue was purified by flash column chromatography on silica gel to obtain product **S2** in 50–85% yields.

**Note 2 :** **S2** substrate of **1p** was prepared according to the reported procedure.<sup>3</sup>

b.  $NaBH_4$  (1.5 equiv) was portionwisely added to a stirred solution of **S2** (1 equiv) in  $CH_3OH$  (0.10 M) at 0 °C. The reaction mixture was stirred for 1 h at 0 °C. The  $CH_3OH$  solvent was removed under reduced pressure. The reaction mixture was diluted with EtOAc and quenched with water. The aqueous layer was extracted with EtOAc. The combined organic layers were dried over anhydrous  $Na_2SO_4$ , filtered, and evaporated under reduced pressure. The resulting residue was used without further purification.

**Note 3 :** **S3** substrates of **1h**, **1i**, **1l** and **1p** were prepared according to the reported procedure.<sup>4</sup>

c. Acetic anhydride (1.2 equiv) was added to a solution of **S3** (1 equiv) in  $CH_2Cl_2$  (0.10 M) at room temperature. Then, TEA (1.2 equiv) was added, followed by DMAP (0.1 equiv). The reaction mixture was stirred for 1 h at room temperature. The reaction mixture was quenched with saturated aqueous  $NaHCO_3$  solution and diluted with  $CH_2Cl_2$ . The aqueous layer was extracted with  $CH_2Cl_2$ . The combined organic layers were washed with brine, dried over anhydrous  $Na_2SO_4$ , filtered, and evaporated under reduced pressure. The resulting residue was purified by flash column chromatography on silica gel to obtain **1a–1p** in 64–96% yields.

1. (a) G. B. Gill, G. D. James, K. V. Oates and G. Pattenden, *J. Chem. Soc. Perkin Trans I*, 1993, 2567–2579; (b) K. I. Booker-Milburn, J. R. Baker and I. Bruce, *Org. Lett.*, 2004, **6**, 1481–1484.

2. B. M. Trost, D. M. T. Chan and T. N. Nanninga, *Org. Synth.* 1984, **62**, 58.

3. M. A. Walker, *J. Org. Chem.*, 1995, **60**, 5352–5355.

4. N. Mase, T. Nishi, M. Hiyoshi, K. Ichihara, J. Bessho, H. Yoda and K. Takabe, *J. Chem. Soc. Perkin Trans I*, 2002, 707–709.

### 3-oxo-2-(2-((trimethylsilyl)methyl)allyl)isoindolin-1-yl acetate, 1a

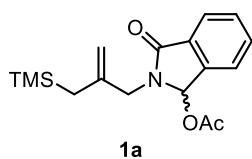

colorless oil;  $^1\text{H NMR}$  (400 MHz,  $\text{CDCl}_3$ ):  $\delta$  7.84 (dt,  $J = 5.9, 1.6$  Hz, 1H), 7.58–7.53 (m, 3H), 6.97 (s, 1H), 4.69 (d,  $J = 3.2$  Hz, 2H), 4.30 (d,  $J = 15.7$  Hz, 1H), 3.75 (d,  $J = 15.7$  Hz, 1H), 2.12 (s, 3H), 1.54 (d,  $J = 13.6$  Hz, 1H), 1.46 (d,  $J = 13.6$  Hz, 1H), 0.08 (s, 9H);  $^{13}\text{C NMR}$  (100 MHz,  $\text{CDCl}_3$ ):  $\delta$  171.1, 167.9, 142.1, 141.3, 132.6, 132.0, 130.4, 124.2, 123.9, 109.7, 81.3, 46.7, 24.1, 21.1, -1.3; **HRMS** (ESI) ( $m/z$ ):  $[\text{M}+\text{Na}]^+$  calcd for  $\text{C}_{17}\text{H}_{23}\text{NNaO}_3\text{Si}$  340.1339, Found 340.1342.

### 6-methoxy-3-oxo-2-(2-((trimethylsilyl)methyl)allyl)isoindolin-1-yl acetate, 1b

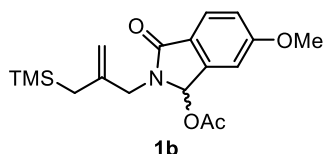

colorless oil;  $^1\text{H NMR}$  (600 MHz,  $\text{CDCl}_3$ ):  $\delta$  7.73 (d,  $J = 8.2$  Hz, 1H), 7.03 (d,  $J = 8.5$  Hz, 2H), 6.90 (s, 1H), 4.67 (d,  $J = 7.0$  Hz, 2H), 4.26 (d,  $J = 15.8$  Hz, 1H), 3.86 (s, 3H), 3.71 (d,  $J = 15.8$  Hz, 1H), 2.12 (s, 3H), 1.52 (d,  $J = 13.6$  Hz, 1H), 1.44 (d,  $J = 13.6$  Hz, 1H), 0.06 (s, 9H);  $^{13}\text{C NMR}$  (150 MHz,  $\text{CDCl}_3$ ):  $\delta$  171.1, 167.8, 163.6, 143.5, 142.2, 125.2, 124.2, 116.6, 109.5, 109.2, 81.1, 55.9, 46.7, 24.0, 21.1, -1.4; **HRMS** (ESI) ( $m/z$ ):  $[\text{M}+\text{H}]^+$  calcd for  $\text{C}_{18}\text{H}_{26}\text{NO}_4\text{Si}$  348.1631, Found 348.1638.

### 7-methyl-3-oxo-2-(2-((trimethylsilyl)methyl)allyl)isoindolin-1-yl acetate, 1c

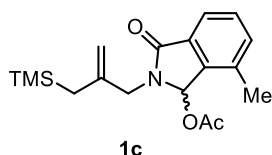

colorless oil;  $^1\text{H NMR}$  (400 MHz,  $\text{CDCl}_3$ ):  $\delta$  7.67 (d,  $J = 7.5$  Hz, 1H), 7.44 (t,  $J = 7.5$  Hz, 1H), 7.35 (d,  $J = 7.6$  Hz, 1H), 7.17 (s, 1H), 4.68 (d,  $J = 7.9$ , 2H), 4.15 (d,  $J = 15.9$  Hz, 1H), 3.84 (d,  $J = 15.9$  Hz, 1H), 2.30 (s, 3H), 2.11 (s, 3H), 1.54 (d,  $J = 13.7$  Hz, 1H), 1.48 (d,  $J = 13.7$  Hz, 1H), 0.08 (s, 9H);  $^{13}\text{C NMR}$  (100 MHz,  $\text{CDCl}_3$ ):  $\delta$  170.6, 168.3, 142.3, 139.0, 134.0, 132.1, 130.5, 121.5, 109.4, 80.0, 47.2, 24.1, 20.8, 17.5, -1.3; **HRMS** (EI) ( $m/z$ ):  $[\text{M}]^+$  calcd for  $\text{C}_{18}\text{H}_{25}\text{NO}_3\text{Si}$  331.1604, Found 331.1606

### 7-fluoro-3-oxo-2-(2-((trimethylsilyl)methyl)allyl)isoindolin-1-yl acetate, 1d

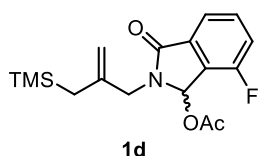

colorless oil;  $^1\text{H NMR}$  (400 MHz,  $\text{CDCl}_3$ ):  $\delta$  7.64 (d,  $J = 7.3$  Hz, 1H), 7.57–7.51 (m, 1H), 7.26–7.21 (m, 2H), 4.68 (s, 2H), 4.17 (d,  $J = 15.8$  Hz, 1H), 3.82 (d,  $J = 15.9$  Hz, 1H), 2.11 (s, 3H), 1.53 (d,  $J = 13.9$  Hz, 1H), 1.46 (d,  $J = 13.8$  Hz, 1H), 0.07 (s, 9H);  $^{13}\text{C NMR}$  (100 MHz,  $\text{CDCl}_3$ ):  $\delta$  170.0, 166.8 (d,  $J_{\text{C-F}} = 2.5$  Hz), 157.6 (d,  $J_{\text{C-F}} = 255.1$  Hz), 141.9, 134.8 (d,  $J_{\text{C-F}} = 3.3$  Hz), 132.8 (d,  $J_{\text{C-F}} = 6.6$  Hz), 126.8 (d,  $J_{\text{C-F}} = 16.3$  Hz), 119.9, 119.8 (d,  $J_{\text{C-F}} = 23.2$  Hz), 109.6, 78.0, 47.2, 24.1, 20.8, -1.4;  $^{19}\text{F NMR}$  (375 MHz,  $\text{CDCl}_3$ ):  $\delta$  -119.34 (dd,  $J_{\text{F-H}} = 8.8$ ,  $J_{\text{F-H}} = 4.5$  Hz); **HRMS** (ESI) ( $m/z$ ):  $[\text{M}+\text{Na}]^+$  calcd for  $\text{C}_{17}\text{H}_{22}\text{FNNaO}_3\text{Si}$  358.1245, Found 358.1245.

### 7-chloro-3-oxo-2-(2-((trimethylsilyl)methyl)allyl)isoindolin-1-yl acetate, 1e

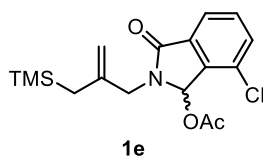

colorless oil;  $^1\text{H NMR}$  (400 MHz,  $\text{CDCl}_3$ )  $\delta$  7.75 (dd,  $J = 6.6, 1.8$  Hz, 1H), 7.55–7.49 (m, 2H), 7.21 (s, 1H), 4.71–4.68 (m, 2H), 4.15 (d,  $J = 15.9$  Hz, 1H), 3.84 (d,  $J = 15.9$  Hz, 1H), 2.13 (s, 3H), 1.53 (d,  $J = 13.6$  Hz, 1H), 1.48 (d,  $J = 13.7$  Hz, 1H), 0.08 (s, 9H);  $^{13}\text{C NMR}$  (100 MHz,

CDCl<sub>3</sub>):  $\delta$  170.2, 166.9, 141.9, 138.3, 134.3, 133.0, 132.0, 130.0, 122.4, 109.6, 79.1, 47.3, 24.1, 20.7, -1.3; **HRMS** (ESI) (m/z): [M]<sup>+</sup> calcd for C<sub>17</sub>H<sub>22</sub>ClNO<sub>3</sub>Si 351.1057, Found 351.1056.

### 7-nitro-3-oxo-2-(2-((trimethylsilyl)methyl)allyl)isoindolin-1-yl acetate, **1f**

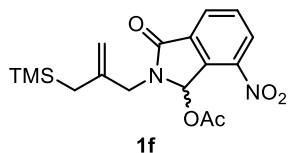

yellow solid; **<sup>1</sup>H NMR** (400 MHz, CDCl<sub>3</sub>):  $\delta$  8.40 (dd, *J* = 8.2, 1.0 Hz, 1H), 8.17 (dd, *J* = 7.5, 1.0 Hz, 1H), 7.80 (t, *J* = 7.8 Hz, 1H), 7.61 (s, 1H), 4.70 (dd, *J* = 5.7, 1.2 Hz, 2H), 4.17 (d, *J* = 16.0 Hz, 1H), 3.92 (d, *J* = 16.1 Hz, 1H), 1.52 (s, 2H), 0.09 (s, 9H); **<sup>13</sup>C NMR** (100 MHz, CDCl<sub>3</sub>):  $\delta$  169.9, 165.4, 143.6, 141.7, 135.9, 135.3, 132.1, 129.7,

127.8, 109.2, 79.8, 47.6, 24.3, 20.5, -1.3; **HRMS** (EI) (m/z): [M]<sup>+</sup> calcd for C<sub>17</sub>H<sub>22</sub>N<sub>2</sub>O<sub>5</sub>Si 362.1298, Found 362.1301.

### 3,4-dimethyl-5-oxo-1-(2-((trimethylsilyl)methyl)allyl)-2,5-dihydro-1H-pyrrol-2-yl acetate, **1g**

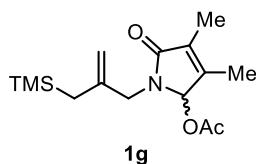

colorless oil; **<sup>1</sup>H NMR** (400 MHz, CDCl<sub>3</sub>):  $\delta$  6.40 (s, 1H), 4.61 (dd, *J* = 8.6, 1.4 Hz, 2H), 3.96 (d, *J* = 15.9 Hz, 1H), 3.70 (d, *J* = 15.9 Hz, 1H), 2.10 (s, 3H), 1.87 (s, 3H), 1.84 (s, 3H), 1.49 (d, *J* = 13.6 Hz, 1H), 1.42 (d, *J* = 13.6 Hz, 1H), 0.05 (s, 9H); **<sup>13</sup>C NMR** (100 MHz, CDCl<sub>3</sub>):  $\delta$  171.6,

170.8, 145.4, 142.8, 131.1, 108.9, 83.2, 47.1, 24.0, 21.0, 11.5, 8.7, -1.3; **HRMS** (ESI) (m/z): [M+Na]<sup>+</sup> calcd for C<sub>15</sub>H<sub>25</sub>NNaO<sub>3</sub>Si 318.1496, Found 318.1495.

### 3-methyl-5-oxo-1-(2-((trimethylsilyl)methyl)allyl)-2,5-dihydro-1H-pyrrol-2-yl acetate, **1h**

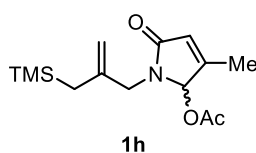

colorless oil; **<sup>1</sup>H NMR** (400 MHz, CDCl<sub>3</sub>):  $\delta$  6.45 (s, 1H), 5.90 (d, *J* = 1.7 Hz, 1H), 4.60 (dd, *J* = 9.4, 1.3 Hz, 2H), 3.94 (d, *J* = 15.9 Hz, 1H), 3.65 (d, *J* = 15.9 Hz, 1H), 2.10 (s, 3H), 1.95 (d, *J* = 1.7 Hz, 3H), 1.47 (d, *J* = 13.7, 1H), 1.40 (d, *J* = 13.7, 1H), 0.03 (s, 9H); **<sup>13</sup>C NMR** (100 MHz,

CDCl<sub>3</sub>):  $\delta$  170.5 (2C), 154.7, 142.6, 124.3, 109.0, 83.7, 46.8, 24.0, 20.9, 13.8, -1.4; **HRMS** (ESI) (m/z): [M+Na]<sup>+</sup> calcd for C<sub>14</sub>H<sub>23</sub>NNaO<sub>3</sub>Si 304.1339, Found 304.1339.

### 4-methyl-5-oxo-1-(2-((trimethylsilyl)methyl)allyl)-2,5-dihydro-1H-pyrrol-2-yl acetate, **1i**

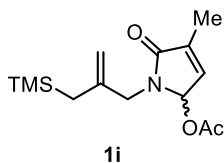

colorless oil; **<sup>1</sup>H NMR** (400 MHz, CDCl<sub>3</sub>):  $\delta$  6.60 (t, *J* = 1.8 Hz, 1H), 6.36 (t, *J* = 1.6 Hz, 1H), 4.62 (dd, *J* = 18.7, 1.4 Hz, 2H), 4.07 (d, *J* = 16.0 Hz, 1H), 3.63 (d, *J* = 16.0 Hz, 1H), 2.08 (s, 3H), 1.94 (t, *J* = 1.5 Hz, 3H), 1.49 (d, *J* = 12.7 Hz, 1H), 1.42 (d, *J* = 12.7 Hz, 1H), 0.06 (s, 9H); **<sup>13</sup>C NMR** (100

MHz, CDCl<sub>3</sub>)  $\delta$  170.8, 170.6, 142.4, 138.4, 135.0, 109.1, 81.7, 46.8, 24.1, 21.0, 11.1, -1.4; **HRMS** (ESI) (m/z): [M+Na]<sup>+</sup> calcd for C<sub>14</sub>H<sub>23</sub>NNaO<sub>3</sub>Si 304.1339, Found 304.1339.

**3-oxo-2-(2-((trimethylsilyl)methyl)allyl)-2,3,4,5,6,7-hexahydro-1H-isoindol-1-yl acetate, 1j**

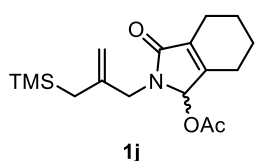

colorless oil;  $^1\text{H NMR}$  (400 MHz,  $\text{CDCl}_3$ ):  $\delta$  6.41 (s, 1H), 4.61 (dd,  $J = 4.8, 1.6$  Hz, 2H), 3.97 (d,  $J = 16.0$  Hz, 1H), 3.67 (d,  $J = 16.0$  Hz, 1H), 2.26–2.20 (m, 2H), 2.19–2.14 (m, 2H), 2.09 (s, 3H), 1.77–1.66 (m, 4H), 1.49 (d,  $J = 13.6$  Hz, 1H), 1.41 (d,  $J = 13.3$  Hz, 1H), 0.04 (s, 9H);  $^{13}\text{C NMR}$  (100 MHz,  $\text{CDCl}_3$ ):  $\delta$  170.9, 170.7, 149.9, 142.9, 134.5, 108.9, 82.6, 46.8, 24.0, 22.6, 22.0, 21.7, 20.9, 20.2, -1.4; **HRMS** (ESI) (m/z):  $[\text{M}+\text{Na}]^+$  calcd for  $\text{C}_{17}\text{H}_{27}\text{NNaO}_3\text{Si}$  344.1652, Found 344.1655.

**3-methoxy-5-oxo-1-(2-((trimethylsilyl)methyl)allyl)-2,5-dihydro-1H-pyrrol-2-yl acetate, 1k**

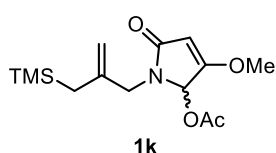

colorless oil;  $^1\text{H NMR}$  (400 MHz,  $\text{CDCl}_3$ ):  $\delta$  6.48 (s, 1H), 5.10 (s, 1H), 4.63 (dt,  $J = 2.8, 1.3$  Hz, 2H), 3.95 (d,  $J = 16.0$  Hz, 1H), 3.82 (s, 3H), 3.63 (d,  $J = 16.0$  Hz, 1H), 1.49 (d,  $J = 13.7$  Hz, 1H), 1.42 (d,  $J = 13.7$  Hz, 1H), 0.04 (s, 9H);  $^{13}\text{C NMR}$  (100 MHz,  $\text{CDCl}_3$ ):  $\delta$  171.4, 170.6, 170.3, 142.7, 109.1, 94.6, 79.6, 58.7, 46.4, 24.0, 20.9, -1.3; **HRMS** (ESI) (m/z):  $[\text{M}+\text{Na}]^+$  calcd for  $\text{C}_{14}\text{H}_{23}\text{NNaO}_4\text{Si}$  320.1288, Found 320.1289.

**5-oxo-4-phenyl-1-(2-((trimethylsilyl)methyl)allyl)-2,5-dihydro-1H-pyrrol-2-yl acetate, 1l**

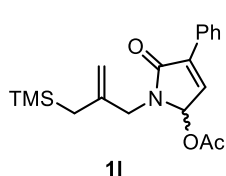

colorless oil;  $^1\text{H NMR}$  (400 MHz,  $\text{CDCl}_3$ ):  $\delta$  7.88 (d,  $J = 6.9$  Hz, 2H), 7.43–7.31 (m, 3H), 7.08 (s, 1H), 6.49 (s, 1H), 4.66 (d,  $J = 3.7$  Hz, 2H), 4.17 (d,  $J = 15.8$  Hz, 1H), 3.71 (d,  $J = 15.9$  Hz, 1H), 2.10 (s, 3H), 1.52 (d,  $J = 13.6$  Hz, 1H), 1.45 (d,  $J = 13.6$  Hz, 1H), 0.07 (s, 9H);  $^{13}\text{C NMR}$  (100 MHz,  $\text{CDCl}_3$ ):  $\delta$  170.5, 168.9, 142.1, 138.8, 133.9, 130.4, 129.5, 128.6, 127.5, 109.2, 81.0, 46.7, 24.0, 20.9, -1.4; **HRMS** (EI) (m/z):  $[\text{M}]^+$  calcd for  $\text{C}_{19}\text{H}_{25}\text{NO}_3\text{Si}$  343.1604, Found 343.1606.

**4-bromo-3-methoxy-5-oxo-1-(2-((trimethylsilyl)methyl)allyl)-2,5-dihydro-1H-pyrrol-2-yl acetate, 1m**

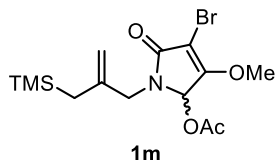

colorless oil;  $^1\text{H NMR}$  (400 MHz,  $\text{CDCl}_3$ ):  $\delta$  6.47 (s, 1H), 4.63 (s, 2H), 4.20 (s, 3H), 3.94 (d,  $J = 15.8$  Hz, 1H), 3.69 (d,  $J = 15.8$  Hz, 1H), 2.10 (s, 3H), 1.48 (d,  $J = 13.7$  Hz, 1H), 1.40 (d,  $J = 13.4$  Hz, 1H), 0.04 (s, 9H);  $^{13}\text{C NMR}$  (100 MHz,  $\text{CDCl}_3$ )  $\delta$  170.0, 166.7, 163.7, 142.2, 109.7, 87.1, 79.4, 59.5, 47.6, 23.9, 20.8, -1.4; **HRMS** (EI) (m/z):  $[\text{M}]^+$  calcd for  $\text{C}_{14}\text{H}_{22}\text{BrNO}_4\text{Si}$  375.0501, Found 375.0502.

**3,4-dibromo-5-oxo-1-(2-((trimethylsilyl)methyl)allyl)-2,5-dihydro-1H-pyrrol-2-yl acetate, 1n**

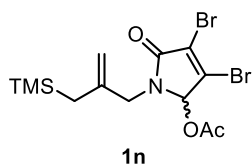

pale yellow oil;  $^1\text{H NMR}$  (400 MHz,  $\text{CDCl}_3$ ):  $\delta$  6.60 (s, 1H), 4.66 (d,  $J = 8.4$  Hz, 2H), 4.01 (d,  $J = 15.7$  Hz, 1H), 3.77 (d,  $J = 15.7$  Hz, 1H), 2.14 (s, 3H), 1.48 (d,  $J = 13.6$  Hz, 1H), 1.41 (d,  $J = 13.6$  Hz, 1H), 0.05 (s, 9H);

$^{13}\text{C}$  NMR (100 MHz,  $\text{CDCl}_3$ ):  $\delta$  169.7, 163.8, 141.7, 135.2, 123.7, 110.2, 82.3, 48.3, 23.9, 20.7, -1.4; **HRMS** (EI) (m/z):  $[\text{M}]^+$  calcd for  $\text{C}_{13}\text{H}_{19}\text{Br}_2\text{NO}_3\text{Si}$  422.9501, Found 422.9502.

**5-oxo-1-(2-((trimethylsilyl)methyl)allyl)pyrrolidin-2-yl acetate, 1o**

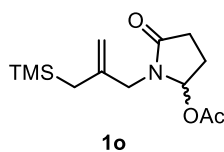

colorless oli;  $^1\text{H}$  NMR (400 MHz,  $\text{CDCl}_3$ ):  $\delta$  6.18 (dd  $J = 6.0$  Hz, 1H), 4.66 (dd,  $J = 11.1, 1.2$  Hz, 2H), 4.10 (d,  $J = 15.6$  Hz, 1H), 3.42 (d,  $J = 15.6$  Hz, 1H), 2.66–2.55 (m, 1H), 2.46–2.30 (m, 2H), 2.09–2.04 (s, 4H), 1.49 (d,  $J = 13.6$  Hz, 1H), 1.40 (d,  $J = 13.6$  Hz, 1H), 0.05 (s, 9H);  $^{13}\text{C}$  NMR (100 MHz,  $\text{CDCl}_3$ ):  $\delta$  175.7, 170.6, 141.4, 109.4, 84.6, 46.9, 28.4, 26.2, 24.1, 21.1, -1.4; **HRMS** (ESI) (m/z):  $[\text{M}+\text{Na}-\text{OAc}]^+$  calcd for  $\text{C}_{11}\text{H}_{21}\text{NNaO}_2\text{Si}$  250.1234, Found 250.1226.

**5-oxo-1-(2-((trimethylsilyl)methyl)allyl)-2,5-dihydro-1H-pyrrol-2-yl acetate, 1p**

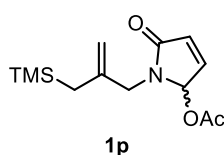

colorless oil;  $^1\text{H}$  NMR (400 MHz,  $\text{CDCl}_3$ ):  $\delta$  6.98 (d,  $J = 6.0$  Hz, 1H), 6.48 (s, 1H), 6.27 (d,  $J = 5.9$  Hz, 1H), 4.65 (s, 1H), 4.60 (s, 1H), 4.08 (d,  $J = 16.0$  Hz, 1H), 3.62 (d,  $J = 15.9$  Hz, 1H), 2.09 (s, 3H), 1.49 (d,  $J = 13.6$  Hz, 1H), 1.41 (d,  $J = 13.7$  Hz, 1H), 0.05 (s, 9H);  $^{13}\text{C}$  NMR (100 MHz,  $\text{CDCl}_3$ ):  $\delta$  170.4, 169.9, 142.4, 142.2, 129.9, 109.2, 82.9, 46.4, 24.0, 20.9, -1.4; **HRMS** (ESI) (m/z):  $[\text{M}+\text{Na}]^+$  calcd for  $\text{C}_{13}\text{H}_{21}\text{NNaO}_3\text{Si}$  290.1183, Found 290.1185.

### 3) Experiment Procedure for the Optimization Study

Substrate **1a** (1 equiv, 0.60 mmol) was dissolved in indicated solvent (0.10 M, 6.0 mL) under argon atmosphere. The resulting mixture was cooled to indicated temperature. After 10 min, acid was added dropwise to the reaction mixture. The resulting mixture was stirred and allowed to warm to indicated temperature slowly over time. The reaction mixture was quenched with saturated aqueous NaHCO<sub>3</sub> solution and diluted with CHCl<sub>3</sub>. The aqueous layer was extracted with CHCl<sub>3</sub>. The combined organic layers were dried over anhydrous Na<sub>2</sub>SO<sub>4</sub>, filtered, and evaporated under reduced pressure. The resulting residue was purified by flash column chromatography on silica gel to give product.

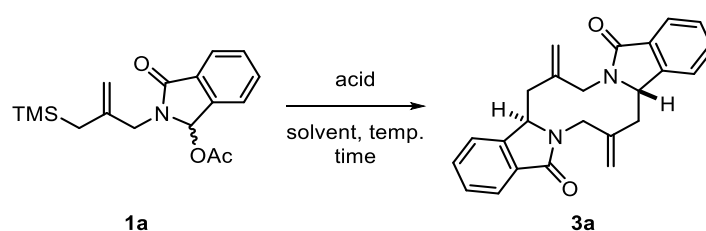

| entry | solvent                         | acid (equiv)                | temp. (°C) | time (h) | yield (%)      |
|-------|---------------------------------|-----------------------------|------------|----------|----------------|
| 1     | CH <sub>2</sub> Cl <sub>2</sub> | TfOH (1.1)                  | -78 to rt  | 6        | ND             |
| 2     | CH <sub>2</sub> Cl              | TfOH (0.50)                 | -78 to rt  | 6        | ND             |
| 3     | CH <sub>2</sub> Cl <sub>2</sub> | Bi(OTf) <sub>3</sub> (1.1)  | -78 to rt  | 6        | ND             |
| 4     | CH <sub>2</sub> Cl <sub>2</sub> | TiCl <sub>4</sub> (1.1)     | -78 to rt  | 6        | ND             |
| 5     | CH <sub>2</sub> Cl <sub>2</sub> | TMSOTf (1.1)                | -78 to rt  | 18       | 42             |
| 6     | CH <sub>2</sub> Cl <sub>2</sub> | TMSOTf (1.1)                | -78 to rt  | 6        | 67             |
| 7     | CH <sub>2</sub> Cl <sub>2</sub> | TMSOTf (2.0)                | -78 to rt  | 18       | 71             |
| 8     | CH <sub>2</sub> Cl <sub>2</sub> | TMSOTf (2.0)                | -40 to rt  | 18       | 70             |
| 9     | Et <sub>2</sub> O               | TMSOTf (1.1)                | -78 to rt  | 6        | 47             |
| 10    | Et <sub>2</sub> O               | TMSOTf (2.0)                | -78 to rt  | 6        | 54             |
| 11    | THF                             | TMSOTf (1.1)                | -78 to rt  | 6        | - <sup>a</sup> |
| 12    | CH <sub>3</sub> CN              | TMSOTf (1.1)                | -40 to rt  | 6        | 78             |
| 13    | CH <sub>3</sub> CN              | TMSOTf (1.1)                | -40 to rt  | 18       | 72             |
| 14    | CH <sub>3</sub> CN (0.5M)       | TMSOTf (1.1)                | -40 to rt  | 6        | 64             |
| 15    | CH <sub>3</sub> CN              | TMSOTf (2.0)                | -40 to rt  | 6        | 70             |
| 16    | CH <sub>3</sub> CN              | TMSOTf (1.1)                | -40 to 0   | 2        | 81             |
| 17    | CH <sub>3</sub> CN              | TMSOTf (1.1)                | 0          | 2        | 71             |
| 18    | CH <sub>3</sub> CN              | TMSOTf (0.50)               | -40 to 0   | 2        | 92             |
| 19    | CH <sub>3</sub> CN              | TMSOTf (0.20)               | -40 to 0   | 2        | 83             |
| 20    | CH <sub>3</sub> CN              | TfOH (0.50)                 | -40 to 0   | 2        | 81             |
| 21    | CH <sub>3</sub> CN              | Bi(OTf) <sub>3</sub> (0.50) | -40 to 0   | 2        | 42             |
| 22    | CH <sub>3</sub> CN              | TiCl <sub>4</sub> (0.50)    | -40 to 0   | 2        | ND             |

<sup>a</sup>The reaction mixture became viscous; ND = Not Detected.



#### 4) General Procedure for the Synthesis of 1,6-Diazecanes **3a–3f**

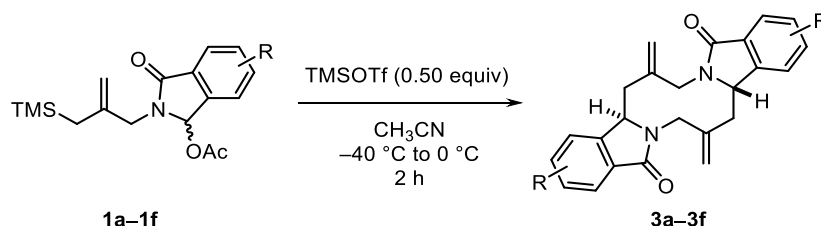

Substrate **1a–1f** (1 equiv) was dissolved in CH<sub>3</sub>CN (0.10 M) under argon atmosphere. The resulting mixture was cooled to –40 °C. After 10 min, TMSOTf (0.50 equiv) was added dropwise to the reaction mixture. The resulting mixture was stirred and allowed to warm to 0 °C slowly over 2 h. The reaction mixture was quenched with saturated aqueous NaHCO<sub>3</sub> solution and diluted with CHCl<sub>3</sub>. The aqueous layer was extracted with CHCl<sub>3</sub>. The combined organic layers were dried over anhydrous Na<sub>2</sub>SO<sub>4</sub>, filtered, and evaporated under reduced pressure. The resulting residue was purified by flash column chromatography on silica gel to give product **3a–3f**.

#### (9aR,18aS)-8,17-dimethylene-7,8,9,9a,16,17,18,18a-octahydro-5H,14H-[1,6]diazecino[2,1-a:7,6-a']diisoindole-5,14-dione, **3a**

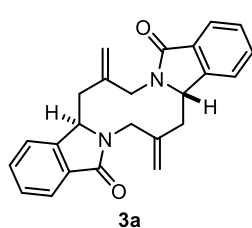

Yield: 92%; white solid; <sup>1</sup>H NMR (400 MHz, CDCl<sub>3</sub>): δ 7.89–7.82 (m, 2H), 7.62–7.55 (m, 2H), 7.49 (t, *J* = 7.4, 7.3 Hz, 4H), 4.92 (s, 2H), 4.86 (dd, *J* = 7.5, 4.0 Hz, 2H), 4.68 (s, 2H), 4.47 (d, *J* = 15.5 Hz, 2H), 4.15 (d, *J* = 15.4 Hz, 2H), 3.13 (dd, *J* = 15.2, 5.2 Hz, 2H), 2.63 (dd, *J* = 15.2, 7.5 Hz, 2H); <sup>13</sup>C NMR (100 MHz, CDCl<sub>3</sub>): δ 169.7, 145.6, 140.4, 131.9 (131.94, 131.93, 2C), 128.5, 124.0, 122.4, 116.6, 59.2, 47.4, 37.3;

HRMS (ESI) (*m/z*): [M+Na]<sup>+</sup> calcd for C<sub>24</sub>H<sub>22</sub>N<sub>2</sub>NaO<sub>2</sub> 393.1574, Found 393.1577.

#### (9aR,18aS)-2,11-dimethoxy-8,17-dimethylene-7,8,9,9a,16,17,18,18a-octahydro-5H,14H-[1,6]diazecino[2,1-a:7,6-a']diisoindole-5,14-dione, **3b**

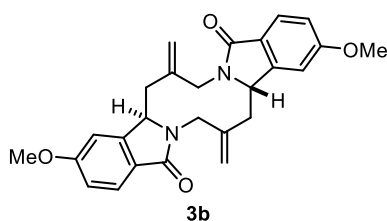

Yield: 84%; white solid; <sup>1</sup>H NMR (600 MHz, CDCl<sub>3</sub>): δ 7.75 (d, *J* = 8.4 Hz, 2H), 6.99 (dd, *J* = 8.4, 2.2 Hz, 2H), 6.94 (d, *J* = 2.2 Hz, 2H), 4.92 (s, 2H), 4.78 (dd, *J* = 7.3, 4.1 Hz, 2H), 4.67 (s, 2H), 4.44 (d, *J* = 15.6 Hz, 2H), 4.10 (d, *J* = 15.7 Hz, 2H), 3.89 (s, 6H), 3.09 (dd, *J* = 15.3, 4.0 Hz, 2H), 2.61 (dd, *J* = 15.3, 7.3 Hz, 2H); <sup>13</sup>C NMR (150 MHz, CDCl<sub>3</sub>): δ 169.7, 163.2,

148.0, 140.6, 125.3, 124.6, 116.4, 115.1, 107.2, 59.1, 55.9, 47.6, 37.2; HRMS (ESI) (*m/z*): [M+H]<sup>+</sup> calcd for C<sub>26</sub>H<sub>27</sub>N<sub>2</sub>O<sub>4</sub> 431.1971, Found 431.1979.

**(9aR,18aS)-1,10-dimethyl-8,17-dimethylene-7,8,9,9a,16,17,18,18a-octahydro-5H,14H-[1,6]diazecino[2,1-a:7,6-a']diisoindole-5,14-dione, 3c**

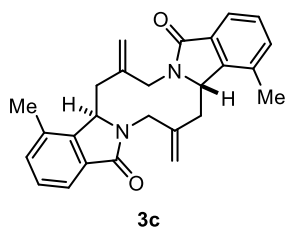

Yield: 79%; white solid; <sup>1</sup>H NMR (400 MHz, CDCl<sub>3</sub>): δ 7.67 (d, *J* = 7.0 Hz, 2H), 7.40–7.31 (m, 4H), 4.92 (s, 2H), 4.82 (dd, *J* = 6.1, 4.1 Hz, 2H), 4.51 (d, *J* = 15.2 Hz, 2H), 4.43 (s, 2H), 4.05 (d, *J* = 15.3 Hz, 2H), 3.16 (dd, *J* = 15.3, 4.0 Hz, 2H), 2.77 (dd, *J* = 15.4, 6.0 Hz, 2H), 2.50 (s, 6H); <sup>13</sup>C NMR (100 MHz, CDCl<sub>3</sub>): δ 169.9, 143.9, 140.5, 133.7, 132.6, 132.3, 128.6, 121.5, 116.9, 60.2, 48.9, 34.5, 18.6; HRMS (EI)

(*m/z*): [M]<sup>+</sup> calcd for C<sub>26</sub>H<sub>26</sub>N<sub>2</sub>O<sub>2</sub> 398.1994, Found 398.1998.

**(9aR,18aS)-1,10-difluoro-8,17-dimethylene-7,8,9,9a,16,17,18,18a-octahydro-5H,14H-[1,6]diazecino[2,1-a:7,6-a']diisoindole-5,14-dione, 3d**

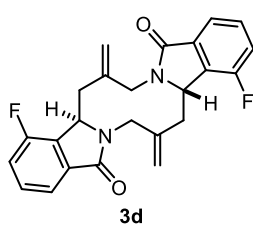

Yield: 77%; white solid; <sup>1</sup>H NMR (400 MHz, CDCl<sub>3</sub>): δ 7.65 (d, *J* = 7.5 Hz, 2H), 7.51–7.44 (m, 2H), 7.23 (t, *J* = 8.3 Hz, 2H), 4.96 (s, 2H), 4.91 (dd, *J* = 6.0, 4.0 Hz, 2H), 4.65 (s, 2H), 4.40 (d, *J* = 15.5 Hz, 2H), 3.92 (d, *J* = 15.4 Hz, 2H), 3.18 (dd, *J* = 15.3, 4.1 Hz, 2H), 2.85 (dd, *J* = 15.5, 6.0 Hz, 2H); <sup>13</sup>C NMR (100 MHz, CDCl<sub>3</sub>): δ 168.9 (d, *J*<sub>C-F</sub> = 2.2 Hz), 157.7 (d, *J*<sub>C-F</sub> = 250.8 Hz), 140.0, 135.1 (d, *J*<sub>C-F</sub> = 4.3 Hz), 131.2 (d, *J*<sub>C-F</sub> = 16.2 Hz), 130.8 (d, *J*<sub>C-F</sub> = 6.7 Hz), 119.9 (d, *J*<sub>C-F</sub> = 3.7 Hz), 118.8 (d, *J*<sub>C-F</sub> = 20.1 Hz), 116.5, 58.6, 48.6, 33.7; <sup>19</sup>F NMR (375 MHz, CDCl<sub>3</sub>): δ -119.40 (dd, *J*<sub>F-H</sub> = 9.2, *J*<sub>F-H</sub> = 4.5 Hz); HRMS (ESI)

(*m/z*): [M+Na]<sup>+</sup> calcd for C<sub>24</sub>H<sub>20</sub>F<sub>2</sub>N<sub>2</sub>NaO<sub>2</sub> 429.1385, Found 429.1385.

**(9aR,18aS)-1,10-dichloro-8,17-dimethylene-7,8,9,9a,16,17,18,18a-octahydro-5H,14H-[1,6]diazecino[2,1-a:7,6-a']diisoindole-5,14-dione, 3e**

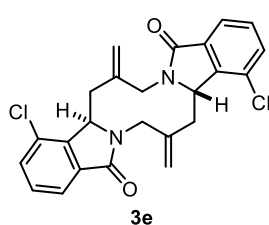

Yield: 79%; white solid; <sup>1</sup>H NMR (400 MHz, CDCl<sub>3</sub>) δ 7.76 (d, *J* = 7.5 Hz, 2H), 7.53 (d, *J* = 7.9 Hz, 2H), 7.44 (t, *J* = 7.7 Hz, 2H), 4.95 (s, 2H), 4.83 (t, *J* = 4.8 Hz, 2H), 4.53 (s, 2H), 4.44 (d, *J* = 15.2 Hz, 2H), 3.87 (d, *J* = 15.4 Hz, 2H), 3.22 (dd, *J* = 15.5, 4.2 Hz, 2H), 3.11 (dd, *J* = 15.6, 5.3 Hz, 2H); <sup>13</sup>C NMR (100 MHz, CDCl<sub>3</sub>): δ 168.6, 142.4, 139.9, 132.6, 130.2, 129.3, 122.5, 116.5, 60.7, 49.3, 31.8; HRMS (EI) (*m/z*): [M]<sup>+</sup>

calcd for C<sub>24</sub>H<sub>20</sub>Cl<sub>2</sub>N<sub>2</sub>O<sub>2</sub> 438.0902, Found 438.0905.

**(9aR,18aS)-8,17-dimethylene-1,10-dinitro-7,8,9,9a,16,17,18,18a-octahydro-5H,14H-[1,6]diazecino[2,1-a:7,6-a']diisoindole-5,14-dione, 3f**

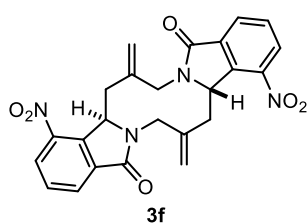

Yield: 38%; white solid; <sup>1</sup>H NMR (400 MHz, CDCl<sub>3</sub>) δ 8.39 (dd, *J* = 8.2, 1.0 Hz, 2H), 8.16 (dd, *J* = 7.6, 1.1 Hz, 2H), 7.71 (t, *J* = 7.8 Hz, 2H), 5.58 (dd, *J* = 9.8, 2.0 Hz, 2H), 5.47 (s, 2H), 5.31 (s, 2H), 4.66 (d, *J* = 16.2 Hz, 2H), 4.21 (d, *J* = 16.3 Hz, 2H), 3.07 (d, *J* = 15.3 Hz, 2H), 2.06 (dd, *J* = 15.2, 9.8 Hz, 2H); <sup>13</sup>C NMR (100 MHz, CDCl<sub>3</sub>) δ 166.6, 143.8, 141.9, 140.7, 135.2, 130.3, 130.1, 127.7, 117.0, 62.6,

47.9, 37.4; HRMS (EI) (*m/z*): [M]<sup>+</sup> calcd for C<sub>24</sub>H<sub>20</sub>N<sub>4</sub>O<sub>6</sub> 460.1383, Found 460.1380.

5) General Procedure for the Synthesis of 1,6-Diazecanes **3g–3o**

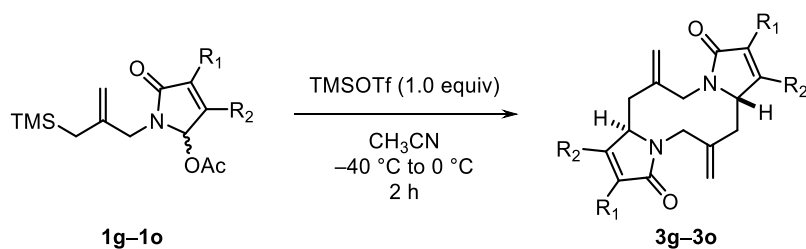

Substrate **1g–1o** (1 equiv) was dissolved in CH<sub>3</sub>CN (0.10 M) under argon atmosphere. The resulting mixture was cooled to –40 °C. After 10 min, TMSOTf (1.0 equiv) was added dropwise to the reaction mixture. The resulting mixture was stirred and allowed to warm to 0 °C slowly over 2 h. The reaction mixture was quenched with saturated aqueous NaHCO<sub>3</sub> solution and diluted with CHCl<sub>3</sub>. The aqueous layer was extracted with CHCl<sub>3</sub>. The combined organic layers were dried over anhydrous Na<sub>2</sub>SO<sub>4</sub>, filtered, and evaporated under reduced pressure. The resulting residue was purified by flash column chromatography on silica gel to give product **3g–3o**.

**(7aR,14aS)-1,2,8,9-tetramethyl-6,13-dimethylene-5,6,7,7a,12,13,14,14a-octahydro-3H,10H-dipyrrolo[1,2-a:1',2'-f][1,6]diazecine-3,10-dione, 3g**

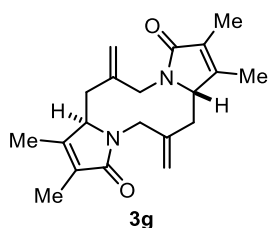

Yield: 73%; white solid; <sup>1</sup>H NMR (400 MHz, CDCl<sub>3</sub>): δ 4.95 (s, 2H), 4.83 (s, 2H), 4.22 (d, *J* = 15.2 Hz, 2H), 3.98 (s, 2H), 3.79 (d, *J* = 15.3 Hz, 2H), 2.81 (dd, *J* = 15.4, 4.5 Hz, 2H), 2.35 (dd, *J* = 15.3, 6.0 Hz, 2H), 1.94 (s, 6H), 1.79 (s, 6H); <sup>13</sup>C NMR (100 MHz, CDCl<sub>3</sub>): δ 174.0, 150.4, 141.2, 129.1, 115.4, 63.3, 48.3, 33.2, 12.4, 8.8; HRMS (ESI) (*m/z*): [M+Na]<sup>+</sup> calcd for C<sub>20</sub>H<sub>26</sub>N<sub>2</sub>NaO<sub>2</sub> 349.1887, Found 349.1888.

**(7aR,14aS)-1,8-dimethyl-6,13-dimethylene-5,6,7,7a,12,13,14,14a-octahydro-3H,10H-dipyrrolo[1,2-a:1',2'-f][1,6]diazecine-3,10-dione, 3h**

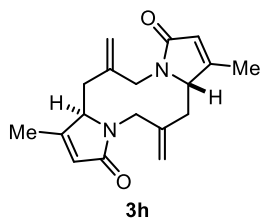

Yield: 75%; white solid; <sup>1</sup>H NMR (400 MHz, CDCl<sub>3</sub>): δ 5.88 (s, 2H), 5.01 (s, 2H), 4.93 (s, 2H), 4.22 (d, *J* = 15.4 Hz, 2H), 4.12 (t, *J* = 5.1 Hz, 2H), 3.84 (d, *J* = 15.4 Hz, 2H), 2.83 (dd, *J* = 15.3, 4.2 Hz, 2H), 2.39 (dd, *J* = 15.2, 6.2 Hz, 2H), 2.05 (d, *J* = 1.5 Hz, 6H). <sup>13</sup>C NMR (100 MHz, CDCl<sub>3</sub>): δ 173.1, 159.7, 140.8, 123.3, 116.0, 64.6, 48.0, 33.6, 14.8; HRMS (ESI) (*m/z*): [M+Na]<sup>+</sup> calcd for C<sub>18</sub>H<sub>22</sub>N<sub>2</sub>NaO<sub>2</sub> 321.1574, Found 321.1574.

**(7aR,14aS)-2,9-dimethyl-6,13-dimethylene-5,6,7,7a,12,13,14,14a-octahydro-3H,10H-dipyrrolo[1,2-a:1',2'-f][1,6]diazecine-3,10-dione, 3i**

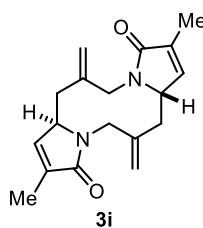

Yield: 76%; white solid;  $^1\text{H NMR}$  (400 MHz,  $\text{CD}_3\text{OD}$ ):  $\delta$  5.78 (s, 2H), 4.93 (d,  $J = 6.5$  Hz, 4H), 4.27 (t,  $J = 4.8$  Hz, 2H), 4.12 (d,  $J = 15.7$  Hz, 2H), 3.86 (d,  $J = 15.5$  Hz, 2H), 2.79 (dd,  $J = 15.4, 4.2$  Hz, 2H), 2.36 (dd,  $J = 15.2, 6.6$  Hz, 2H), 2.02 (d,  $J = 1.6$  Hz, 6H);  $^{13}\text{C NMR}$  (100 MHz,  $\text{CD}_3\text{OD}$ ):  $\delta$  175.3, 163.6, 142.2, 122.9, 116.6, 66.1, 48.6, 34.6, 14.6; **HRMS** (ESI) ( $m/z$ ):  $[\text{M}+\text{Na}]^+$  calcd for  $\text{C}_{18}\text{H}_{22}\text{N}_2\text{NaO}_2$  321.1574, Found 321.1574.

**(9aR,18aS)-8,17-dimethylene-1,2,3,4,7,8,9,9a,10,11,12,13,16,17,18,18a-hexadecahydro-5H,14H-[1,6]diazecino[2,1-a:7,6-a']diisoindole-5,14-dione, 3j**

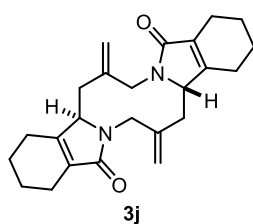

Yield: 72%; white solid;  $^1\text{H NMR}$  (400 MHz,  $\text{CDCl}_3$ ):  $\delta$  4.96 (s, 2H), 4.86 (s, 2H), 4.21 (d,  $J = 15.3$  Hz, 2H), 4.05 (s, 2H), 3.84 (d,  $J = 15.4$  Hz, 2H), 2.79 (dd,  $J = 15.2, 4.5$  Hz, 2H), 2.38–2.15 (m, 10H), 1.79–1.59 (m, 8H);  $^{13}\text{C NMR}$  (100 MHz,  $\text{CDCl}_3$ ):  $\delta$  173.3, 154.5, 141.3, 131.9, 115.2, 62.3, 47.8, 33.7, 23.5, 22.3, 22.0, 20.4; **HRMS** (ESI) ( $m/z$ ):  $[\text{M}+\text{Na}]^+$  calcd for  $\text{C}_{24}\text{H}_{30}\text{N}_2\text{NaO}_2$  401.2205, Found 401.2202.

**(7aR,14aS)-1,8-dimethoxy-6,13-dimethylene-5,6,7,7a,12,13,14,14a-octahydro-3H,10H-dipyrrolo[1,2-a:1',2'-f][1,6]diazecine-3,10-dione, 3k**

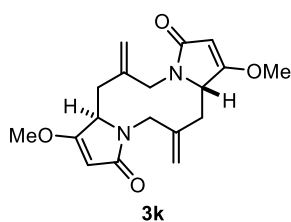

Yield: 85%; white solid;  $^1\text{H NMR}$  (400 MHz,  $\text{CDCl}_3$ ):  $\delta$  5.05 (s, 4H), 4.82 (s, 2H), 4.20 (d,  $J = 15.2$  Hz, 2H), 4.06 (t,  $J = 4.6$  Hz, 2H), 3.78 (s, 6H), 3.61 (d,  $J = 15.2$  Hz, 2H), 2.77 (dd,  $J = 14.9, 4.6$  Hz, 2H), 2.54 (dd,  $J = 14.9, 4.6$  Hz, 2H);  $^{13}\text{C NMR}$  (100 MHz,  $\text{CDCl}_3$ ):  $\delta$  176.0, 173.8, 140.9, 115.5, 94.7, 61.7, 58.1, 49.0, 31.8; **HRMS** (EI) ( $m/z$ ):  $[\text{M}]^+$  calcd for  $\text{C}_{18}\text{H}_{22}\text{N}_2\text{O}_4$  330.1580, Found 330.1583.

**(7aR,14aS)-6,13-dimethylene-2,9-diphenyl-5,6,7,7a,12,13,14,14a-octahydro-3H,10H-dipyrrolo[1,2-a:1',2'-f][1,6]diazecine-3,10-dione, 3l**

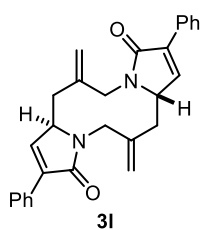

Yield: 59%; white solid;  $^1\text{H NMR}$  (400 MHz,  $\text{CDCl}_3$ )  $\delta$  7.89 (d,  $J = 6.8$  Hz, 4H), 7.42–7.34 (m, 6H), 7.19 (d,  $J = 1.9$  Hz, 2H), 5.07 (d,  $J = 23.4$  Hz, 4H), 4.41–4.37 (m, 2H), 4.34 (d,  $J = 15.2$  Hz, 2H), 3.89 (d,  $J = 15.5$  Hz, 2H), 2.94 (dd,  $J = 15.0, 4.3$  Hz, 2H), 2.55 (dd,  $J = 15.0, 6.0$  Hz, 2H);  $^{13}\text{C NMR}$  (100 MHz,  $\text{CDCl}_3$ ):  $\delta$  171.9, 141.9, 140.8, 136.1, 131.6, 128.8, 128.6, 127.2, 116.3, 60.2, 48.5, 34.5; **HRMS** (EI) ( $m/z$ ):  $[\text{M}]^+$  calcd for  $\text{C}_{28}\text{H}_{26}\text{N}_2\text{O}_2$  422.1994, Found 422.1993.

**(7aR,14aS)-2,9-dibromo-1,8-dimethoxy-6,13-dimethylene-5,6,7,7a,12,13,14,14a-octahydro-3H,10H-dipyrrolo[1,2-a:1',2'-f][1,6]diazecine-3,10-dione, 3m**

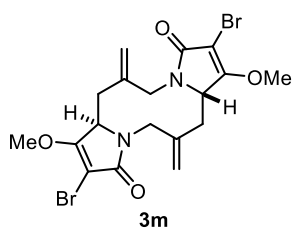

Yield: 55%; white solid;  $^1\text{H NMR}$  (400 MHz,  $\text{CDCl}_3$ ):  $\delta$  5.13 (s, 2H), 4.88 (s, 2H), 4.28–4.23 (m, 8H), 4.00 (t,  $J = 4.3$  Hz, 2H), 3.57 (d,  $J = 15.0$  Hz, 2H), 2.74 (dd,  $J = 15.1, 4.6$  Hz, 2H), 2.58 (dd,  $J = 15.0, 4.0$  Hz, 2H);  $^{13}\text{C NMR}$  (100 MHz,  $\text{CDCl}_3$ ):  $\delta$  169.7, 168.1, 140.0, 116.4, 85.5, 62.8, 59.4, 50.5, 31.2; **HRMS** (EI) ( $m/z$ ):  $[\text{M}]^+$  calcd for  $\text{C}_{18}\text{H}_{20}\text{Br}_2\text{N}_2\text{O}_4$  485.9790, Found 485.9793.

**(7aR,14aS)-6,13-dimethylenedodecahydro-3H,10H-dipyrrolo[1,2-a:1',2'-f][1,6]diazecine-3,10-dione, 3o**

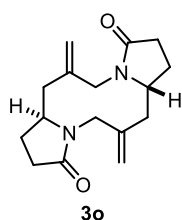

Yield: 22%; white solid;  $^1\text{H NMR}$  (400 MHz,  $\text{CD}_3\text{OD}$ ):  $\delta$  5.27 (s, 2H), 4.97 (s, 2H), 4.19–4.11 (m, 2H), 4.10–3.98 (m, 4H), 2.54 (d,  $J = 15.2$  Hz, 2H), 2.49–2.42 (m, 4H), 2.35–2.20 (m, 4H), 1.72–1.65 (m, 2H);  $^{13}\text{C NMR}$  (100 MHz,  $\text{CD}_3\text{OD}$ ):  $\delta$  178.7, 143.3, 115.2, 59.3, 46.8, 42.7, 31.2, 26.9; **HRMS** (ESI) ( $m/z$ ):  $[\text{M}+\text{Na}]^+$  calcd for  $\text{C}_{16}\text{H}_{22}\text{N}_2\text{NaO}_2$  297.1574, Found 297.1574.

## 6) Procedure for the Synthesis of **4**

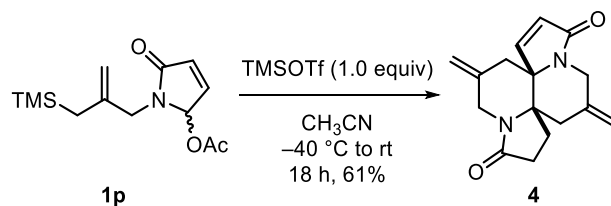

Substrate **1p** (56.4 mg, 0.211 mmol, 1 equiv) was dissolved in CH<sub>3</sub>CN (2.10 mL) under argon atmosphere at room temperature. The resulting mixture was cooled to  $-40^\circ\text{C}$ . After 10 min, TMSOTf (38.0  $\mu\text{L}$ , 0.211 mmol, 1.00 equiv) was added dropwise to the reaction mixture. The resulting mixture was allowed to warm to room temperature slowly over 5 h and additionally stirred for 12 h at room temperature. The reaction mixture was quenched with saturated aqueous NaHCO<sub>3</sub> solution (3 mL) and diluted with CH<sub>2</sub>Cl<sub>2</sub> (3 mL). The aqueous layer was extracted with CH<sub>2</sub>Cl<sub>2</sub> (3  $\times$  3 mL). The combined organic layers were dried over anhydrous Na<sub>2</sub>SO<sub>4</sub>, filtered, and evaporated under reduced pressure. The resulting residue was purified by column chromatography on silica gel (CH<sub>3</sub>OH : EtOAc = 1 : 5) to obtain product **4** (17.3 mg, 60.7%).

### (3aS,10aR)-5,12-dimethylene-2,3,5,6,12,13-hexahydro-1H,4H,8H,11H-dipyrrolo[2,1-e:2',1'-j][1,5]naphthyridine-1,8-dione, **4**

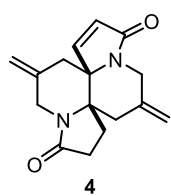

Yield: 61%; white solid; <sup>1</sup>H NMR (400 MHz, CDCl<sub>3</sub>):  $\delta$  7.02 (d,  $J$  = 6.0 Hz, 1H), 6.27 (d,  $J$  = 6.0 Hz, 1H), 5.11 (d,  $J$  = 10.8 Hz, 2H), 4.92 (d,  $J$  = 3.4 Hz, 2H), 4.70–4.61 (m, 2H), 3.49 (dd,  $J$  = 14.7, 6.5 Hz, 2H), 3.24–3.16 (m, 2H), 2.44–2.33 (m, 1H), 2.22–2.13 (m, 1H), 2.07 (dd,  $J$  = 13.7, 1.8 Hz, 2H), 1.61–1.54 (m, 1H), 1.47–1.39 (m, 1H); <sup>13</sup>C NMR (100 MHz, CDCl<sub>3</sub>):  $\delta$  173.2, 168.1, 148.2, 137.2, 137.1, 129.0, 114.7 (114.73, 114.71, 2C), 68.0, 63.5, 42.6, 41.8, 39.6, 36.9, 29.5, 24.6; HRMS (ESI) (m/z): [M+Na]<sup>+</sup> calcd for C<sub>16</sub>H<sub>18</sub>N<sub>2</sub>NaO<sub>2</sub> 293.1261, Found 293.1263.

## 7) General Procedure for the Synthesis of **9a–9e**

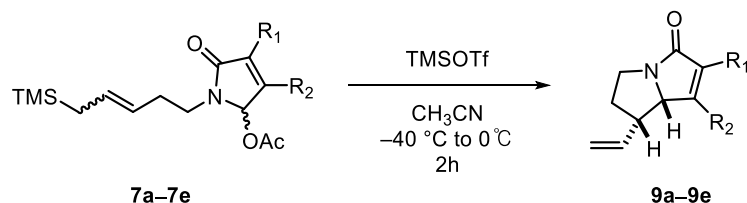

**Note 1** : Substrates **7a–7e** were synthesized from 5-(trimethylsilyl)pent-3-en-1-ol<sup>5</sup> according to the general procedure for the preparation of substrate **1a–1p**. <sup>1</sup>H and <sup>13</sup>C NMR spectral data of substrates **7a–7e** for the major isomer were reported.

Substrate **7a–7e** (1 equiv) was dissolved in CH<sub>3</sub>CN (0.10 M) under argon atmosphere. The resulting mixture was cooled to –40 °C. After 10 min, TMSOTf (0.50 or 1.0 equiv, **Note 2**) was added dropwise to the reaction mixture. The resulting mixture was stirred and allowed to warm to 0 °C slowly over 2 h. The reaction mixture was quenched with saturated aqueous NaHCO<sub>3</sub> solution and diluted with CH<sub>2</sub>Cl<sub>2</sub>. The aqueous layer was extracted with CH<sub>2</sub>Cl<sub>2</sub>. The combined organic layers were dried over anhydrous Na<sub>2</sub>SO<sub>4</sub>, filtered, and evaporated under reduced pressure. The resulting residue was purified by flash column chromatography on silica gel to give product **9a–9e**.

**Note 2** : 0.50 equiv of TMSOTf was used for **7a–7c** and 1.0 equiv of TMSOTf was used for **7d** and **7e**.

### 3-oxo-2-(5-(trimethylsilyl)pent-3-en-1-yl)isoindolin-1-yl acetate, **7a**

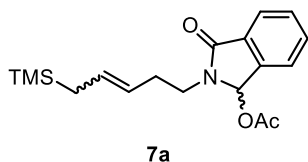

colorless oil; <sup>1</sup>H NMR (400 MHz, CDCl<sub>3</sub>) δ 7.84–7.76 (m, 1H), 7.53 (d, *J* = 1.8 Hz, 3H), 7.02 (d, *J* = 7.9 Hz, 1H), 5.56–5.41 (m, 1H), 5.31–5.16 (m, 1H), 3.96–3.69 (m, 1H), 3.34–3.15 (m, 1H), 2.60–2.24 (m, 2H), 2.16 (s, 3H), 1.38 (d, *J* = 7.9 Hz, 2H), –0.11 (s, 9H); <sup>13</sup>C NMR (100 MHz, CDCl<sub>3</sub>): δ 171.3, 167.9, 142.7, 141.1, 132.3, 130.3, 129.7, 124.5, 123.9, 123.7, 81.3, 40.3, 31.8, 22.9, 21.2, –2.0; HRMS (EI) (*m/z*): [M]<sup>+</sup> calcd for C<sub>18</sub>H<sub>25</sub>NO<sub>3</sub>Si 331.1604, Found 331.1607.

### 5,6-dimethoxy-3-oxo-2-(5-(trimethylsilyl)pent-3-en-1-yl)isoindolin-1-yl acetate, **7b**

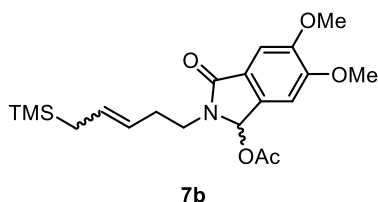

white solid; <sup>1</sup>H NMR (400 MHz, CDCl<sub>3</sub>) δ 7.27 (s, 1H), 7.00 (s, 1H), 6.89 (s, 1H), 5.54–5.42 (m, 1H), 5.29–5.16 (m, 1H), 3.93 (s, 6H), 3.84–3.72 (m, 1H), 3.26–3.14 (m, 1H), 2.47–2.22 (m, 2H), 2.17 (s, 3H), 1.38 (d, *J* = 8.4 Hz, 2H), –0.10 (s, 9H); <sup>13</sup>C NMR (100 MHz, CDCl<sub>3</sub>): δ 171.5, 168.1, 152.9, 151.2, 134.5, 129.5, 124.8, 124.5, 106.3, 105.4, 81.4, 56.5, 56.4, 40.4, 31.9, 22.9, 21.3, –2.0; HRMS (EI) (*m/z*): [M]<sup>+</sup> calcd for C<sub>20</sub>H<sub>29</sub>NO<sub>5</sub>Si 391.1815, Found 391.1813.

5. M. Tredwell, J. A. R. Luft, M. Schuler, K. Tenza, K. N. Houk and V. Gouverneur, *Angew. Chem., Int. Ed.*, 2008, **47**, 357–360

### 5,6-dichloro-3-oxo-2-(5-(trimethylsilyl)pent-3-en-1-yl)isoindolin-1-yl acetate, 7c

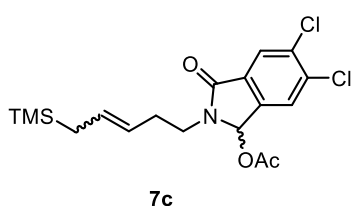

white solid;  $^1\text{H NMR}$  (400 MHz,  $\text{CDCl}_3$ )  $\delta$  7.85 (s, 1H), 7.65 (s, 1H), 6.92 (s, 1H), 5.55–5.41 (m, 1H), 5.27–5.13 (m, 1H), 3.79 (dq,  $J = 14.2, 7.0$  Hz, 1H), 3.28–3.15 (m, 1H), 2.41–2.24 (m, 2H), 2.17 (s, 3H), 1.37 (d,  $J = 7.9$  Hz, 2H), -0.05 (s, 9H);  $^{13}\text{C NMR}$  (100 MHz,  $\text{CDCl}_3$ )  $\delta$  171.0, 165.7, 140.2, 136.8, 135.3, 132.1, 130.0, 126.4, 125.5, 124.1, 80.5, 40.6, 31.7, 22.9, 21.1, -2.0;

**HRMS** (EI) (m/z):  $[\text{M}]^+$  calcd for  $\text{C}_{18}\text{H}_{23}\text{Cl}_2\text{NO}_3\text{Si}$  399.0824, Found 399.0827.

### 3,4-dimethyl-5-oxo-1-(5-(trimethylsilyl)pent-3-en-1-yl)-2,5-dihydro-1H-pyrrol-2-yl acetate, 7d

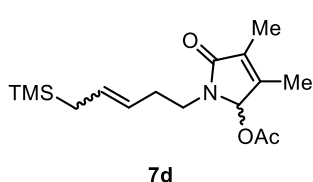

colorless oil;  $^1\text{H NMR}$  (400 MHz,  $\text{CDCl}_3$ )  $\delta$  6.40 (s, 1H), 5.51–5.38 (m, 1H), 5.24–5.11 (m, 1H), 3.64–3.51 (m, 1H), 3.11–2.99 (m, 1H), 2.34–2.16 (m, 2H), 2.15 (s, 3H), 1.83 (s, 3H), 1.79 (s, 3H), 1.38 (d,  $J = 8.0$  Hz, 2H), -0.06 (s, 9H);  $^{13}\text{C NMR}$  (100 MHz,  $\text{CDCl}_3$ ):  $\delta$  171.5, 171.1, 144.8, 131.4, 129.3, 124.8, 82.8, 40.3, 32.0, 22.9, 21.1,

-11.4, -8.6, -1.9; **HRMS** (EI) (m/z):  $[\text{M}]^+$  calcd for  $\text{C}_{16}\text{H}_{27}\text{NO}_3\text{Si}$  309.1760, Found 309.1758.

### 3-methoxy-5-oxo-1-(5-(trimethylsilyl)pent-3-en-1-yl)-2,5-dihydro-1H-pyrrol-2-yl acetate, 7e

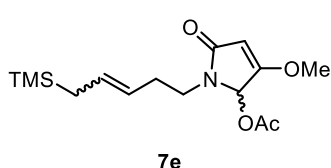

colorless oil;  $^1\text{H NMR}$  (400 MHz,  $\text{CDCl}_3$ )  $\delta$  6.46 (s, 1H), 5.50–5.38 (m, 1H), 5.21–5.09 (m, 1H), 5.03 (s, 1H), 3.77 (s, 3H), 3.60–3.48 (m, 1H), 3.06–2.92 (m, 1H), 2.27–2.14 (m, 2H), 2.13 (s, 3H), 1.37 (d,  $J = 8.2$  Hz, 2H), -0.07 (s, 9H);  $^{13}\text{C NMR}$  (100 MHz,  $\text{CDCl}_3$ ):  $\delta$  171.0, 170.6, 170.5, 129.3, 124.6, 94.8, 79.4, 58.6, 39.7,

31.9, 22.9, 21.0, -1.9; **HRMS** (EI) (m/z):  $[\text{M}]^+$  calcd for  $\text{C}_{15}\text{H}_{25}\text{NO}_4\text{Si}$  311.1553, Found 311.1554.

### (1S,9bS)-1-vinyl-1,2,3,9b-tetrahydro-5H-pyrrolo[2,1-a]isoindol-5-one, 9a

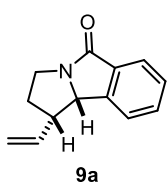

Yield: 77%; colorless oil;  $^1\text{H NMR}$  (400 MHz,  $\text{CDCl}_3$ )  $\delta$  7.78 (d,  $J = 7.5$  Hz, 1H), 7.51 (t,  $J = 7.5$  Hz, 1H), 7.43 (t,  $J = 7.4$  Hz, 1H), 7.36 (d,  $J = 7.5$  Hz, 1H), 5.11–4.95 (m, 2H), 4.88 (d,  $J = 6.1$  Hz, 1H), 4.81 (d,  $J = 12.0$  Hz, 1H), 3.84–3.73 (m, 1H), 3.45 (t,  $J = 10.5$  Hz, 1H), 3.12 (q,  $J = 6.4$  Hz, 1H), 2.62–2.50 (m, 1H), 2.36–2.26 (m, 1H);  $^{13}\text{C NMR}$  (100 MHz,  $\text{CDCl}_3$ ):  $\delta$  171.4, 143.9, 135.0,

134.8, 131.6, 128.4, 123.9, 123.5, 116.7, 67.7, 42.9, 40.8, 34.7; **HRMS** (EI) (m/z):  $[\text{M}]^+$  calcd for  $\text{C}_{13}\text{H}_{13}\text{NO}$  199.0997, Found 199.0994.



**(1S,9bS)-7,8-dimethoxy-1-vinyl-1,2,3,9b-tetrahydro-5H-pyrrolo[2,1-a]isoindol-5-one, 9b**

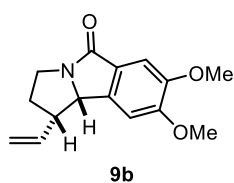

Yield: 84%; white solid;  $^1\text{H NMR}$  (400 MHz,  $\text{CDCl}_3$ )  $\delta$  7.22 (s, 1H), 6.80 (s, 1H), 5.09–4.94 (m, 2H), 4.85–4.76 (m, 2H), 3.91 (d,  $J = 5.0$  Hz, 6H), 3.77–3.69 (m, 1H), 3.43–3.35 (m, 1H), 3.09–3.02 (m, 1H), 2.57–2.46 (m, 1H), 2.30–2.23 (m, 1H);  $^{13}\text{C NMR}$  (100 MHz,  $\text{CDCl}_3$ )  $\delta$  172.2, 152.8, 149.9, 137.7, 135.0, 127.1, 116.5, 105.6, 105.5, 67.5, 56.3(56.34, 56.25, 2C) 42.9, 40.1, 34.9; **HRMS** (EI) (m/z):  $[\text{M}]^+$  calcd for  $\text{C}_{15}\text{H}_{17}\text{NO}_3$  259.1208, Found 259.1211.

**(1S,9bS)-7,8-dichloro-1-vinyl-1,2,3,9b-tetrahydro-5H-pyrrolo[2,1-a]isoindol-5-one, 9c**

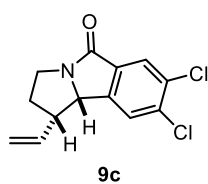

Yield: 83%; white solid;  $^1\text{H NMR}$  (400 MHz,  $\text{CDCl}_3$ )  $\delta$  7.83 (s, 1H), 7.46 (s, 1H), 5.05–5.01 (m, 2H), 4.90–4.86 (m, 1H), 4.83 (d,  $J = 6.0$  Hz, 1H), 3.82–3.73 (m, 1H), 3.47–3.40 (m, 1H), 3.14–3.08 (m, 1H), 2.60–2.50 (m, 1H), 2.34–2.27 (m, 1H);  $^{13}\text{C NMR}$  (100 MHz,  $\text{CDCl}_3$ )  $\delta$  169.0, 143.0, 136.2, 134.9, 134.1, 133.3, 125.8, 125.7, 117.6, 67.1, 42.9, 41.0, 34.6; **HRMS** (EI) (m/z):  $[\text{M}]^+$  calcd for  $\text{C}_{13}\text{H}_{11}\text{Cl}_2\text{NO}$  267.0218, Found 267.0218.

**(7S,7aS)-1,2-dimethyl-7-vinyl-5,6,7,7a-tetrahydro-3H-pyrrolizin-3-one, 9d**

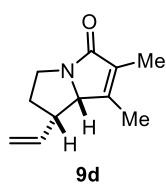

Yield: 77%; colorless oil;  $^1\text{H NMR}$  (400 MHz,  $\text{CDCl}_3$ )  $\delta$  5.30–5.17 (m, 1H), 5.04 (dd,  $J = 17.1, 1.8$  Hz, 1H), 4.93 (dd,  $J = 10.1, 1.7$  Hz, 1H), 4.14 (d,  $J = 5.9$  Hz, 1H), 3.56–3.47 (m, 1H), 3.27 (ddd,  $J = 11.1, 9.1, 2.1$  Hz, 1H), 2.88–2.80 (m, 1H), 2.49–2.37 (m, 1H), 2.18–2.10 (m, 1H), 1.84 (s, 3H), 1.73 (s, 3H);  $^{13}\text{C NMR}$  (100 MHz,  $\text{CDCl}_3$ )  $\delta$  176.8, 150.0, 134.6, 131.1, 116.1, 71.2, 42.5, 40.8, 35.3, 12.9, 8.7; **HRMS** (EI) (m/z):  $[\text{M}]^+$  calcd for  $\text{C}_{11}\text{H}_{15}\text{NO}$  177.1154, Found 177.1152.

**(7S,7aS)-1-methoxy-7-vinyl-5,6,7,7a-tetrahydro-3H-pyrrolizin-3-one, 9e**

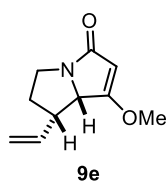

Yield: 86%; colorless oil;  $^1\text{H NMR}$  (400 MHz,  $\text{CDCl}_3$ )  $\delta$  5.49–5.37 (m, 1H), 5.08 (d,  $J = 17.1$  Hz, 1H), 5.00 (d,  $J = 10.3$  Hz, 1H), 4.95 (s, 1H), 4.27 (d,  $J = 6.4$  Hz, 1H), 3.73 (s, 3H), 3.62–3.53 (m, 1H), 3.20–3.14 (m, 1H), 2.90 (q,  $J = 7.4$  Hz, 1H), 2.38–2.27 (m, 1H), 2.17–2.09 (m, 1H);  $^{13}\text{C NMR}$  (100 MHz,  $\text{CDCl}_3$ )  $\delta$  177.1, 176.1, 134.2, 116.7, 96.3, 68.1, 58.4, 42.2, 41.4, 34.3; **HRMS** (EI) (m/z):  $[\text{M}]^+$  calcd for  $\text{C}_{10}\text{H}_{13}\text{NO}_2$  179.0946, Found 179.0948.

## 8) Procedure for the Reaction of **11**

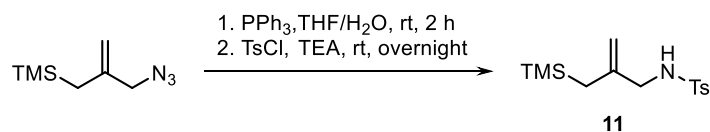

PPh<sub>3</sub> (600 mg, 2.29 mmol, 1.10 equiv) was added to a stirred solution of (2-(azidomethyl)allyl)trimethylsilane<sup>6</sup> (352 mg, 2.08 mmol, 1 equiv) in THF/H<sub>2</sub>O (6 mL/2.4 mL) at room temperature. The reaction mixture was stirred for 20 h at room temperature. After 20 h, TsCl (476 mg, 2.50 mmol, 1.20 equiv) was added, followed by TEA (0.348 mL, 2.50 mmol, 1.20 equiv). The resulting mixture was stirred for overnight at room temperature. The reaction mixture was quenched with saturated aqueous NaHCO<sub>3</sub> solution (8 mL) and diluted with EtOAc (8 mL). The aqueous layer was extracted with EtOAc (3 × 8 mL). The combined organic layers were dried over anhydrous Na<sub>2</sub>SO<sub>4</sub>, filtered, and evaporated under reduced pressure. The resulting residue was purified by flash column chromatography on silica gel (EtOAc : Hexane = 1 : 6) to obtain product **11** (467 mg, 76.5%).

### 4-methyl-N-(2-((trimethylsilyl)methyl)allyl)benzenesulfonamide, **11**

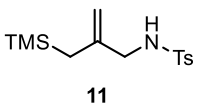 white solid; <sup>1</sup>H NMR (400 MHz, CDCl<sub>3</sub>) δ 7.75 (d, *J* = 8.3 Hz, 2H), 7.30 (d, *J* = 8.2 Hz, 2H), 4.76 (s, 1H), 4.61 (s, 1H), 4.49 (t, *J* = 6.3 Hz, 1H), 3.41 (d, *J* = 6.4 Hz, 2H), 2.42 (s, 3H), 1.46 (s, 2H), -0.04 (s, 9H); <sup>13</sup>C NMR (100 MHz, CDCl<sub>3</sub>) δ 143.6, 142.5, 137.1, 129.8, 127.3, 109.8, 49.5, 24.2, 21.7, -1.4; HRMS (EI) (*m/z*): [*M*]<sup>+</sup> calcd for C<sub>14</sub>H<sub>23</sub>NO<sub>2</sub>SSi 297.1219, Found 297.1217.

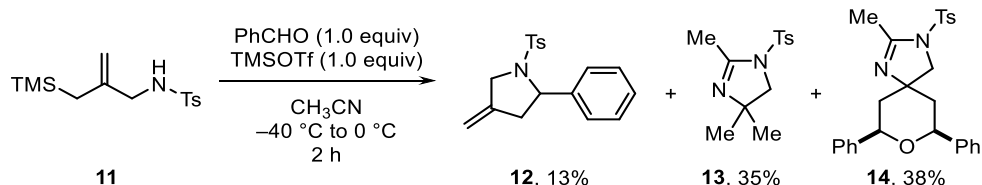

Substrate **11** (160 mg, 0.538 mmol, 1 equiv) was dissolved in CH<sub>3</sub>CN (5.40 mL) under argon atmosphere. The resulting mixture was cooled to -40 °C. After 10 min, PhCHO (55.0 μL, 0.538 mmol, 1.00 equiv) was added to the reaction mixture, followed by TMSOTf (97.0 μL, 0.538 mmol, 1.00 equiv) dropwisely. The resulting mixture was stirred and allowed to warm to 0 °C slowly over 2 h. The reaction mixture was quenched with saturated aqueous NaHCO<sub>3</sub> solution and diluted with CH<sub>2</sub>Cl<sub>2</sub>. The aqueous layer was extracted with CH<sub>2</sub>Cl<sub>2</sub>. The combined organic layers were dried over anhydrous Na<sub>2</sub>SO<sub>4</sub>, filtered, and evaporated under reduced pressure. The resulting residue was purified by flash column chromatography on silica gel (EtOAc : Hexane = 5 : 5) to obtain the products **12** (21.4 mg, 12.7%), **13** (50.7 mg, 35.4%) and **14** (93.7 mg, 37.8%).

#### 4-methylene-2-phenyl-1-tosylpyrrolidine, 12

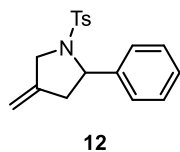

12

white solid;  $^1\text{H NMR}$  (400 MHz,  $(\text{CD}_3)_2\text{CO}$ )  $\delta$  7.71 (d,  $J = 8.3$  Hz, 2H), 7.40 (d,  $J = 8.1$  Hz, 2H), 7.35–7.20 (m, 5H), 5.05–4.96 (m, 2H), 4.90 (s, 1H), 4.10 (s, 2H), 2.72–2.63 (m, 1H), 2.48–2.41 (m, 4H);  $^{13}\text{C NMR}$  (100 MHz,  $(\text{CD}_3)_2\text{CO}$ )  $\delta$  144.9, 144.4, 143.8, 136.3, 130.6, 129.1, 128.4, 127.9, 127.2, 108.3, 63.9, 53.3, 41.9, 21.4; **HRMS** (EI) (m/z):  $[\text{M}]^+$  calcd for  $\text{C}_{18}\text{H}_{19}\text{NO}_2\text{S}$

313.1136, Found 313.1138.

#### 2,4,4-trimethyl-1-tosyl-4,5-dihydro-1H-imidazole, 13

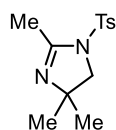

13

white solid;  $^1\text{H NMR}$  (400 MHz,  $\text{CDCl}_3$ )  $\delta$  7.73 (d,  $J = 8.3$  Hz, 2H), 7.34 (d,  $J = 8.1$  Hz, 2H), 3.46 (s, 2H), 2.44 (s, 3H), 2.25 (s, 3H), 1.13 (s, 6H);  $^{13}\text{C NMR}$  (100 MHz,  $\text{CDCl}_3$ )  $\delta$  153.4, 144.7, 135.6, 130.2, 127.3, 64.5, 60.1, 28.6, 21.7, 17.0; **HRMS** (EI) (m/z):  $[\text{M}]^+$  calcd for  $\text{C}_{13}\text{H}_{18}\text{N}_2\text{O}_2\text{S}$  266.1089, Found 266.1091.

#### (7R,9S)-2-methyl-7,9-diphenyl-3-tosyl-8-oxa-1,3-diazaspiro[4.5]dec-1-ene, 14

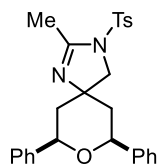

14

white solid;  $^1\text{H NMR}$  (400 MHz,  $(\text{CD}_3)_2\text{CO}$ )  $\delta$  7.92 (d,  $J = 8.3$  Hz, 2H), 7.50 (d,  $J = 8.1$  Hz, 2H), 7.40 (d,  $J = 6.8$  Hz, 4H), 7.34 (t,  $J = 7.5$  Hz, 4H), 7.26 (t,  $J = 7.2$  Hz, 2H), 4.59 (d,  $J = 12.1$  Hz, 2H), 3.99 (s, 2H), 2.40 (s, 3H), 2.25 (s, 3H), 1.73 (t,  $J = 12.7$  Hz, 2H), 1.38 (d,  $J = 13.1$  Hz, 2H);  $^{13}\text{C NMR}$  (100 MHz, Acetone)  $\delta$  154.5, 145.7, 143.4, 136.2, 131.1, 129.0, 128.1 (128.14, 128.07, 2C),

126.6, 76.6, 68.5, 57.5, 45.5, 21.5, 17.1; **HRMS** (EI) (m/z):  $[\text{M}]^+$  calcd for  $\text{C}_{27}\text{H}_{28}\text{N}_2\text{O}_3\text{S}$  460.1821, Found 460.1819.

## 9) Cross-over Experiment

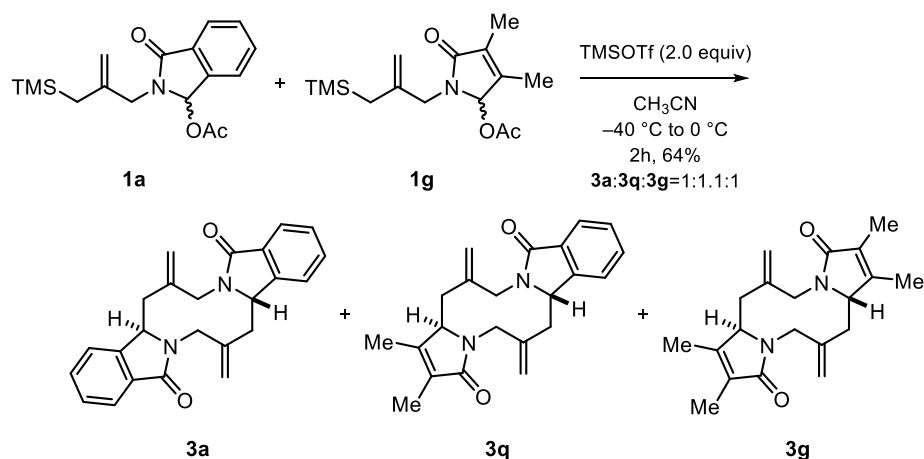

Substrate **1a** (118 mg, 0.372 mmol, 1 equiv) and **1g** (110 mg, 0.372 mmol, 1 equiv) were dissolved in CH<sub>3</sub>CN (7.40 mL) under argon atmosphere at room temperature. The resulting mixture was cooled to -40 °C. After 10 min, TMSOTf (0.135 mL, 0.744 mmol, 2.00 equiv) was added dropwise to the reaction mixture. The resulting mixture was stirred and allowed to warm to 0 °C slowly over 2 h. The reaction mixture was quenched with saturated aqueous NaHCO<sub>3</sub> solution (10 mL) and diluted with CHCl<sub>3</sub> (10 mL). The aqueous layer was extracted with CHCl<sub>3</sub> (3 × 10 mL). The combined organic layers were dried over anhydrous Na<sub>2</sub>SO<sub>4</sub>, filtered, and evaporated under reduced pressure. The resulting residue was purified by flash column chromatography on silica gel (CHCl<sub>3</sub> : EtOAc = 8 : 2) to obtain the corresponding 1,6-diazecans **3a** (28.1 mg, 20.4%), **3q** (29.3 mg, 22.6%,) and **3g** (25.0 mg, 20.6%,) respectively.

### (7aS,16aR)-1,2-dimethyl-6,15-dimethylene-5,6,7,7a,14,15,16,16a-octahydro-3H,12H-pyrrolo[1',2':6,7][1,6]diazecino[2,1-a]isoindole-3,12-dione, **3q**

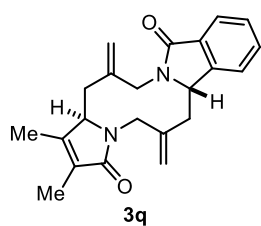

white solid; <sup>1</sup>H NMR (400 MHz, CDCl<sub>3</sub>): δ 7.85–7.81 (m, 1H), 7.57 (td, *J* = 7.4, 1.2 Hz, 1H), 7.49–7.43 (m, 2H), 5.03 (s, 1H), 4.93 (s, 1H), 4.83 (s, 1H), 4.80 (dd, *J* = 6.9, 4.2 Hz, 1H), 4.52 (s, 1H), 4.41 (d, *J* = 15.4 Hz, 1H), 4.27 (d, *J* = 15.5 Hz, 1H), 4.12–4.02 (m, 2H), 3.86 (d, *J* = 15.5 Hz, 1H), 3.08 (dd, *J* = 15.2, 4.1 Hz, 1H), 2.86 (dd, *J* = 14.6, 4.3 Hz, 1H), 2.60 (dd, *J* = 15.3, 6.8 Hz, 1H), 2.39 (dd, *J* = 15.2, 6.7 Hz, 1H), 1.97 (s, 3H), 1.81 (s, 3H); <sup>13</sup>C NMR (100 MHz, CDCl<sub>3</sub>): δ 173.8, 169.9, 150.3, 145.7, 140.9, 140.7, 132.0, 131.9, 129.1, 128.4, 123.9, 122.5, 116.1, 115.9, 62.9, 59.5, 47.8, , 47.7, 36.4, 34.2, 12.5, 8.9; HRMS (ESI) (*m/z*): [M+Na]<sup>+</sup> calcd for C<sub>22</sub>H<sub>24</sub>N<sub>2</sub>NaO<sub>2</sub> 371.1730, Found 371.1731.

## 2. $^1\text{H}$ , $^{13}\text{C}$ and $^{19}\text{F}$ NMR Spectra of Compounds

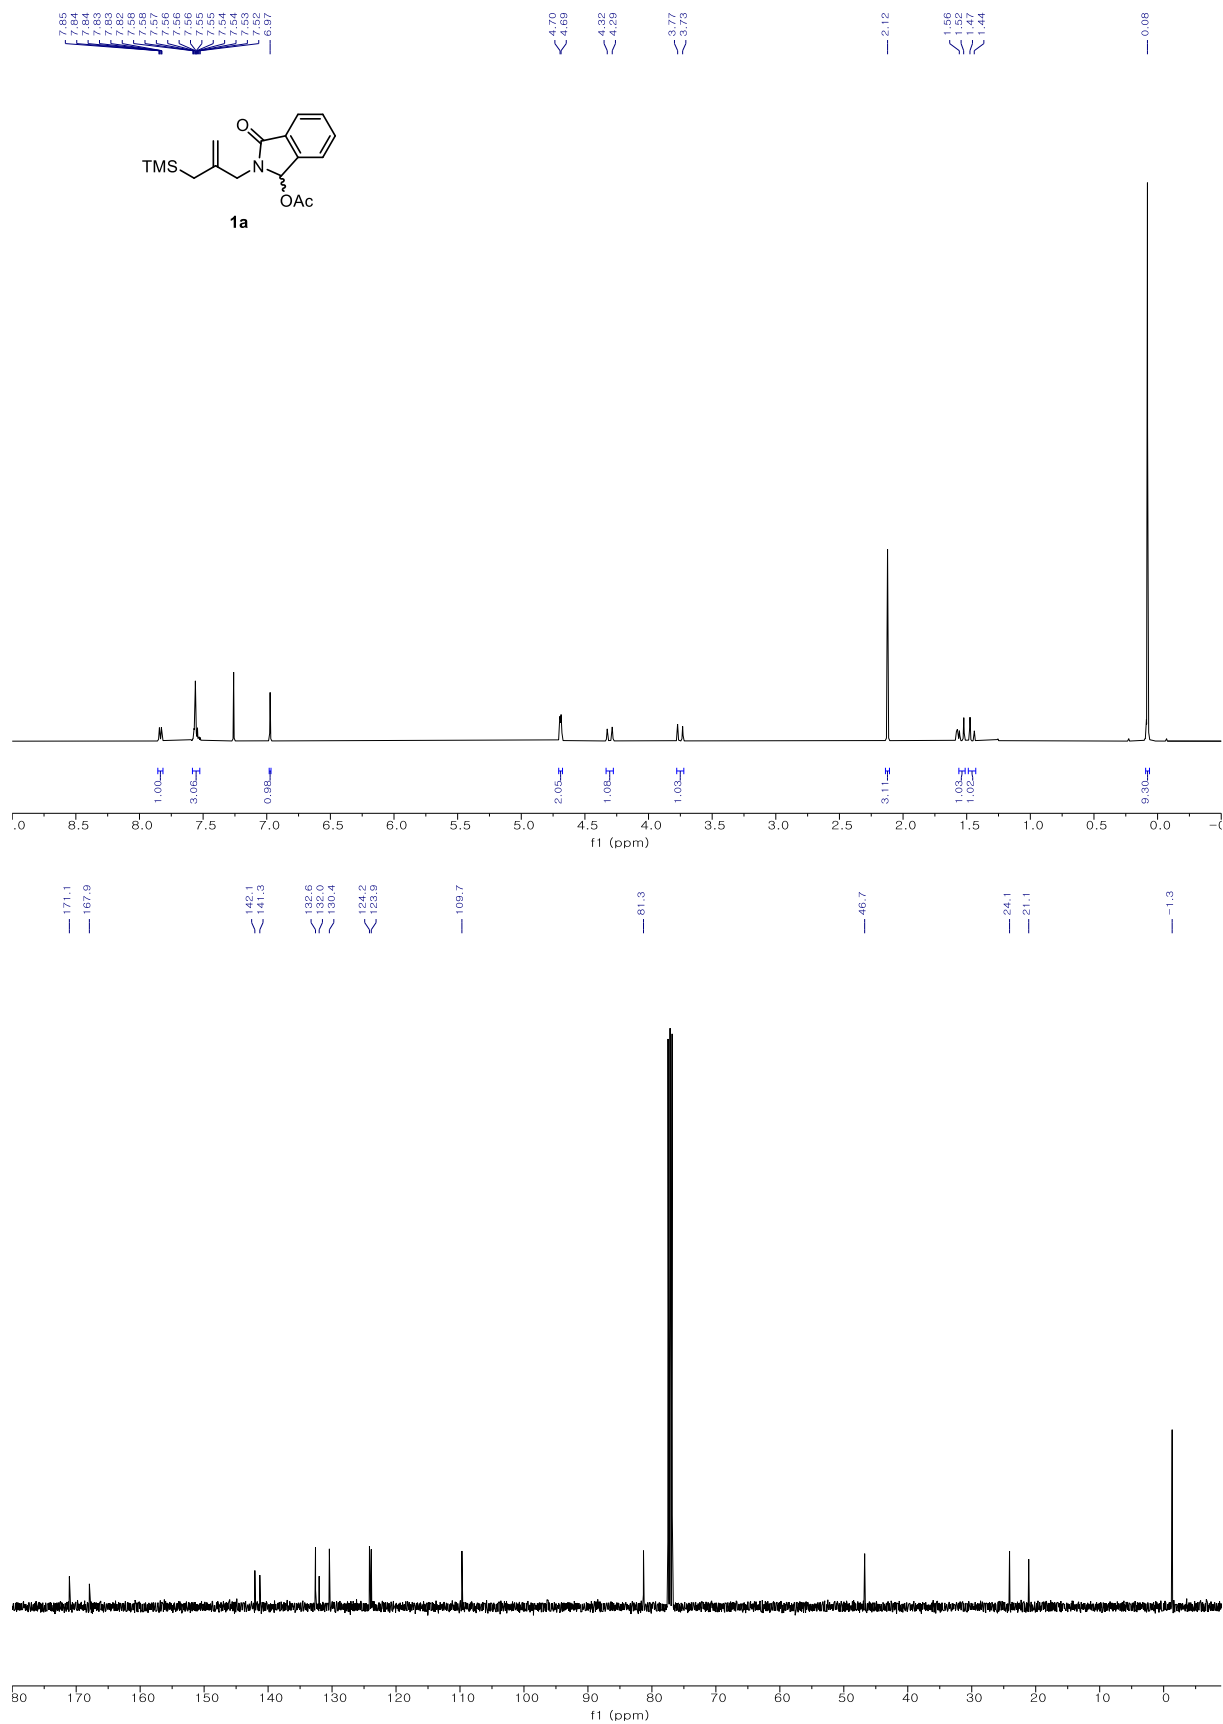

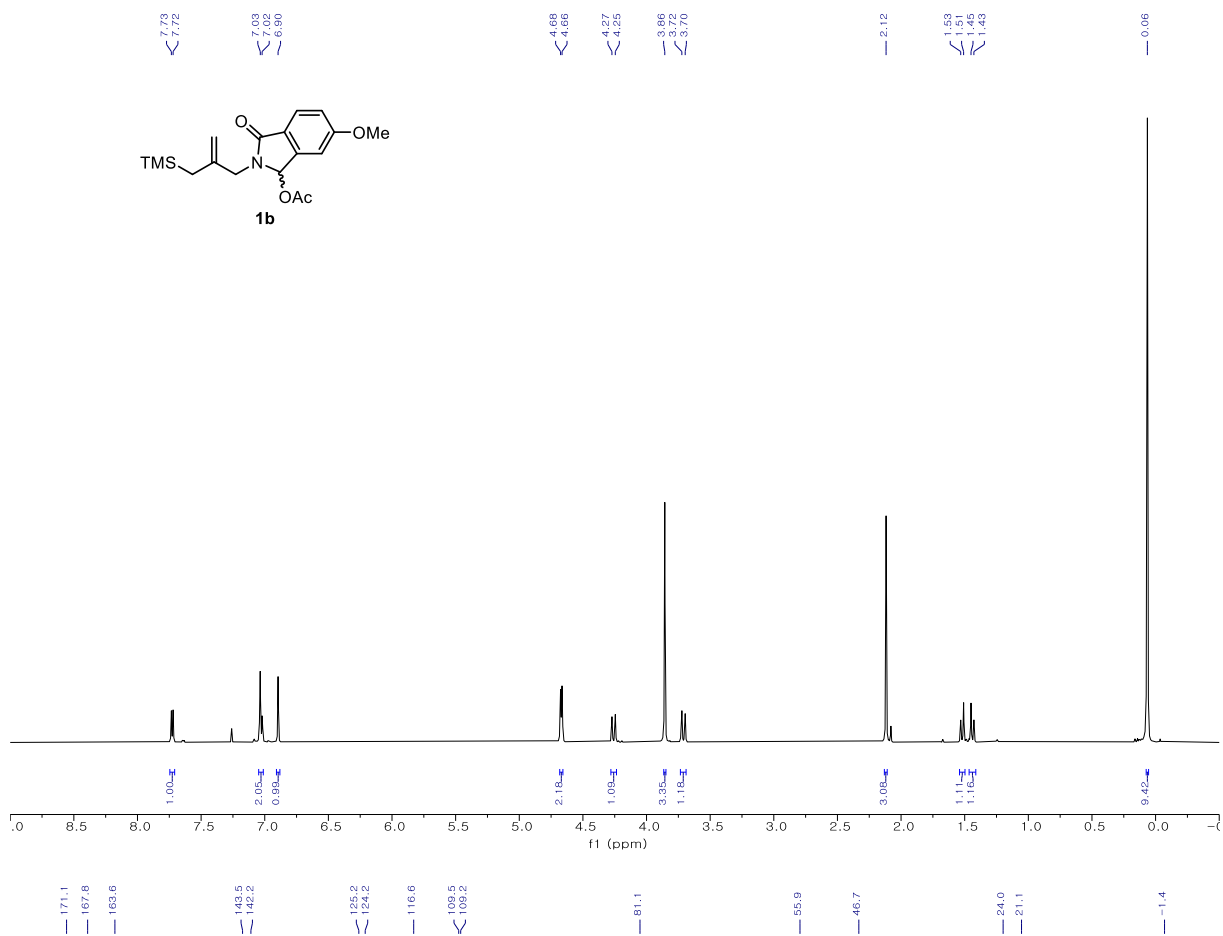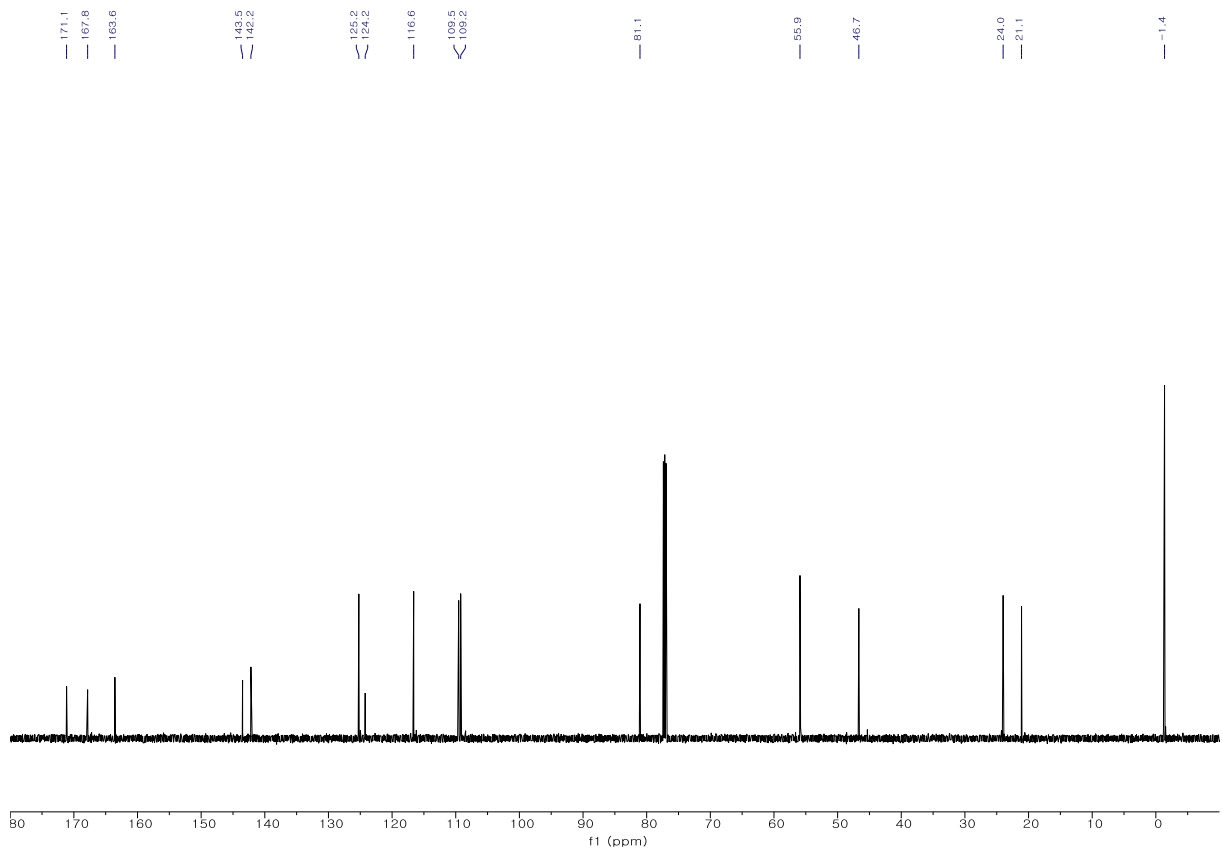

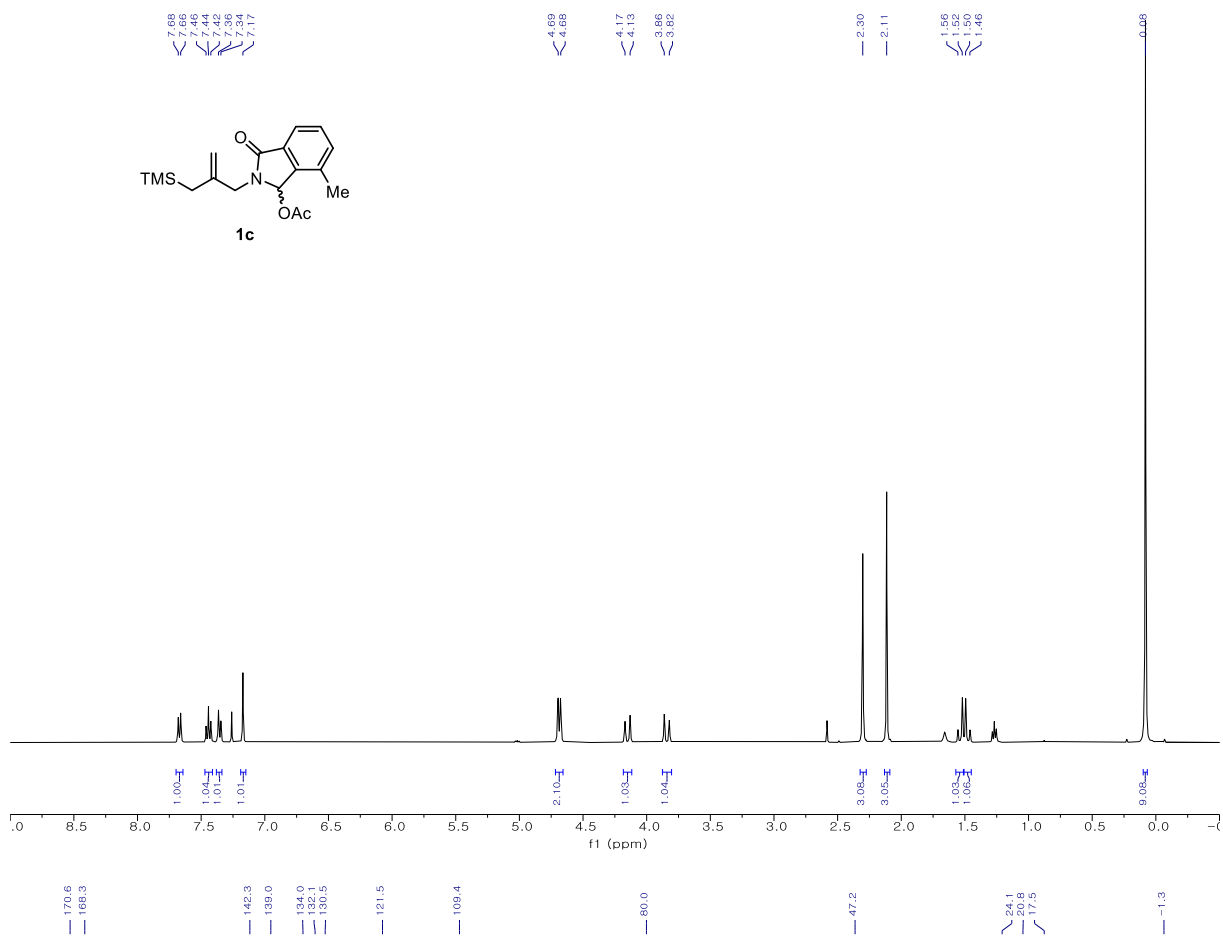

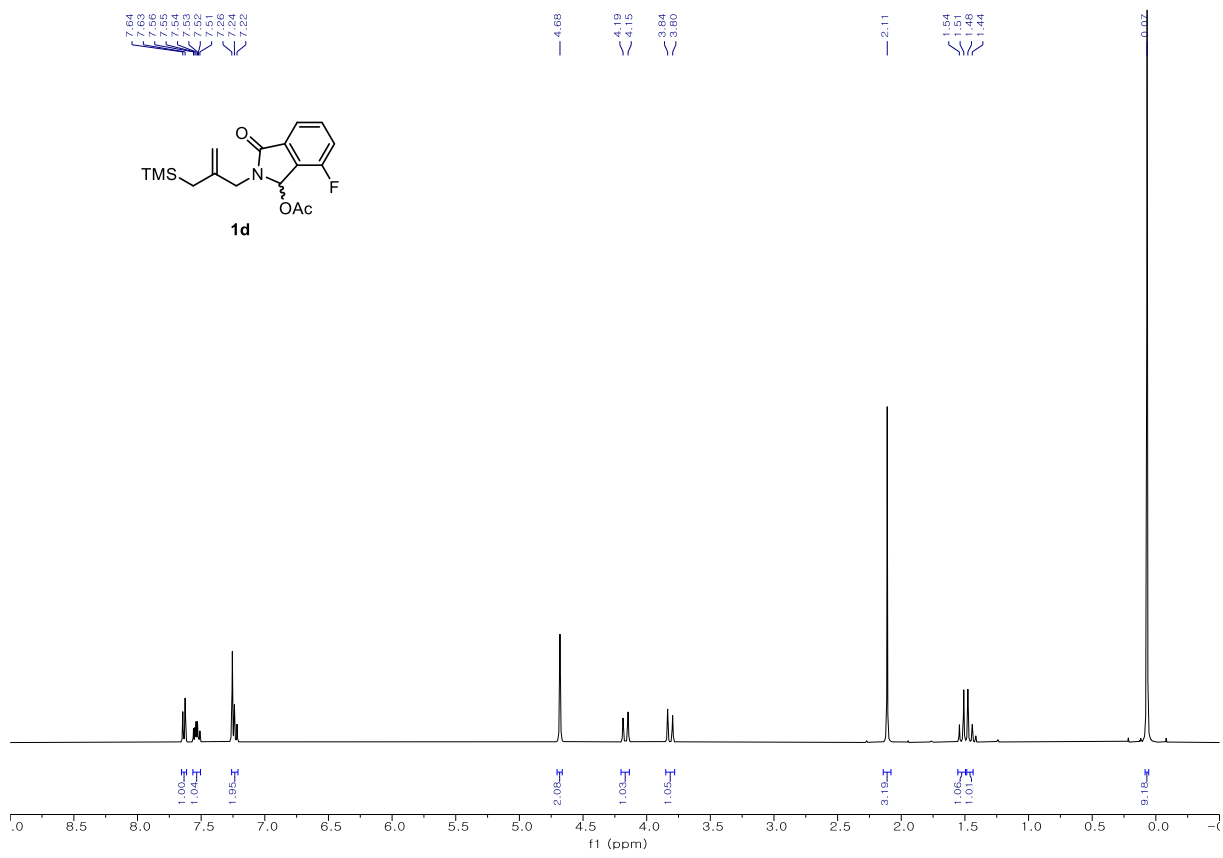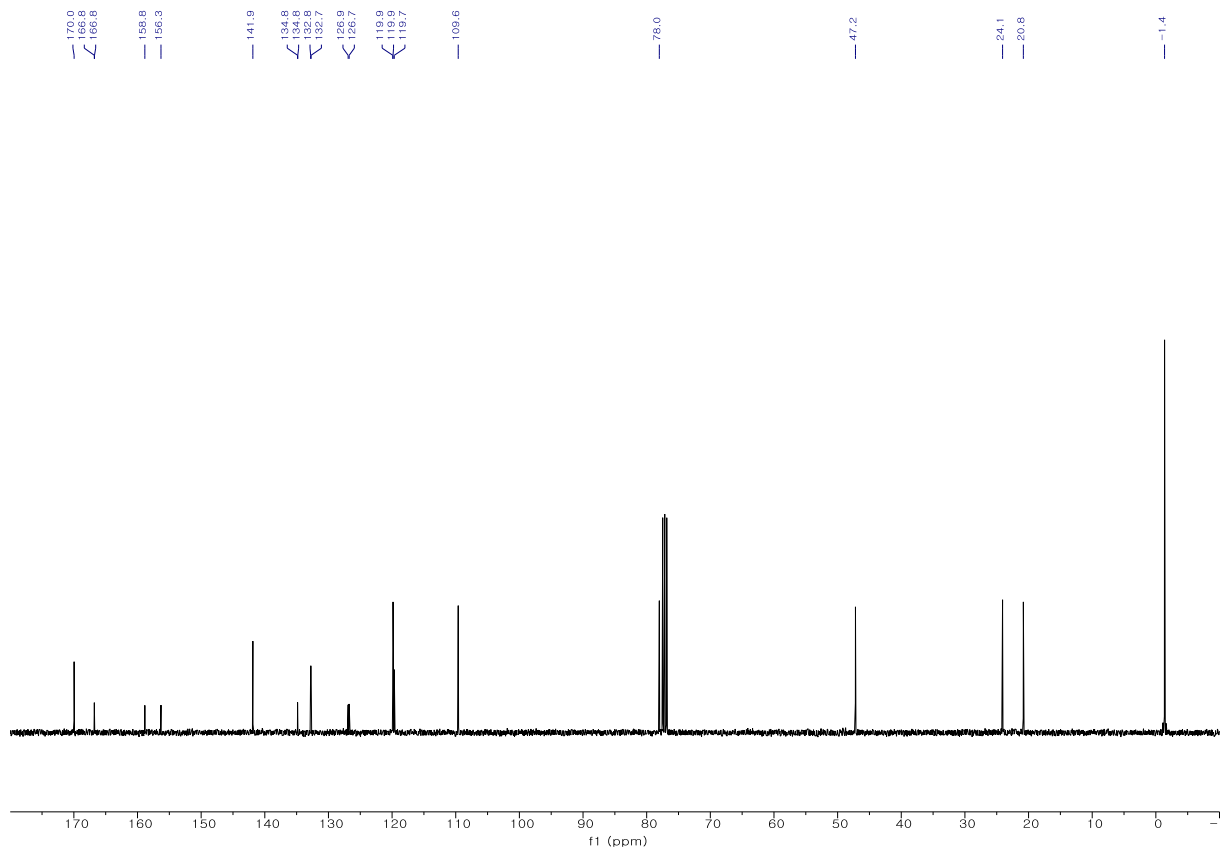



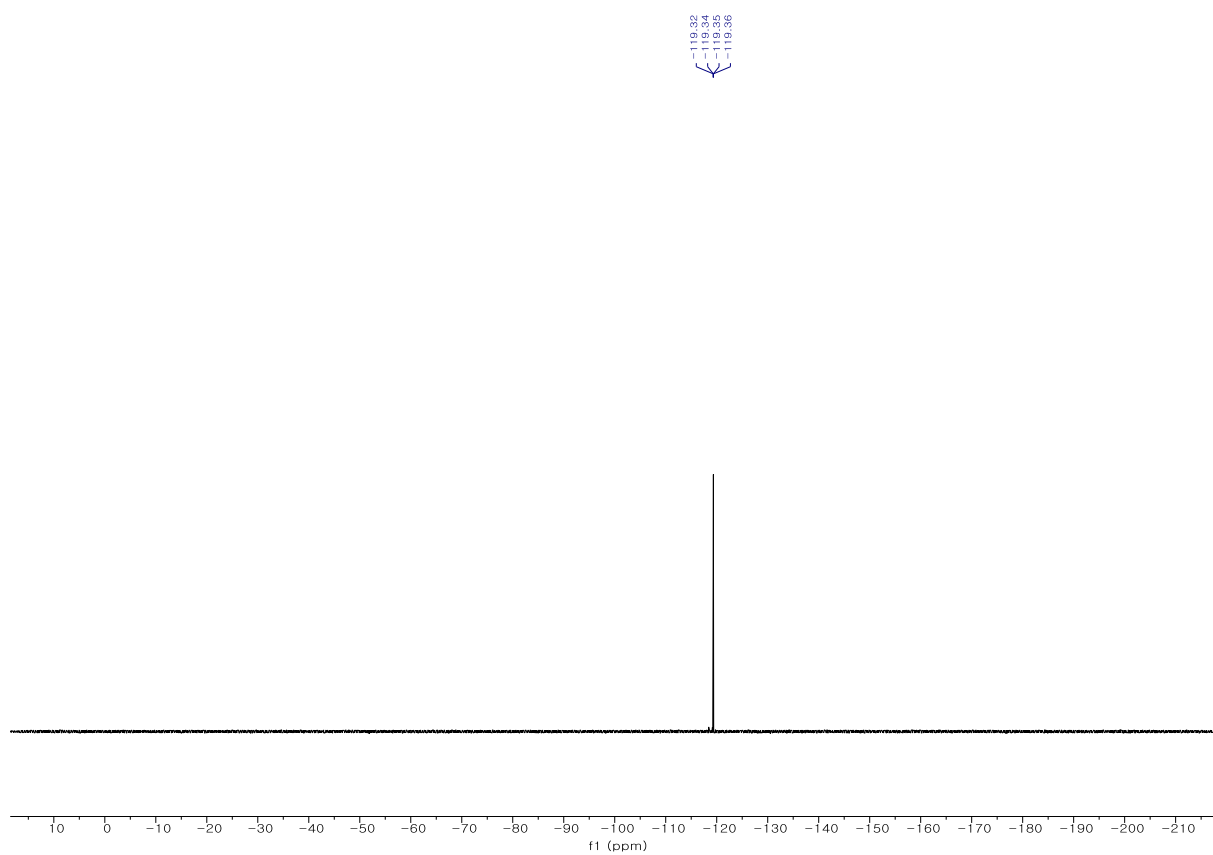

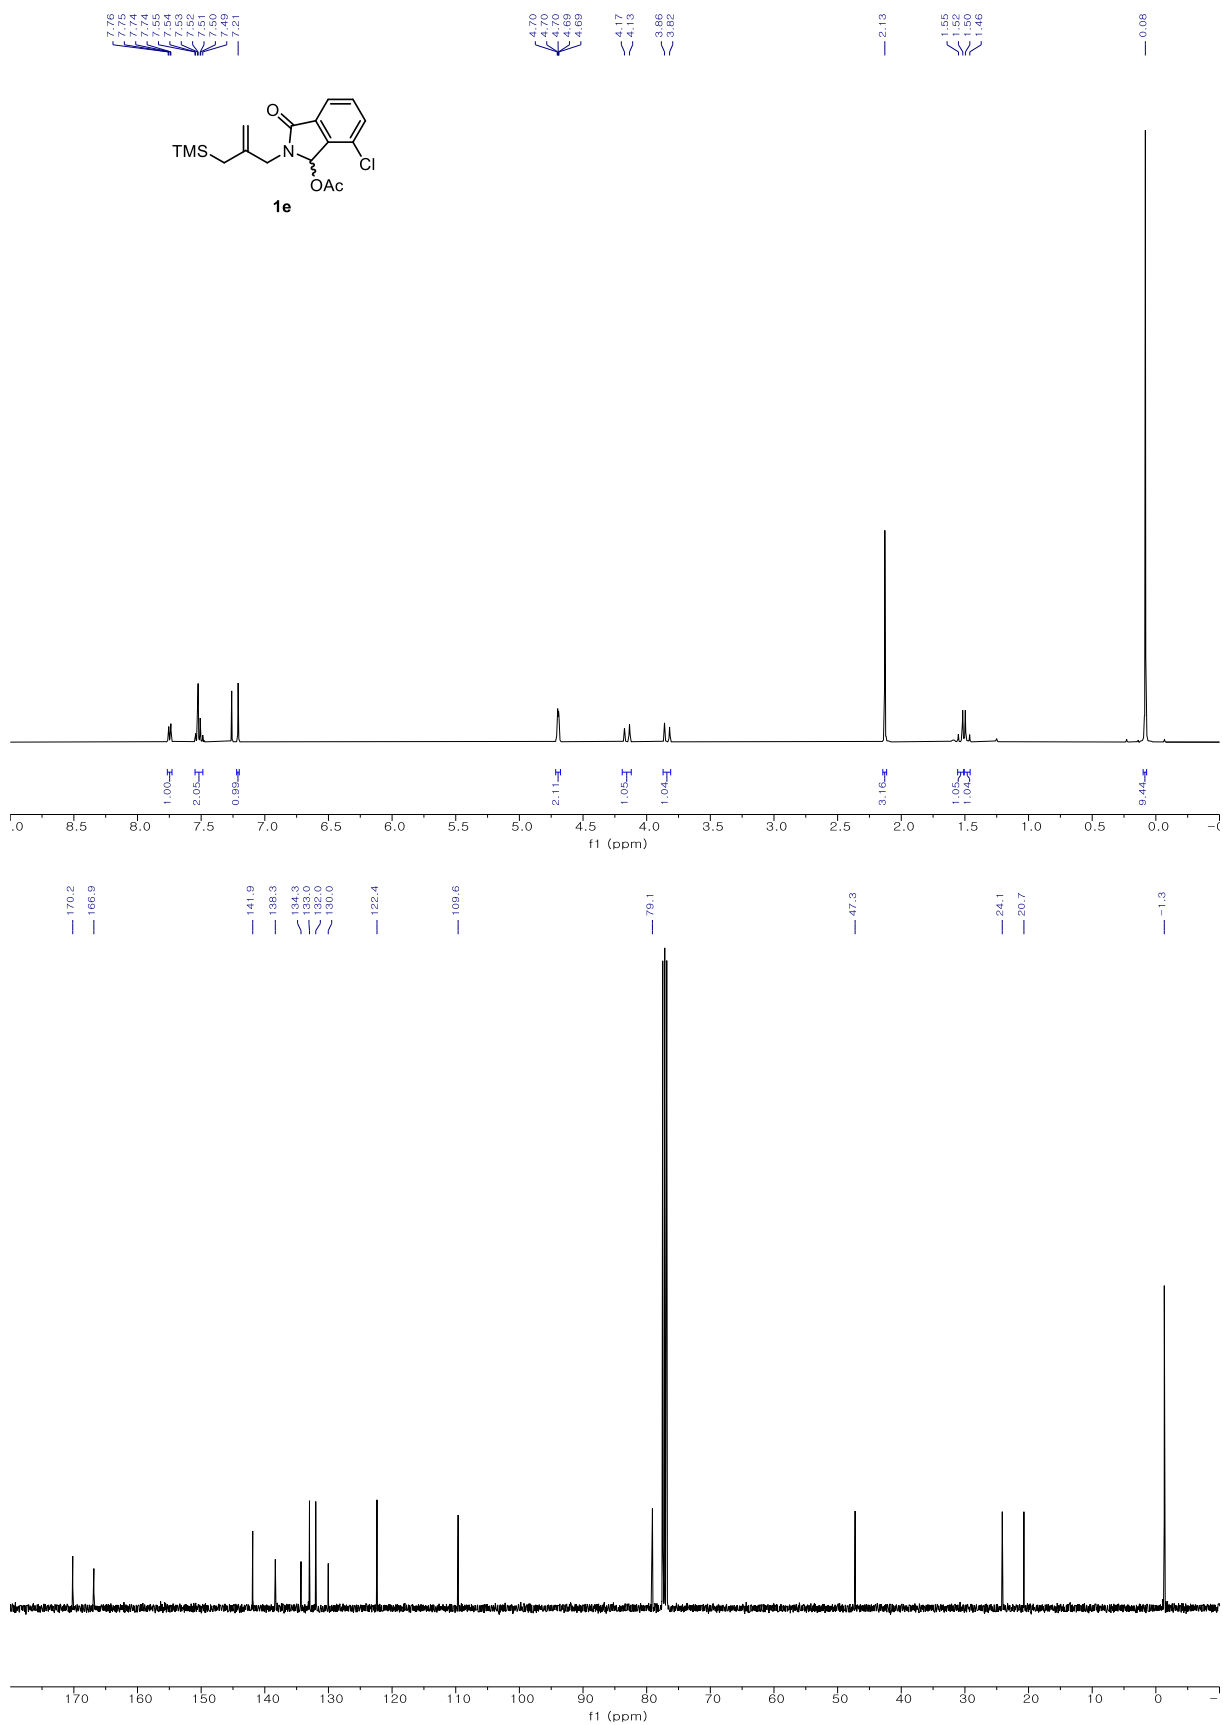

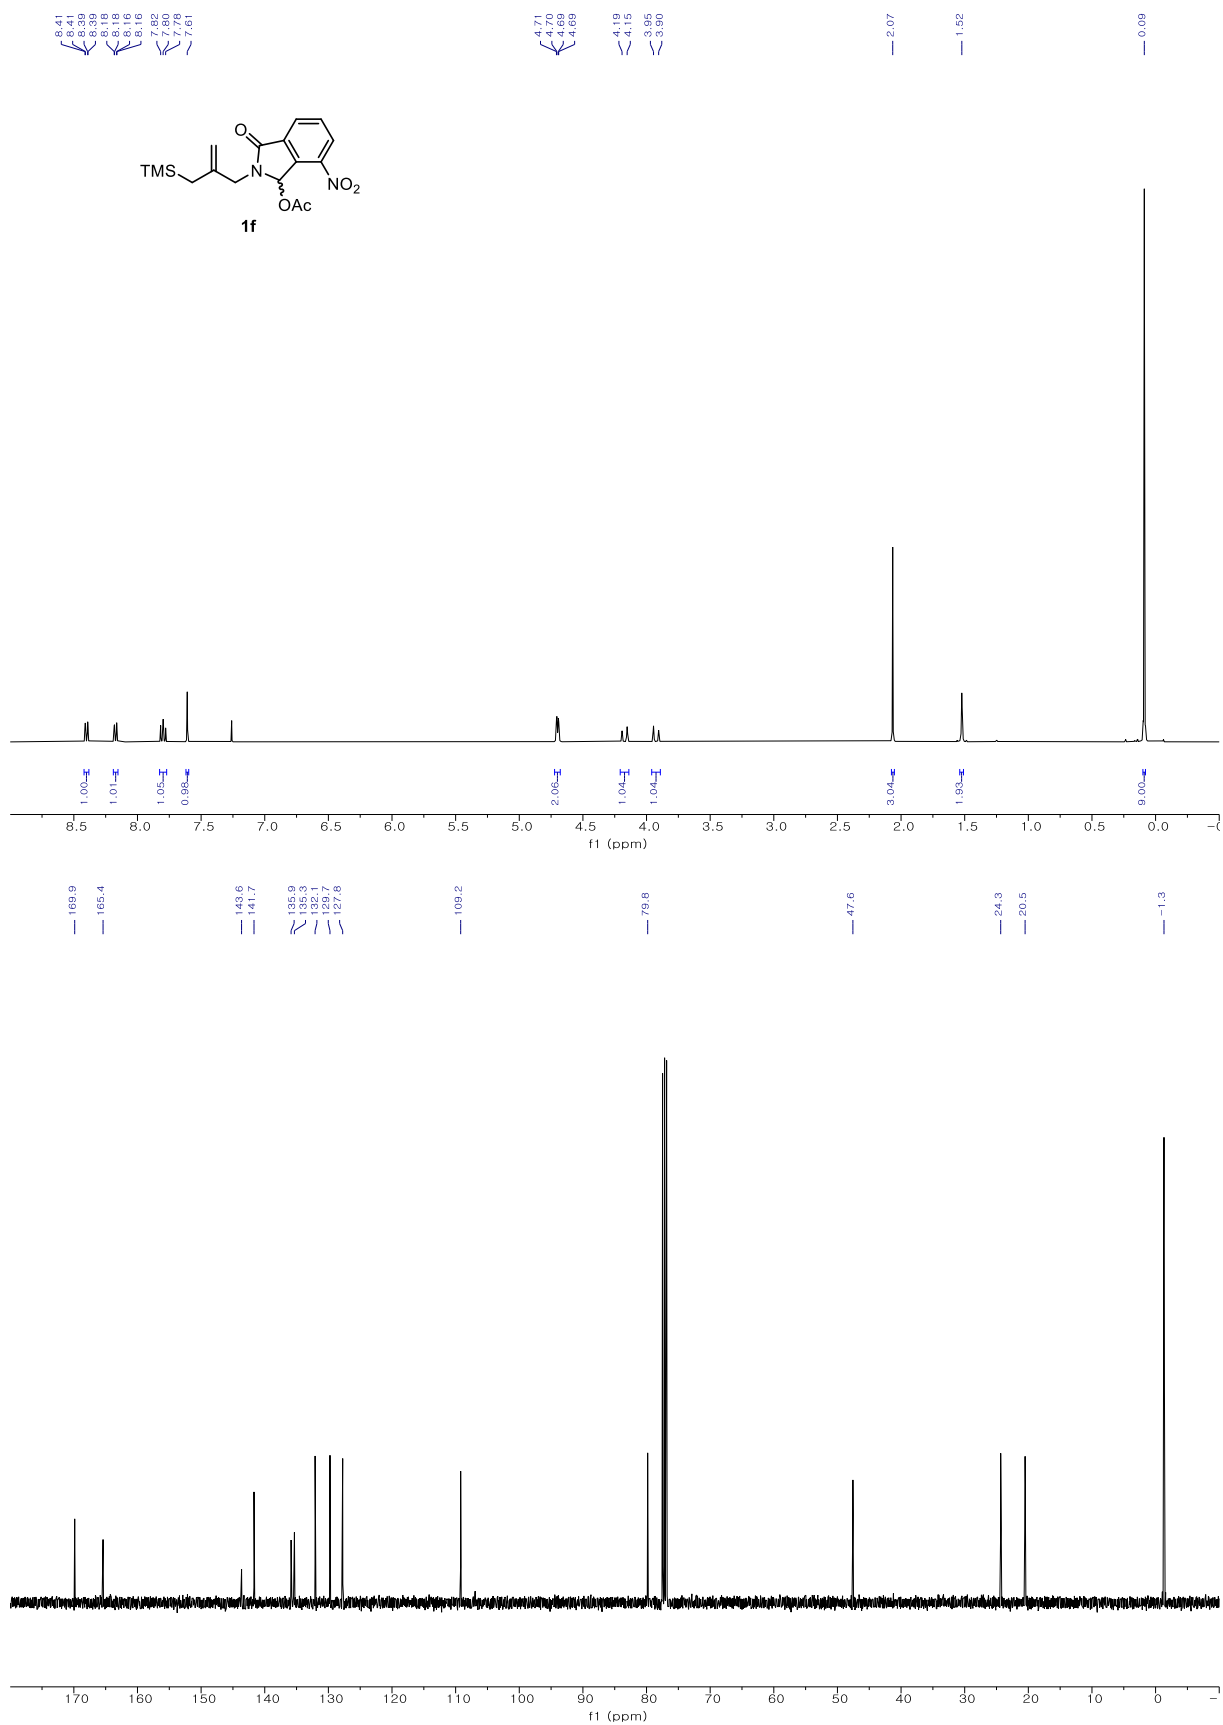

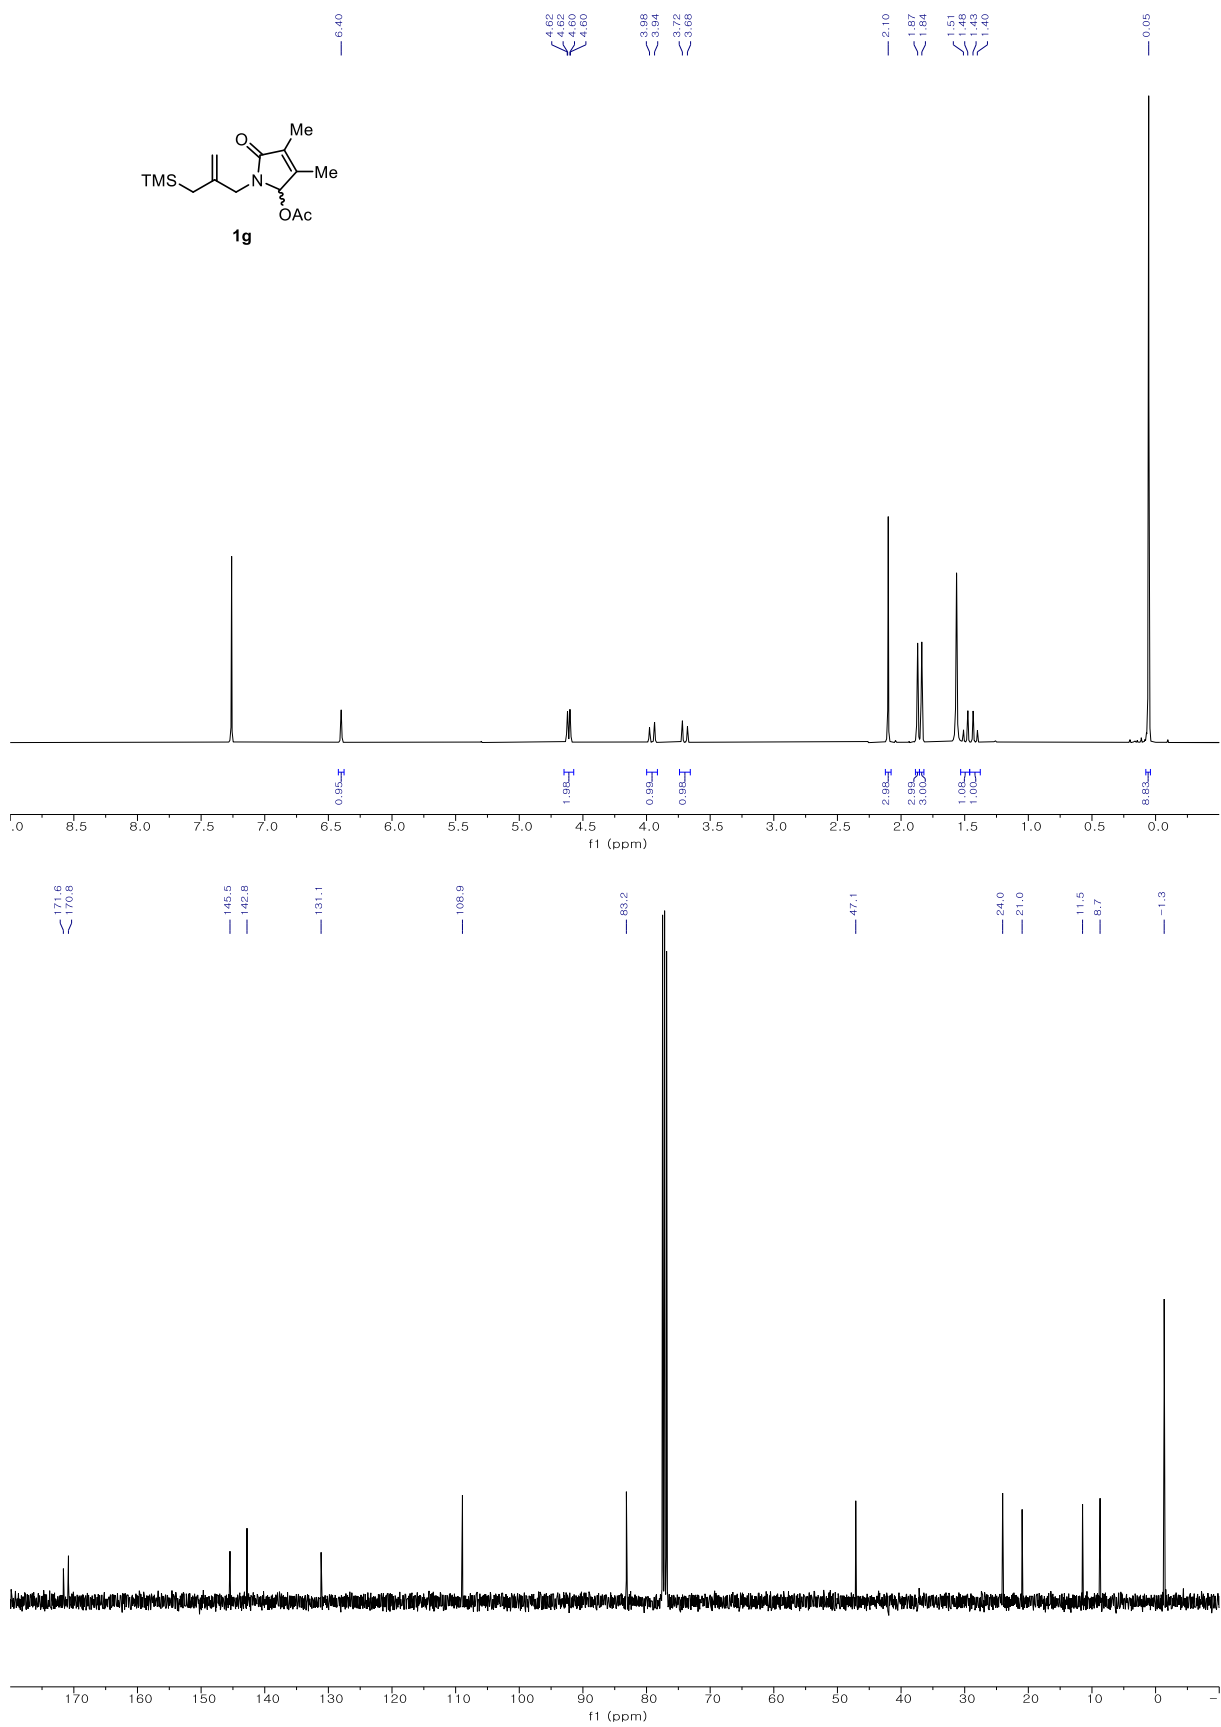

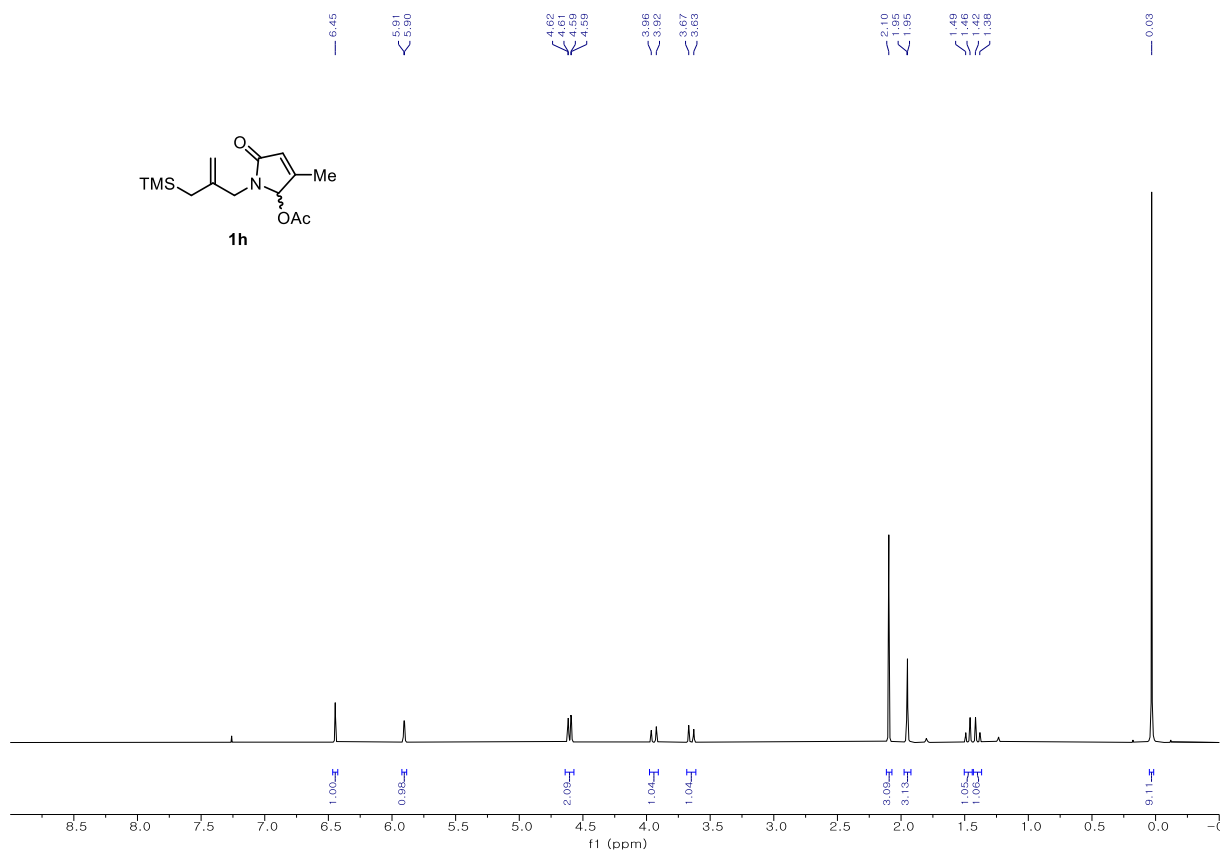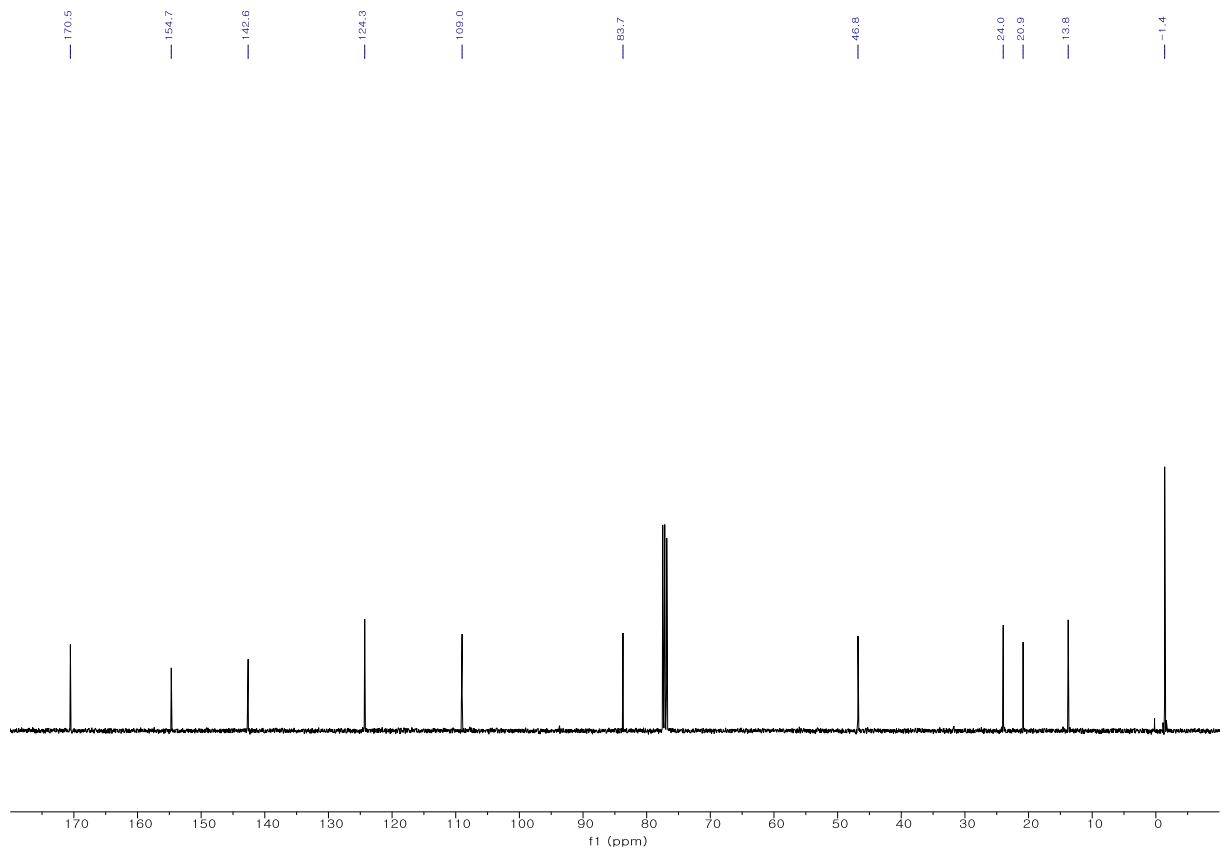

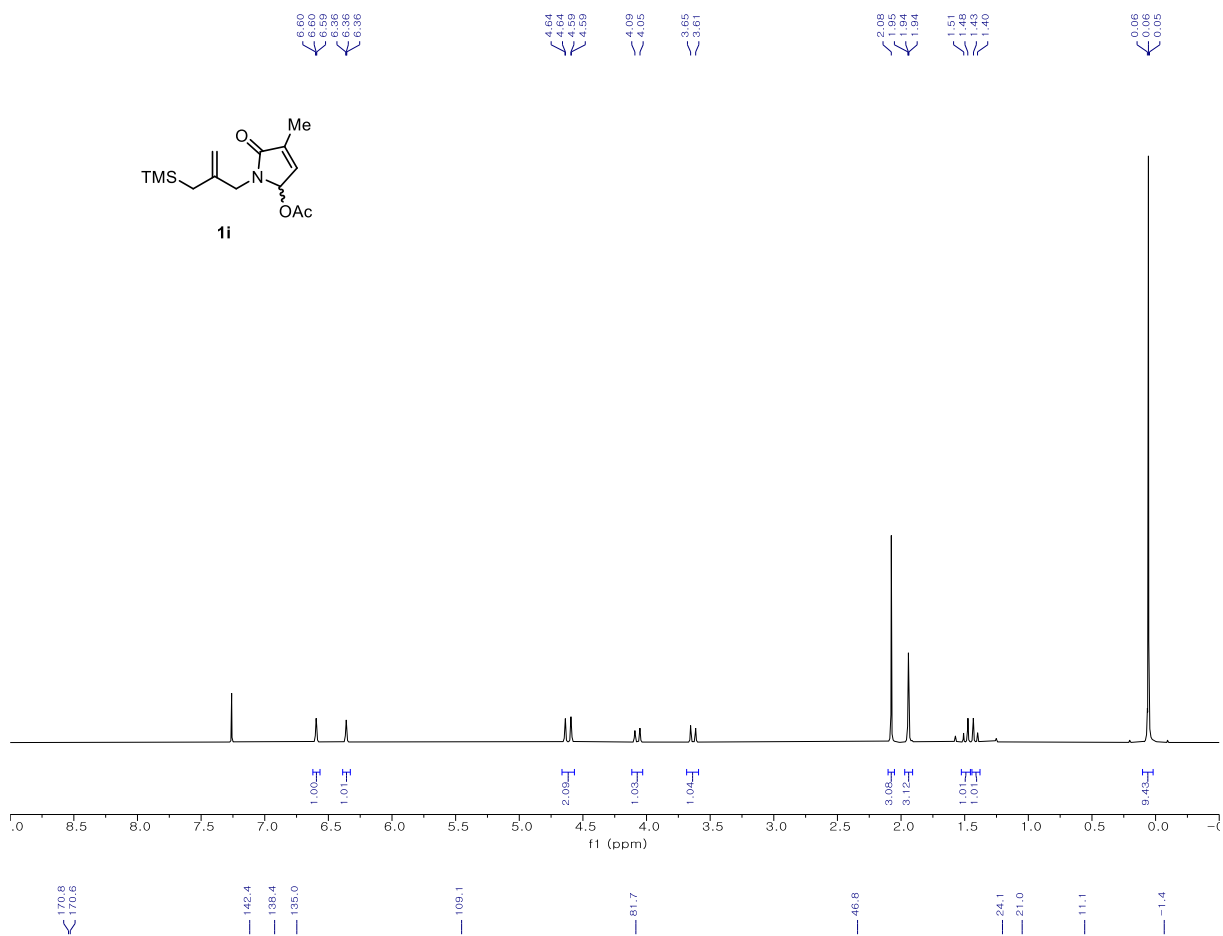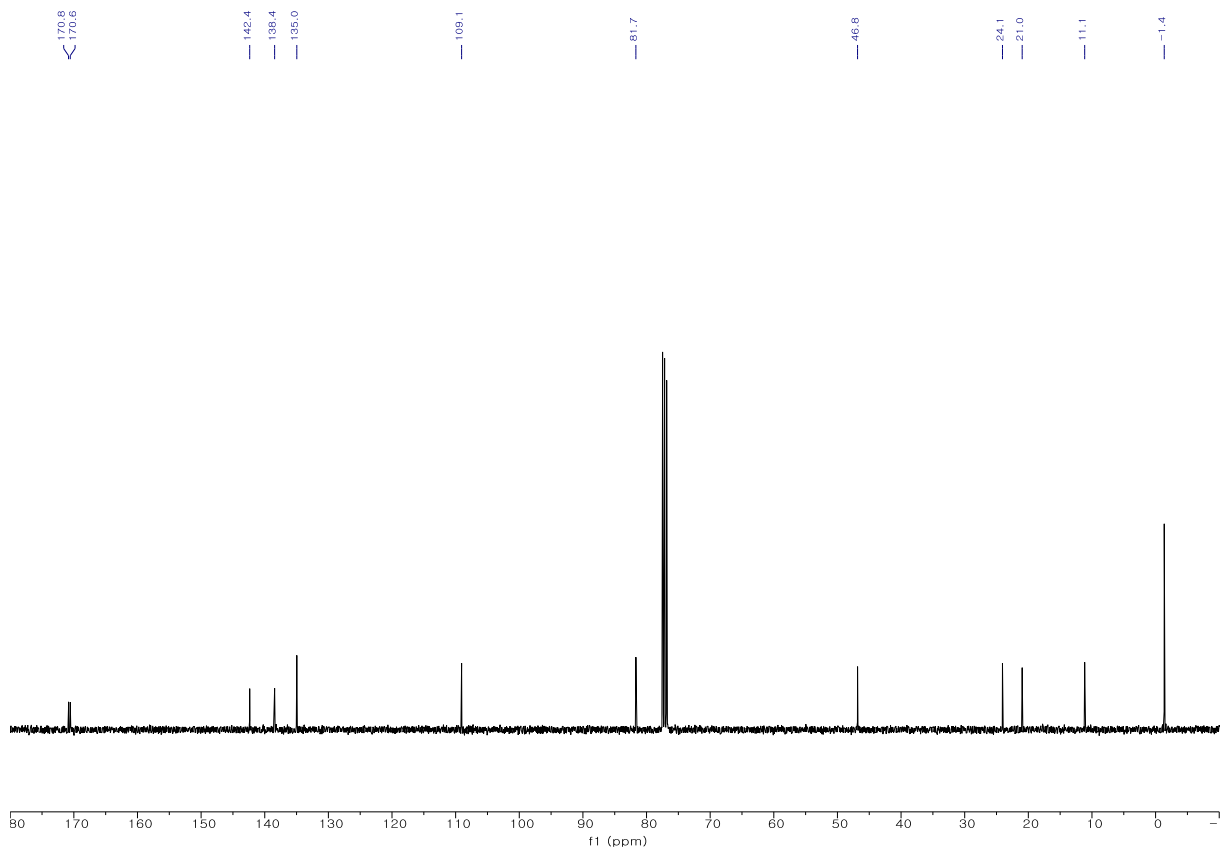

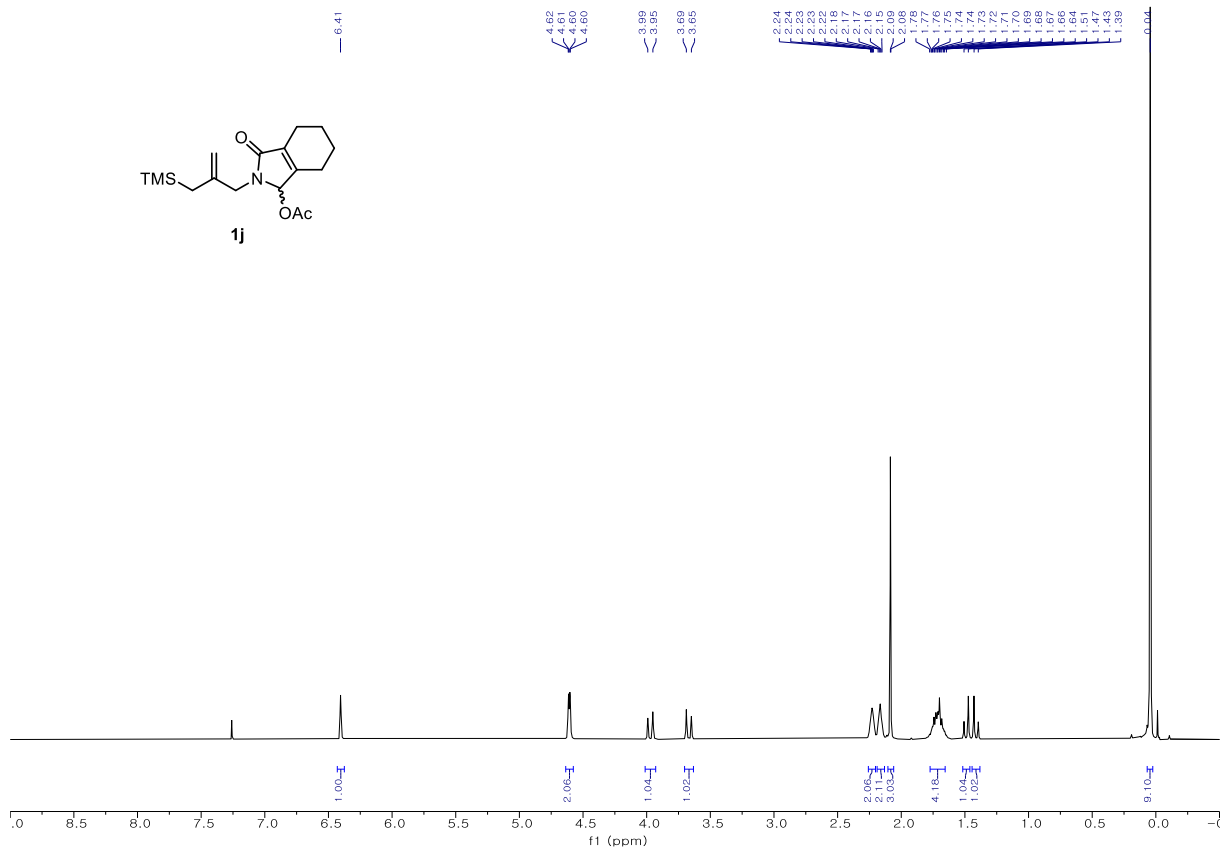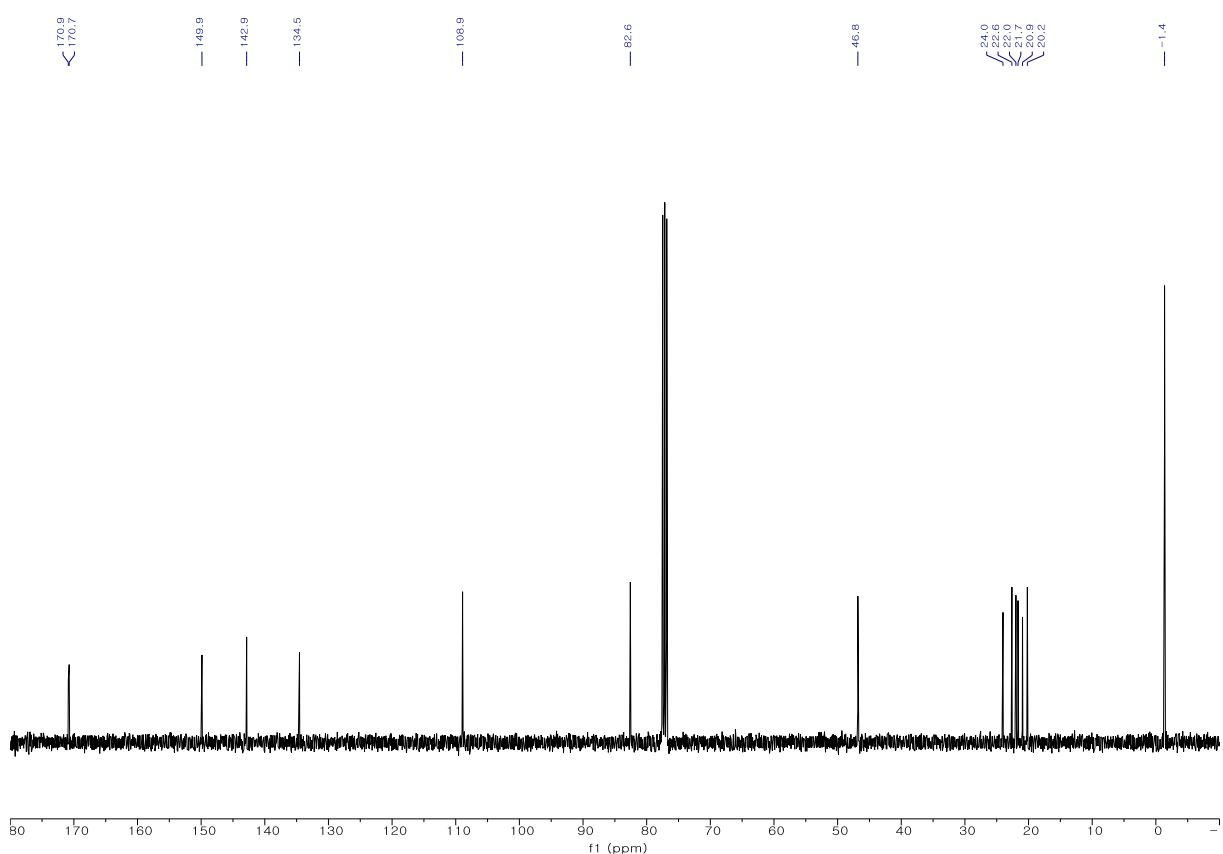

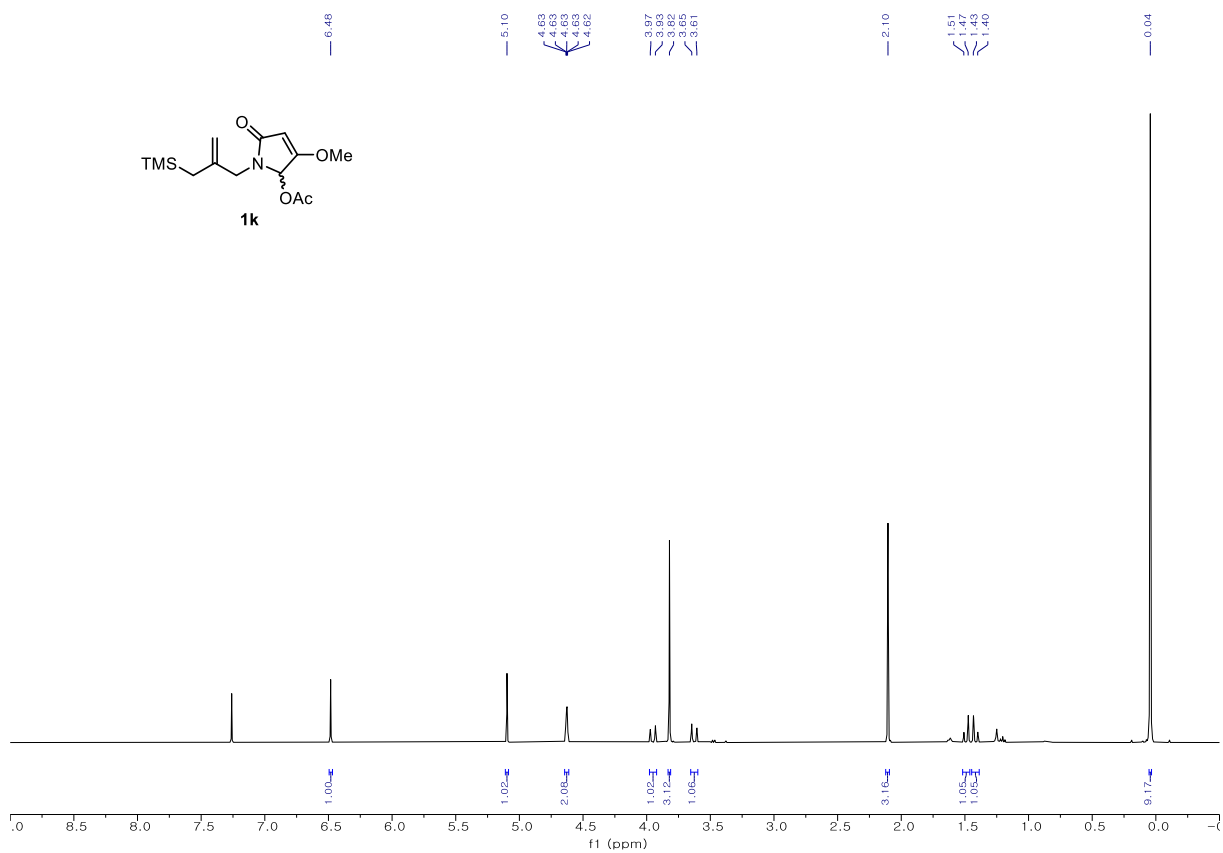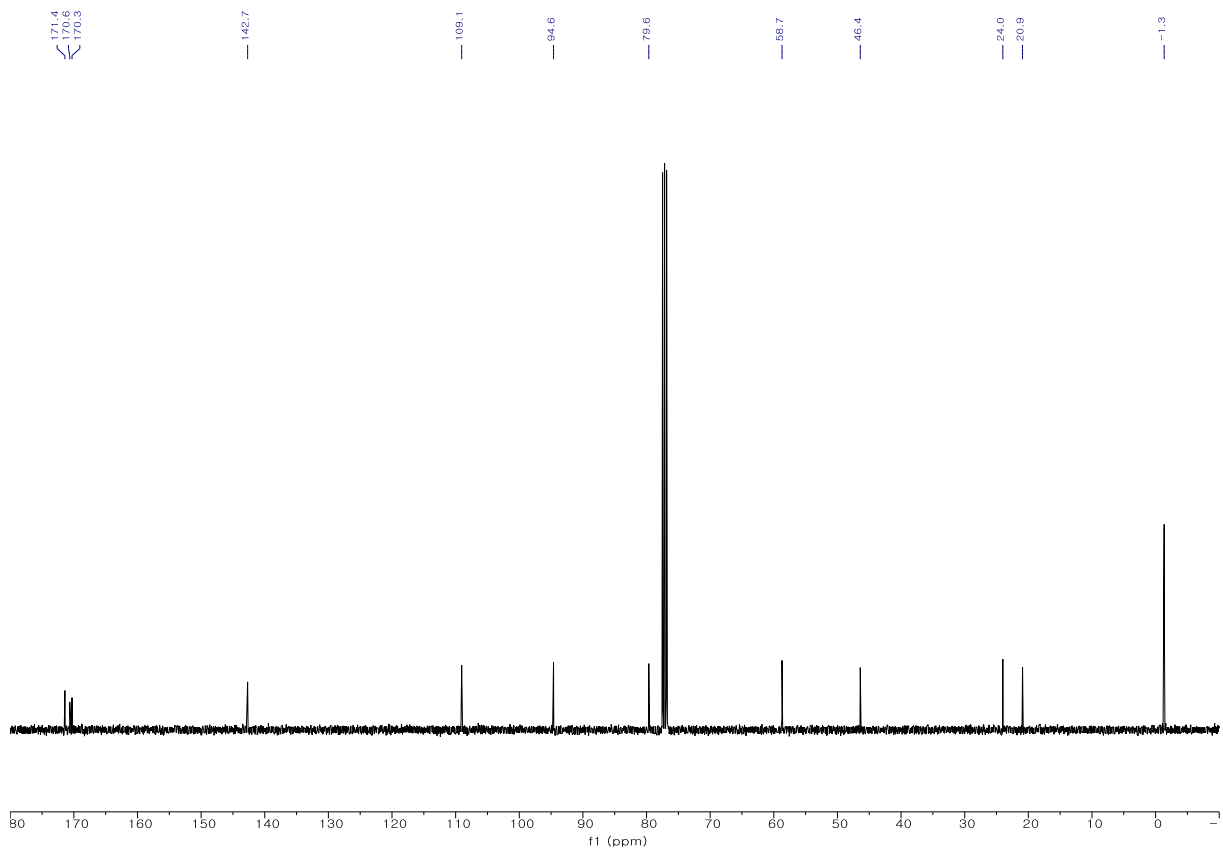



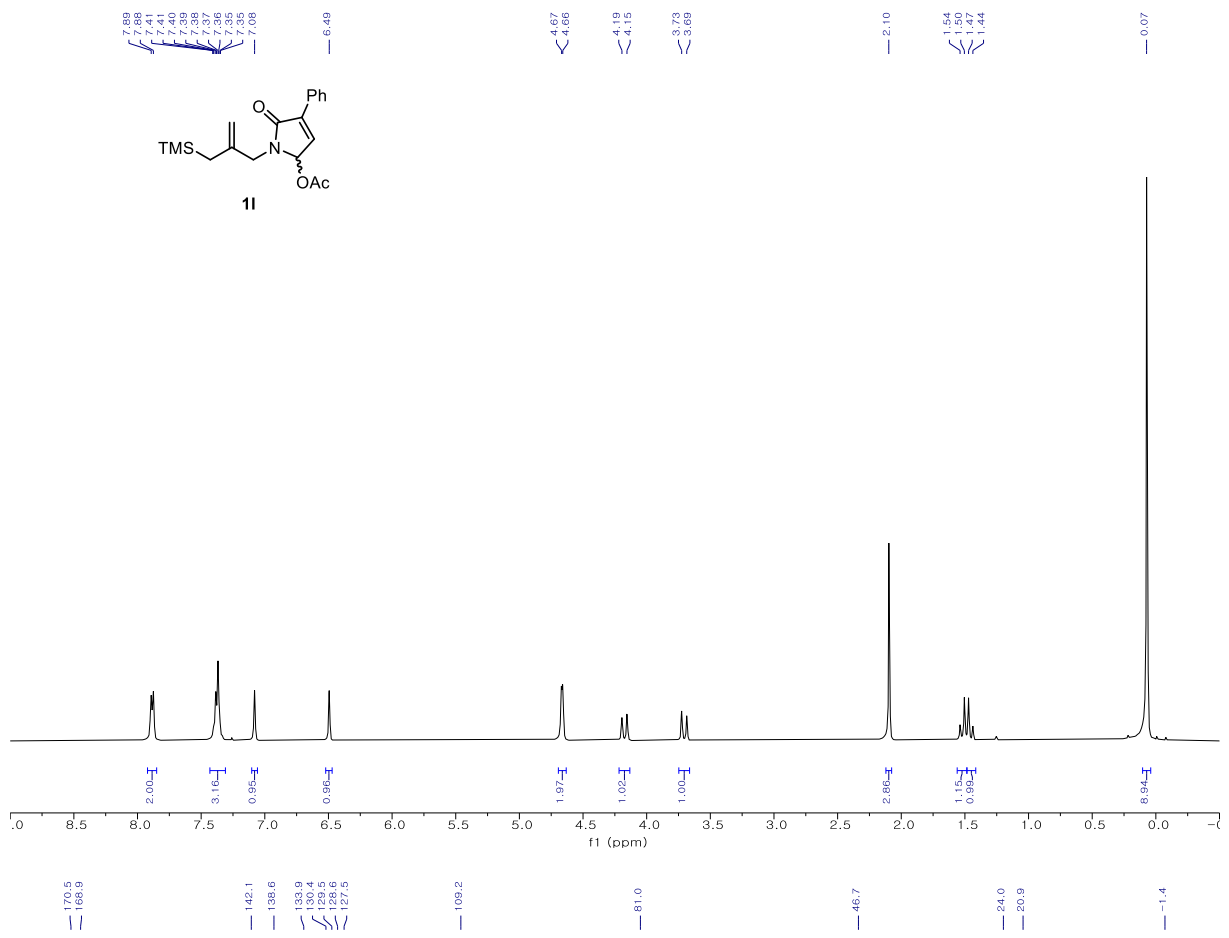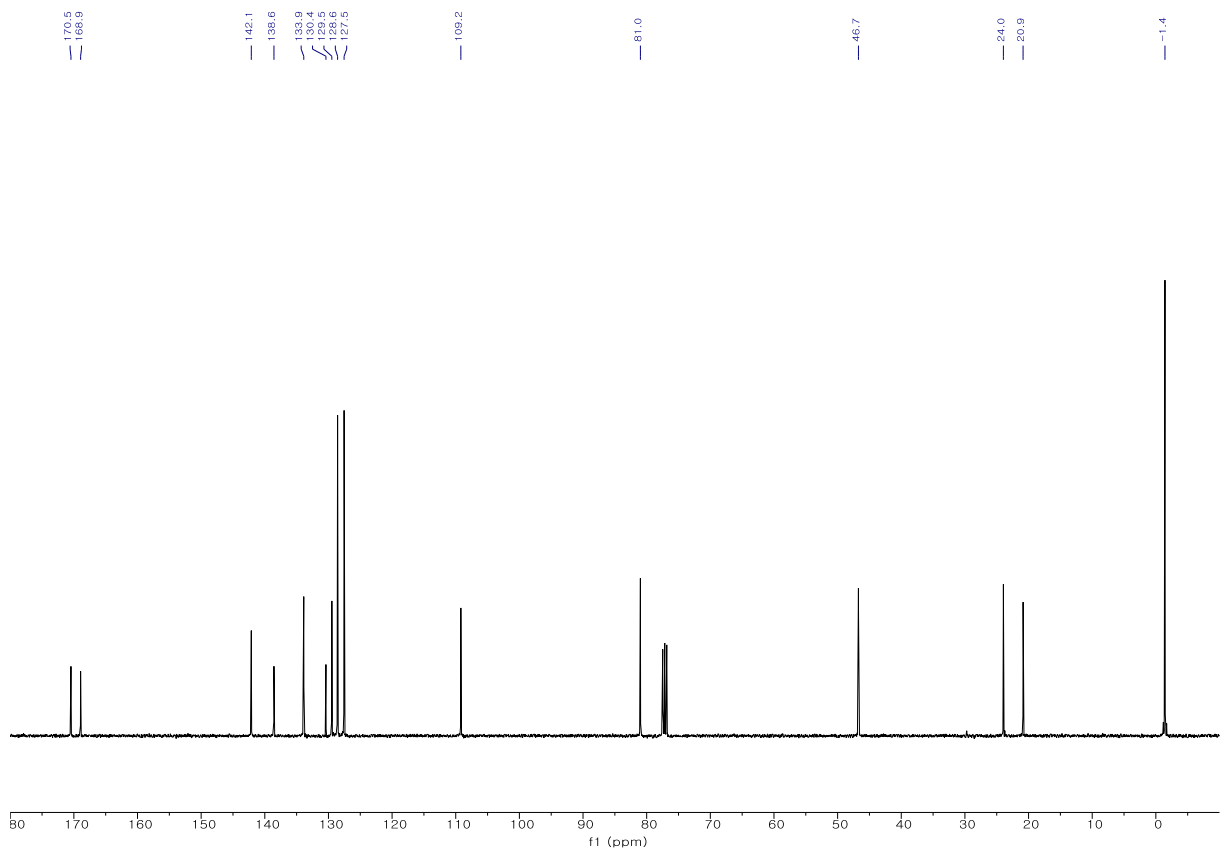

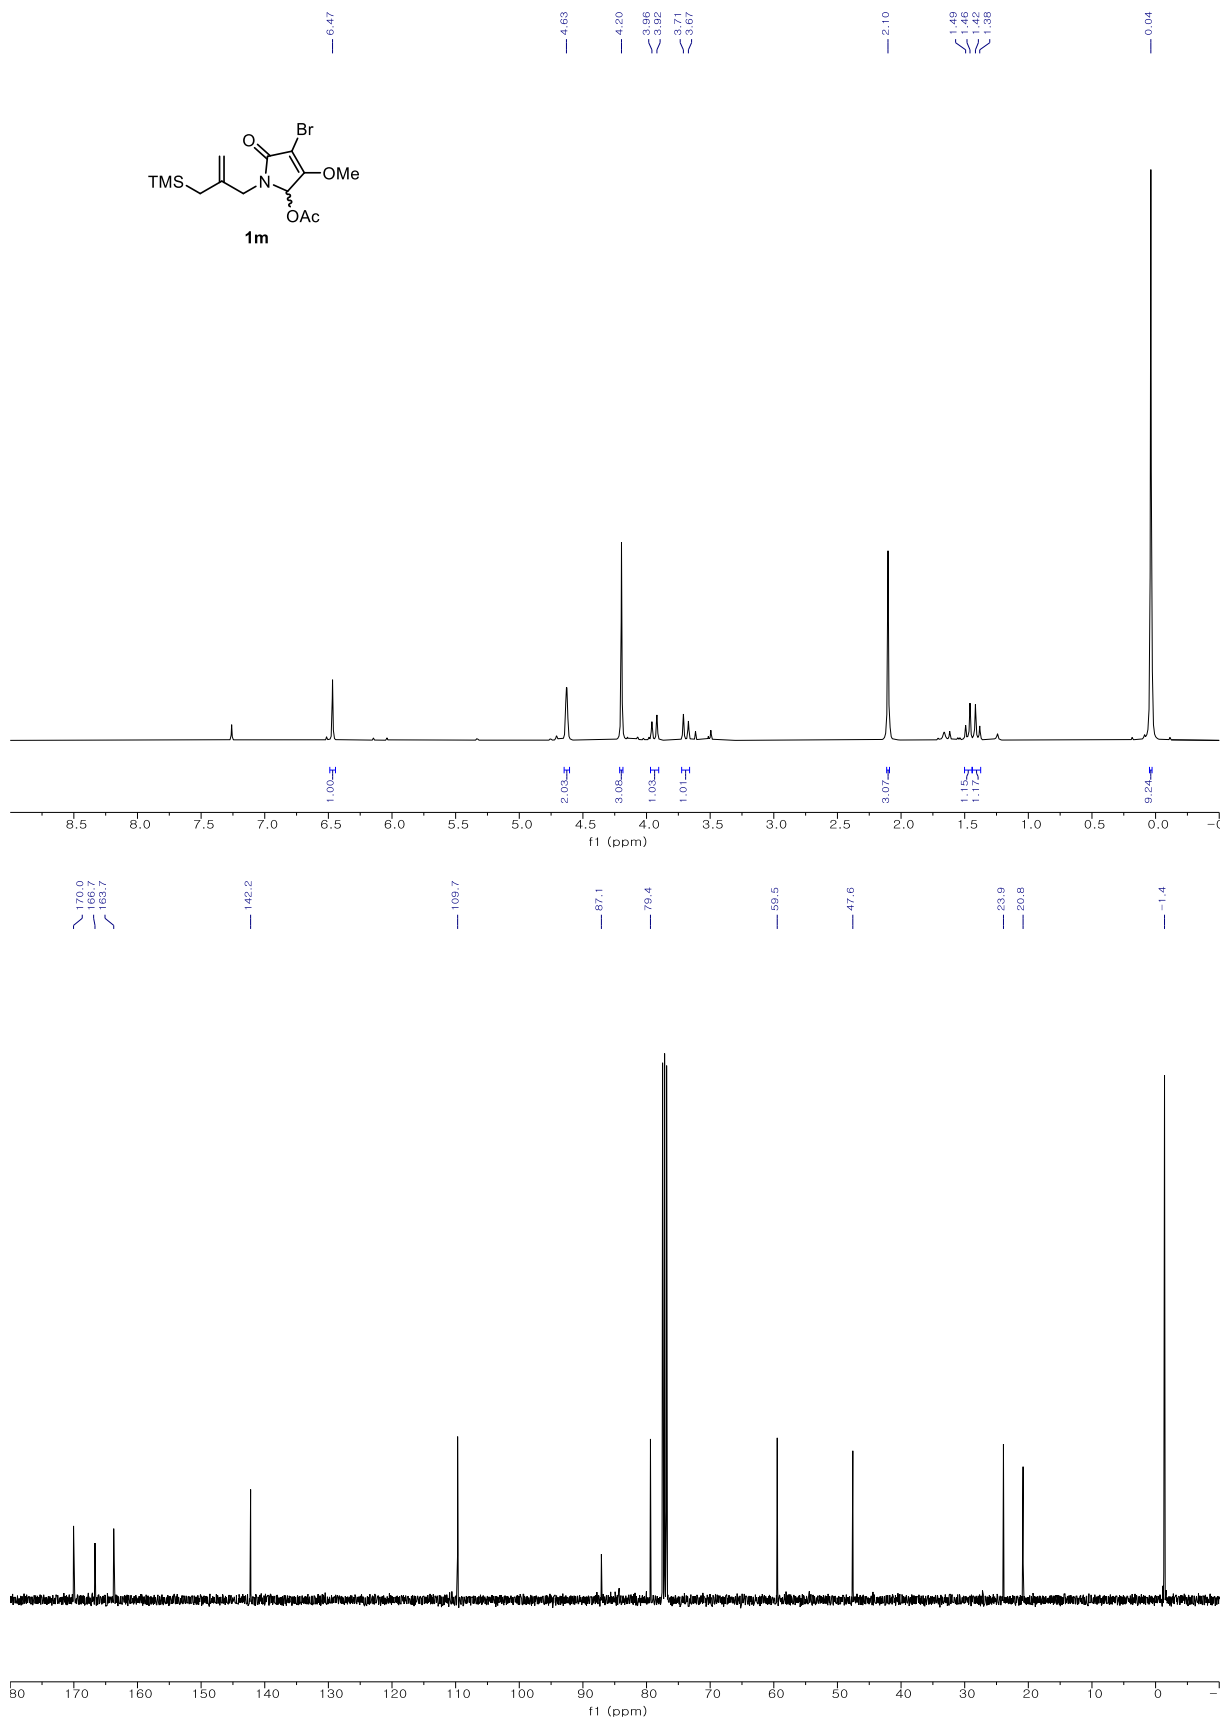

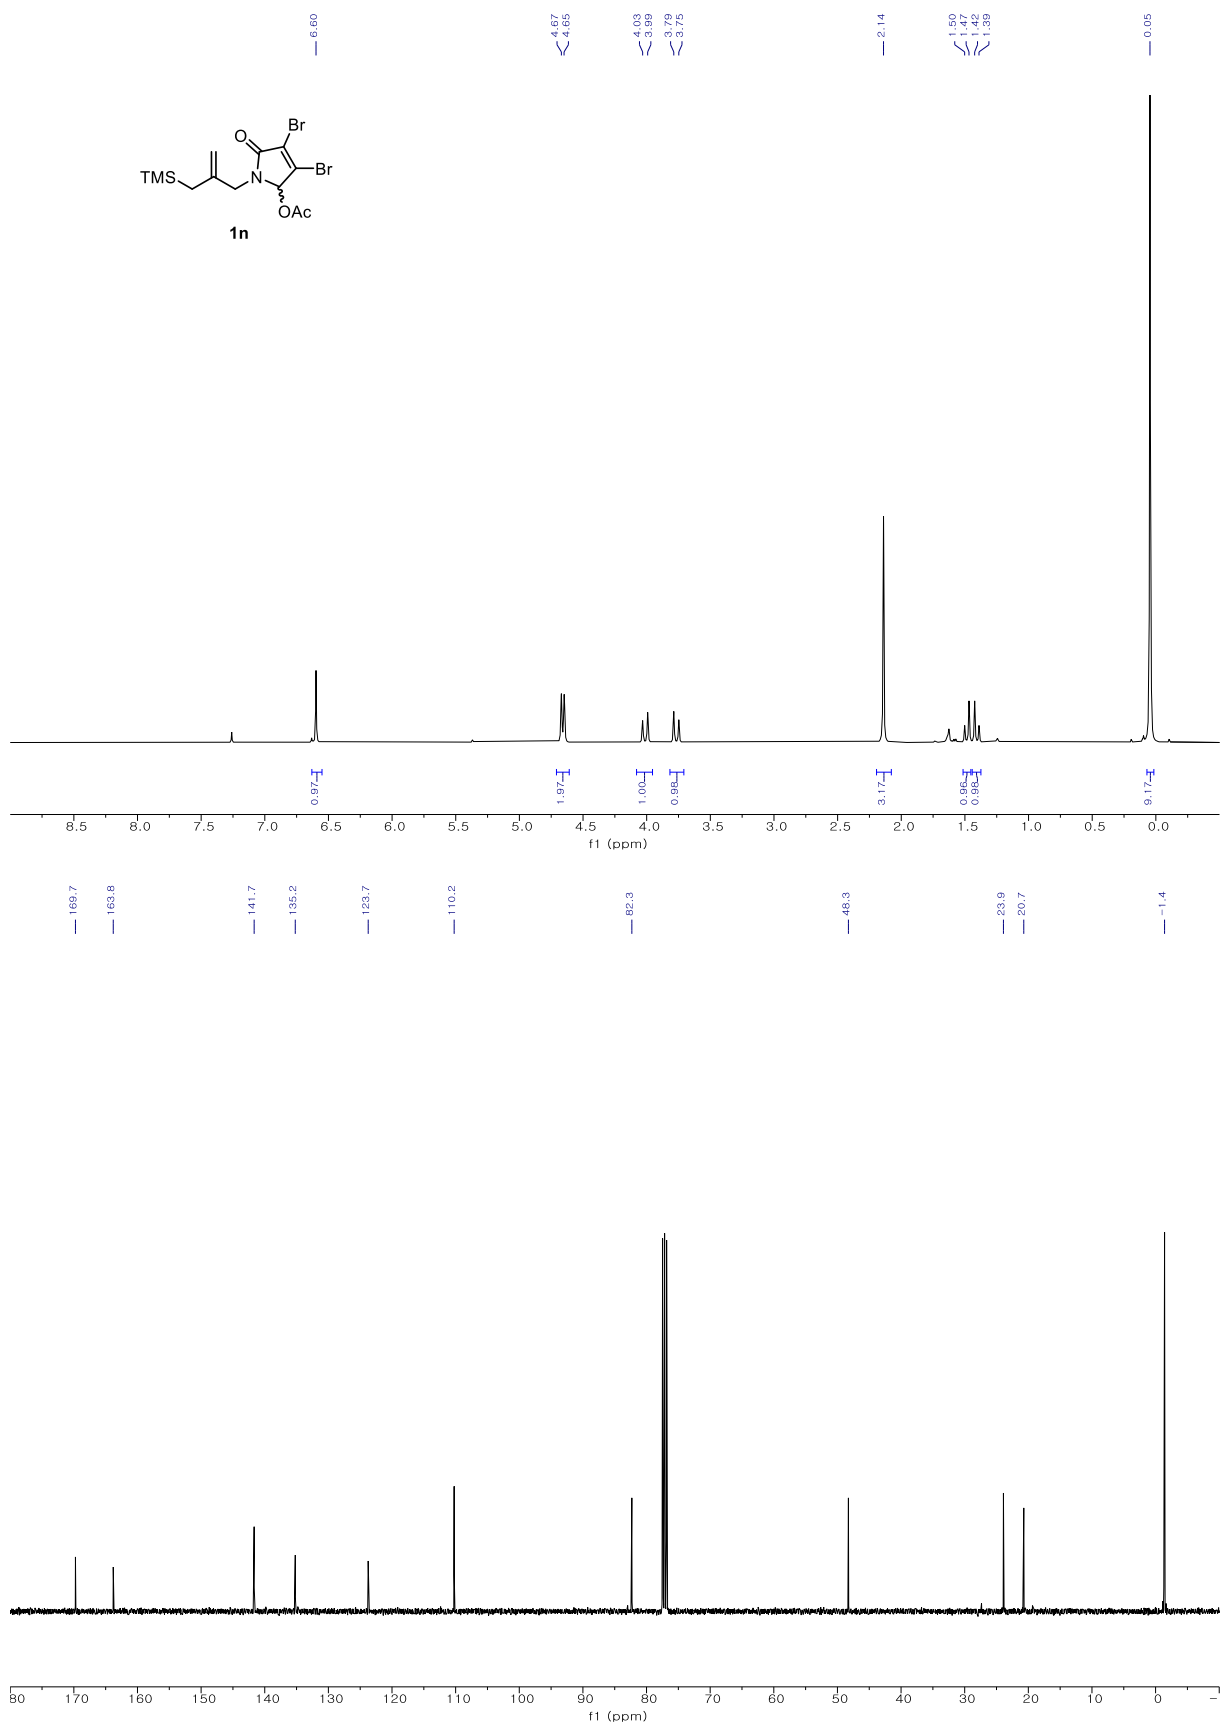

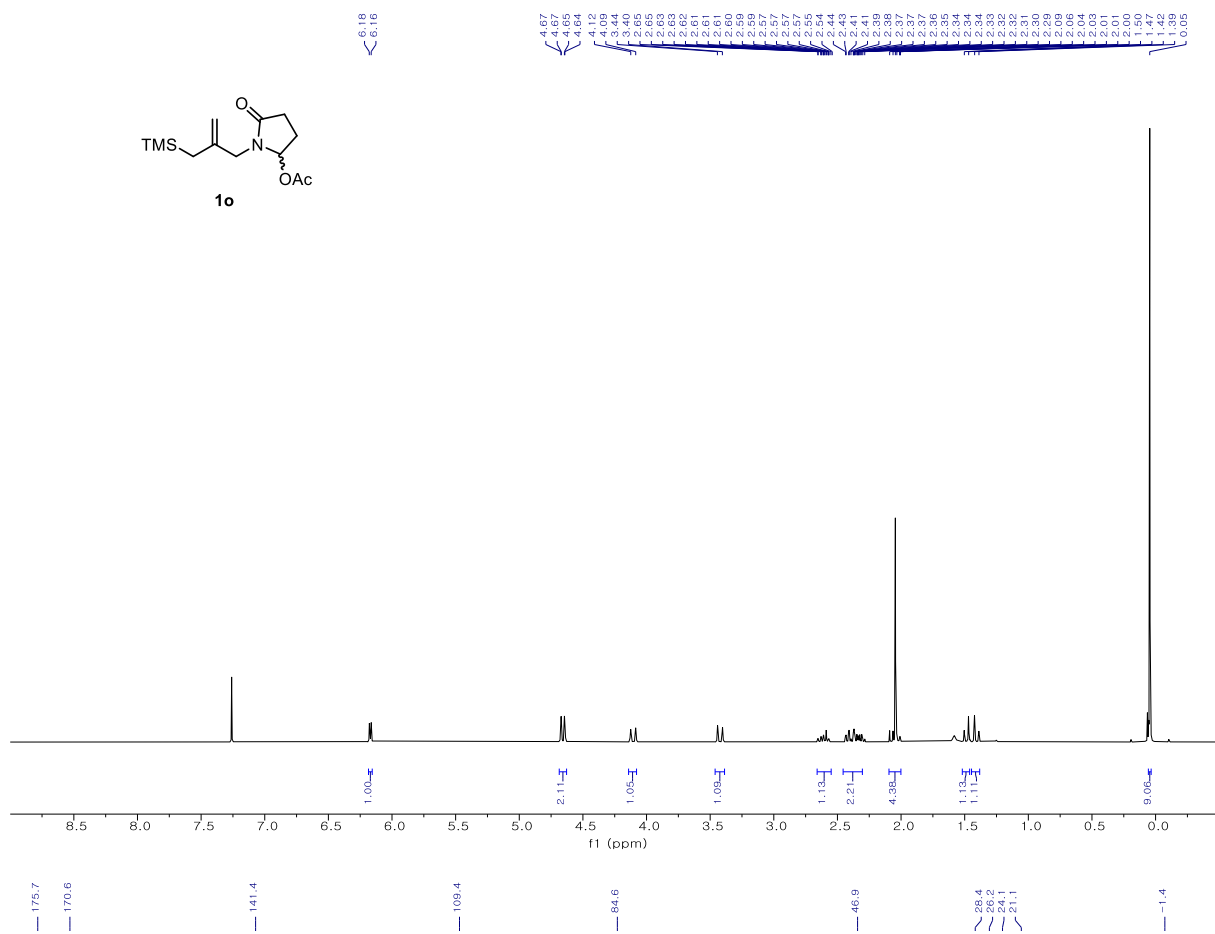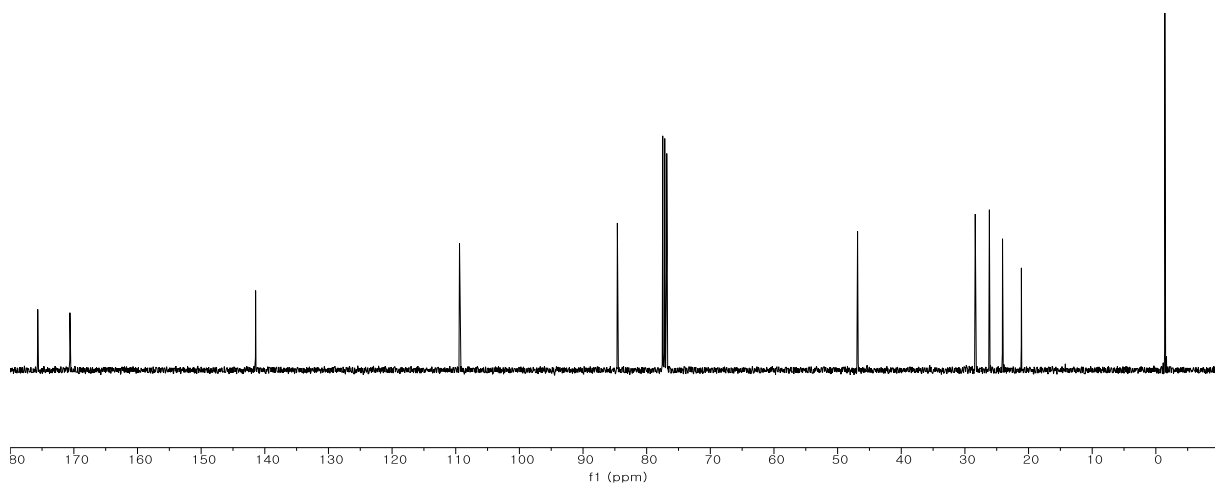

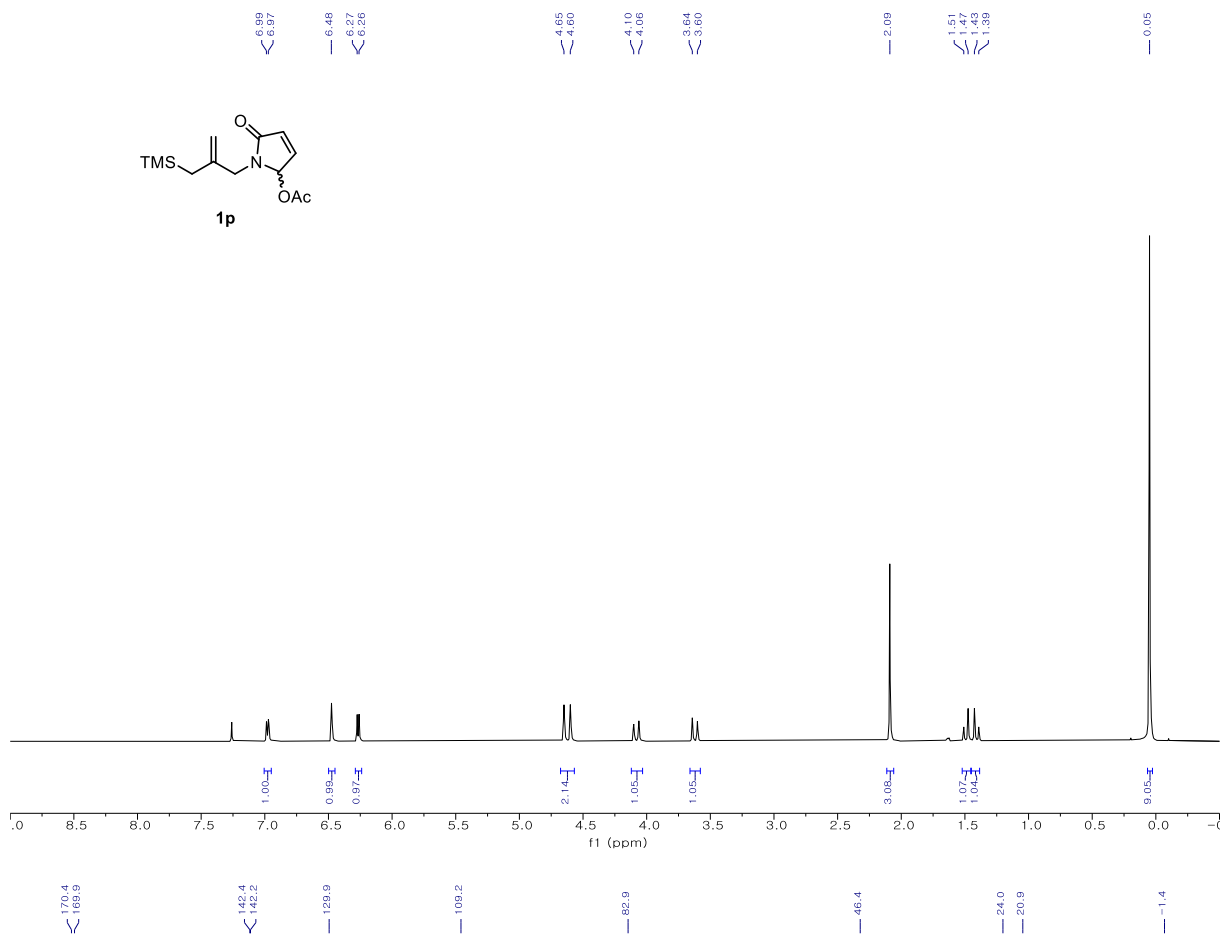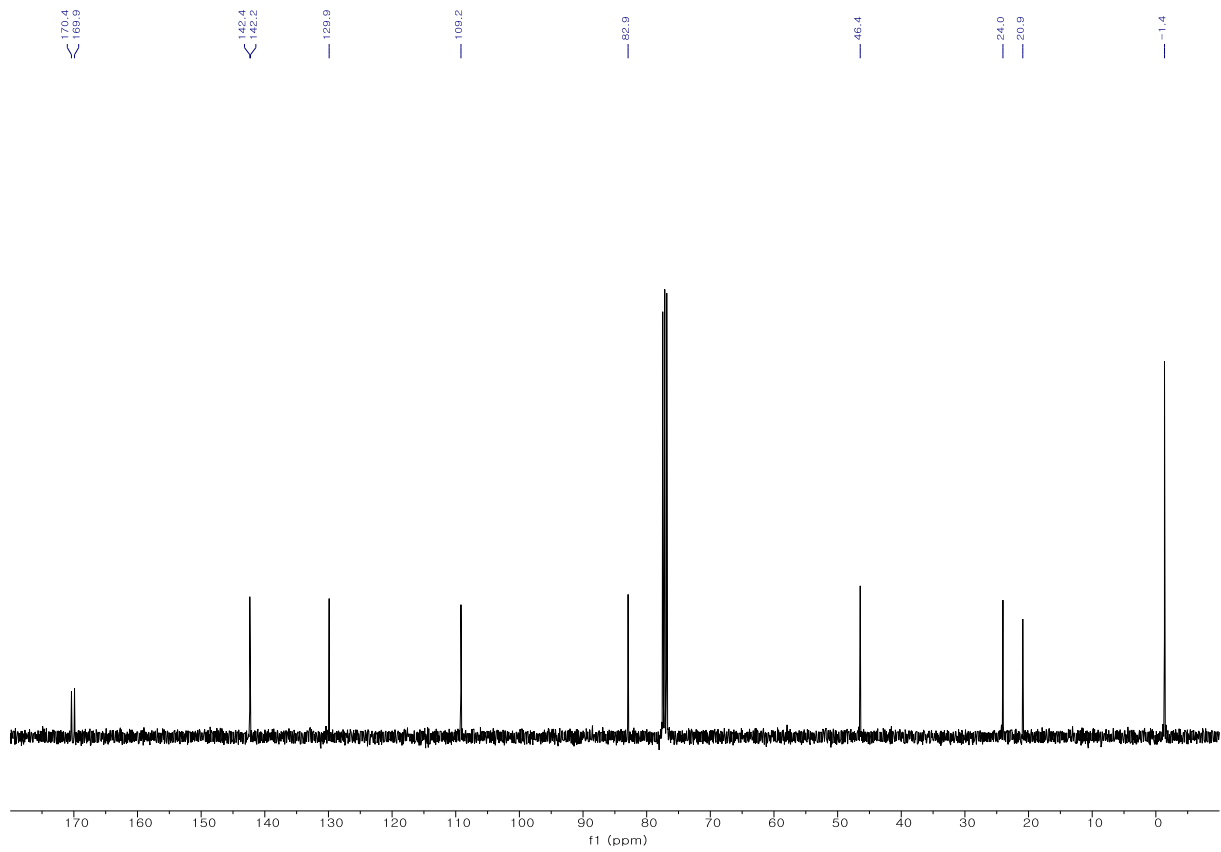

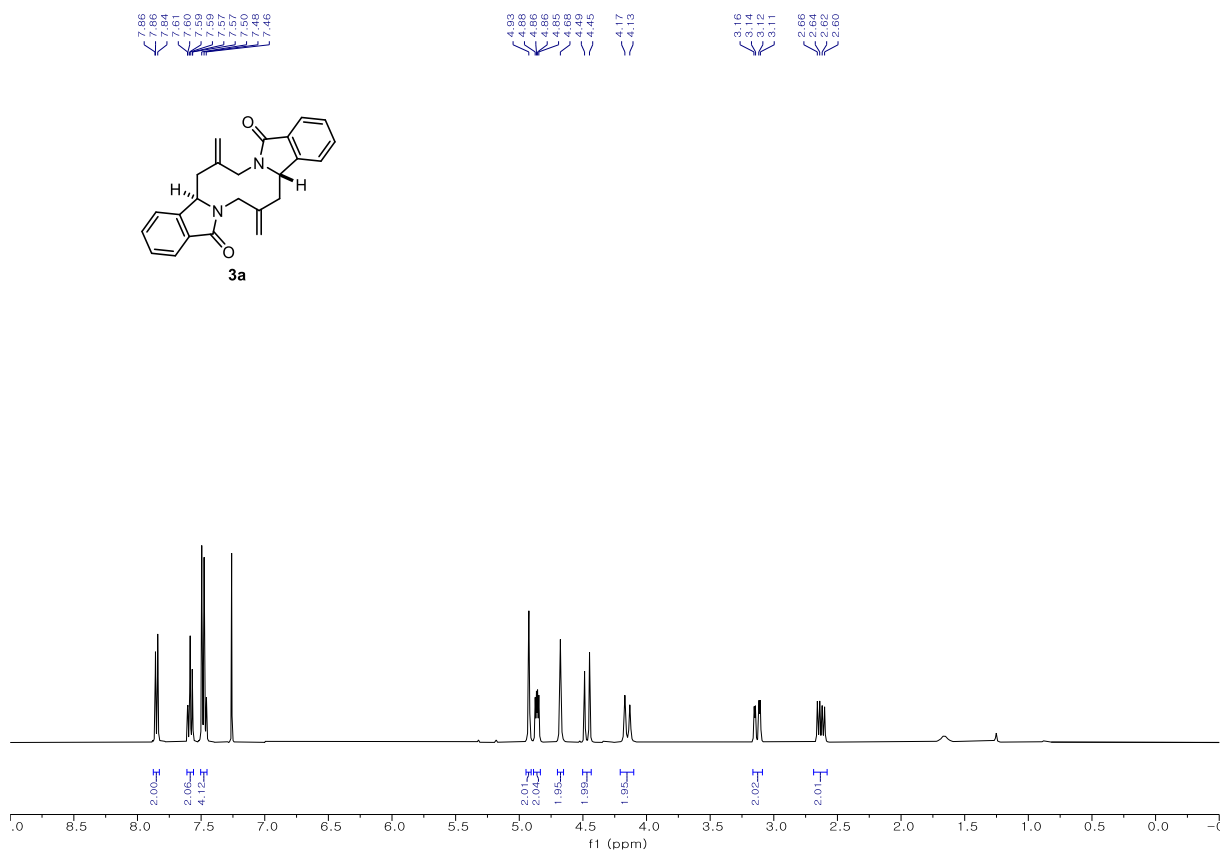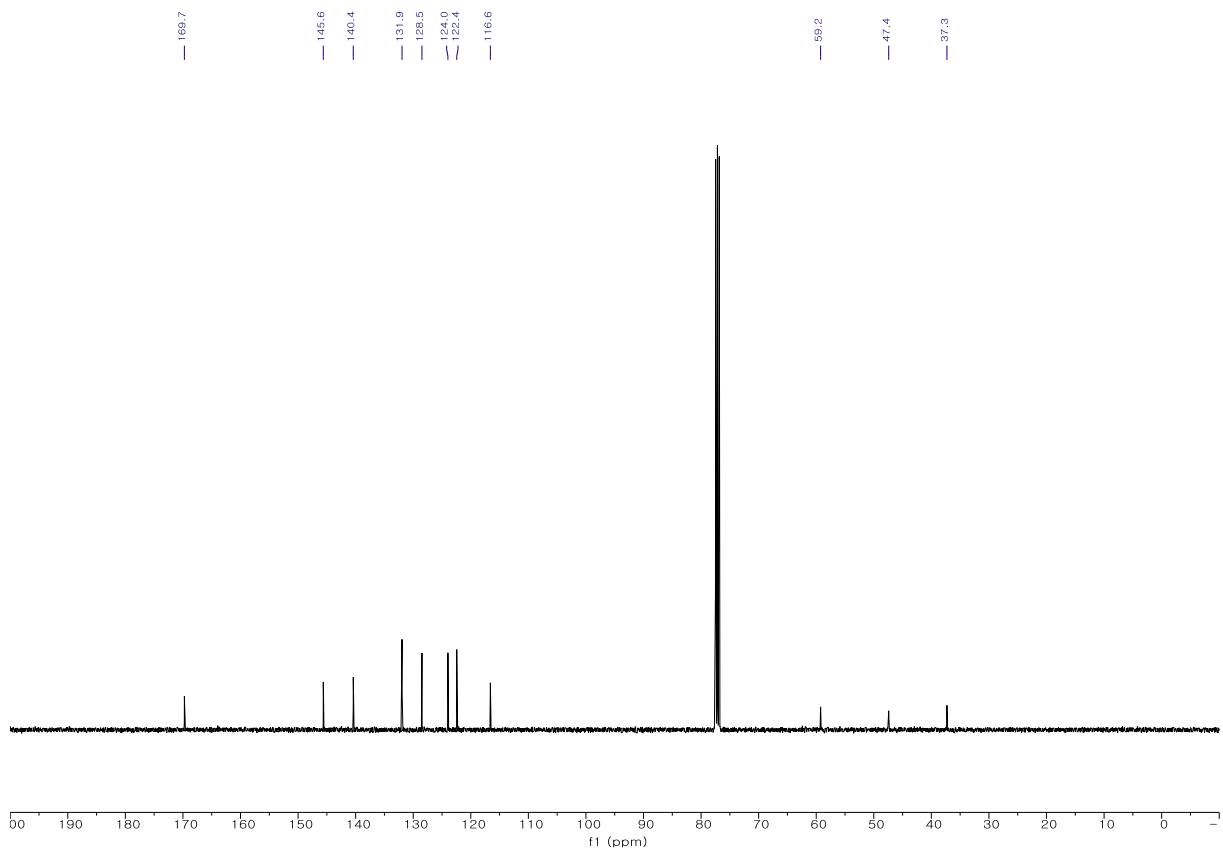

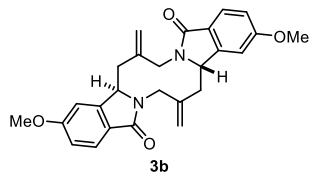

7.76  
7.75

7.00  
6.99  
6.98  
6.94  
6.94

4.92  
4.79  
4.78  
4.72  
4.67  
4.45  
4.42

4.11  
4.09  
3.88

3.11  
3.08  
3.07  
2.63  
2.60  
2.59

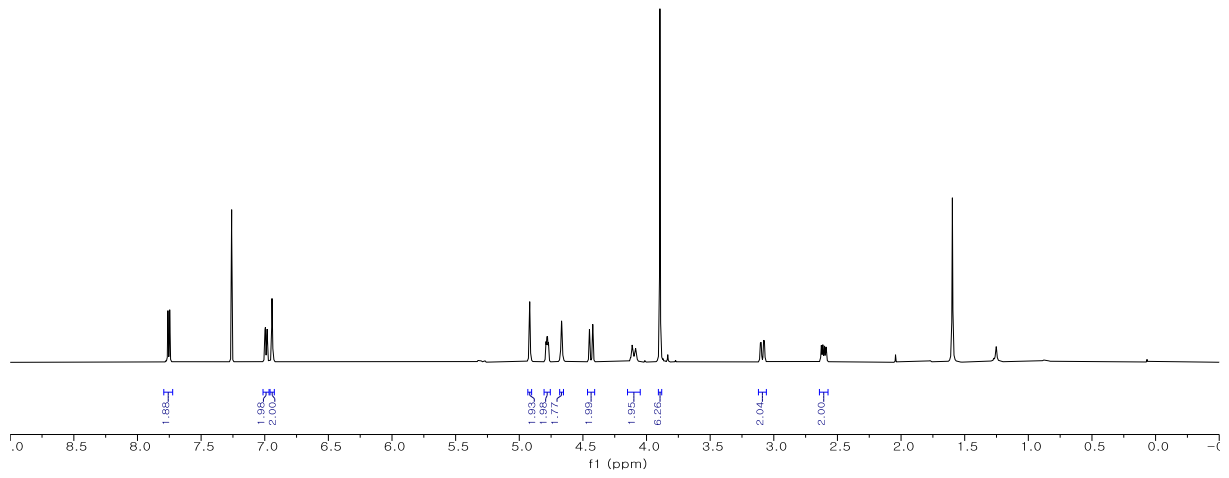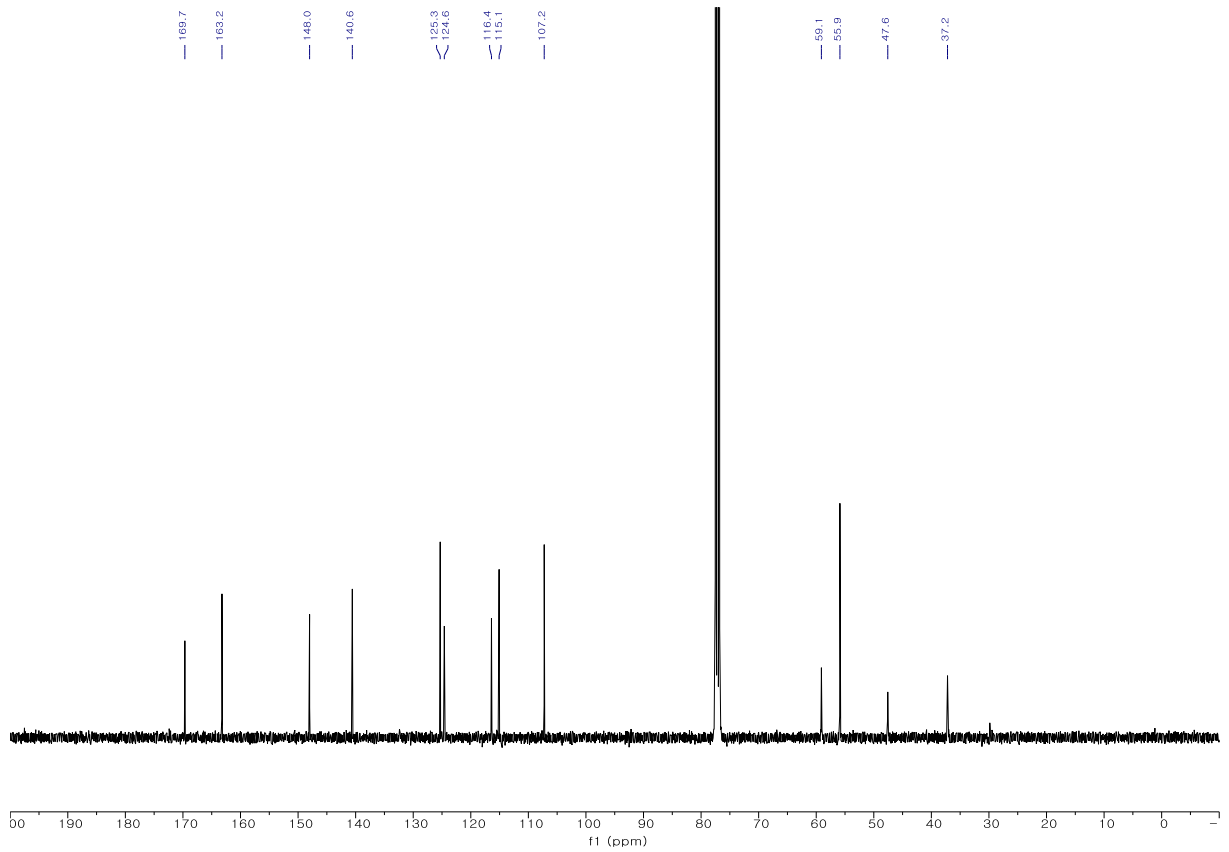

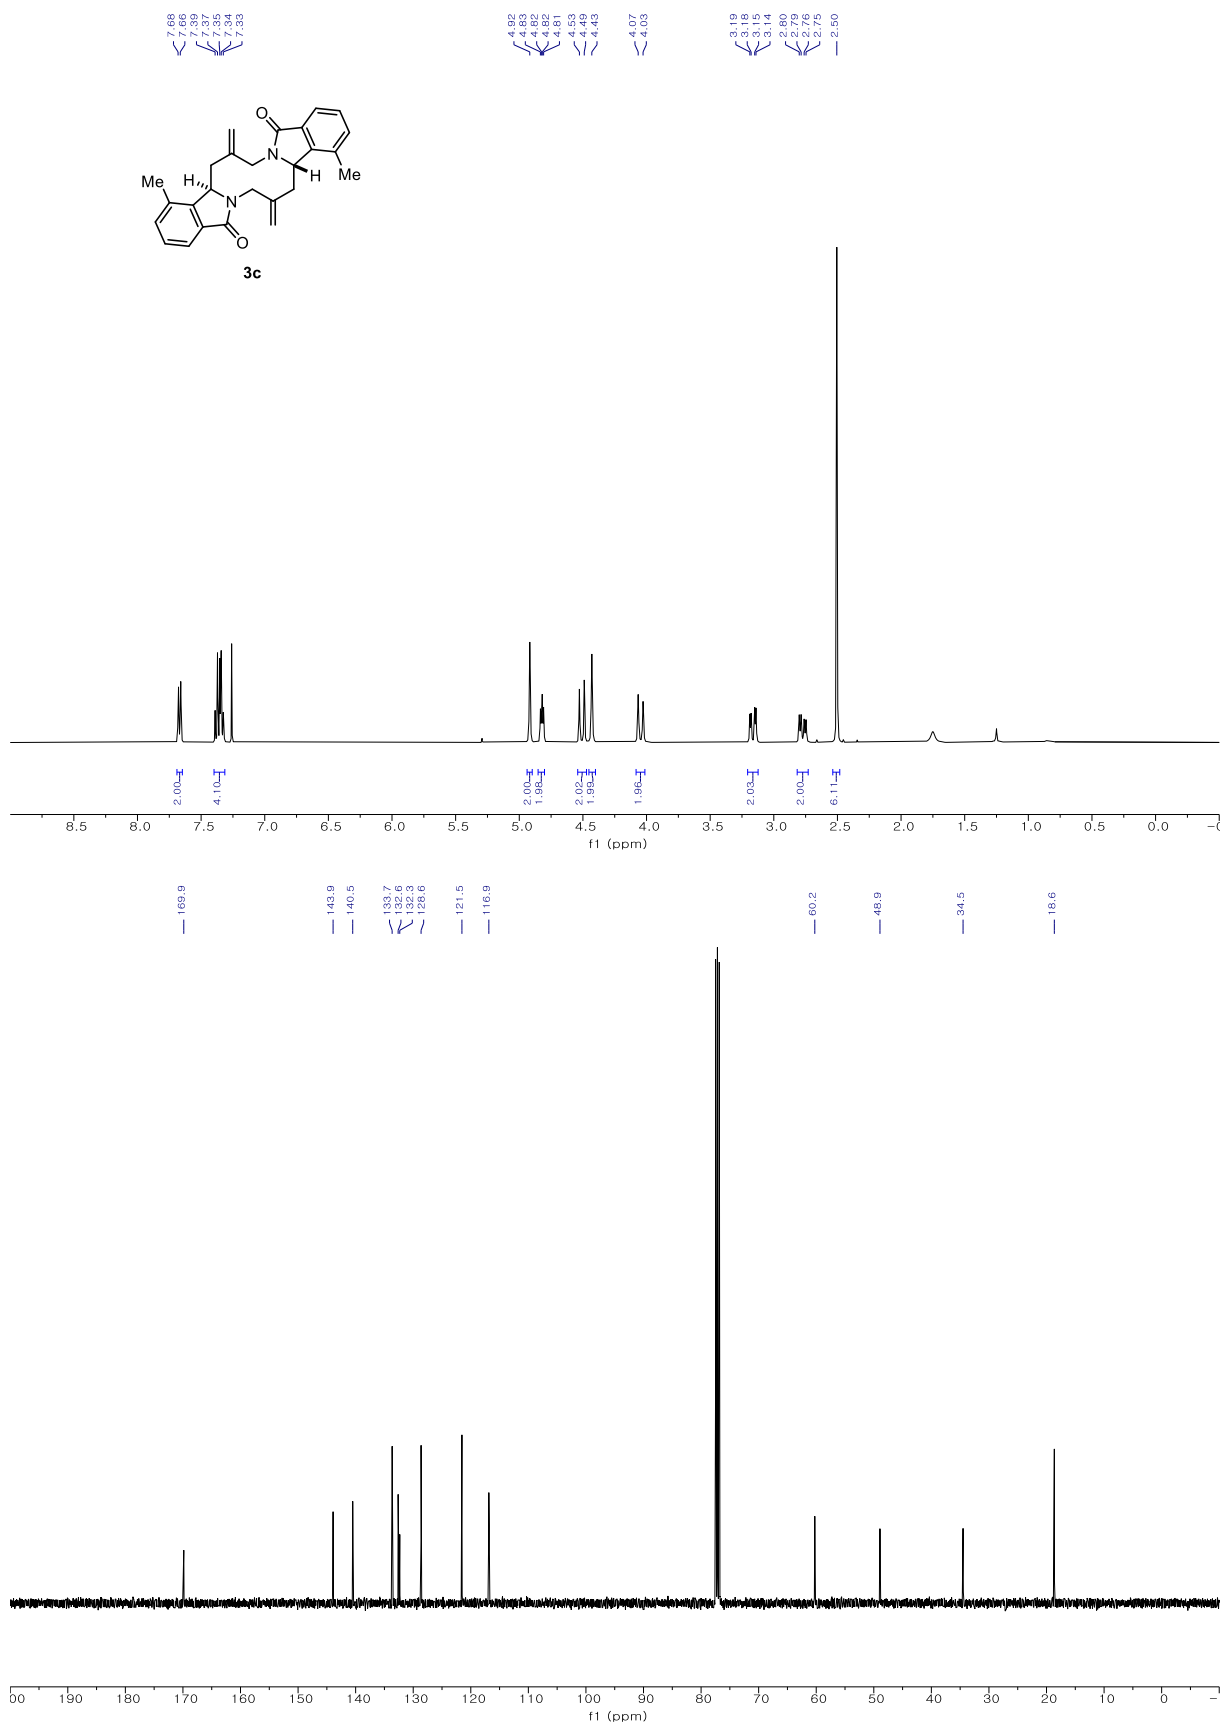



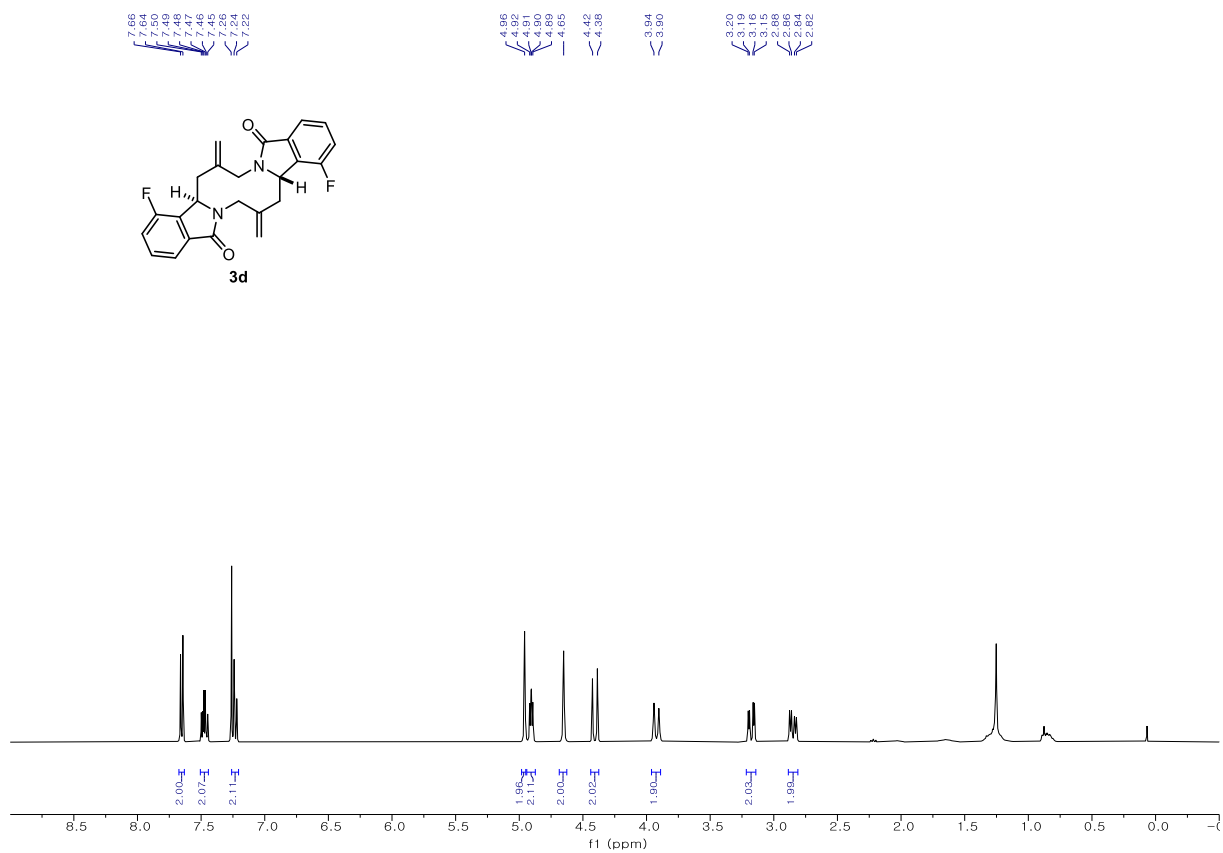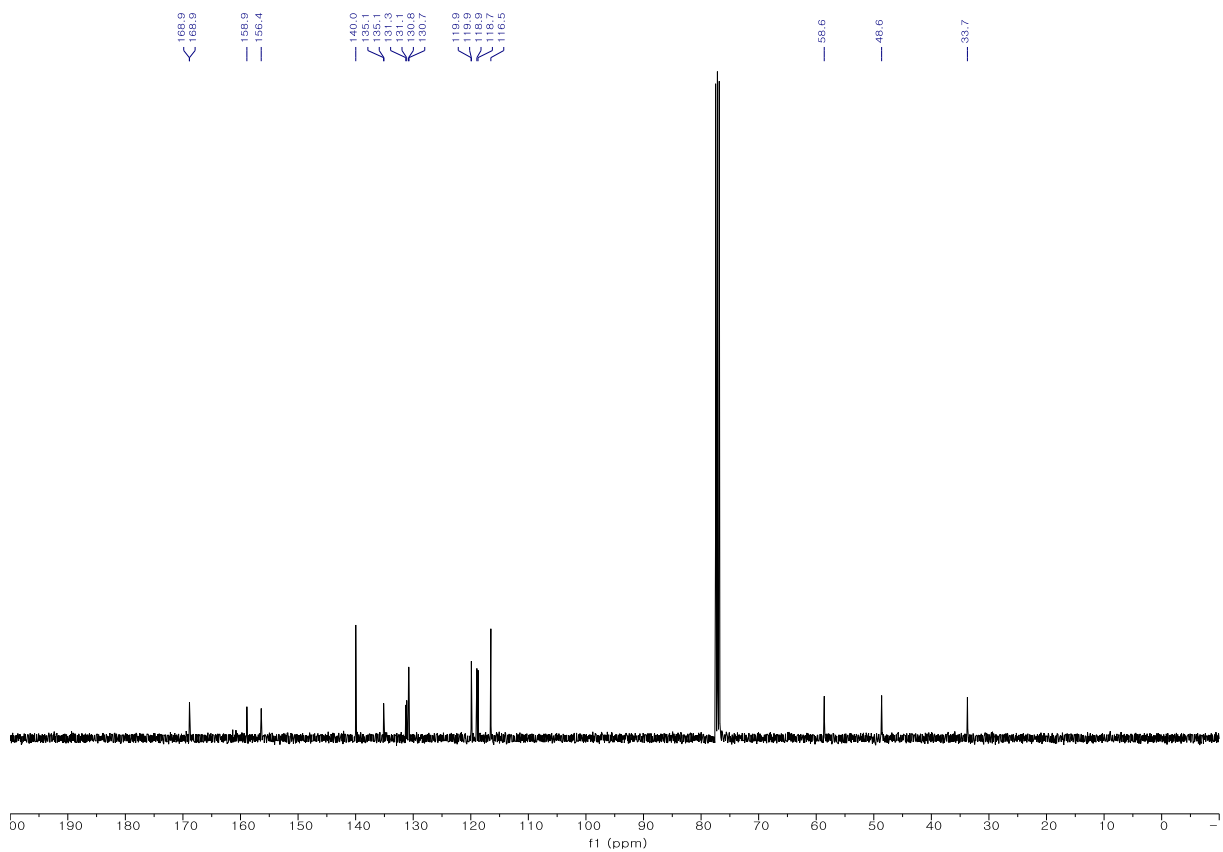

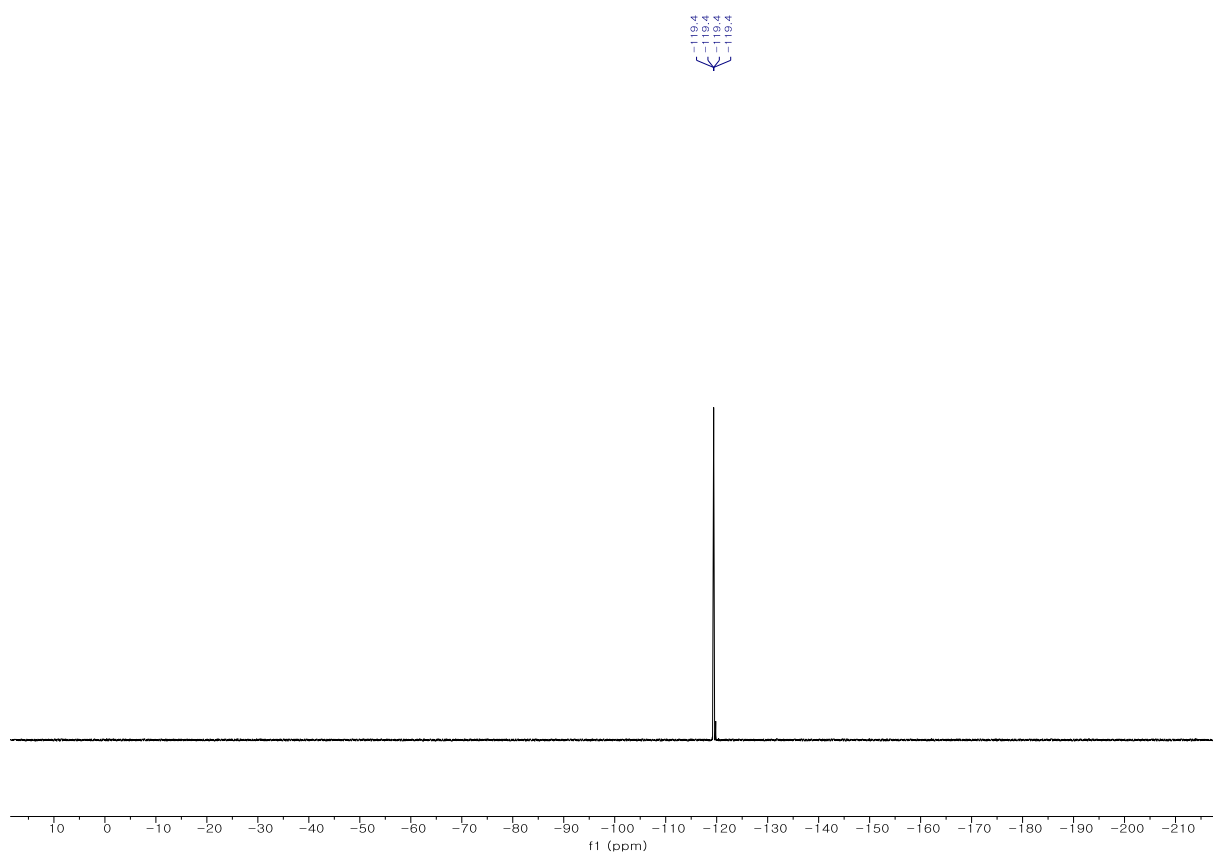

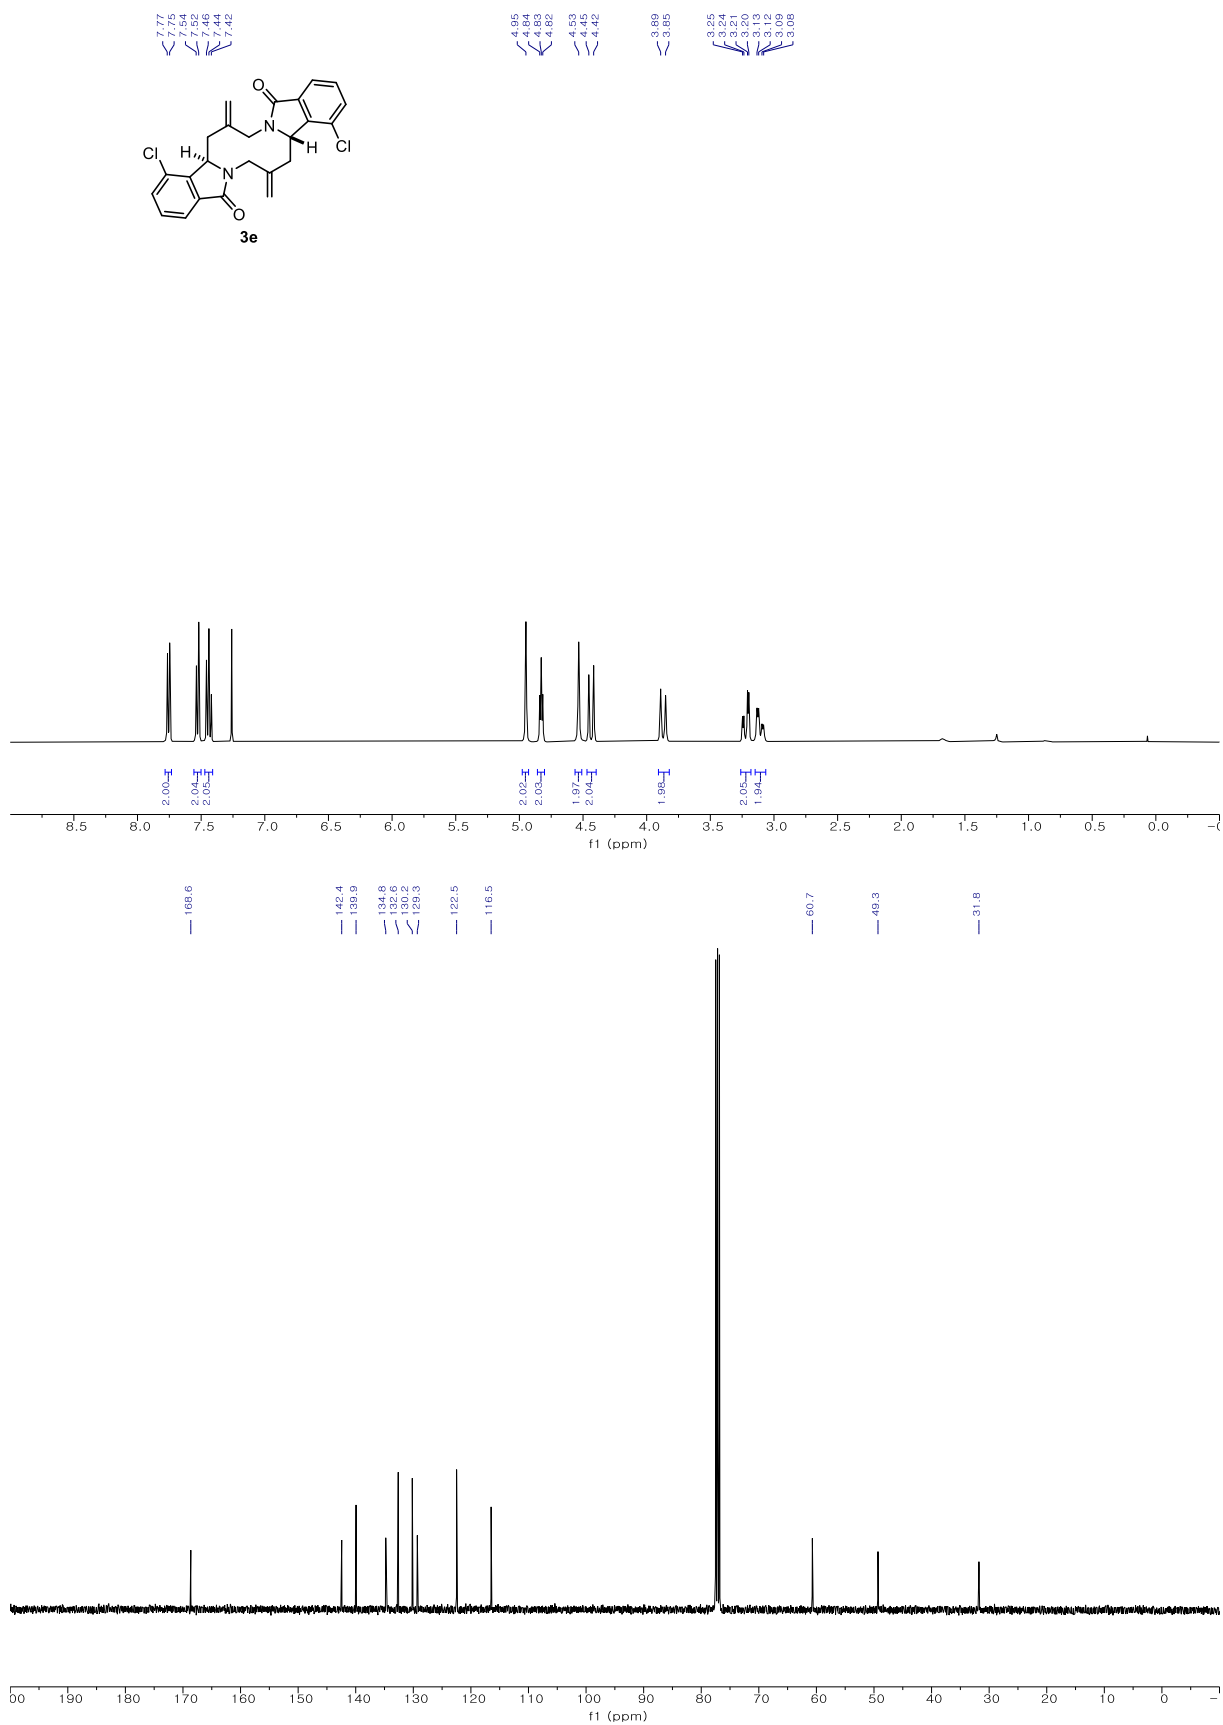

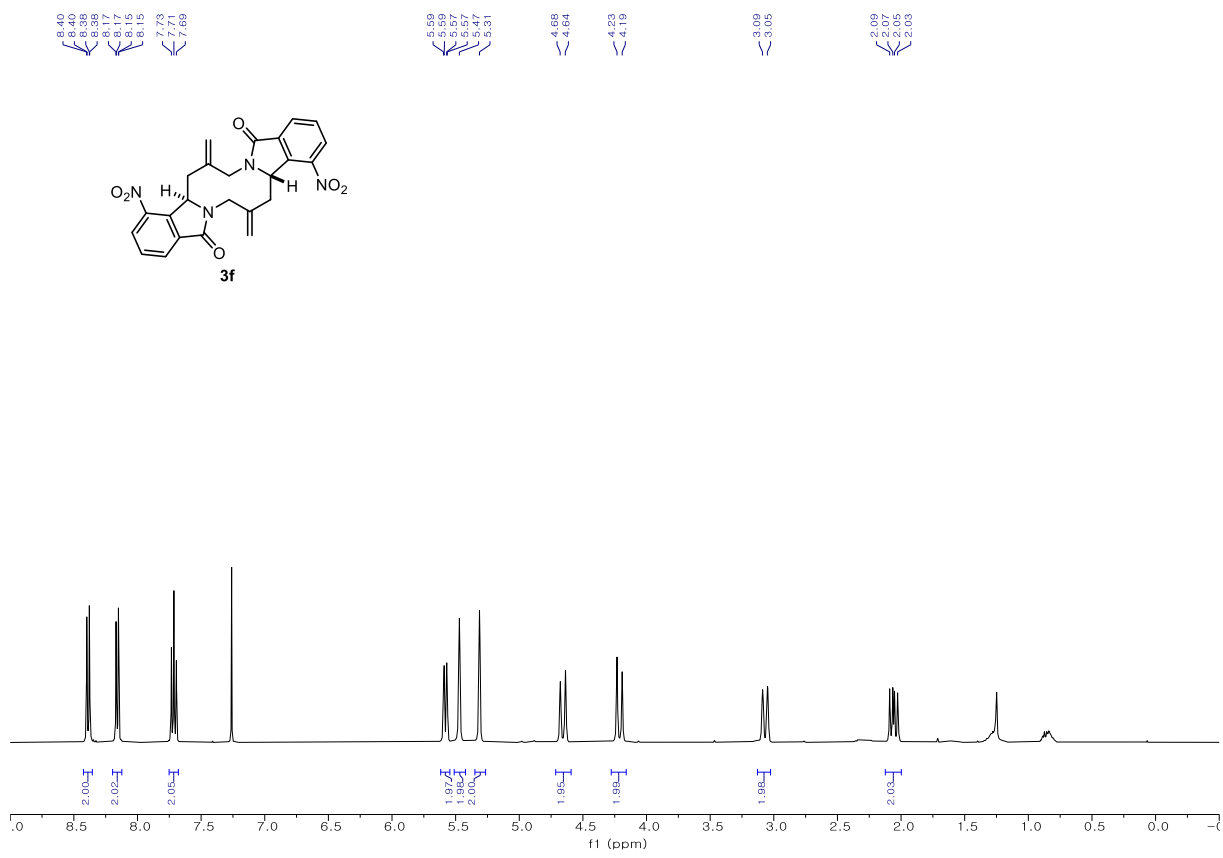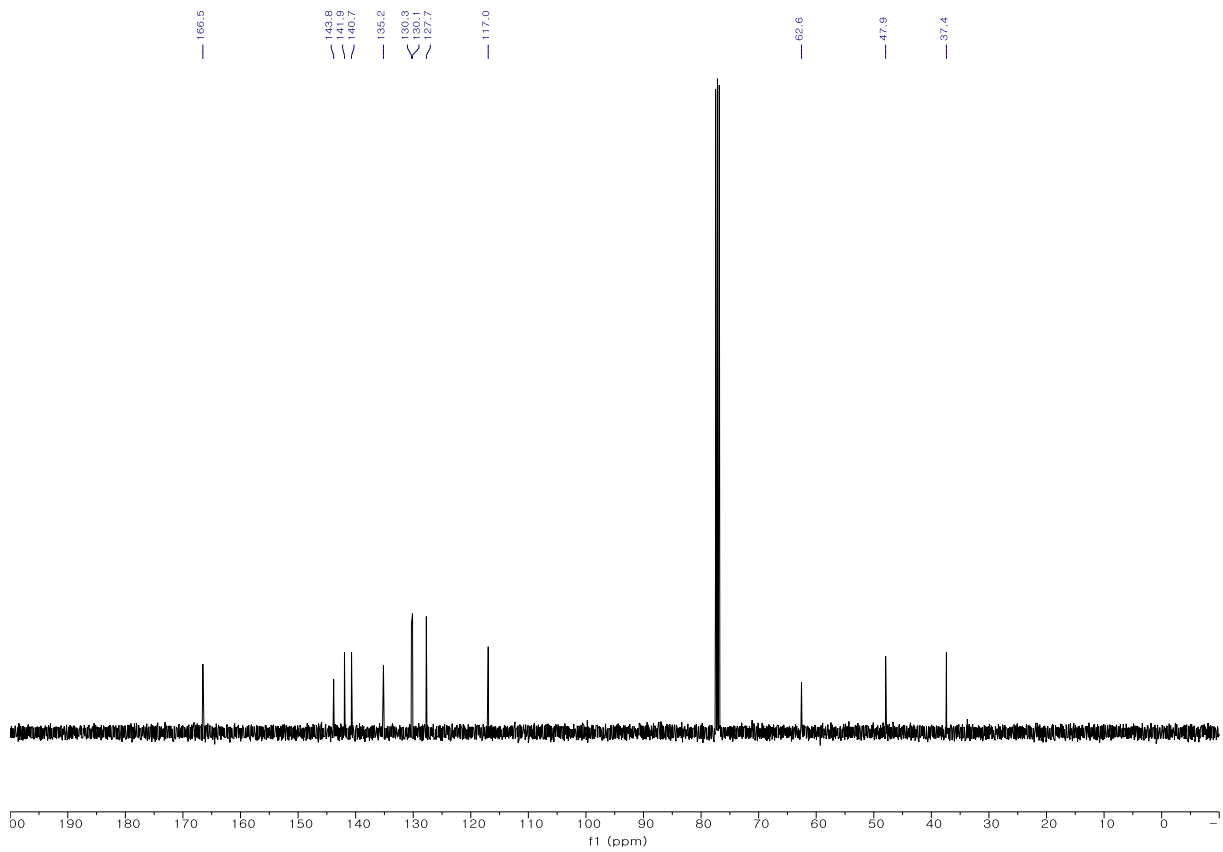

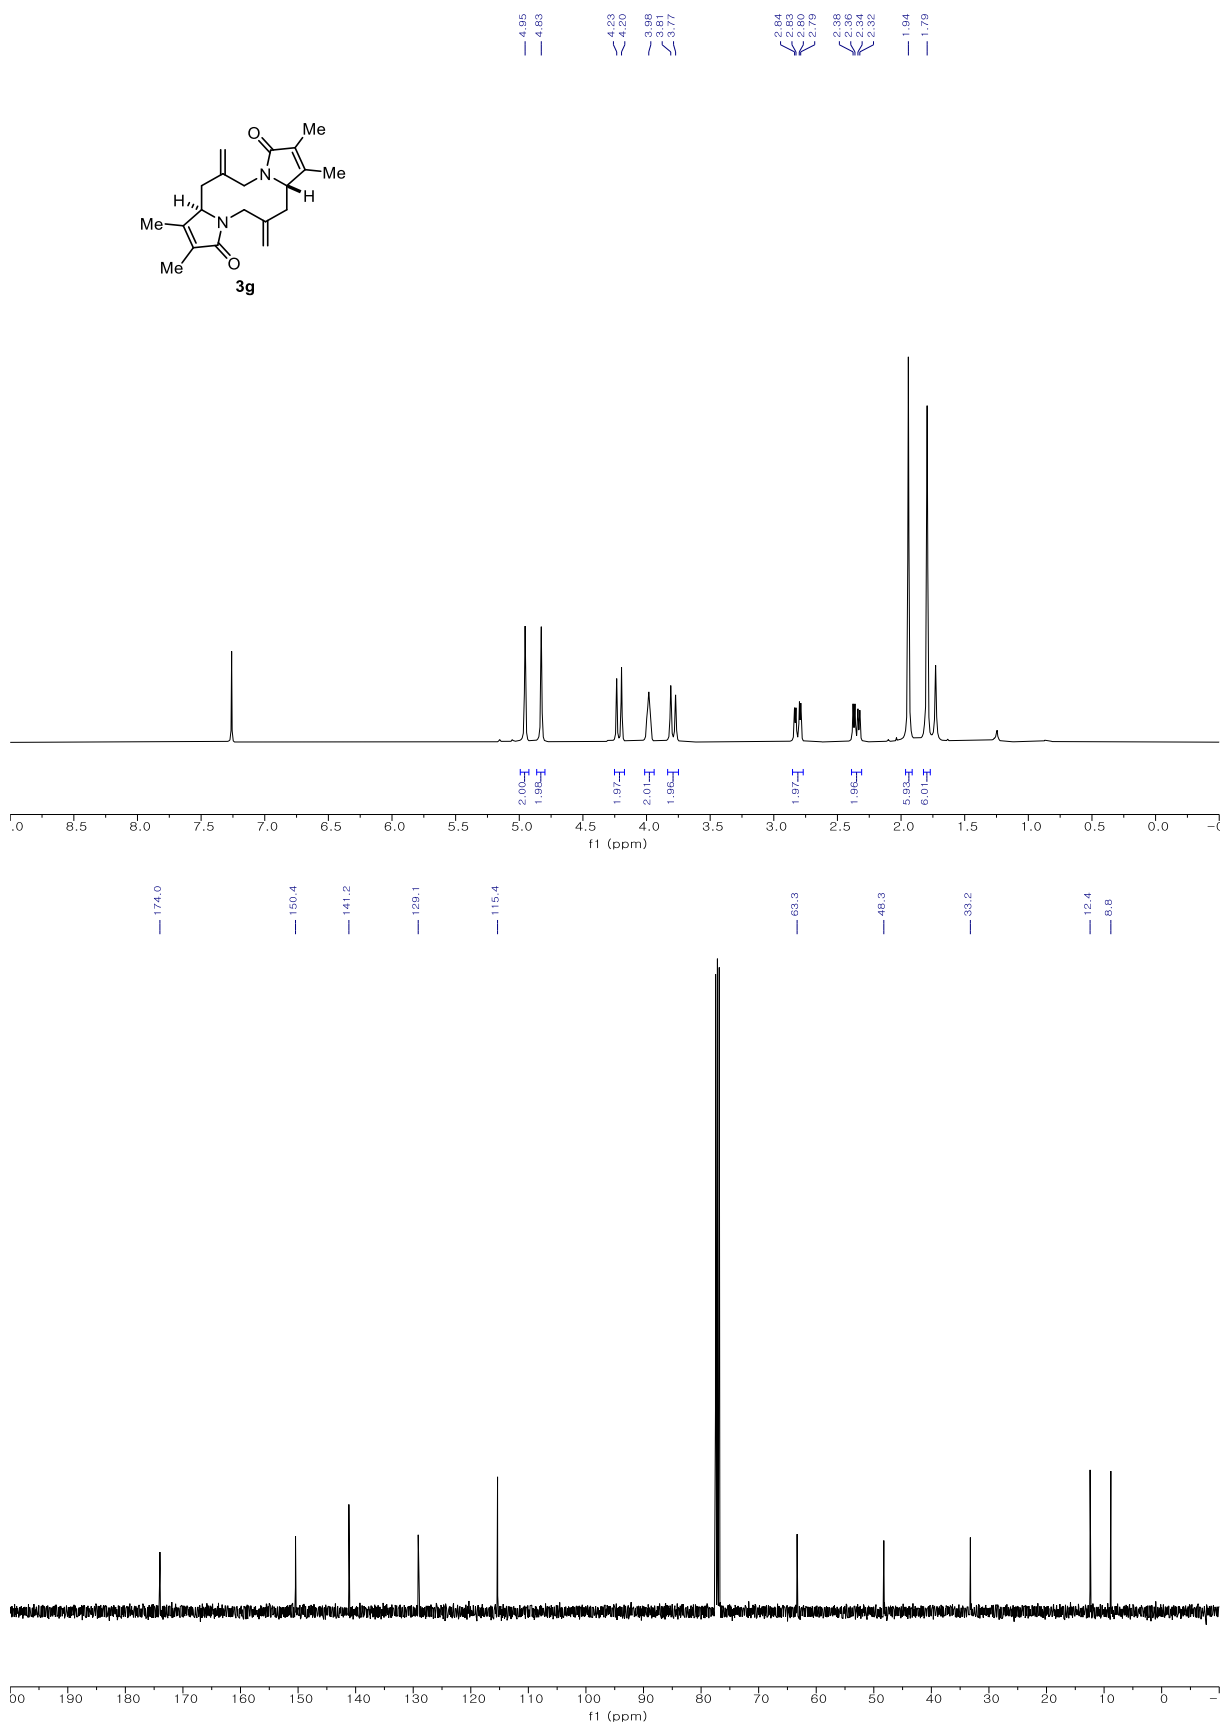

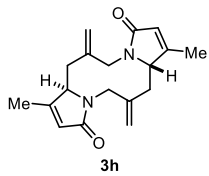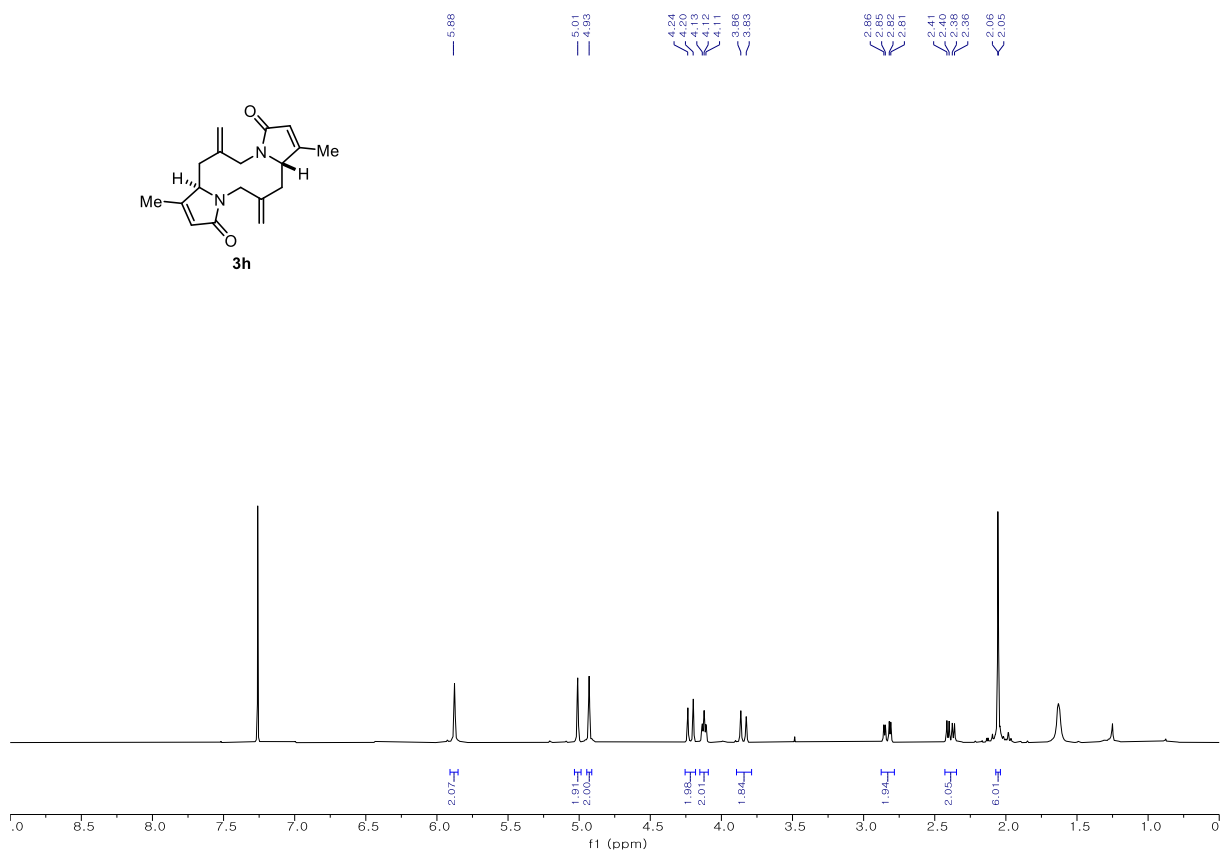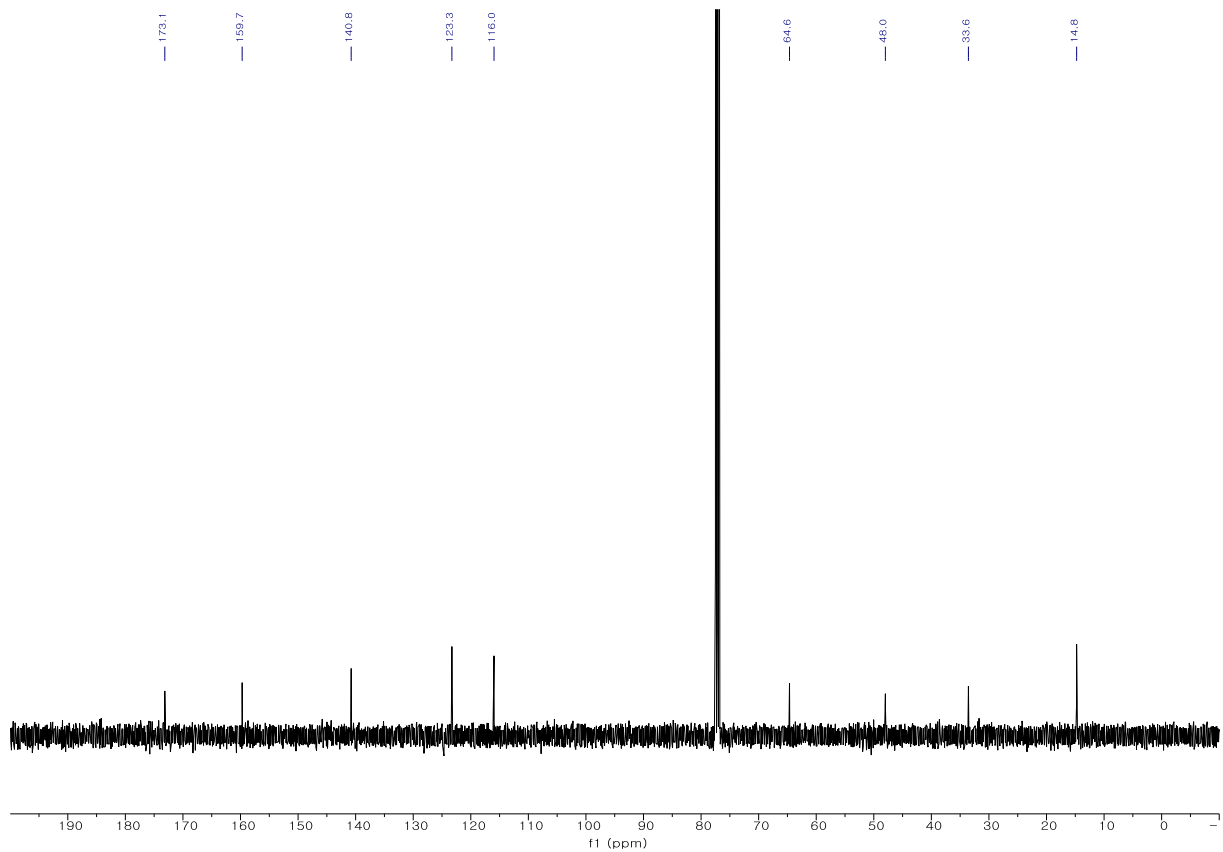

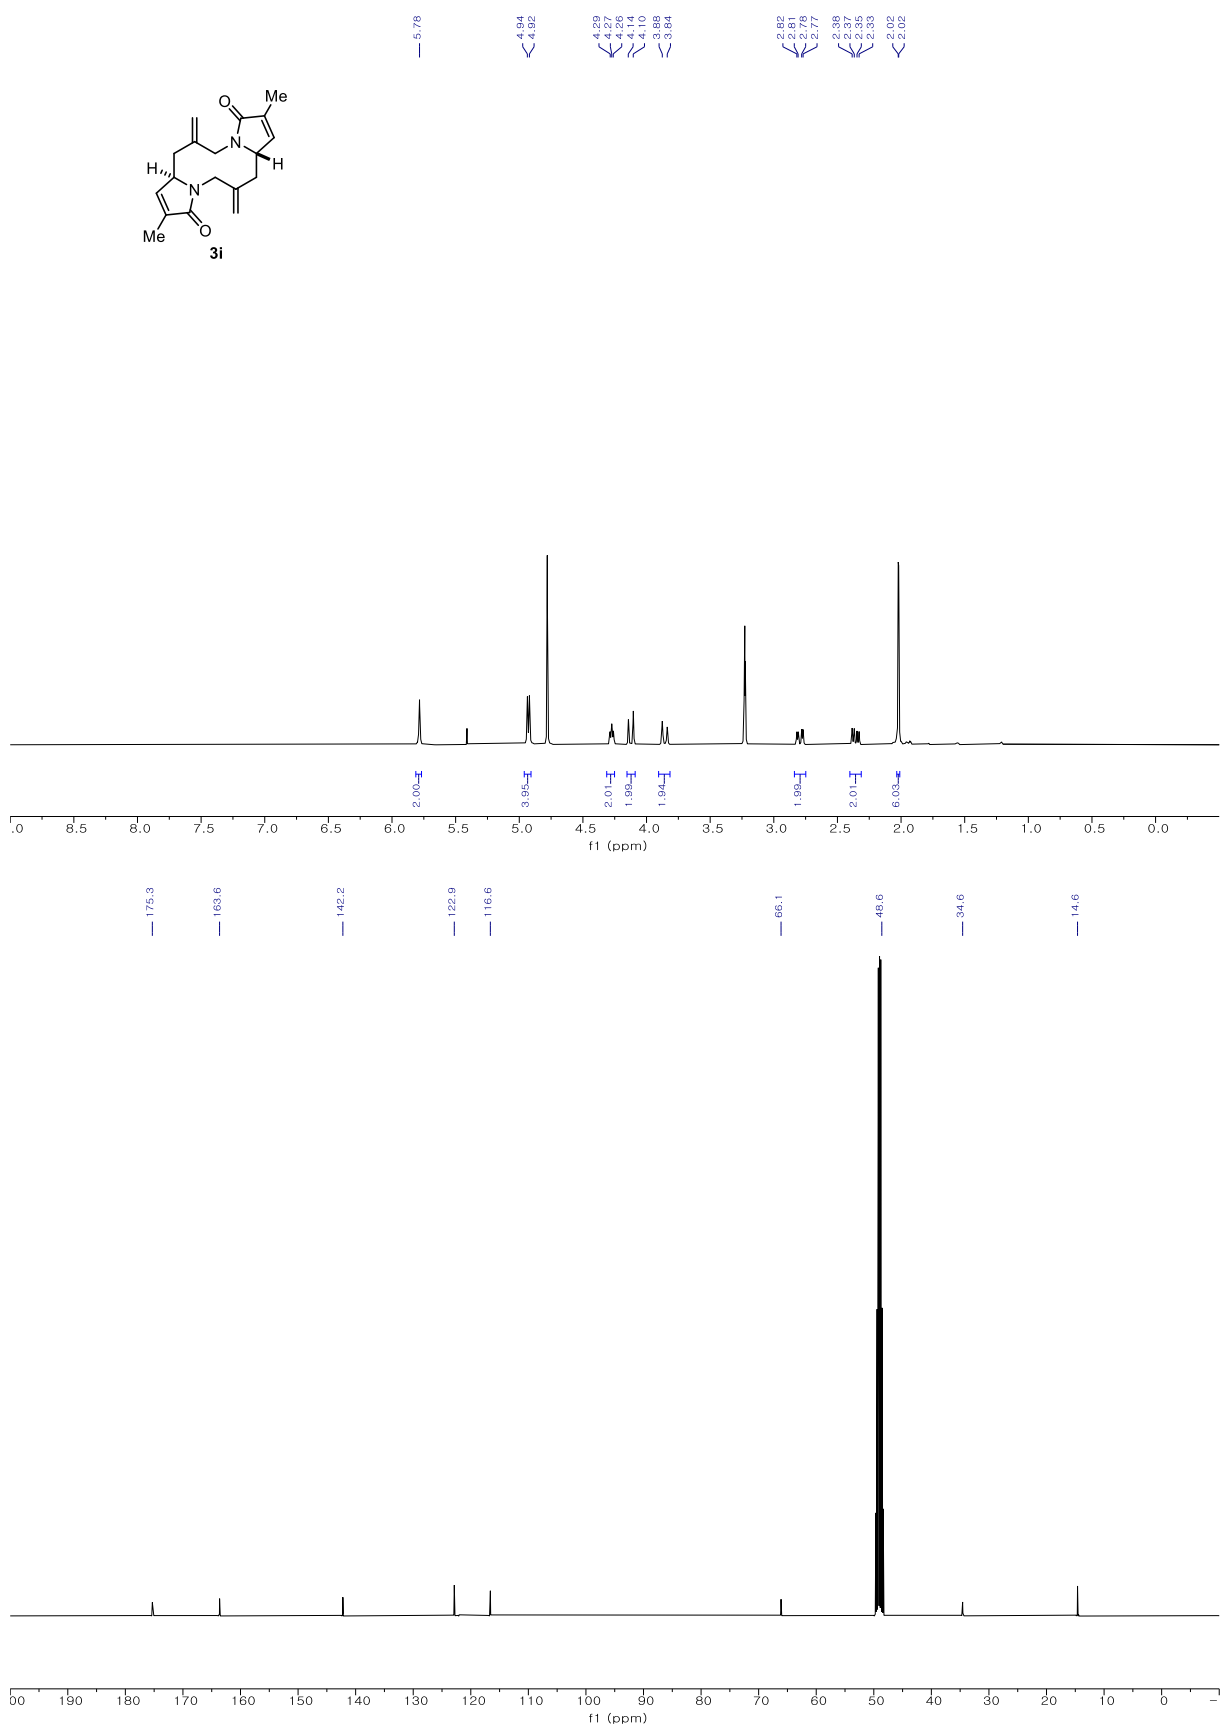

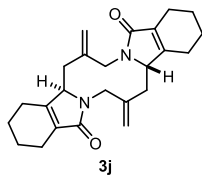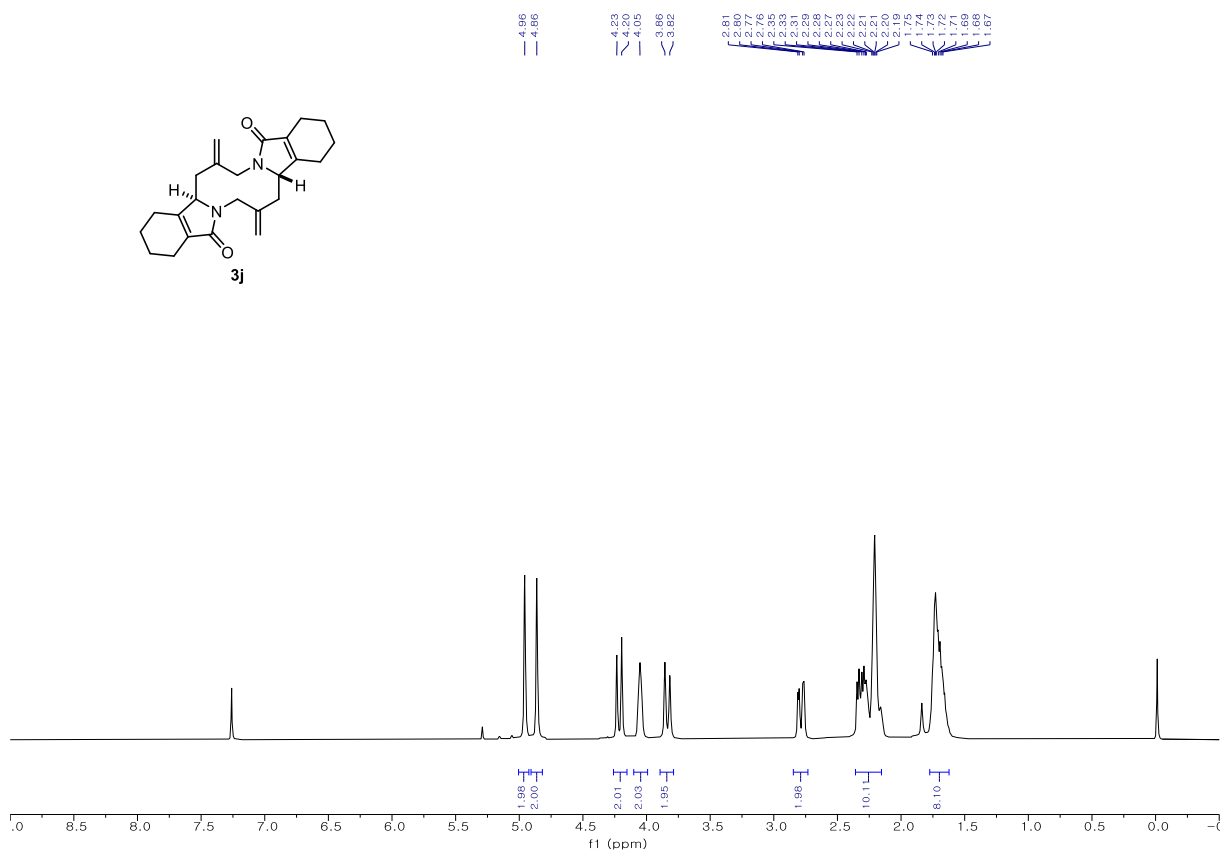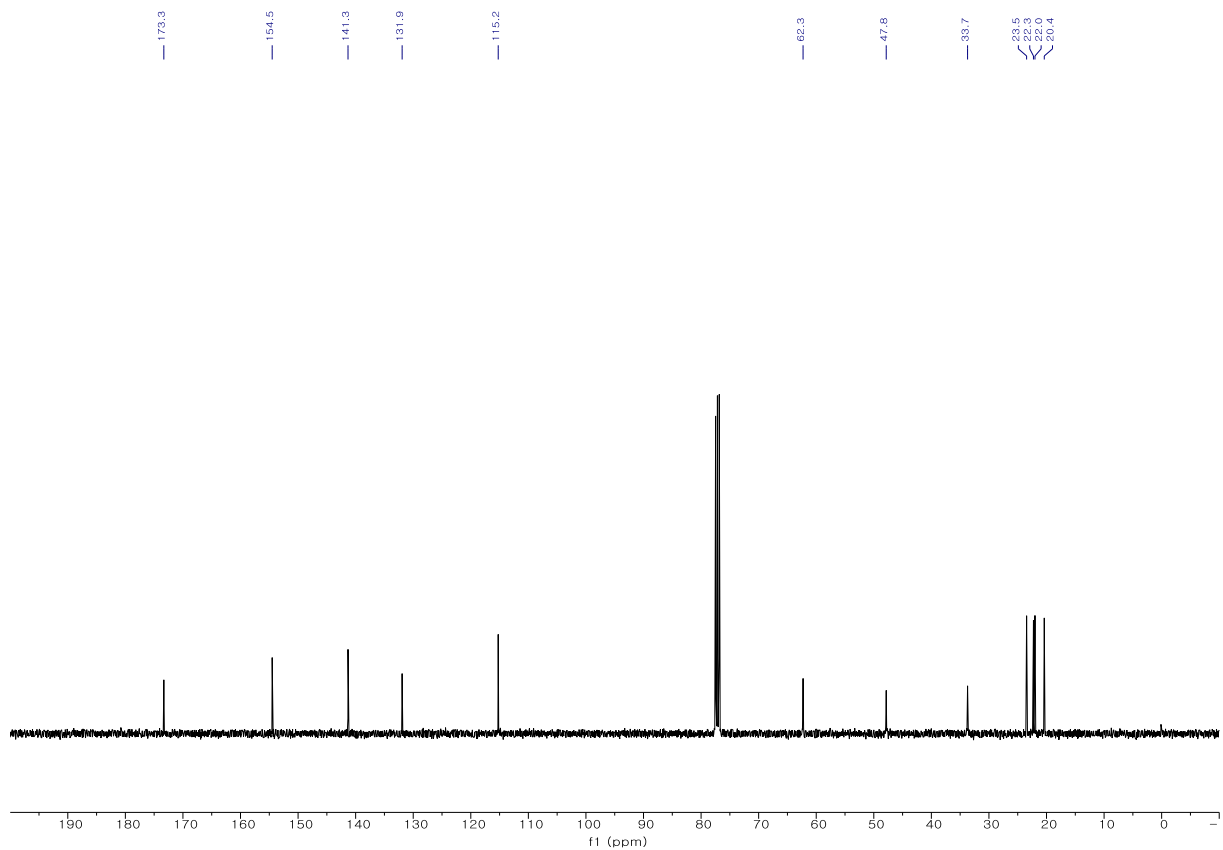



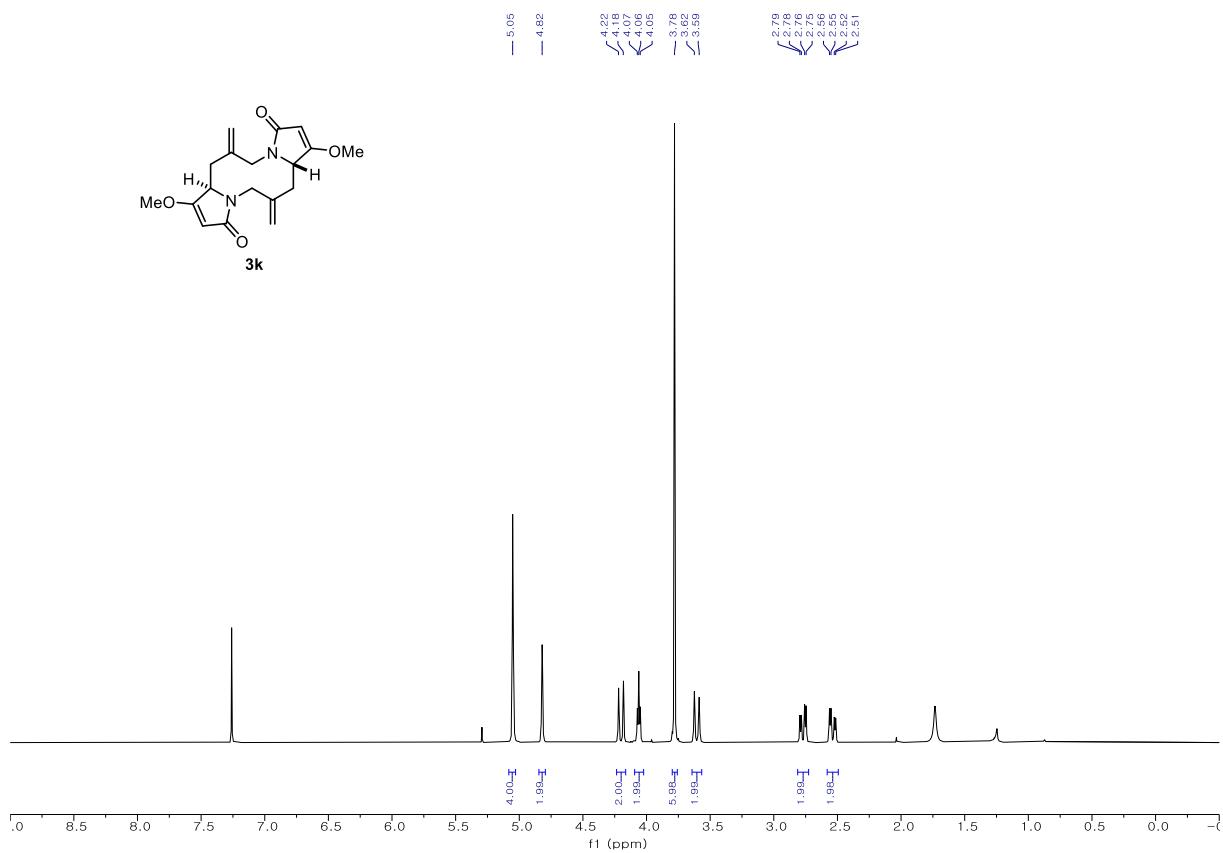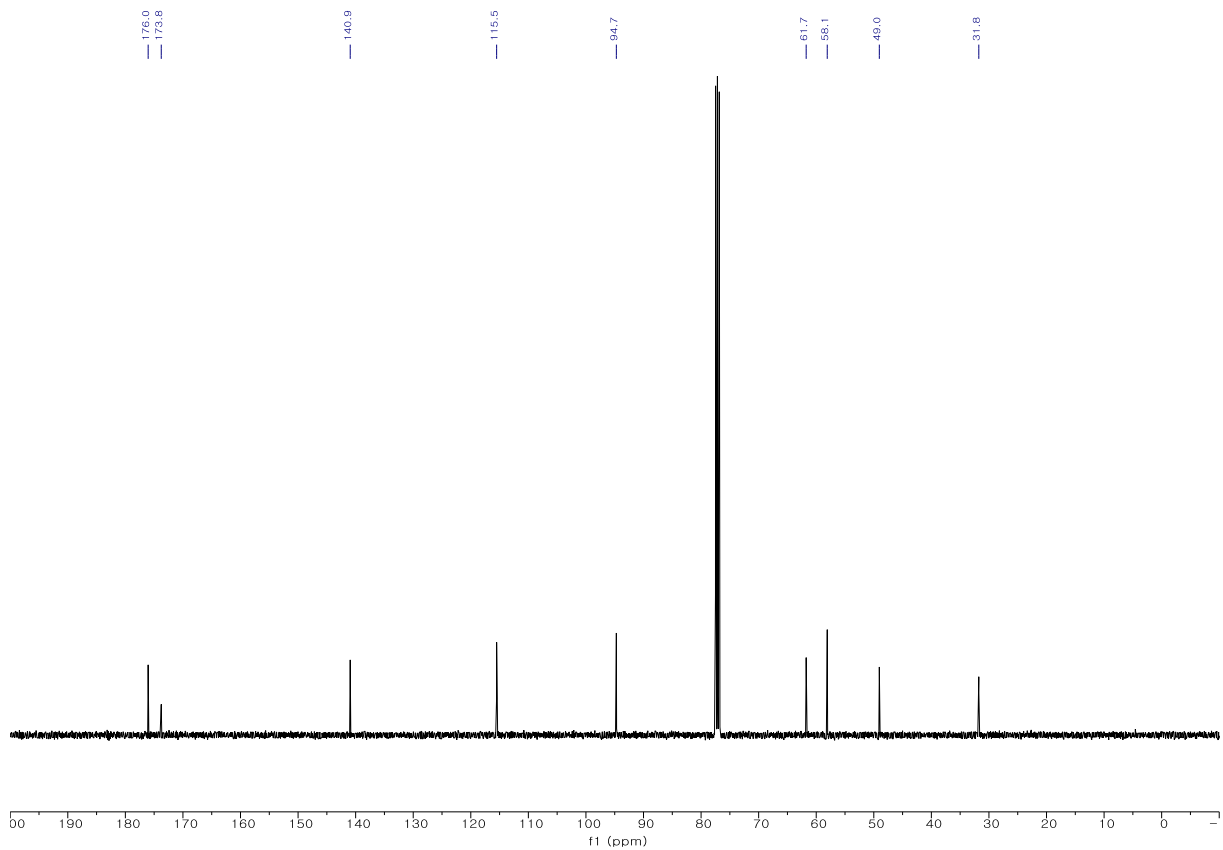

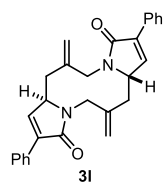

7.90  
7.88  
7.41  
7.39  
7.36  
7.35  
7.19

5.10  
5.04  
4.40  
4.39  
4.38  
4.37  
4.36  
3.91  
3.87

2.97  
2.96  
2.92  
2.58  
2.56  
2.53

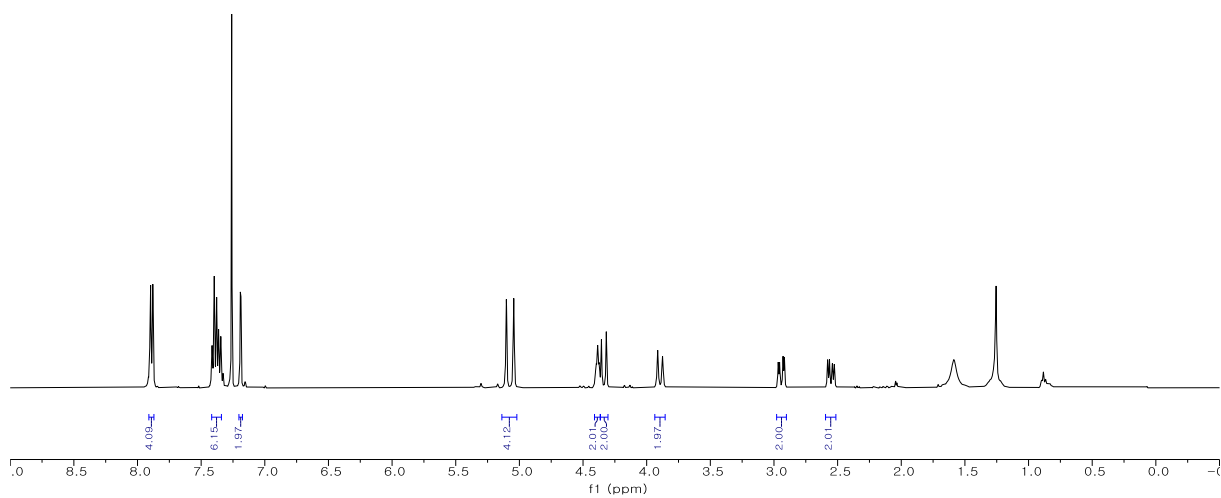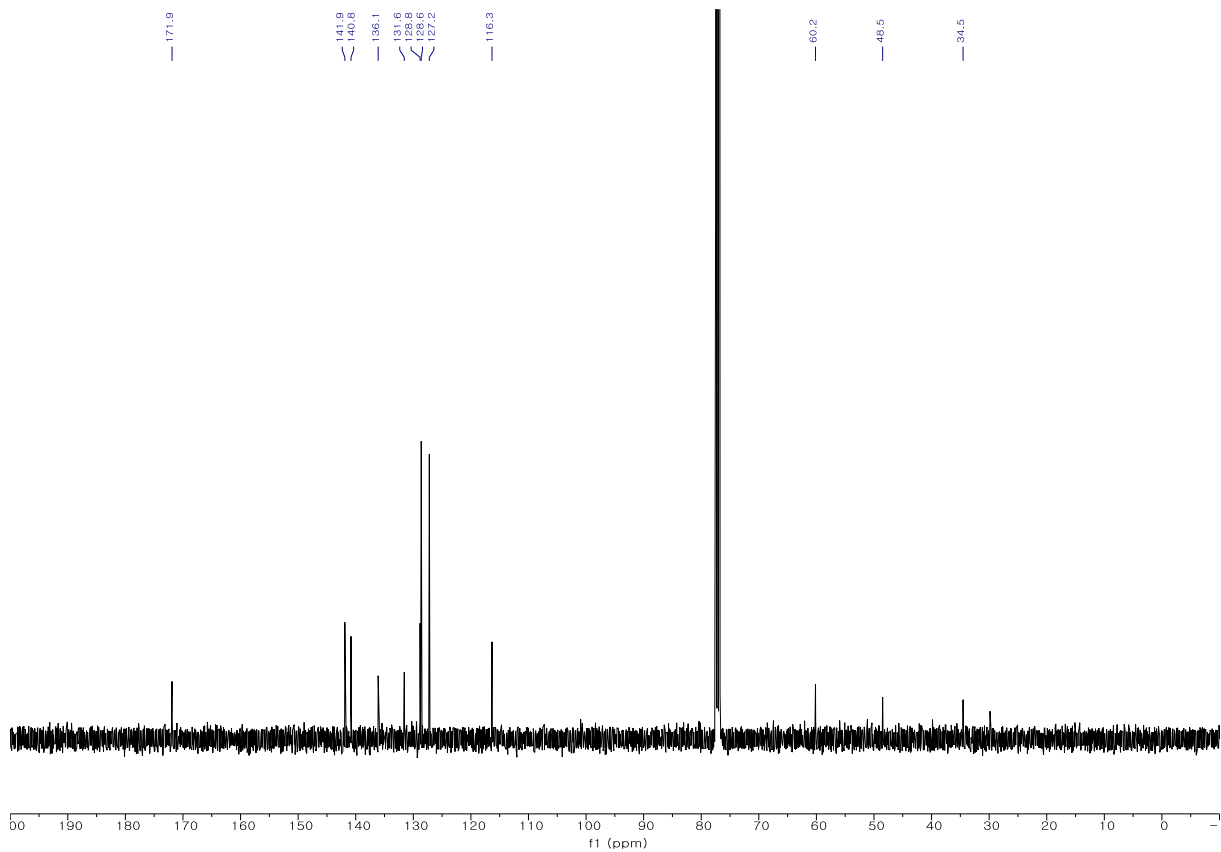

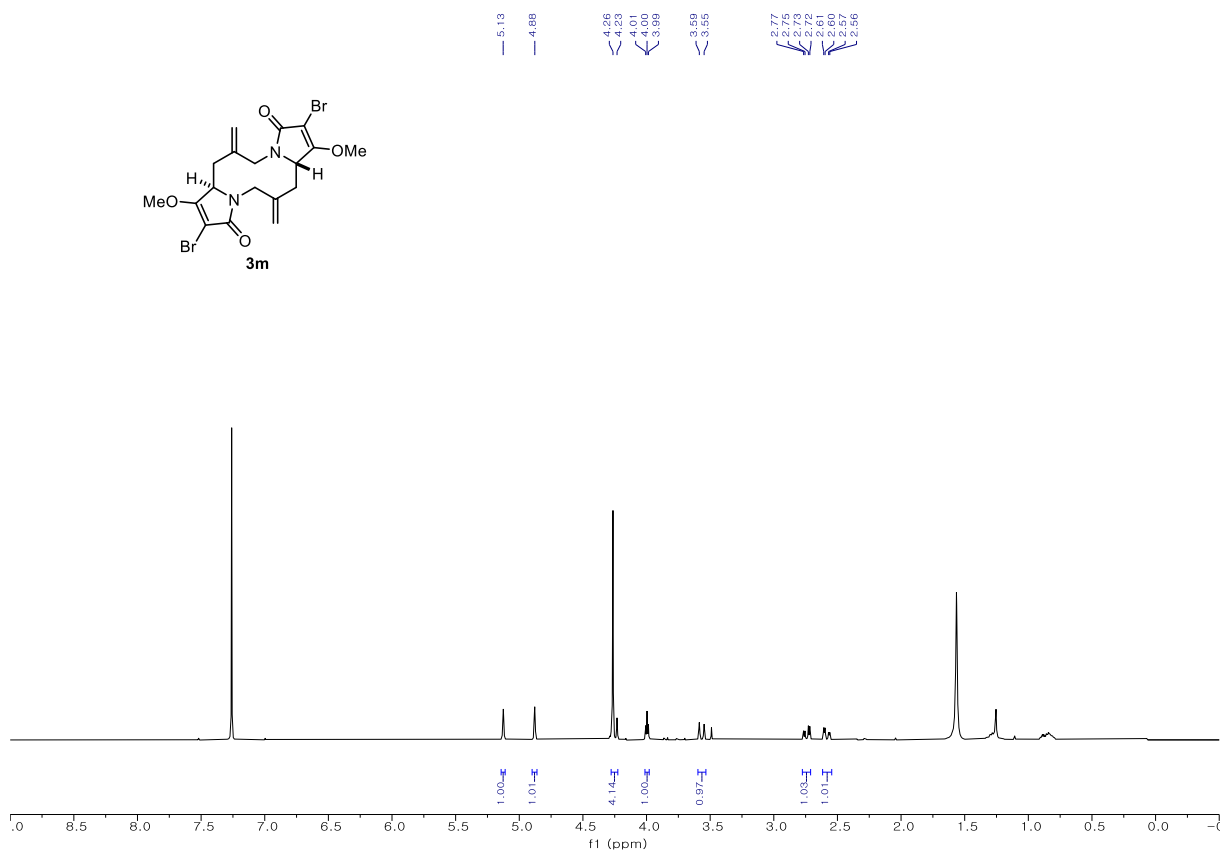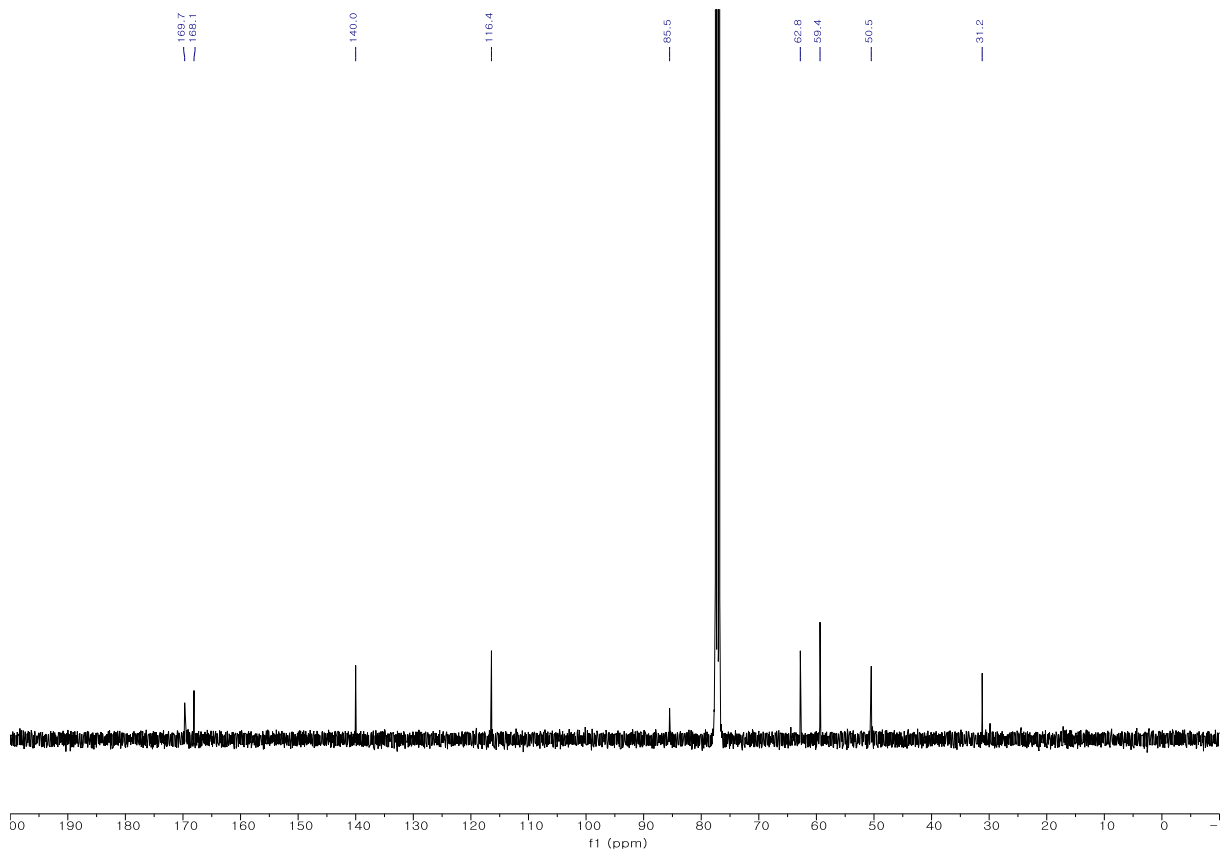

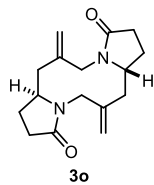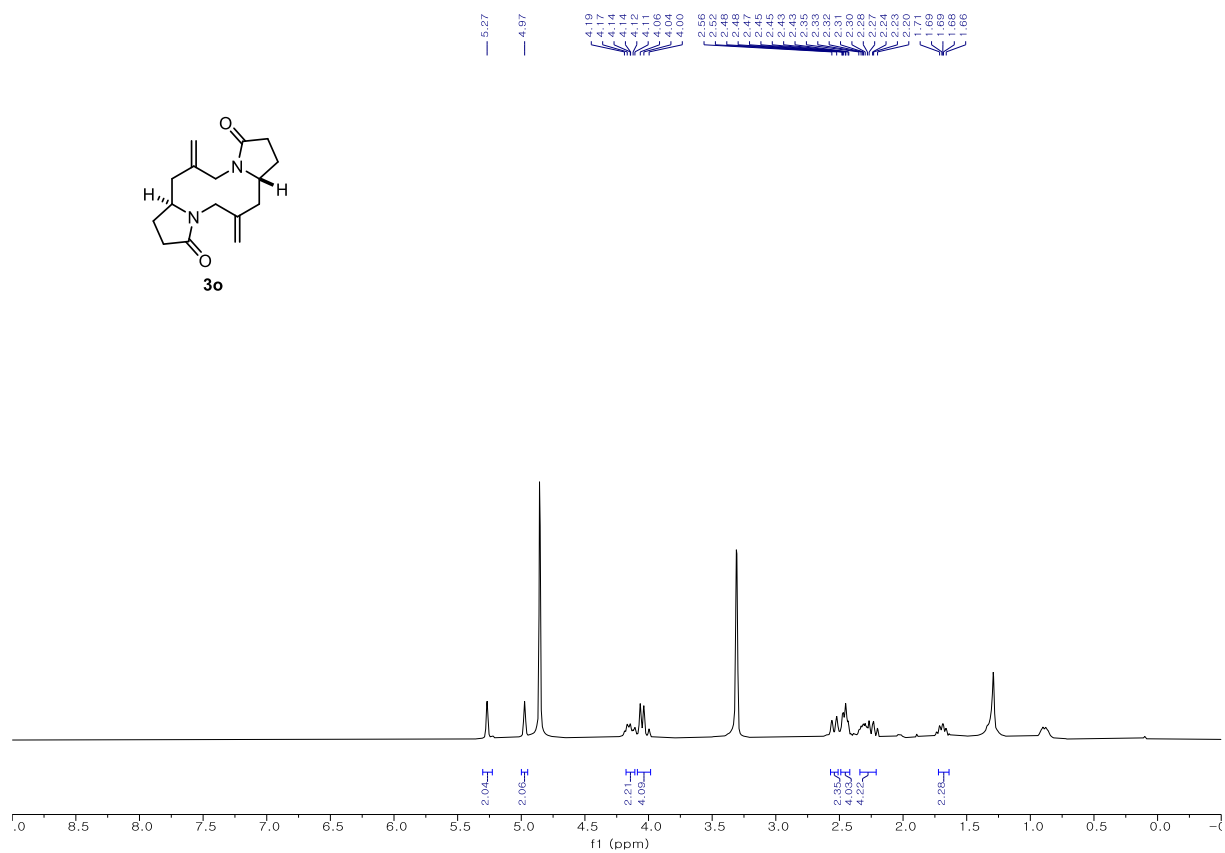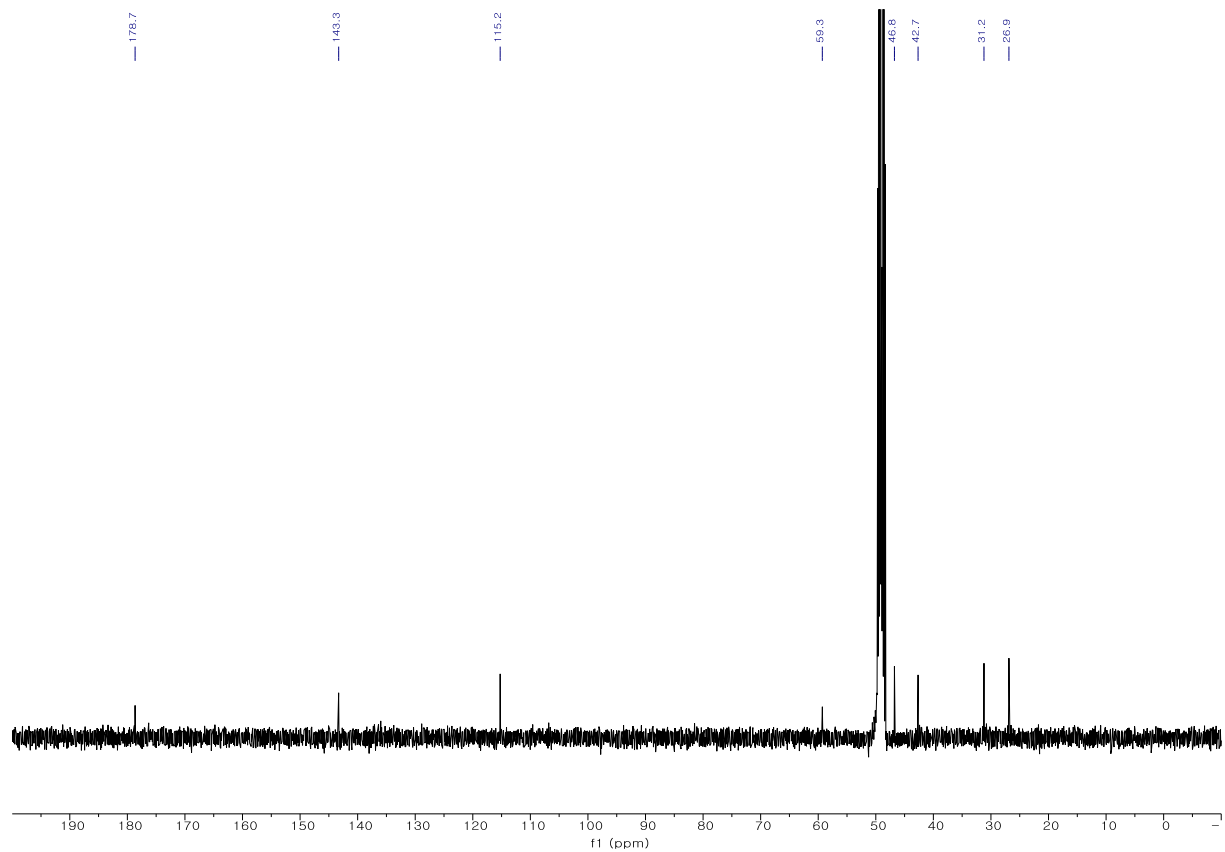

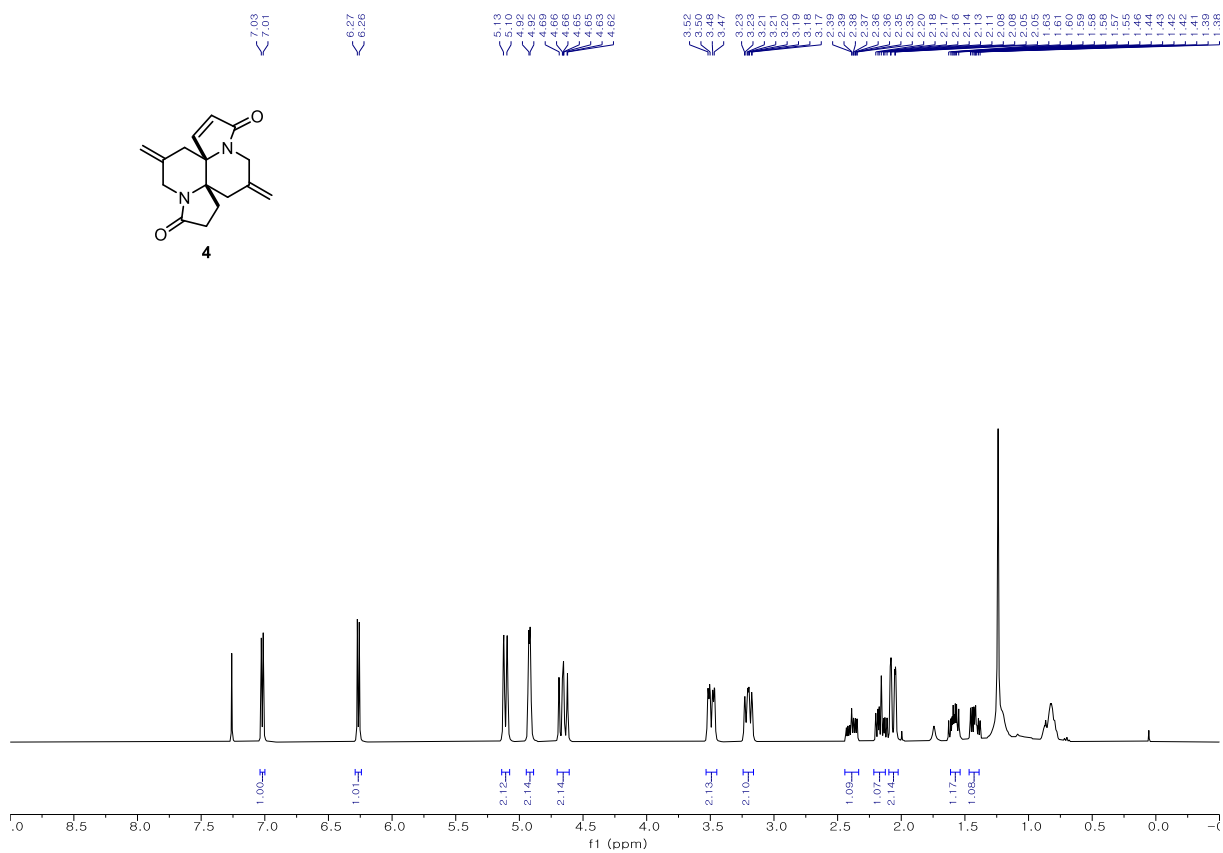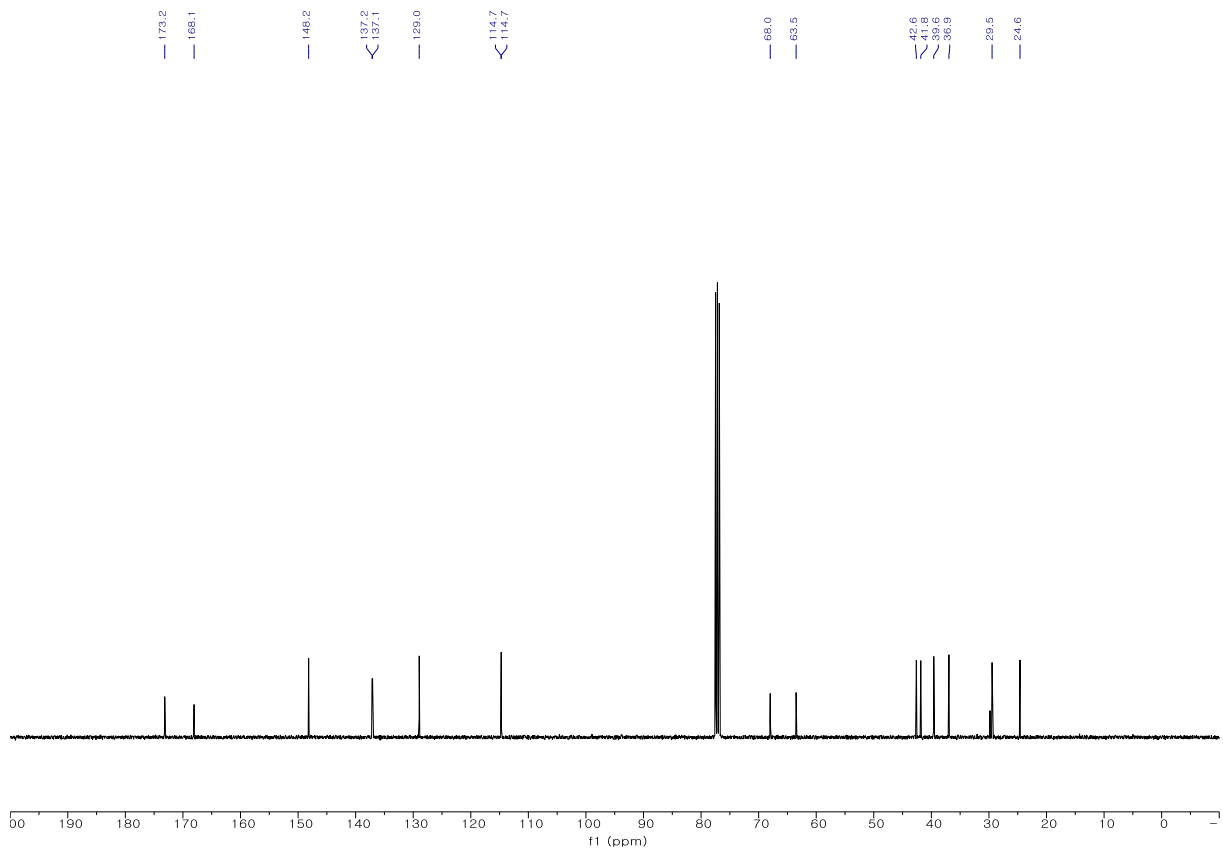

7.81  
7.81  
7.80  
7.79  
7.79  
7.78  
7.63  
7.53  
7.53  
7.01  
6.91  
5.51  
5.51  
5.49  
5.47  
5.47  
5.45  
5.45  
5.43  
5.43  
5.30  
5.30  
5.29  
5.28  
5.27  
5.27  
5.26  
5.26  
5.24  
5.24  
5.24  
5.22  
5.22  
5.20  
5.20  
5.19  
5.18  
5.18  
3.92  
3.92  
3.88  
3.88  
3.87  
3.86  
3.85  
3.85  
3.84  
3.84  
3.83  
3.83  
3.81  
3.81  
3.79  
3.79  
3.78  
3.78  
3.76  
3.76  
3.66  
3.66  
3.60  
3.60  
3.53  
3.53  
3.52  
3.52  
3.19  
3.19  
2.45  
2.45  
2.44  
2.44  
2.43  
2.43  
2.39  
2.39  
2.37  
2.37  
2.36  
2.36  
2.33  
2.33  
2.32  
2.32  
2.31  
2.31  
2.28  
2.28  
2.16  
2.16  
1.46  
1.46  
1.39  
1.39  
0.11  
0.11

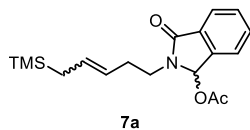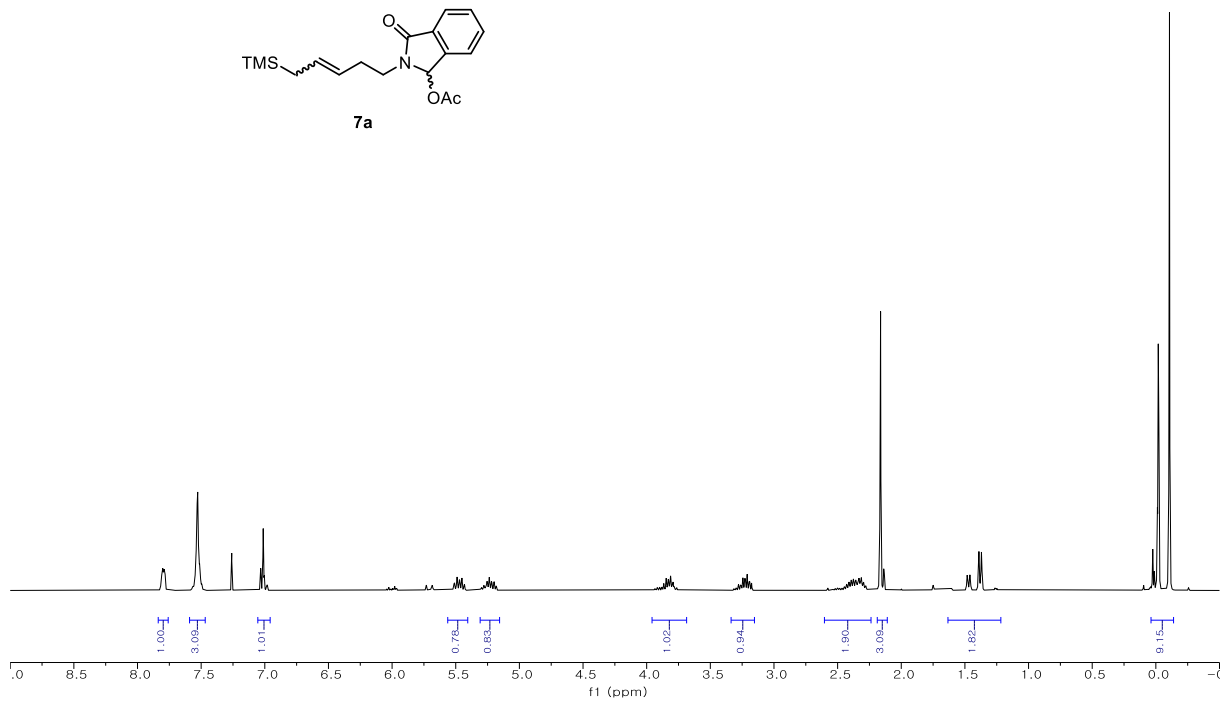

171.3  
167.9  
142.7  
141.1  
132.3  
129.7  
129.7  
124.5  
123.9  
123.7  
81.3  
40.3  
31.8  
22.2  
21.2  
2.0

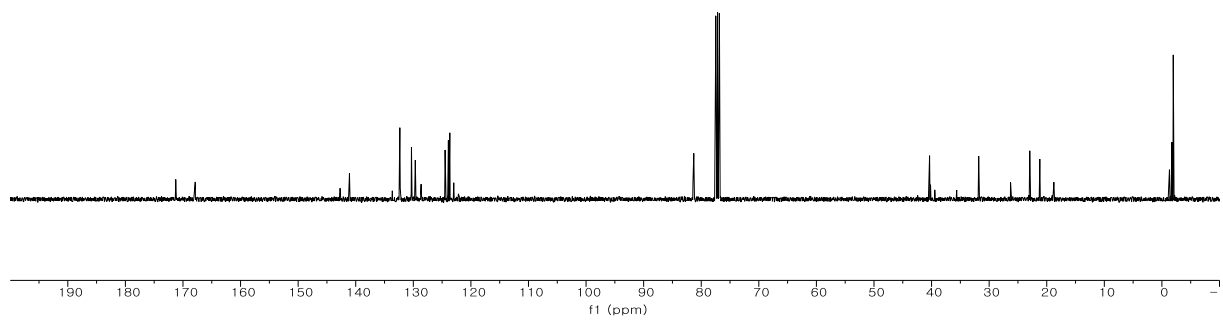

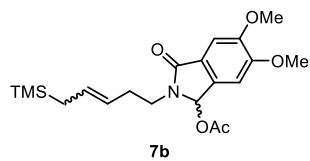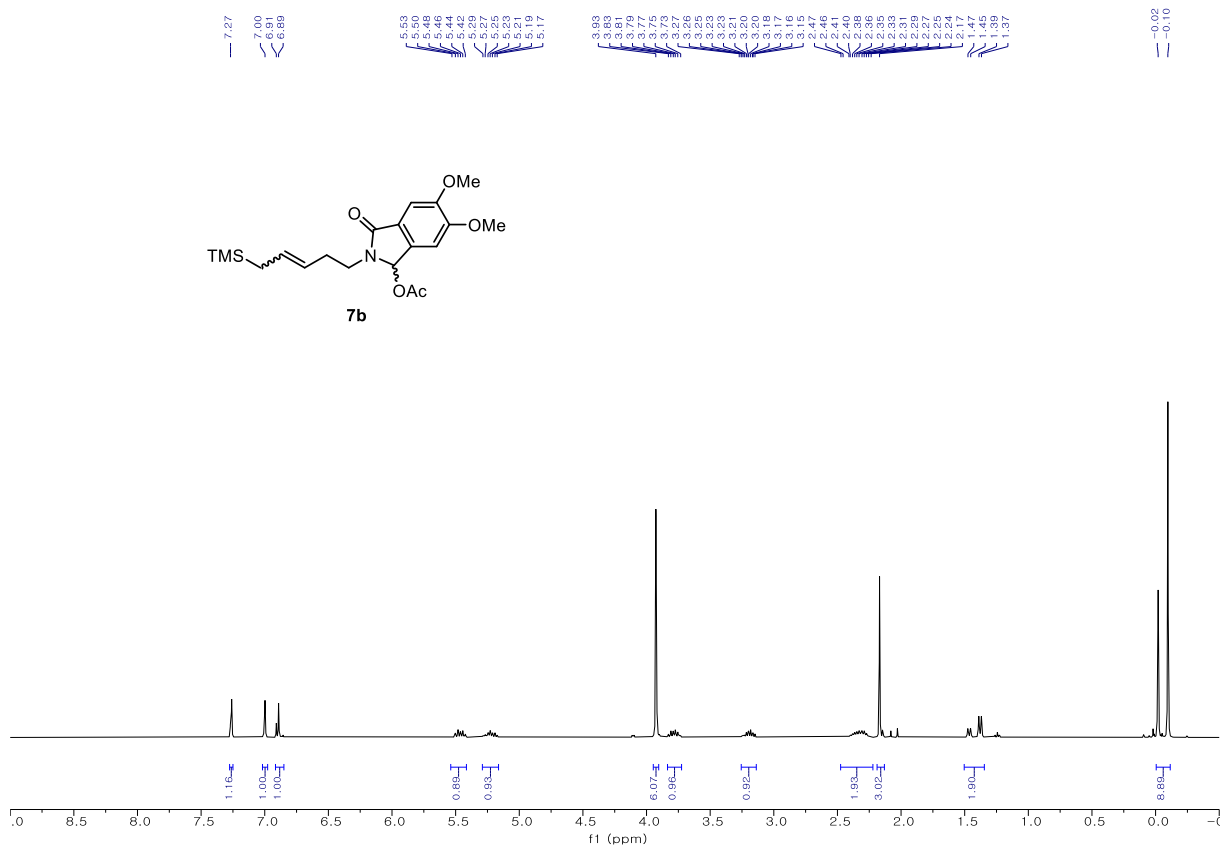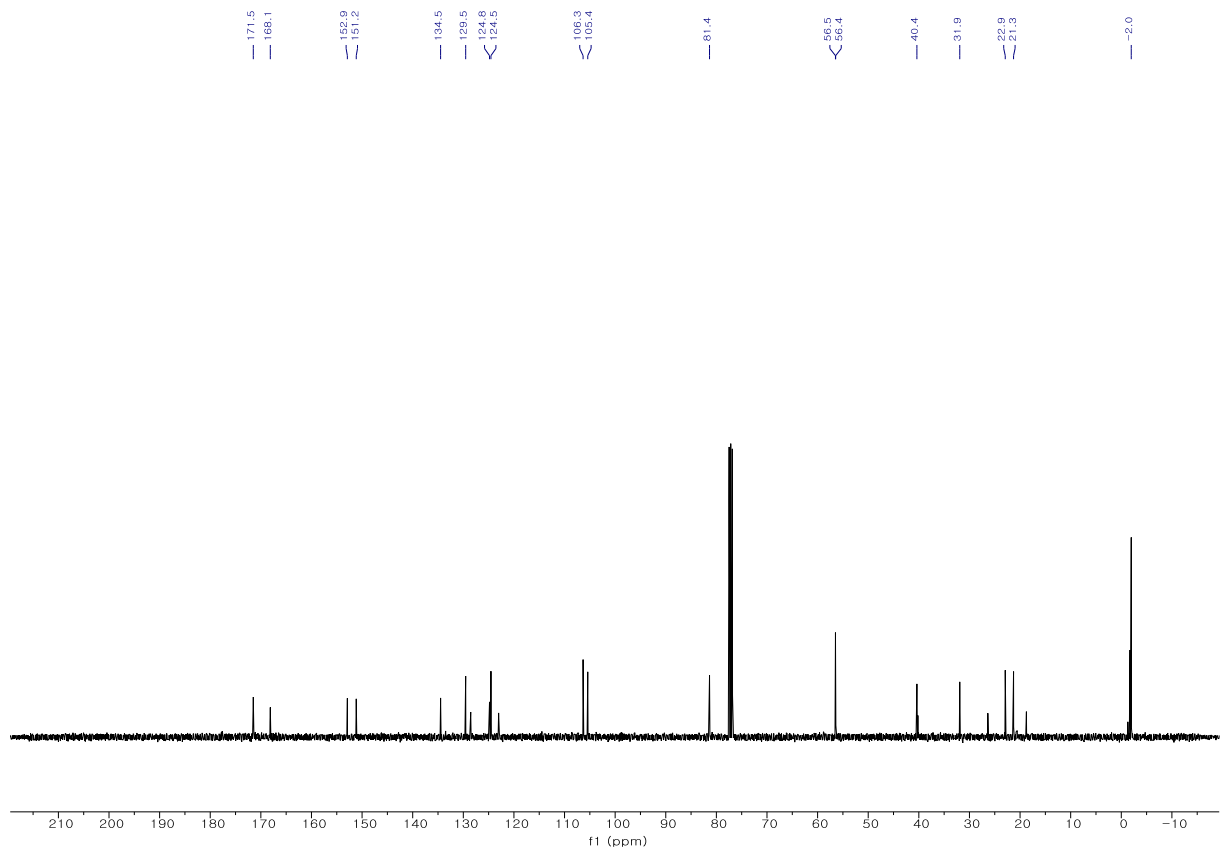

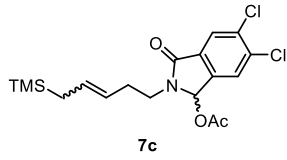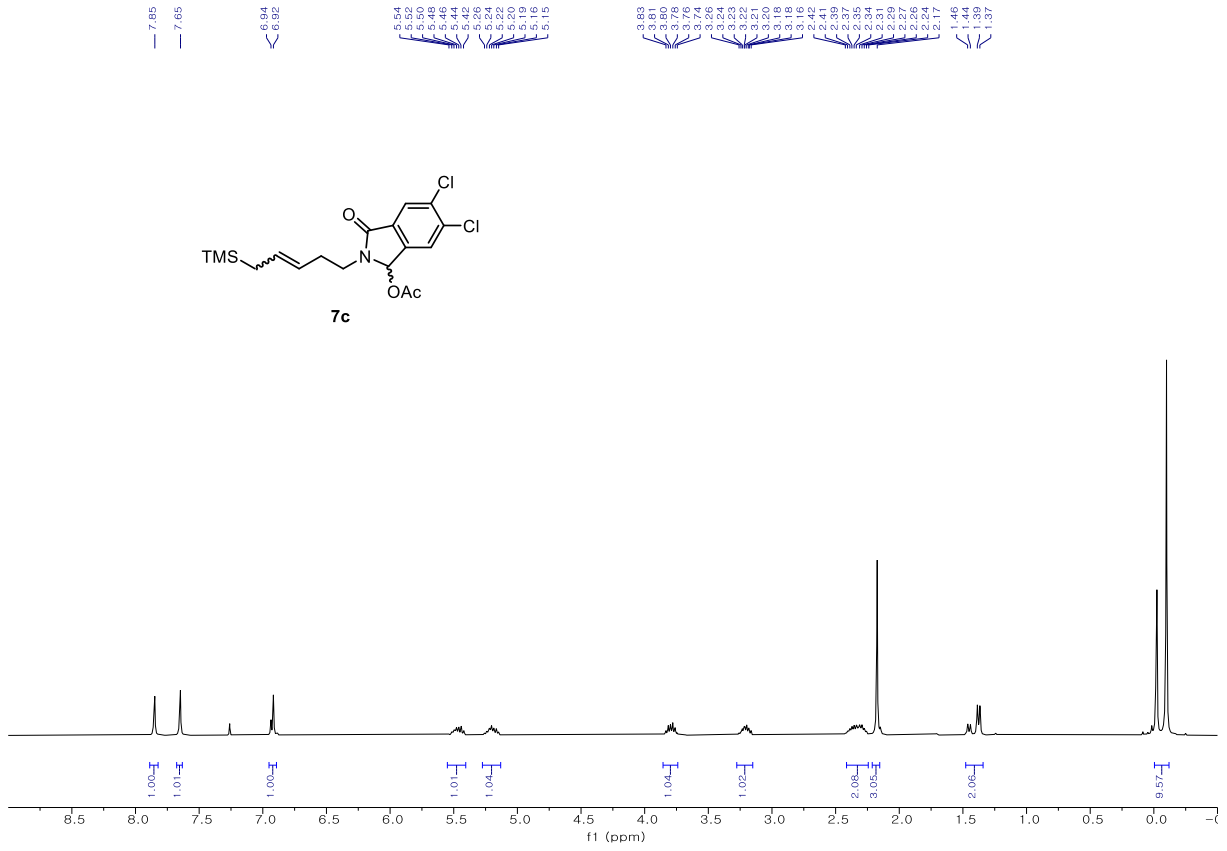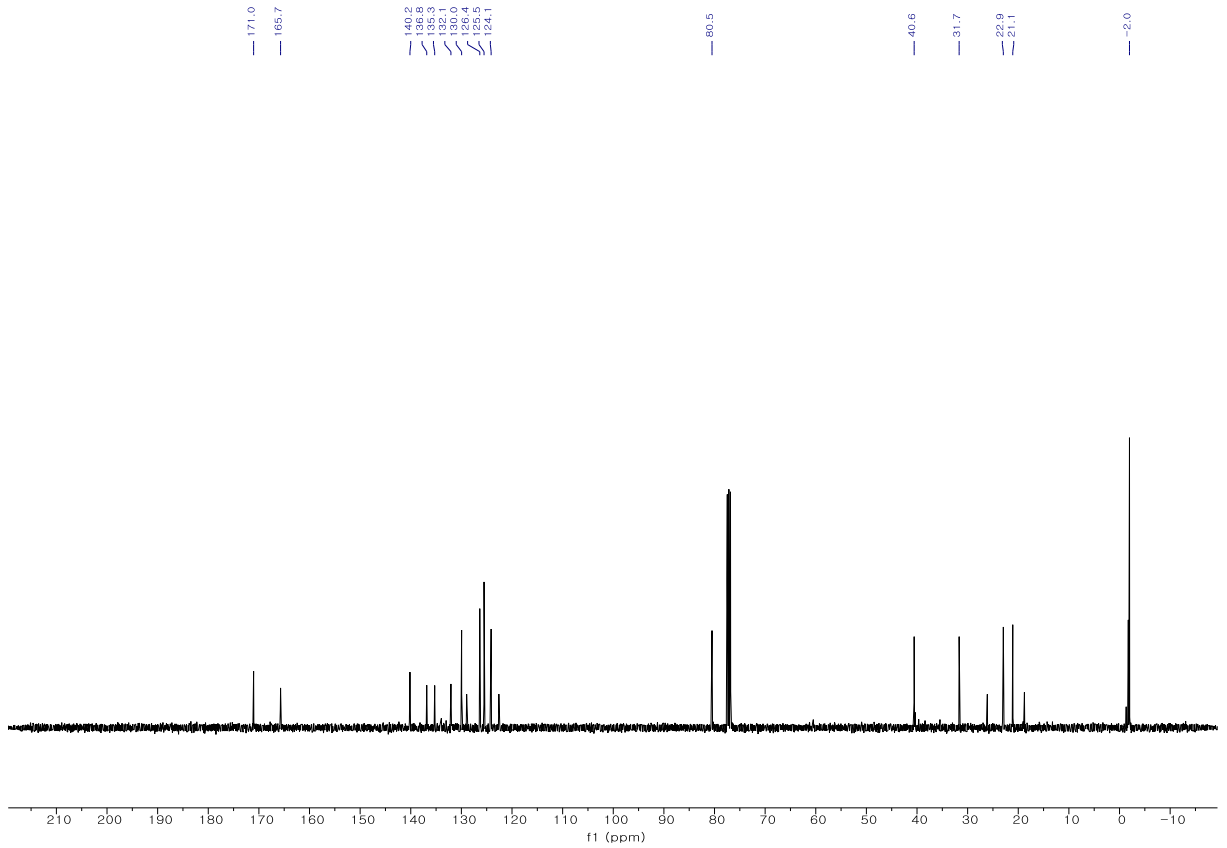



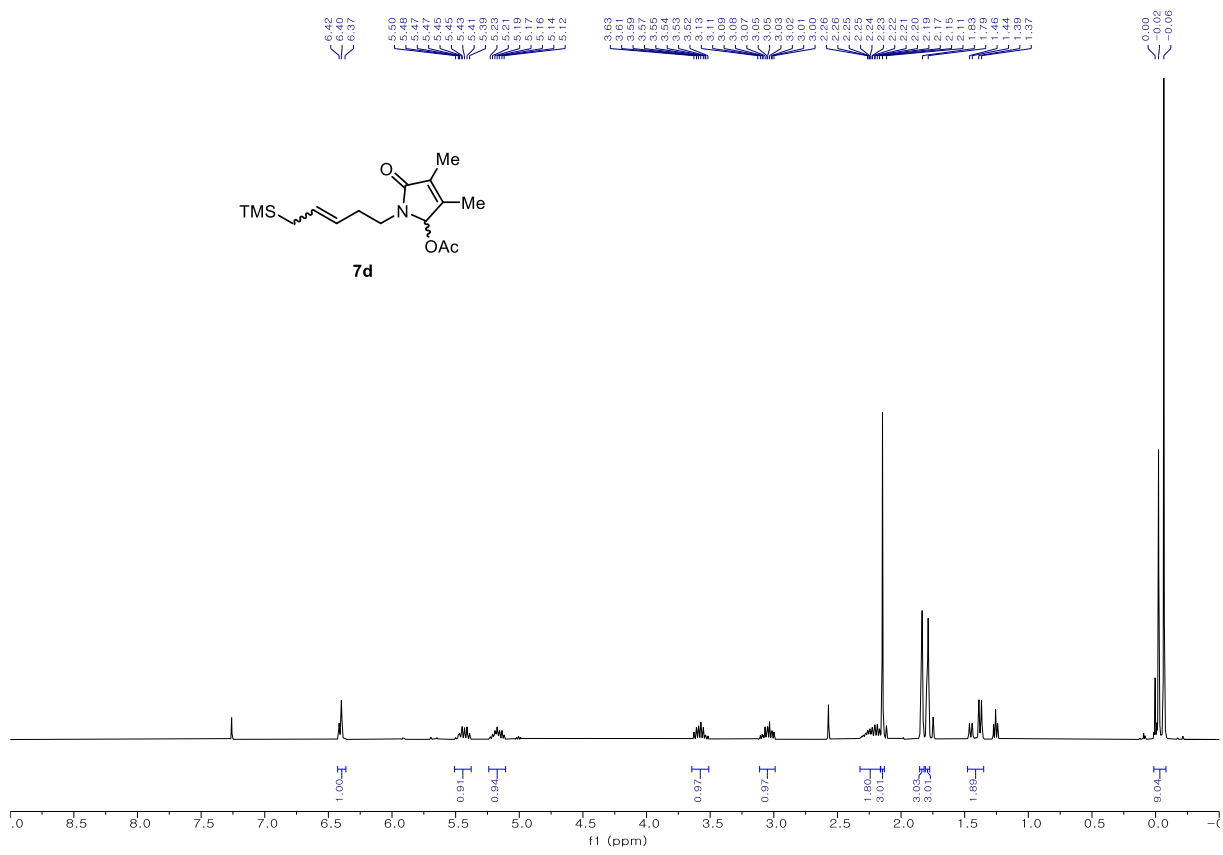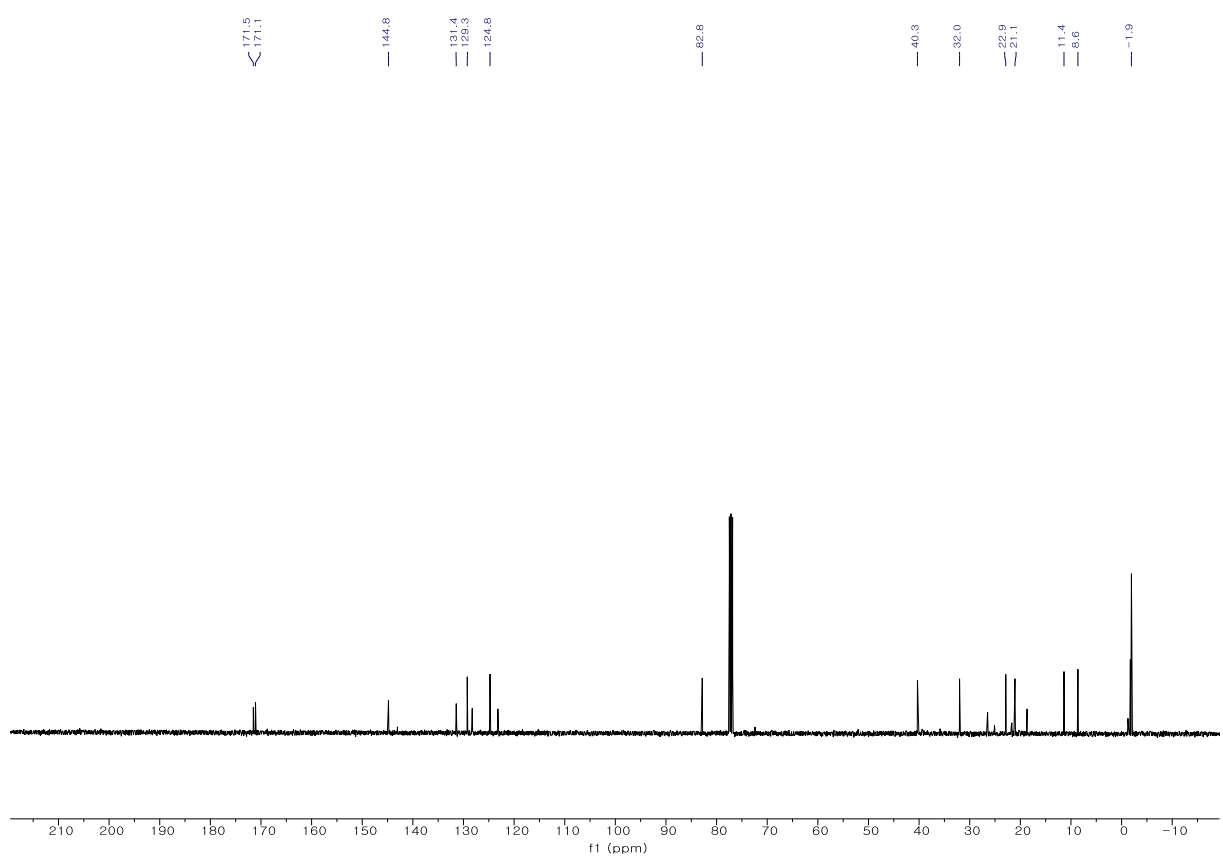

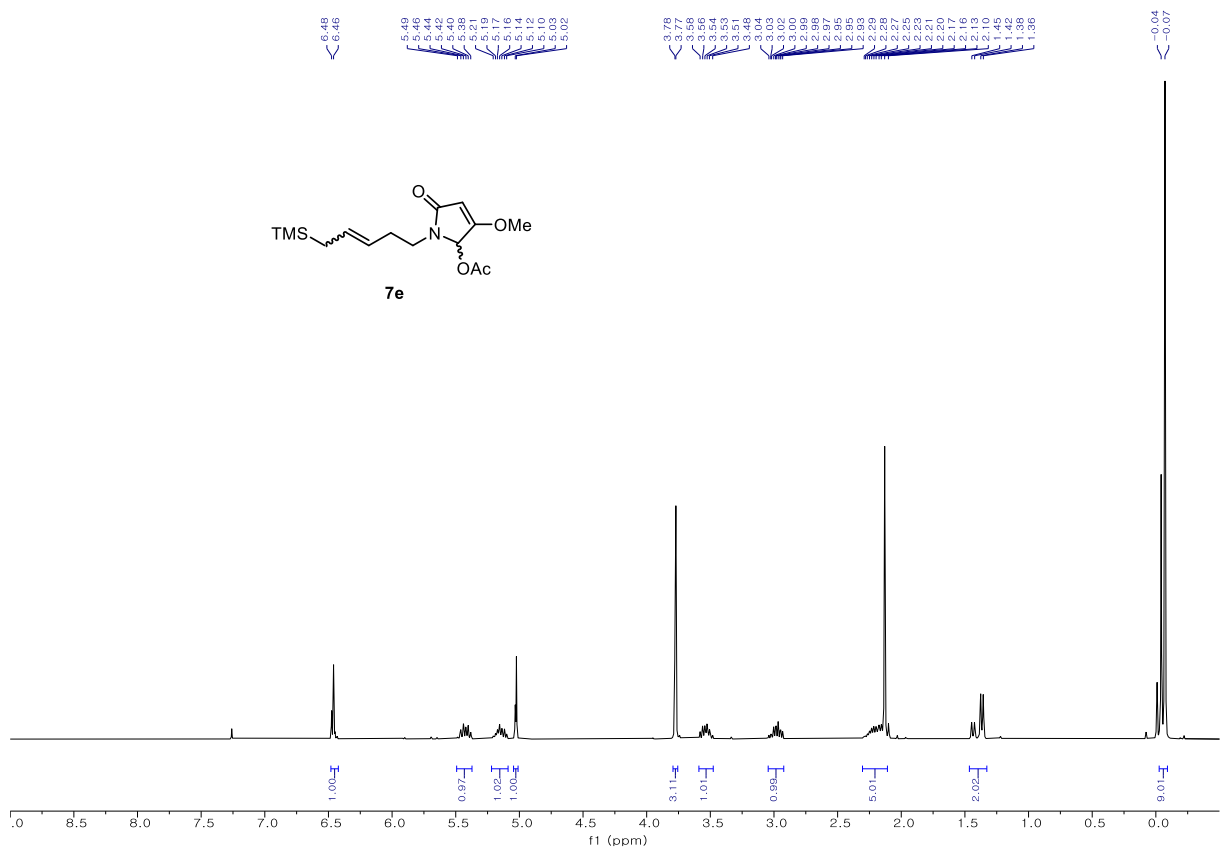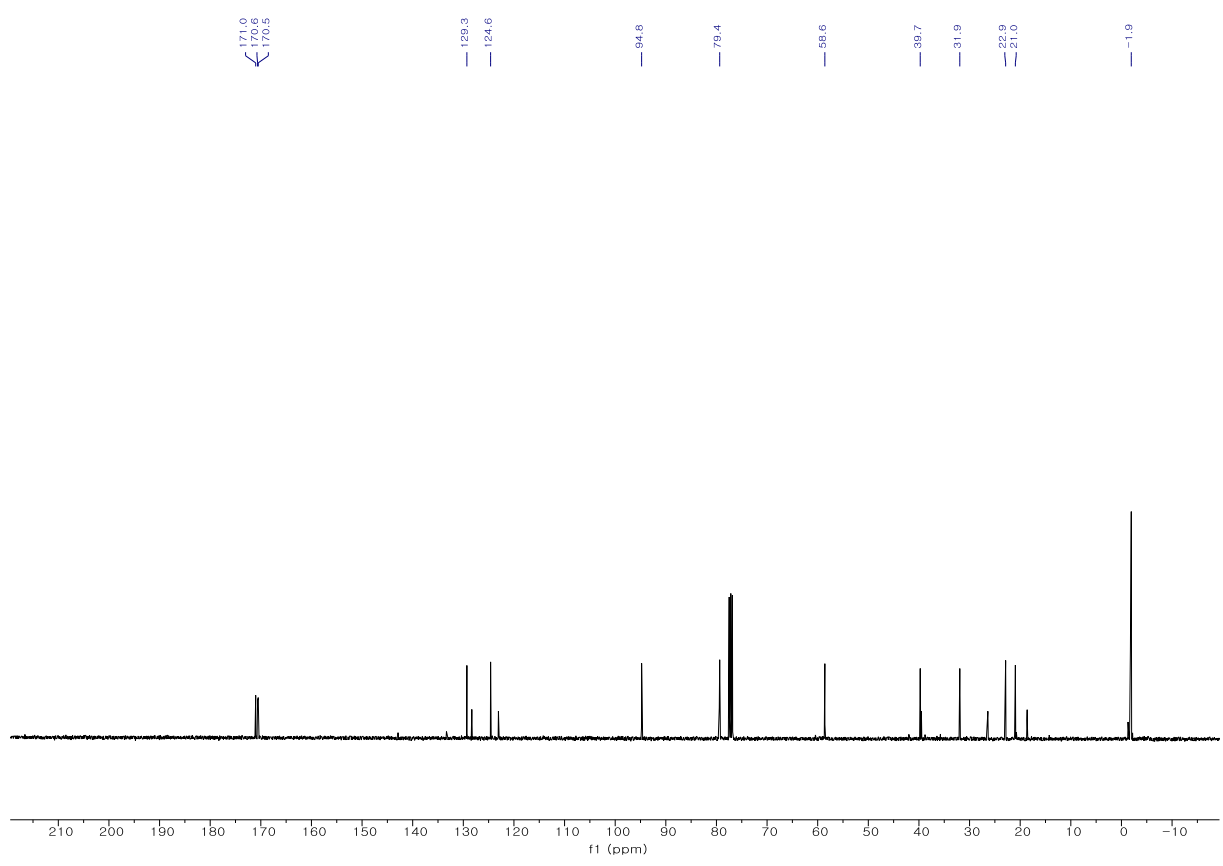

7.79  
7.53  
7.51  
7.49  
7.43  
7.41  
7.36

5.09  
5.05  
5.03  
4.96  
4.89  
4.88  
4.80

3.83  
3.81  
3.76  
3.48  
3.45  
3.13  
3.12  
3.10  
2.58  
2.57  
2.56  
2.53  
2.31  
2.30  
2.28

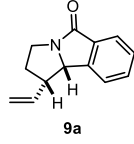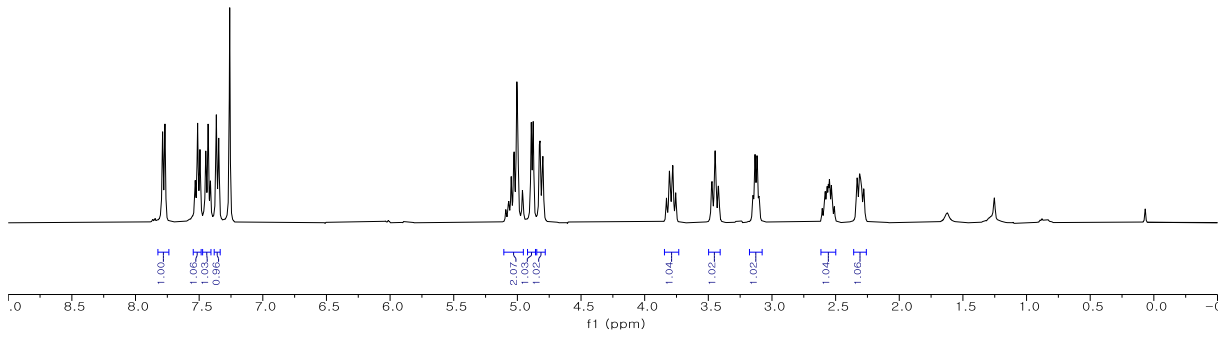

171.4  
143.9  
135.0  
134.8  
131.6  
128.9  
123.5  
116.7  
67.7  
42.9  
40.8  
34.7

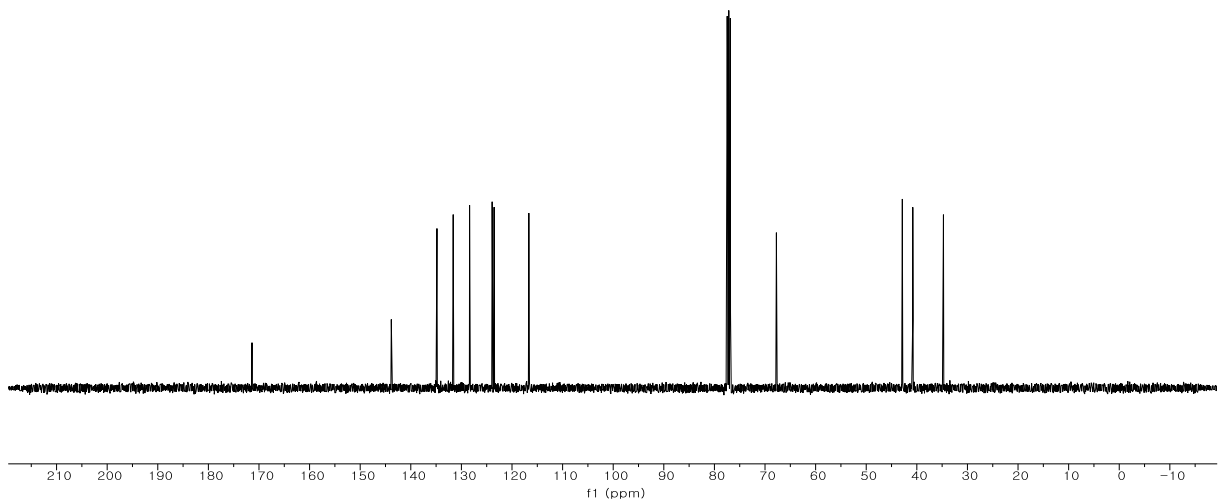

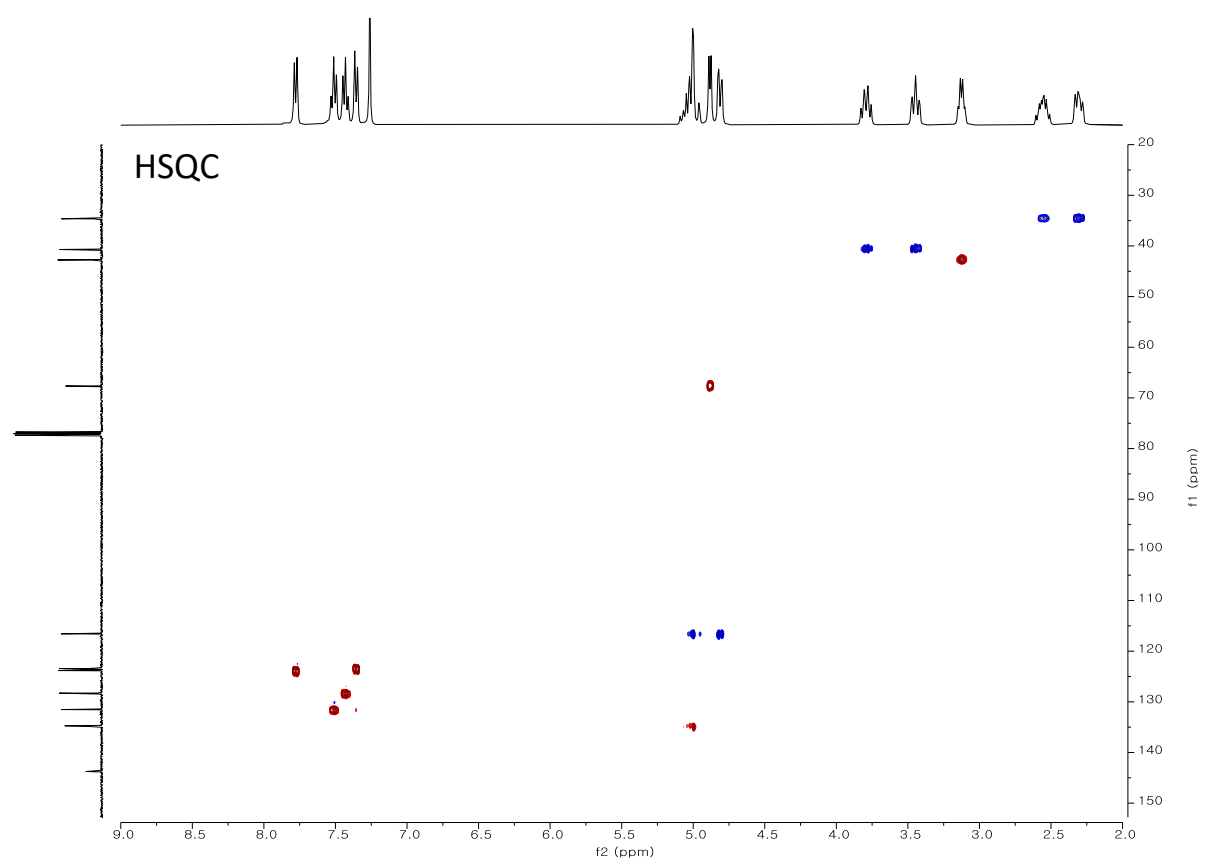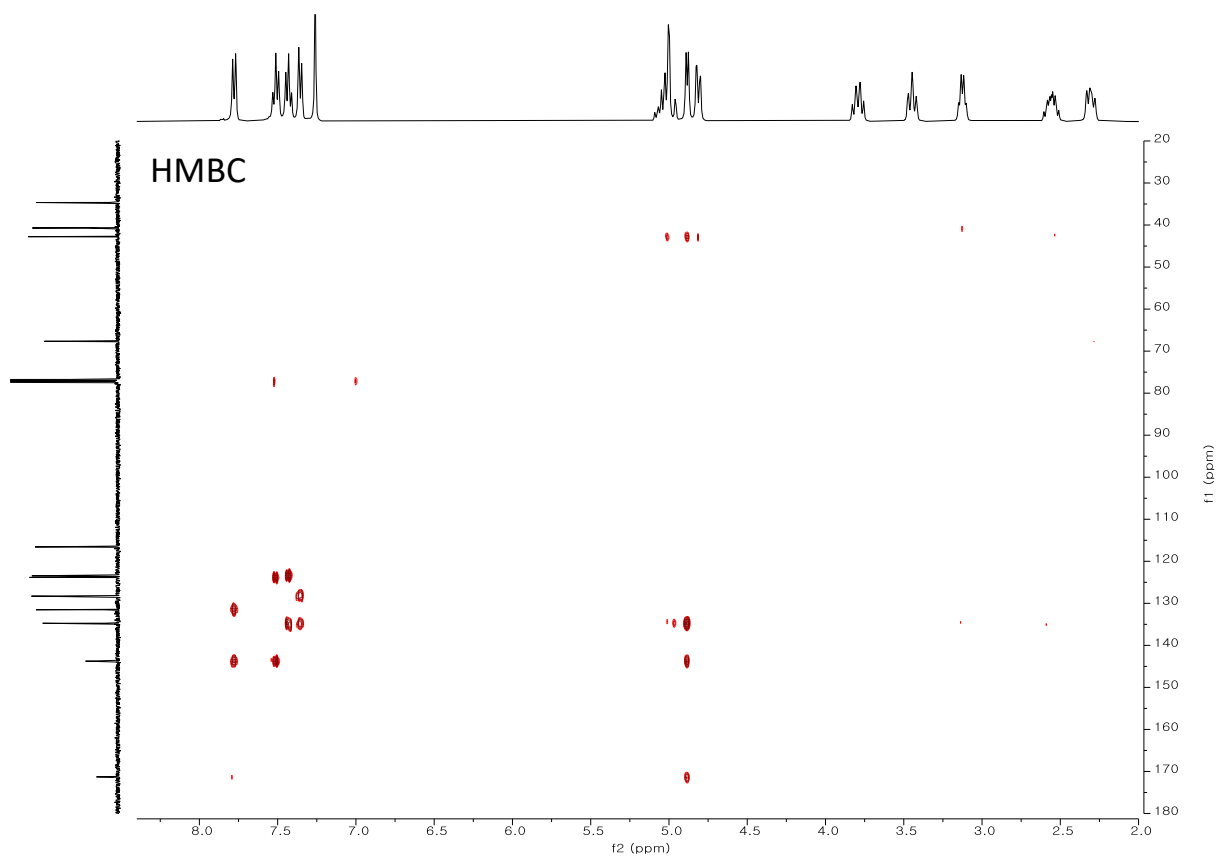

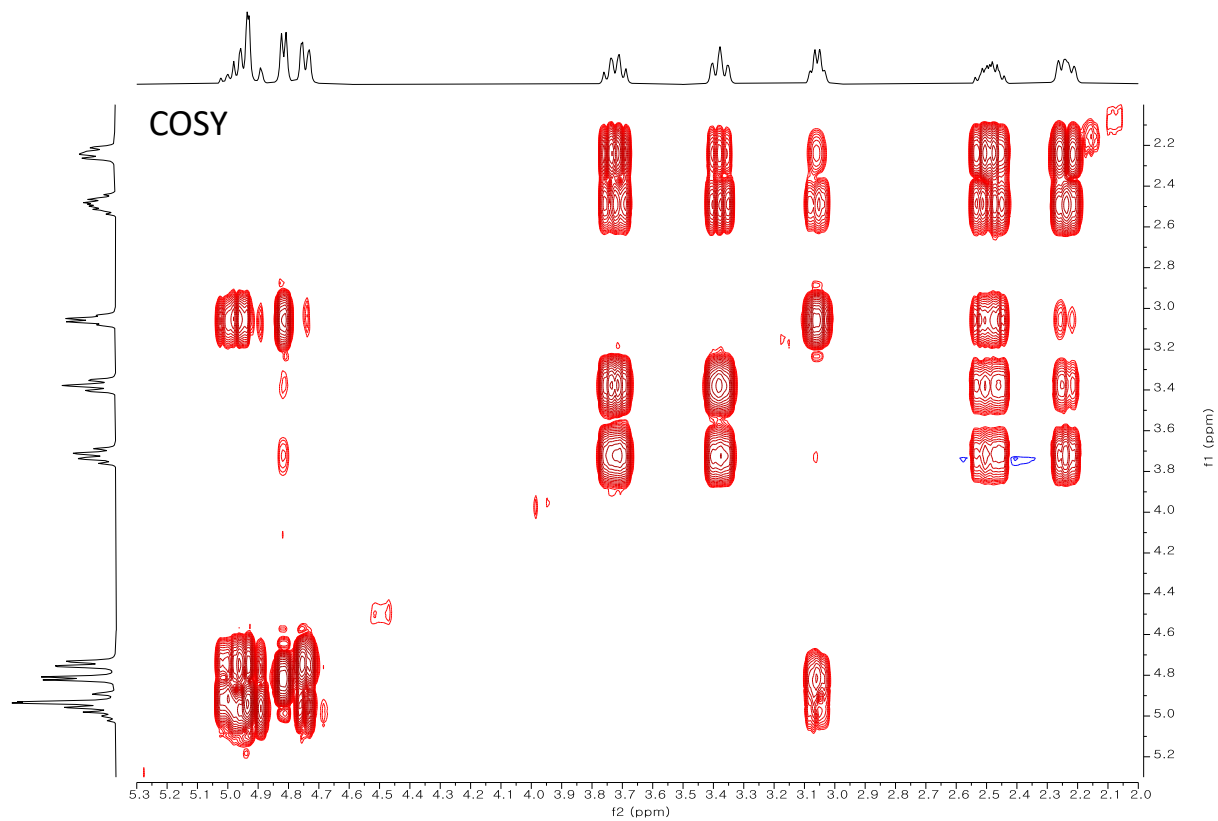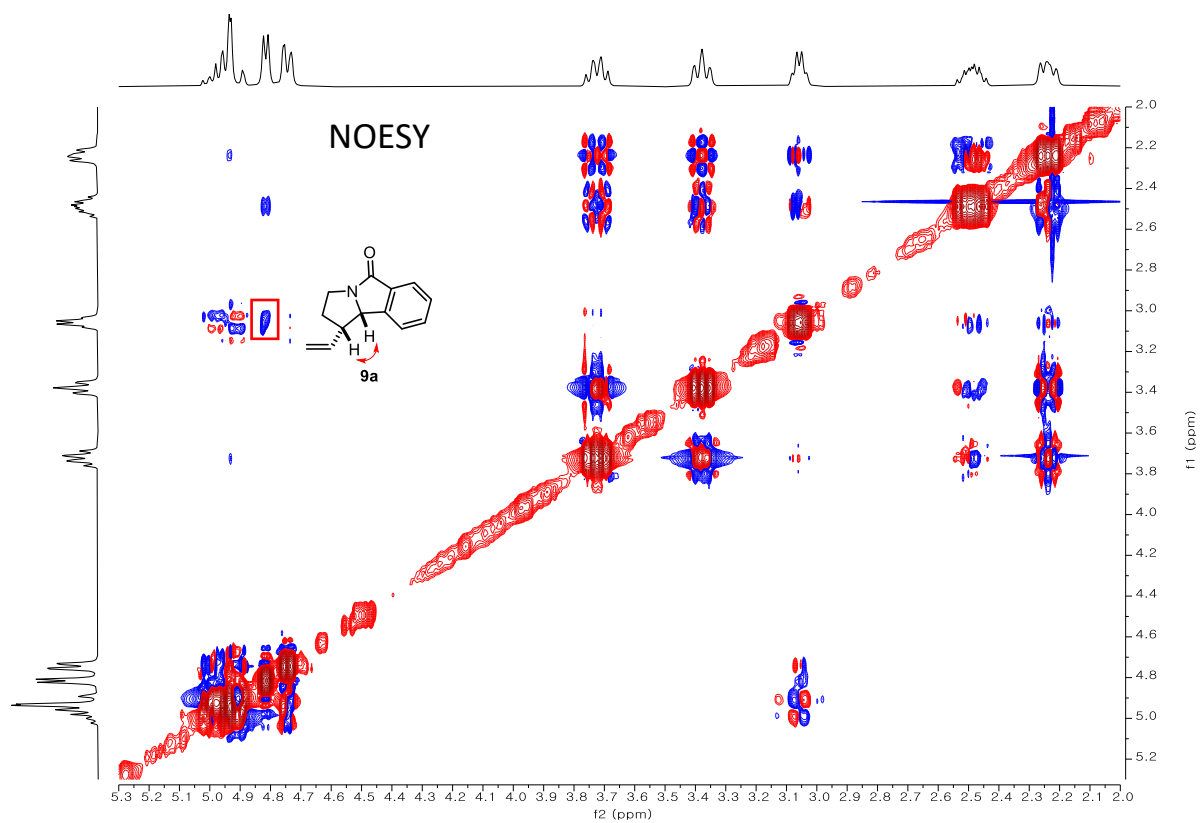

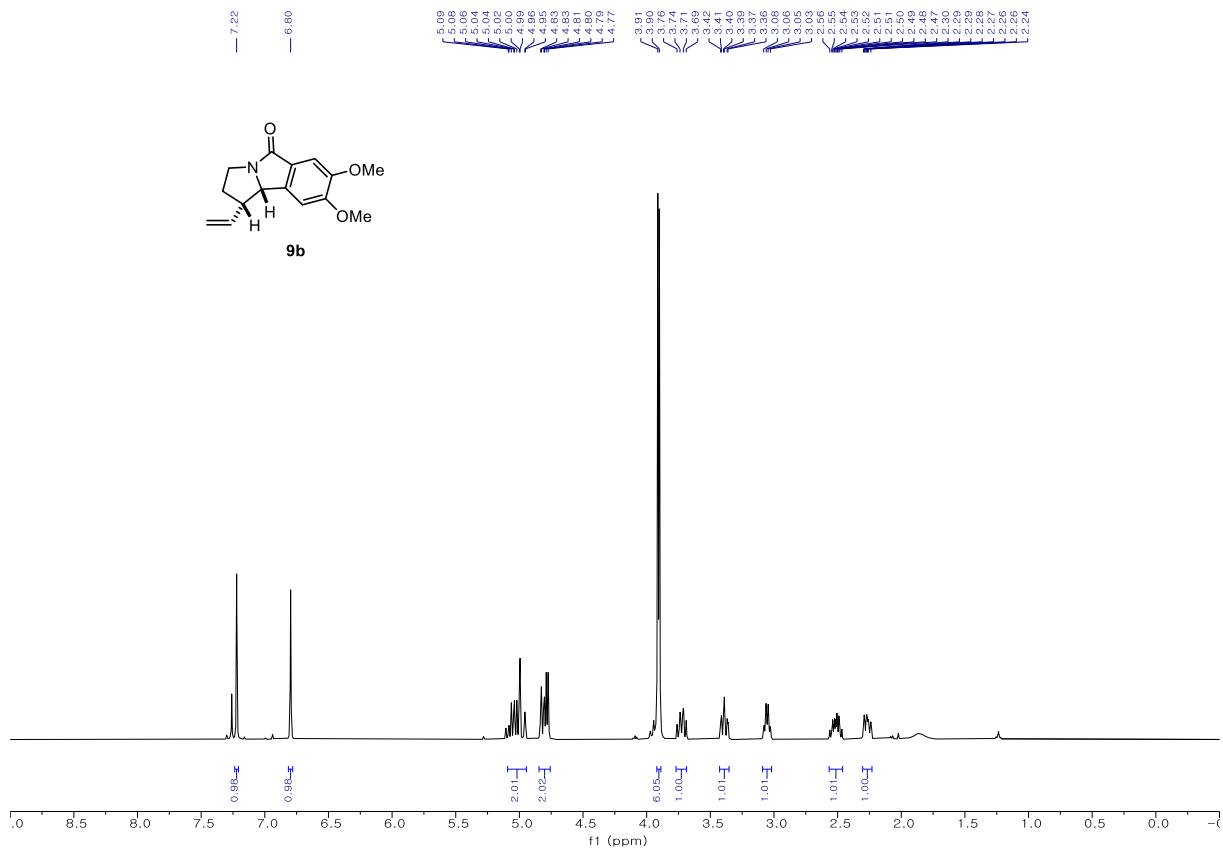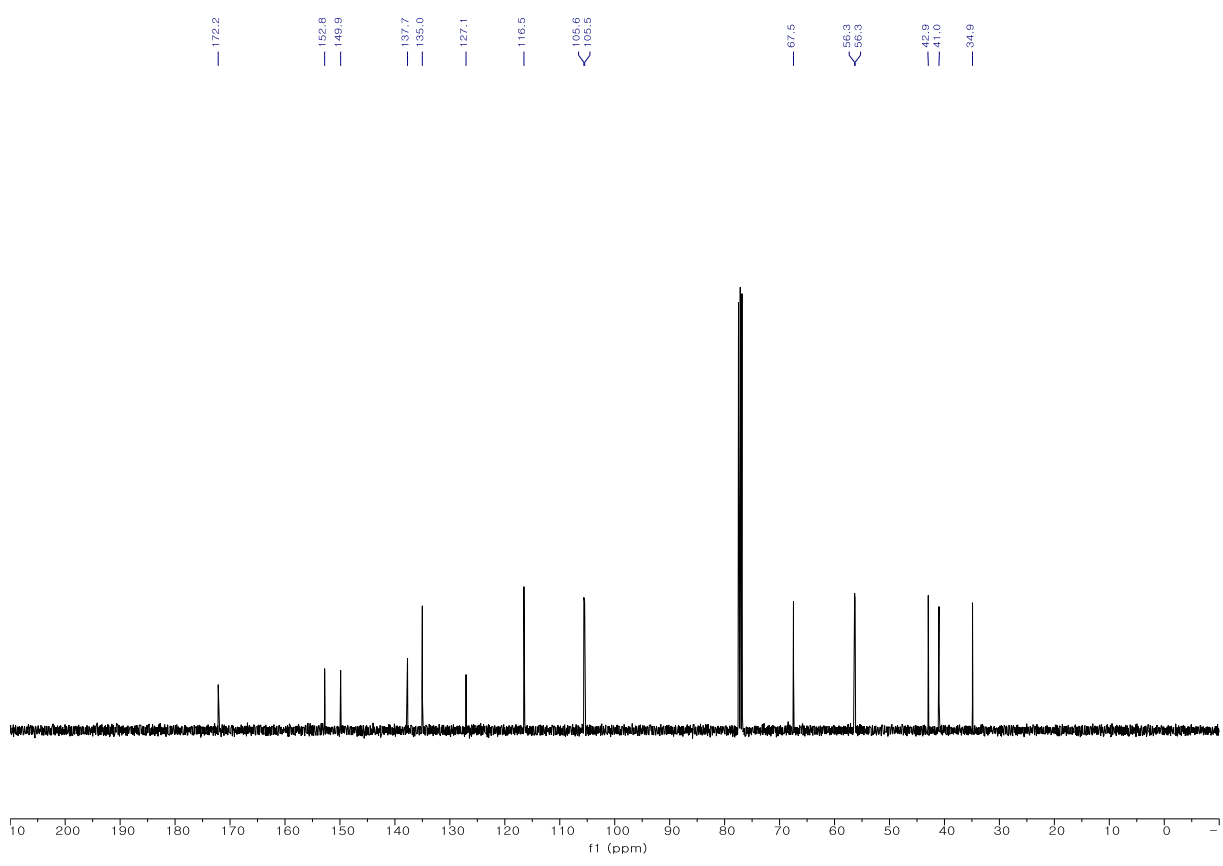

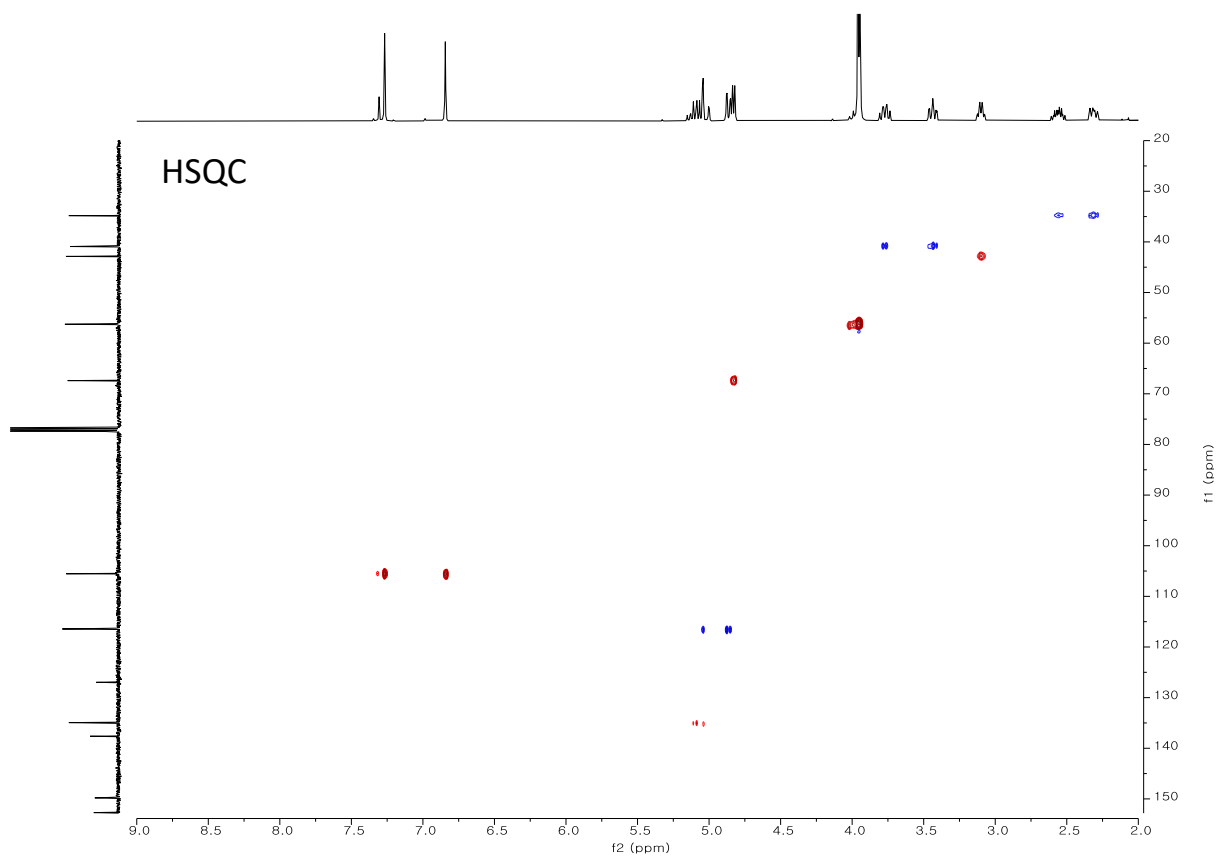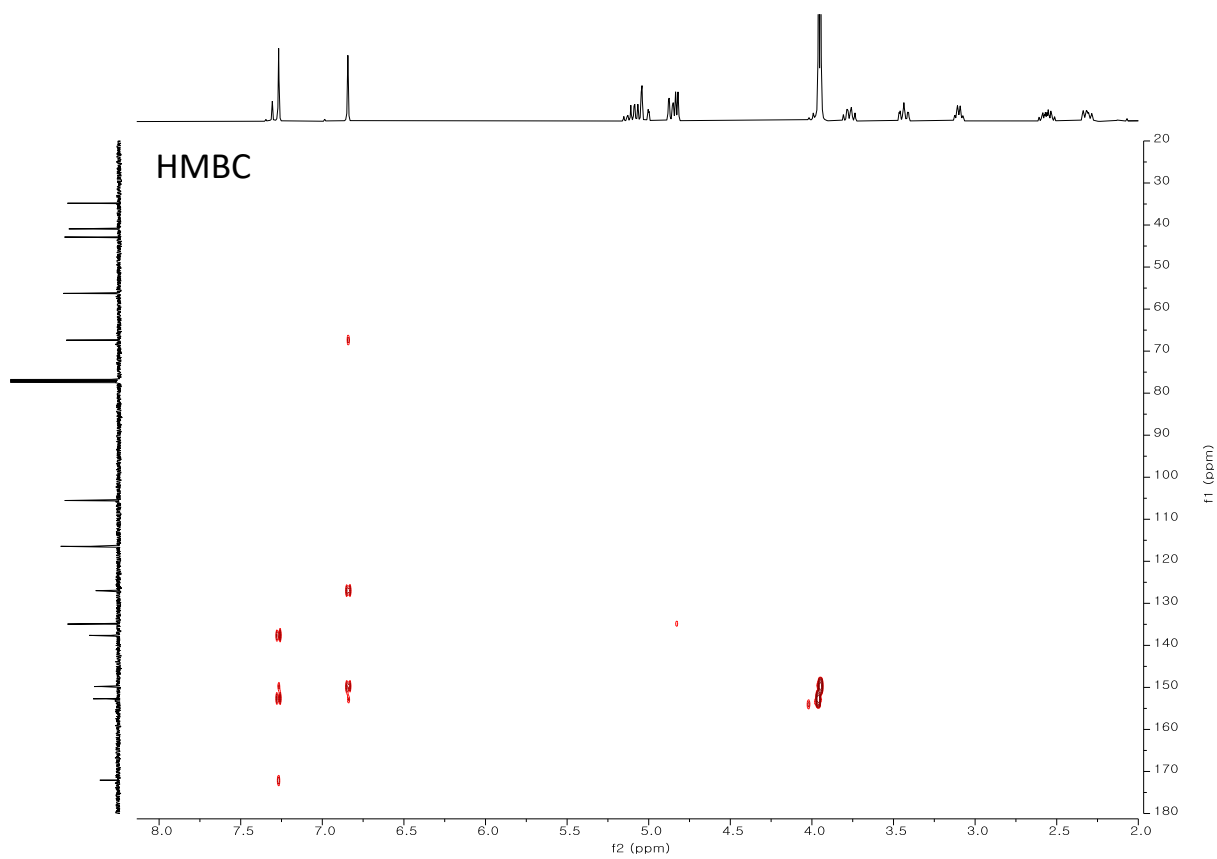

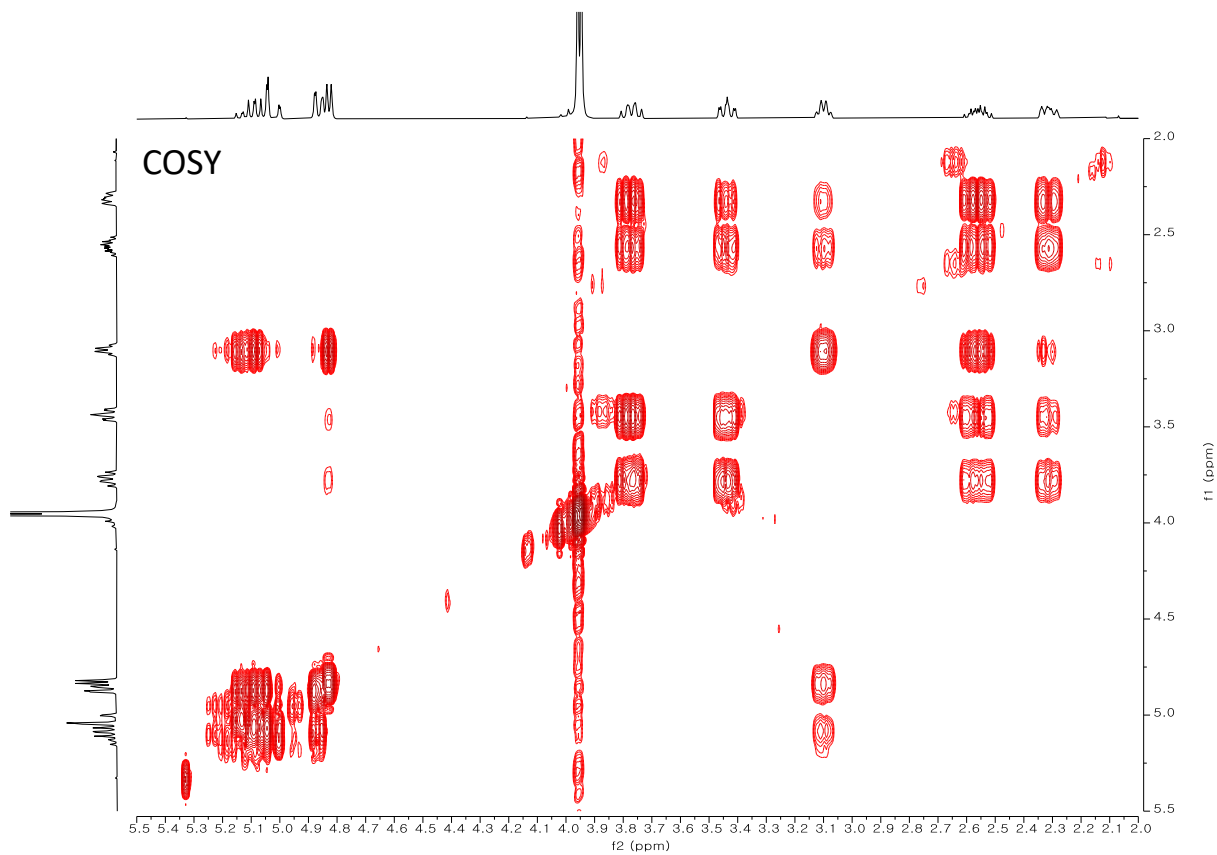



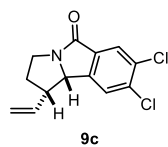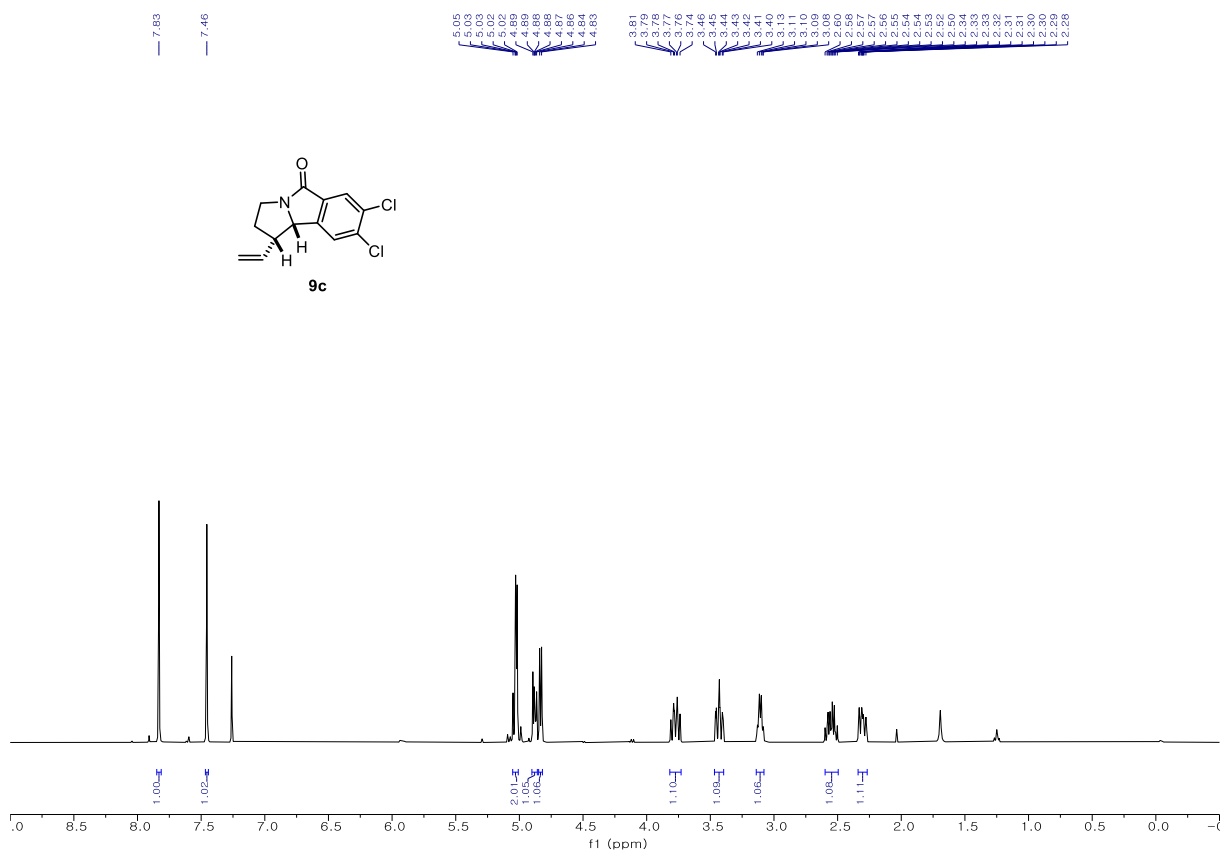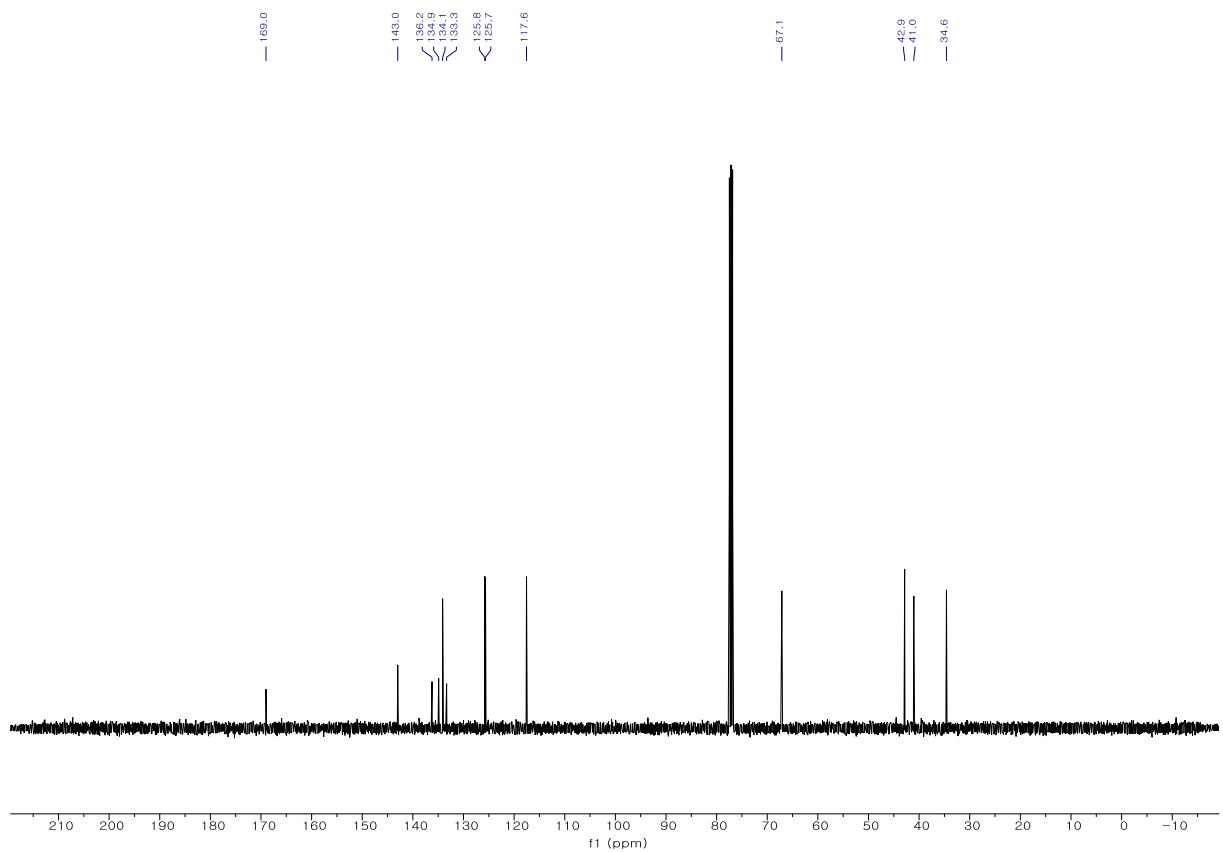

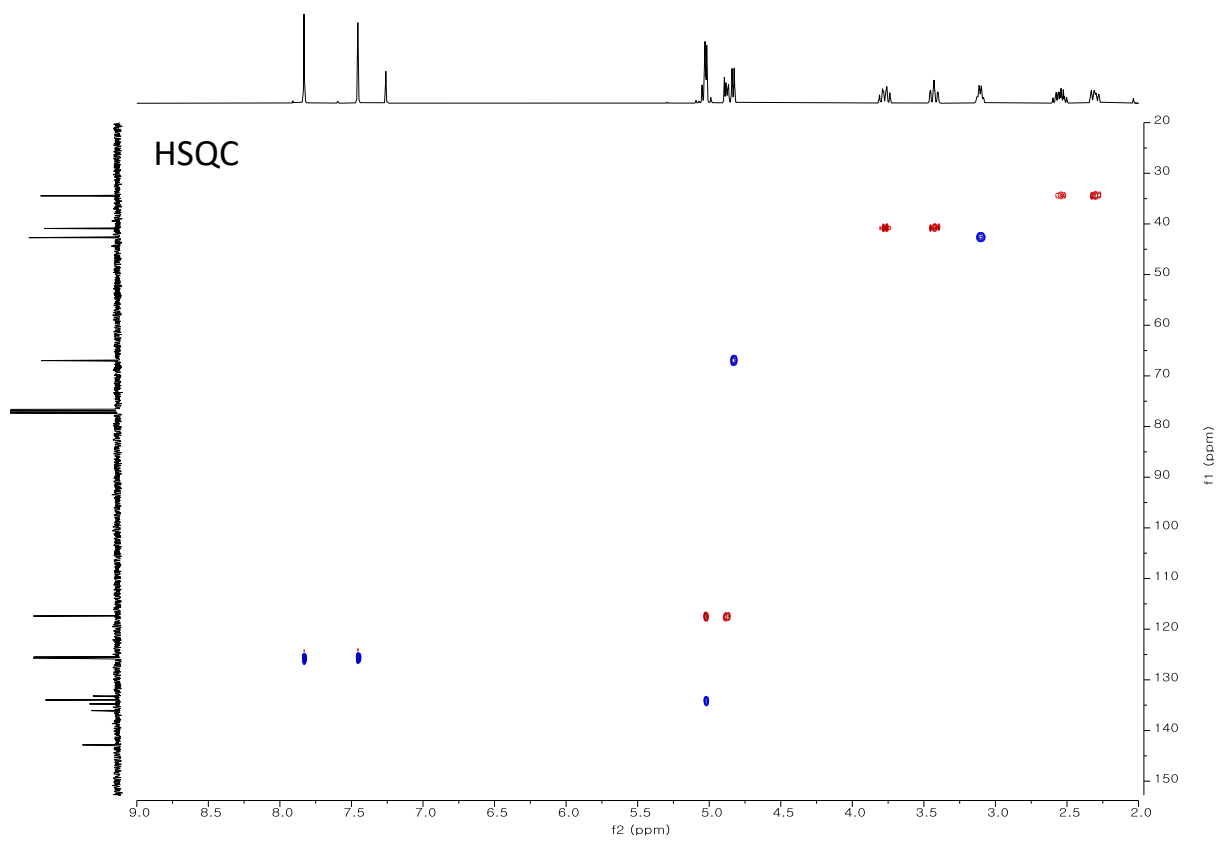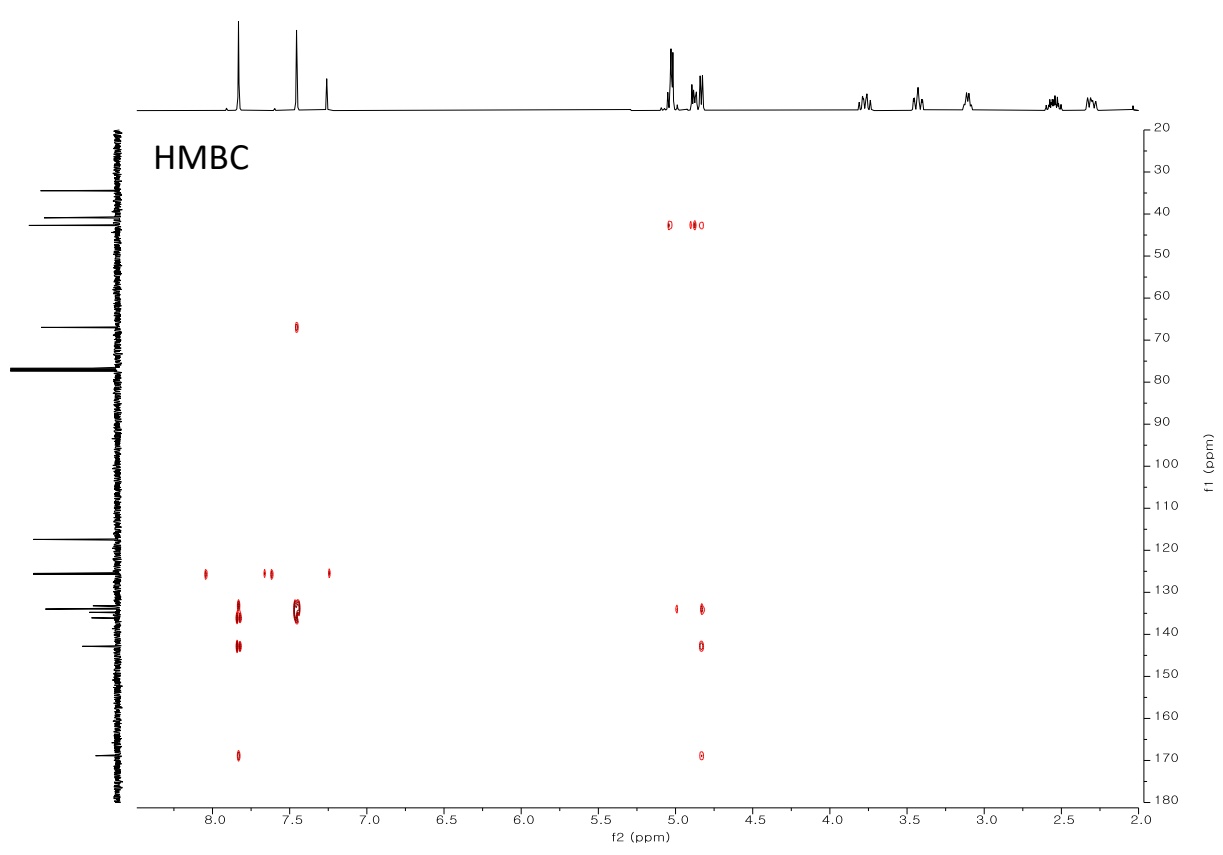

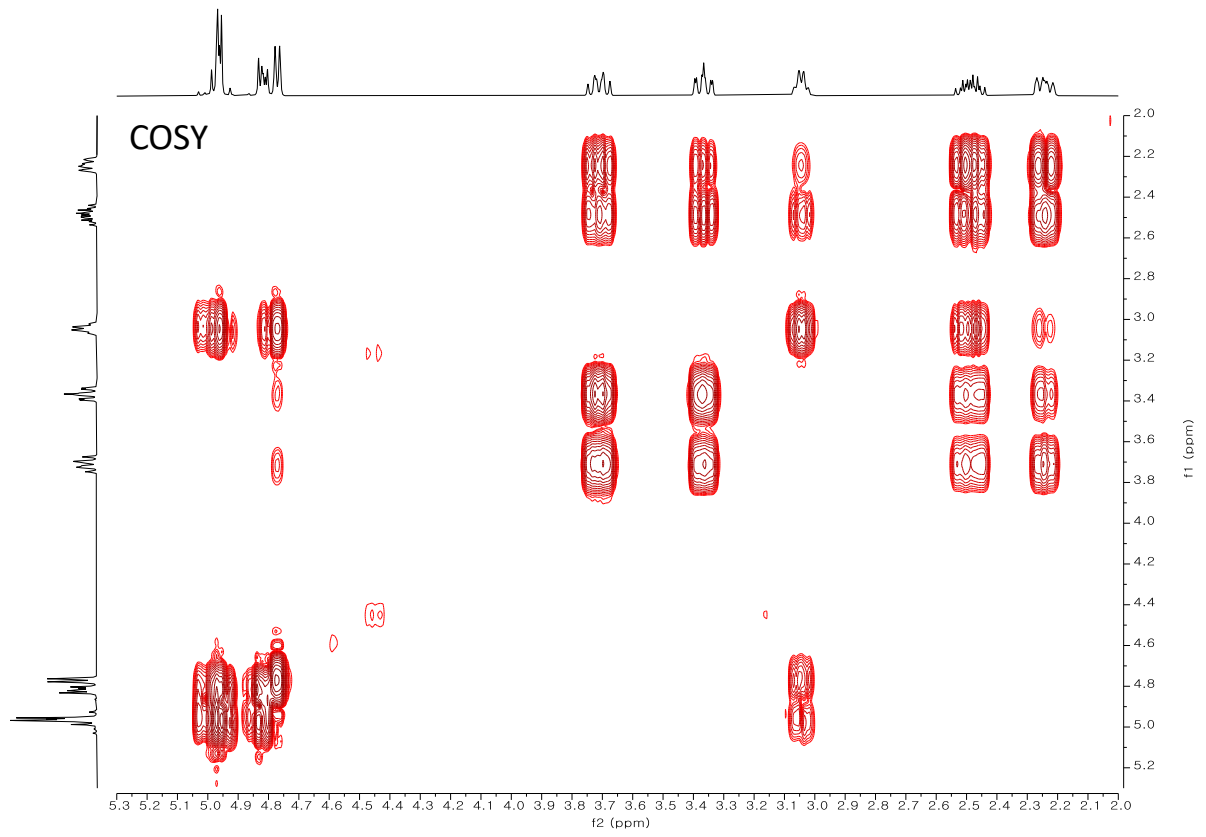

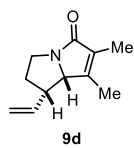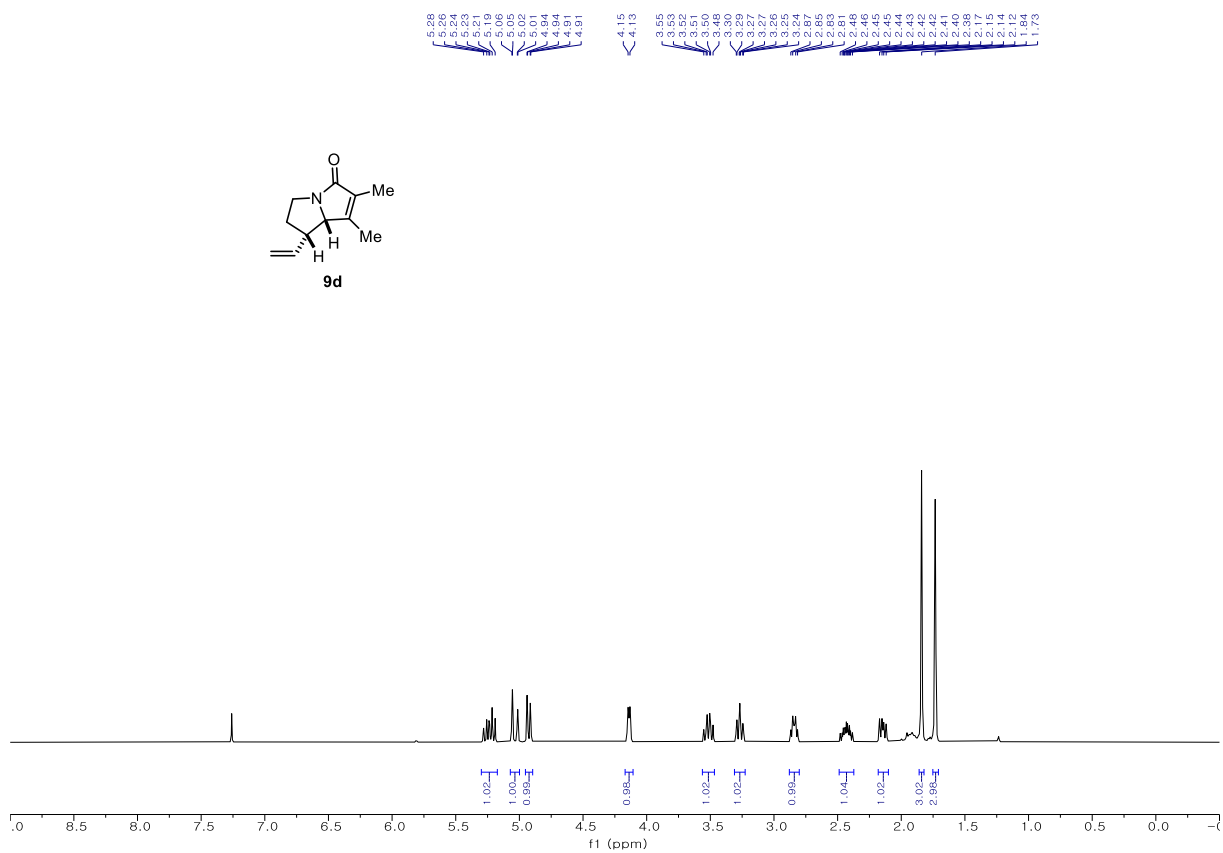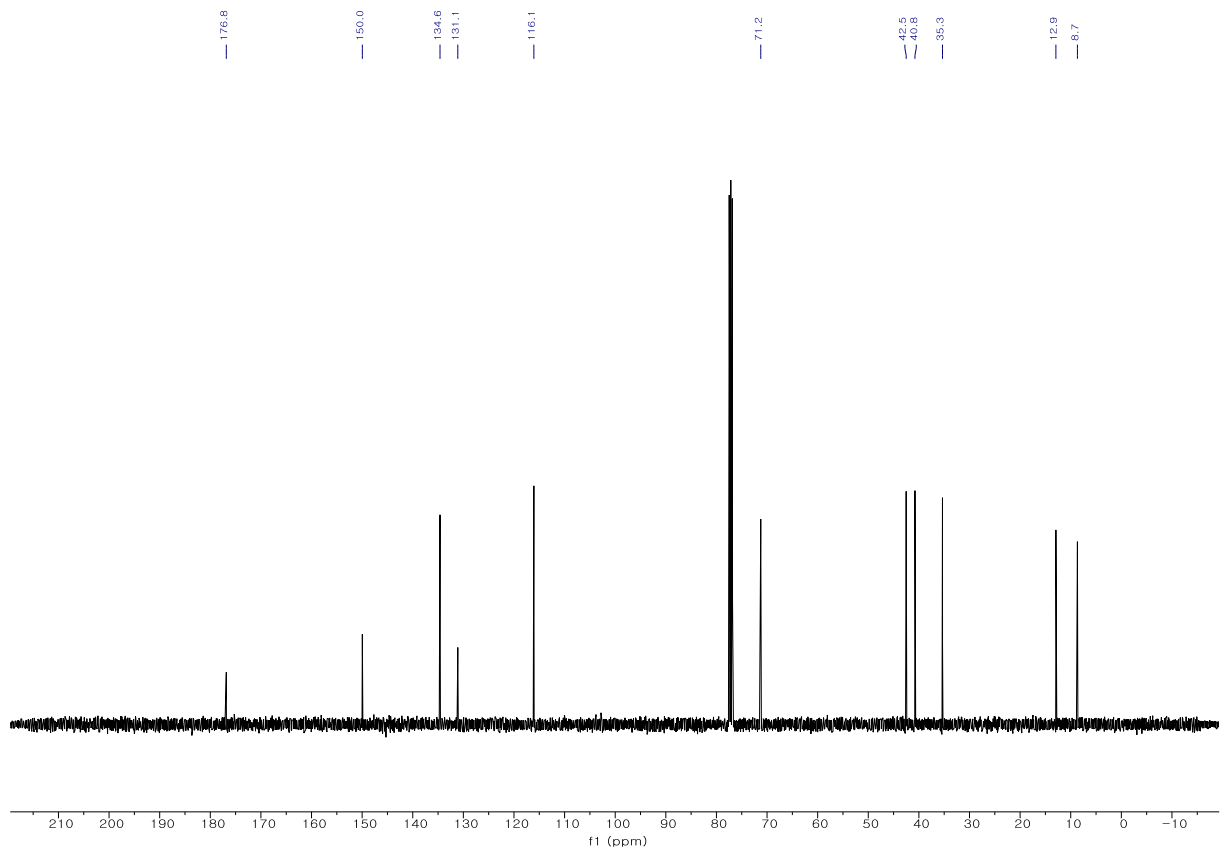

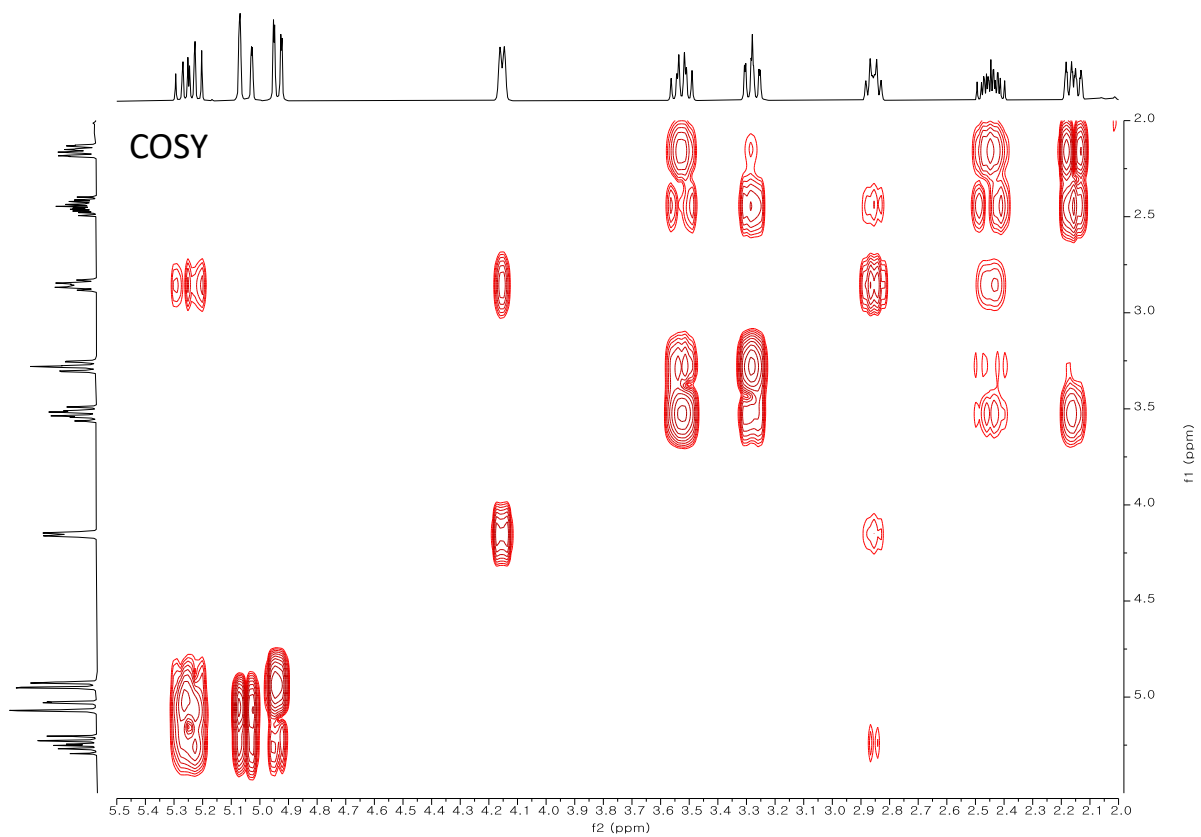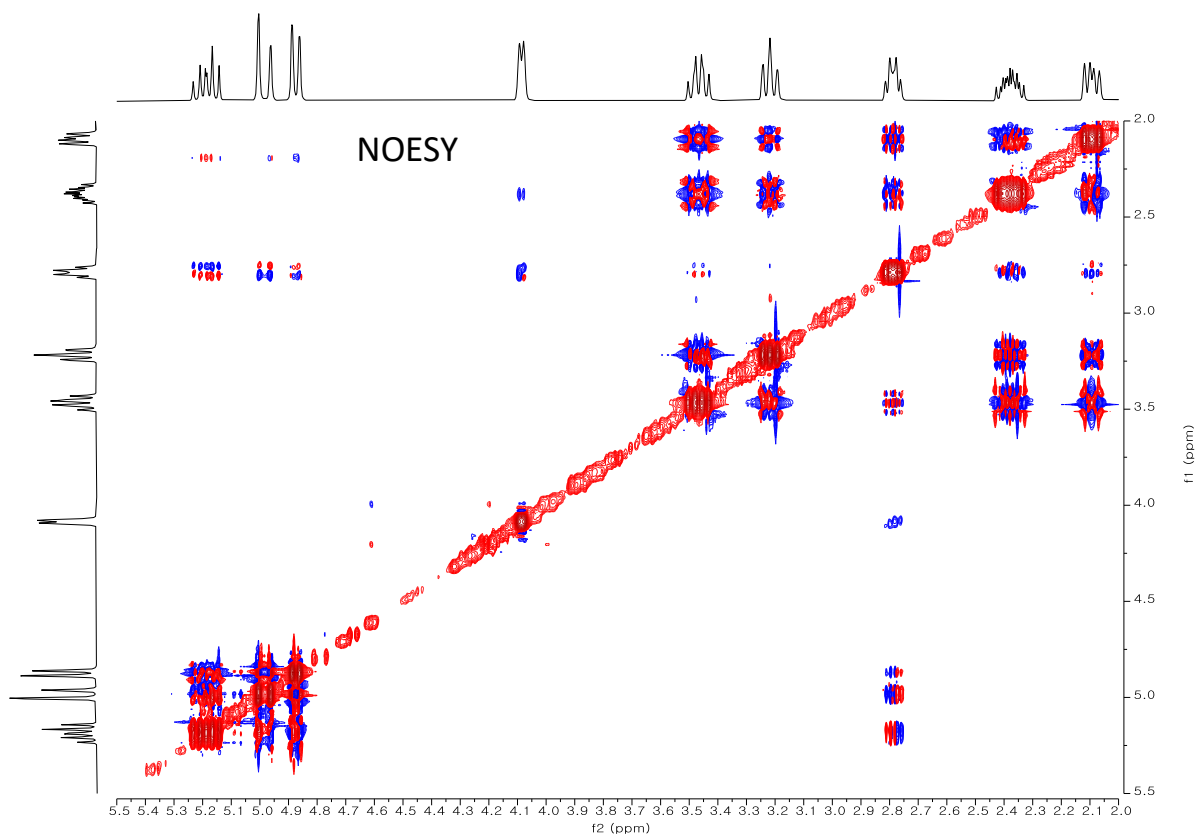

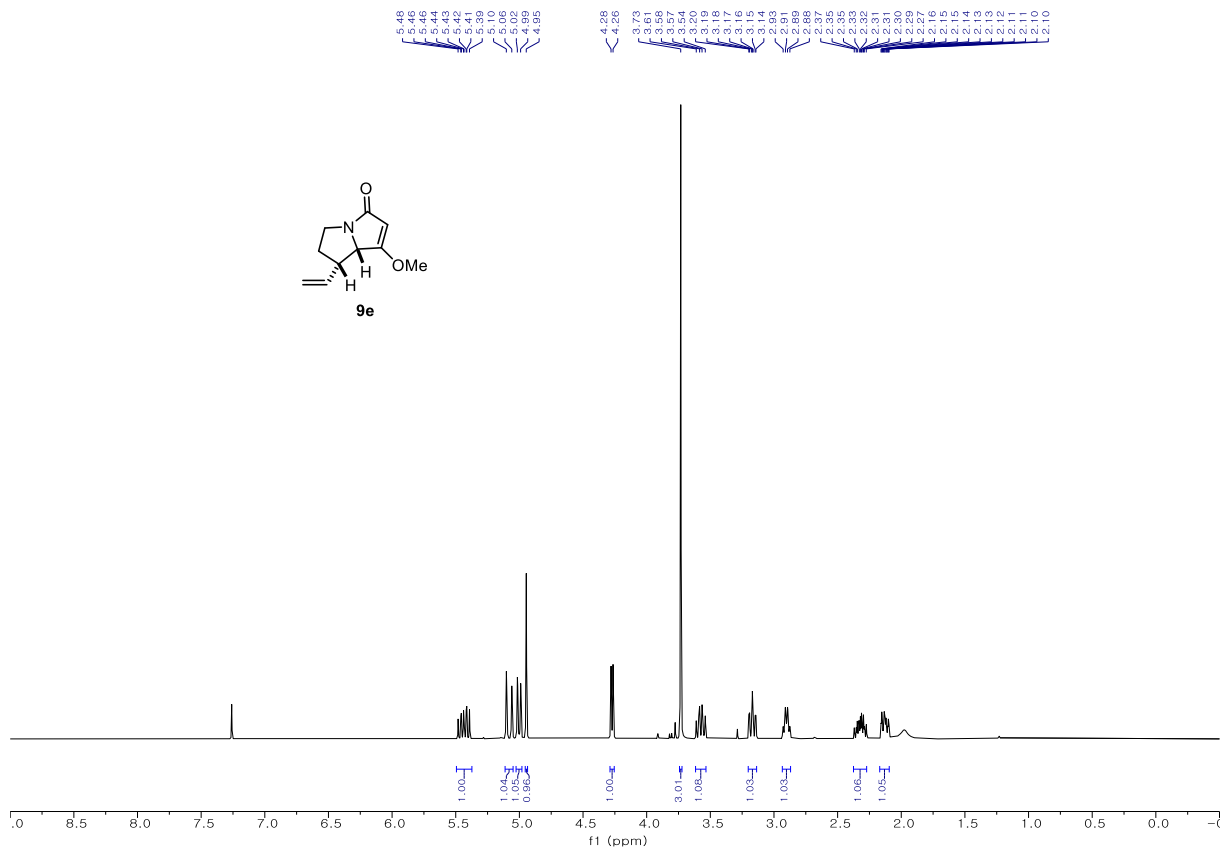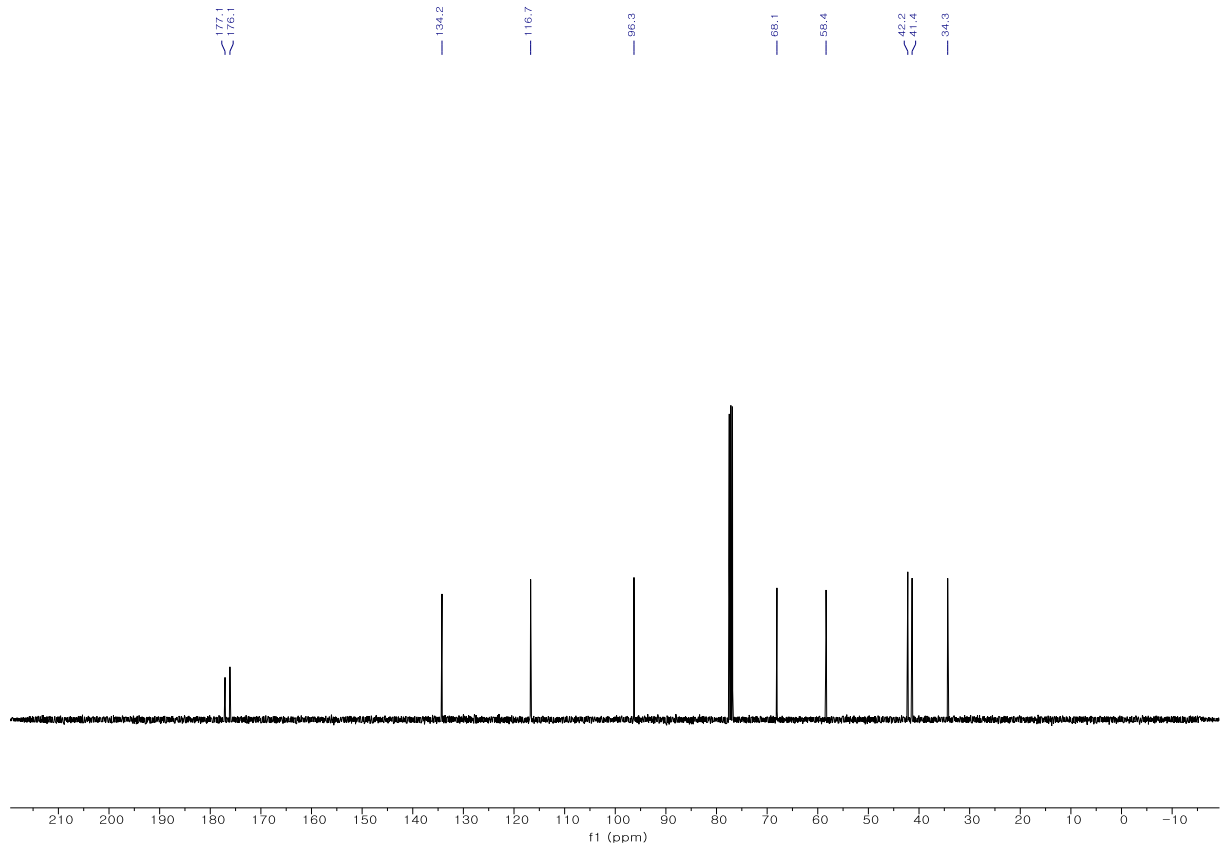

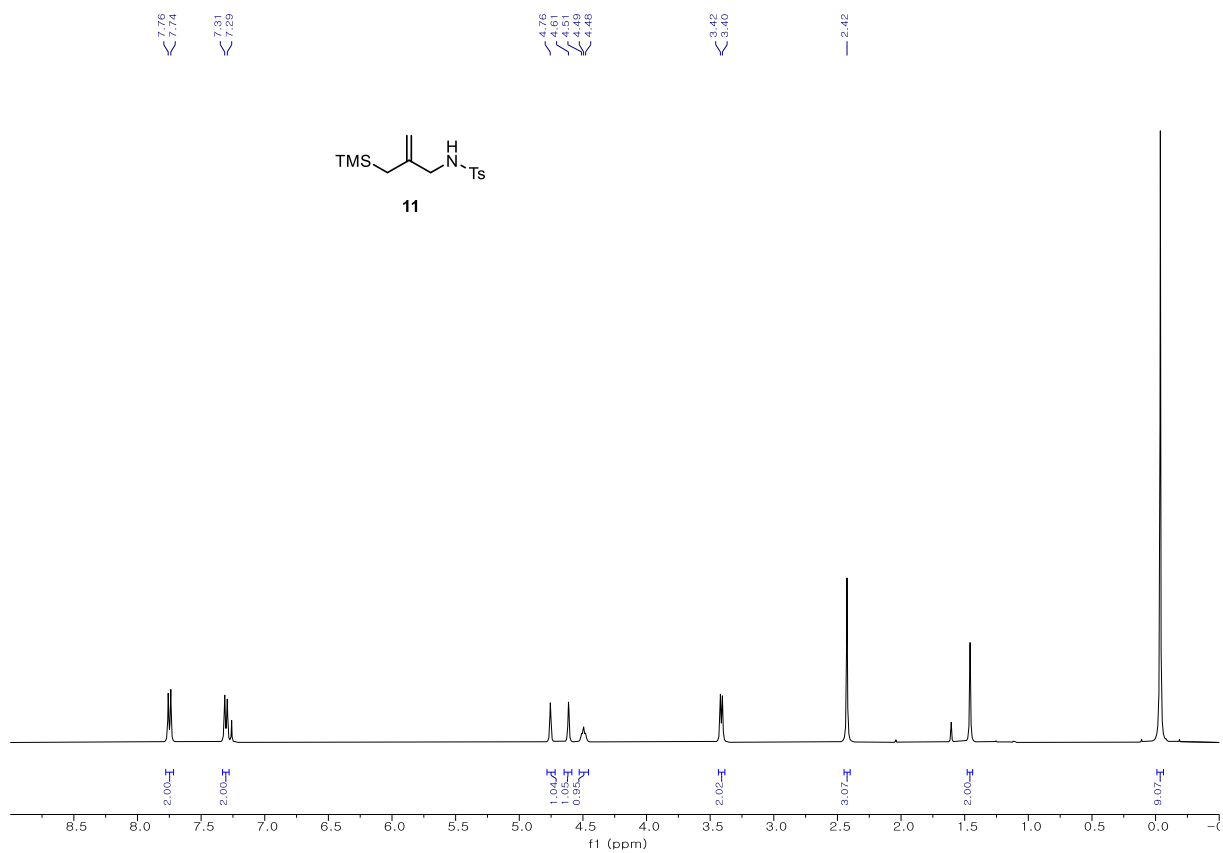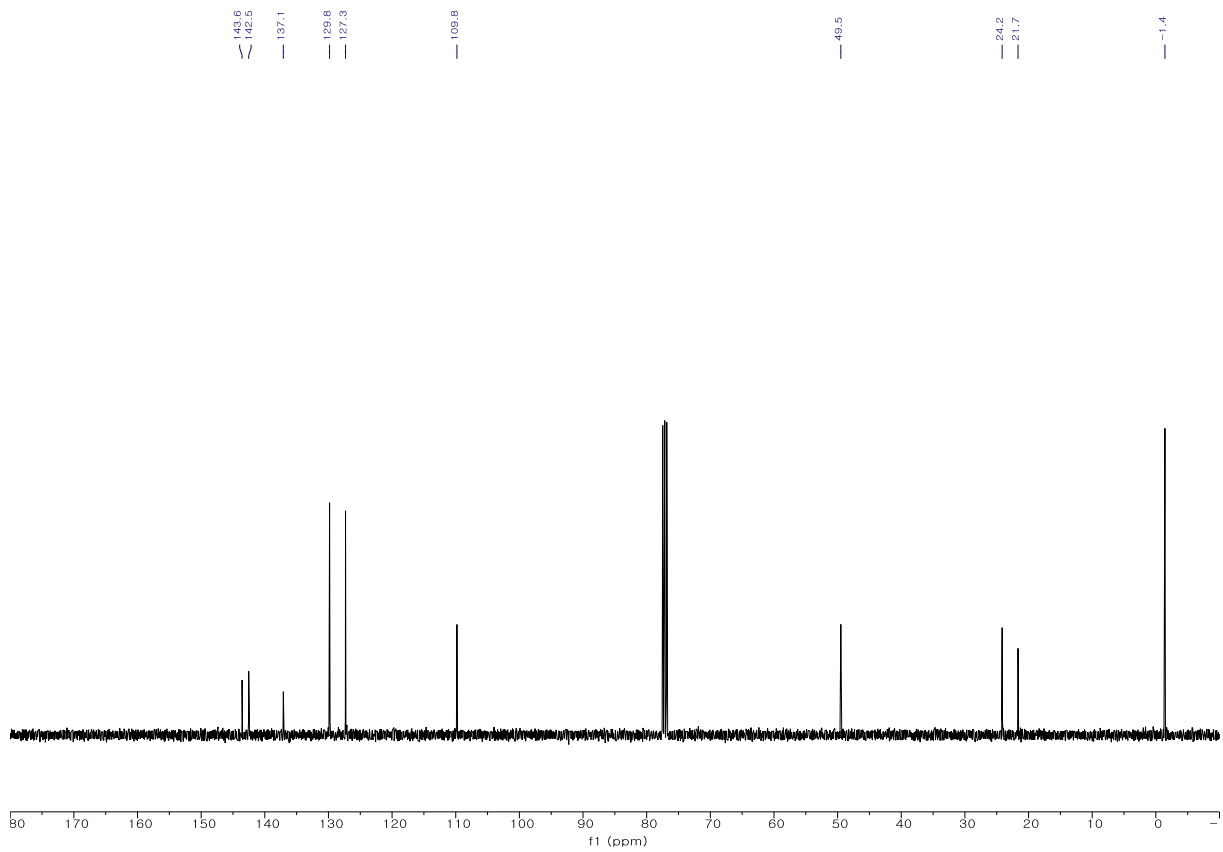

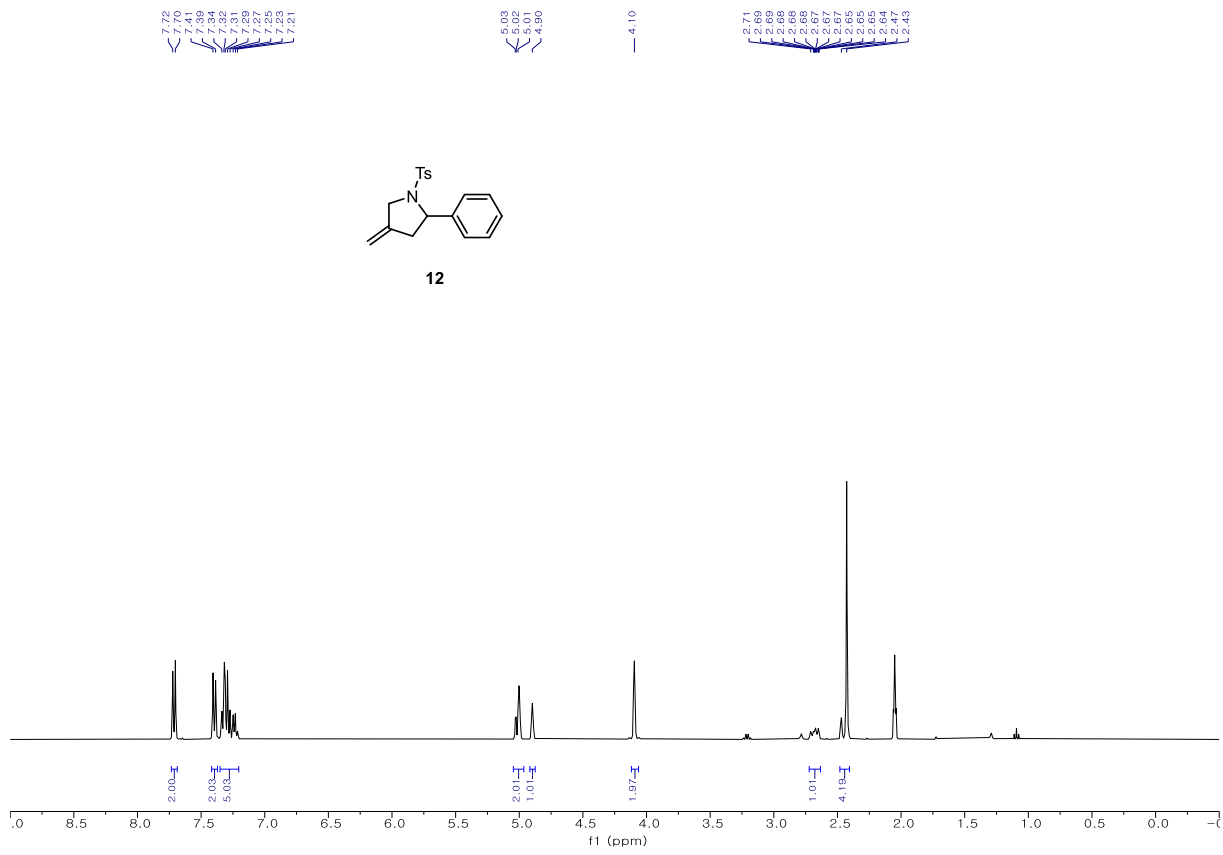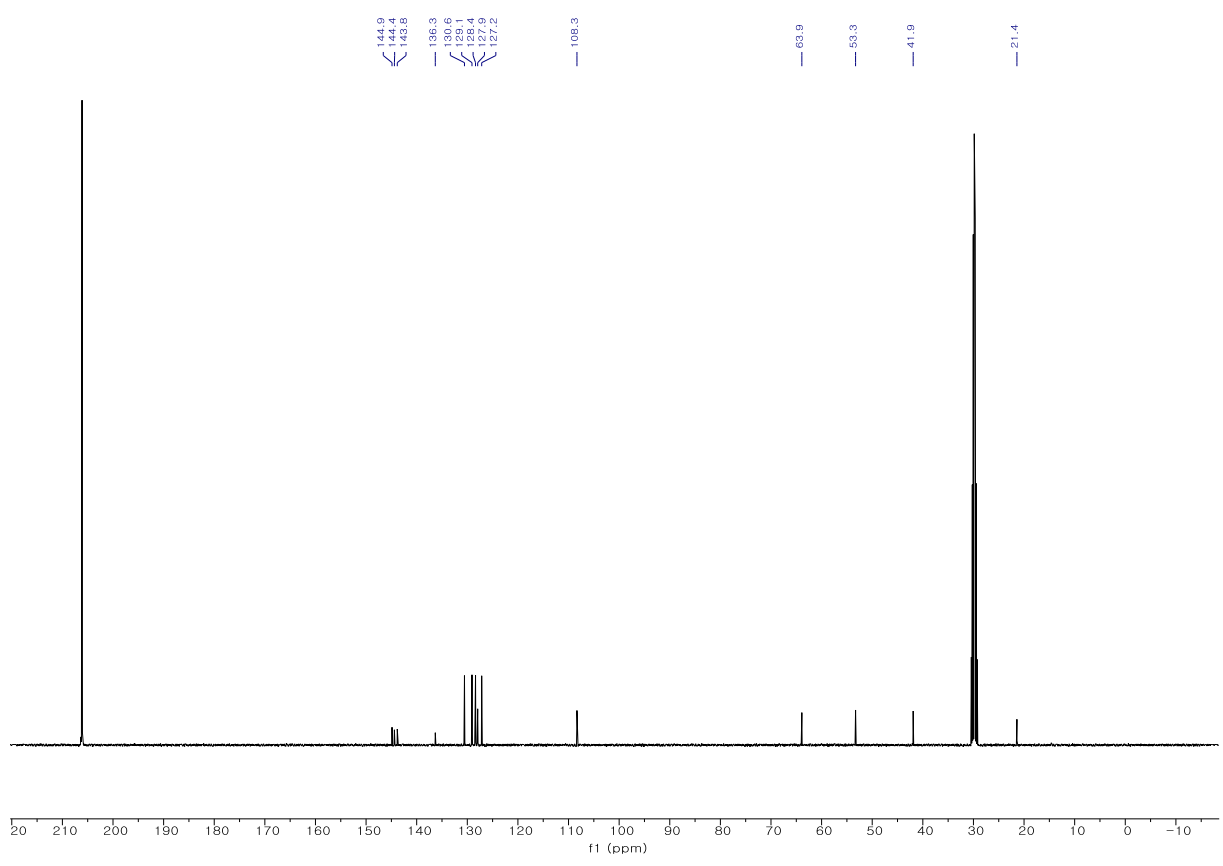



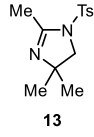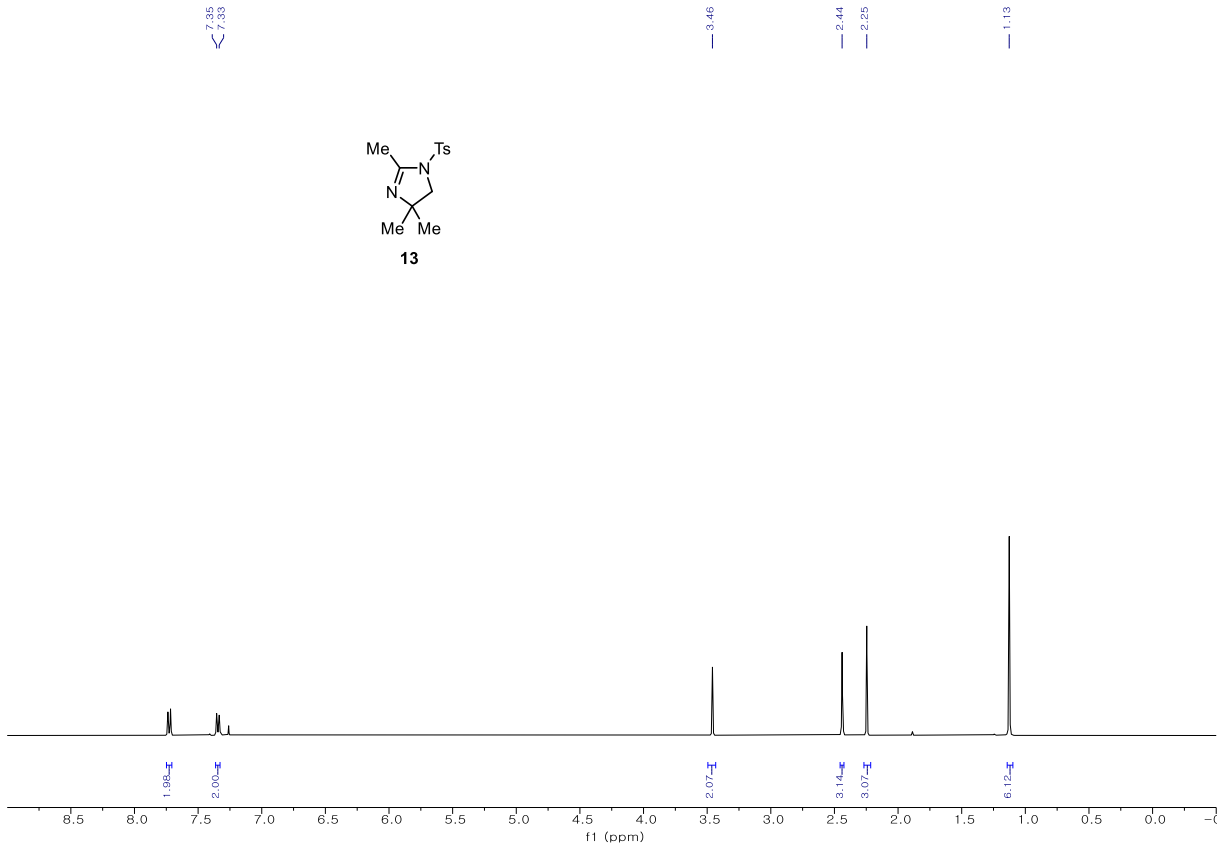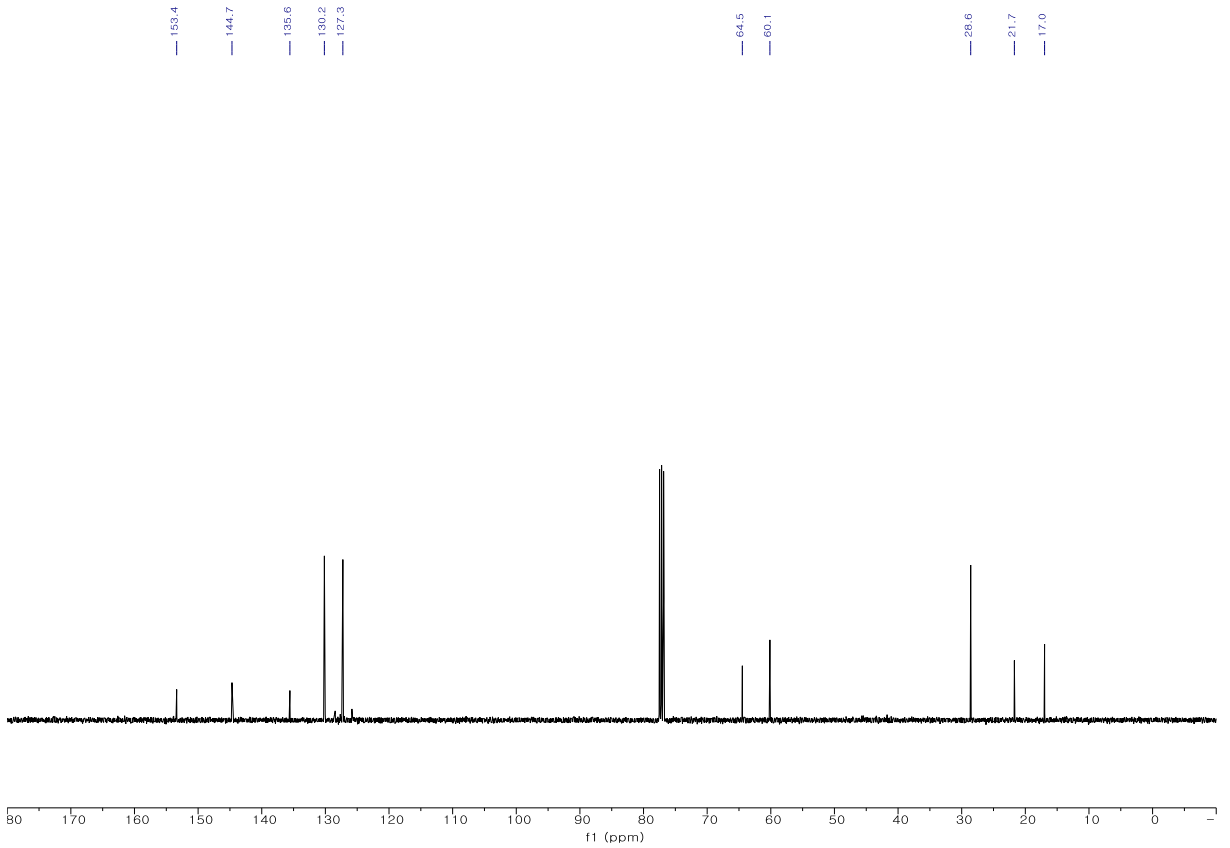

7.83  
7.81  
7.51  
7.49  
7.39  
7.38  
7.36  
7.34  
7.27  
7.26  
7.24

4.60  
4.57

3.99

2.40  
2.25

1.76  
1.73  
1.70

1.40  
1.36

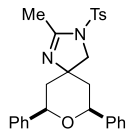

14

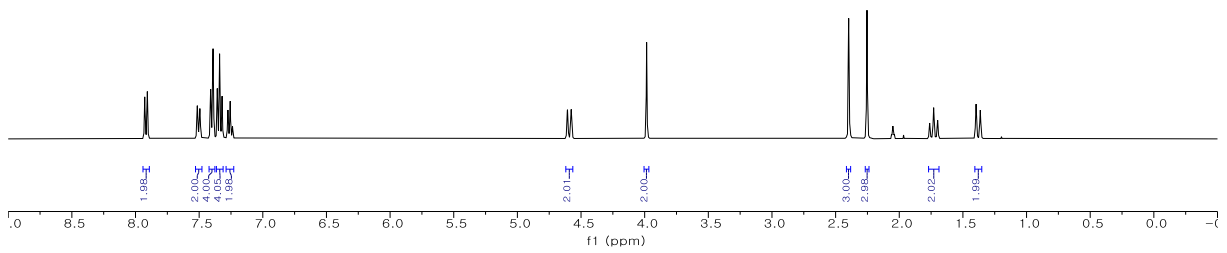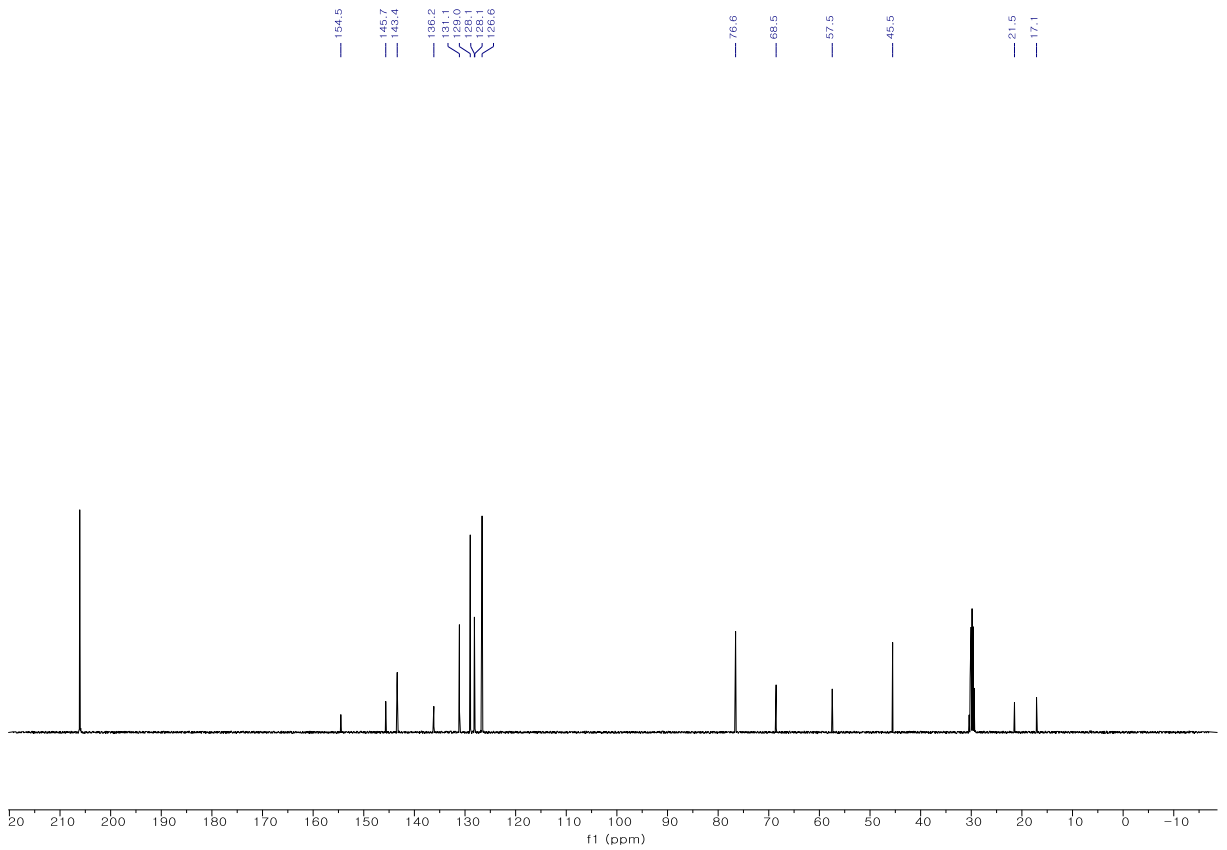

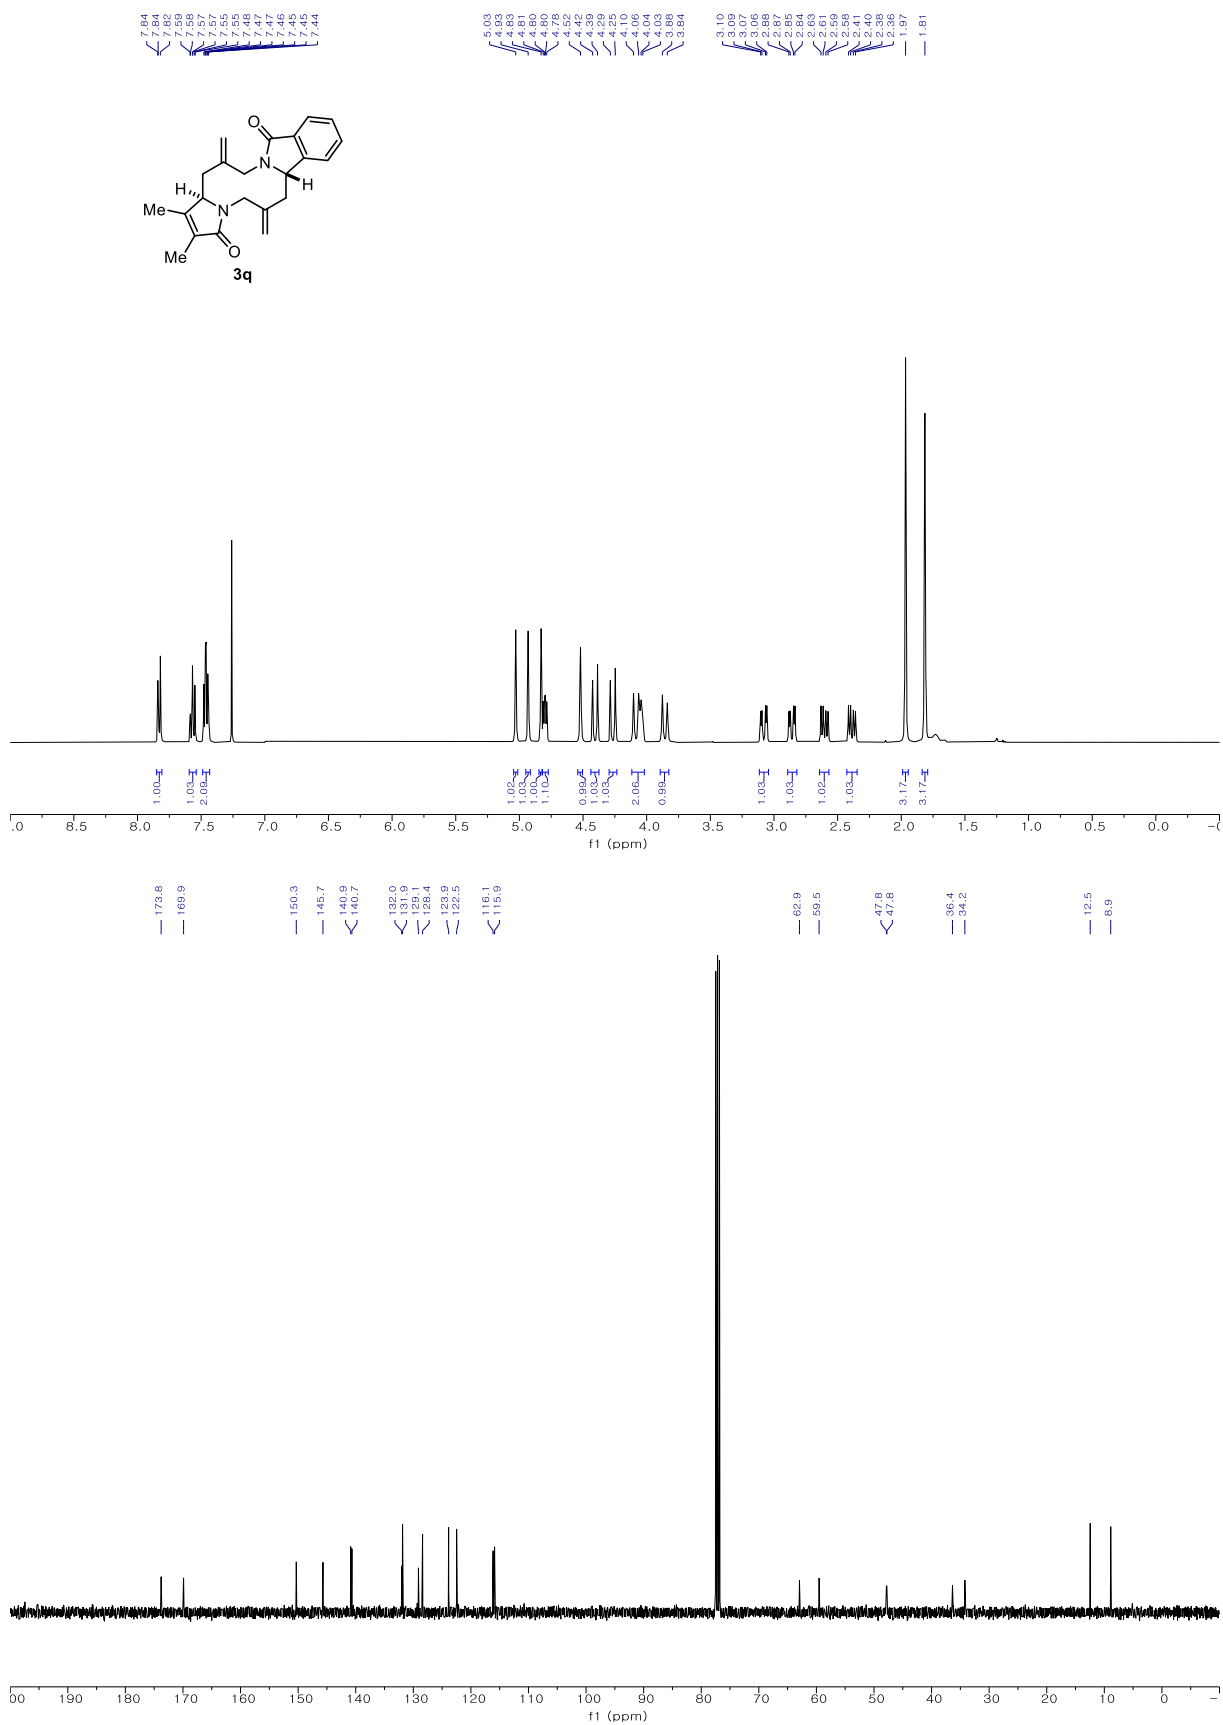

### 3. X-ray Crystallographic Data

#### 1) Crystallographic Data for 3a

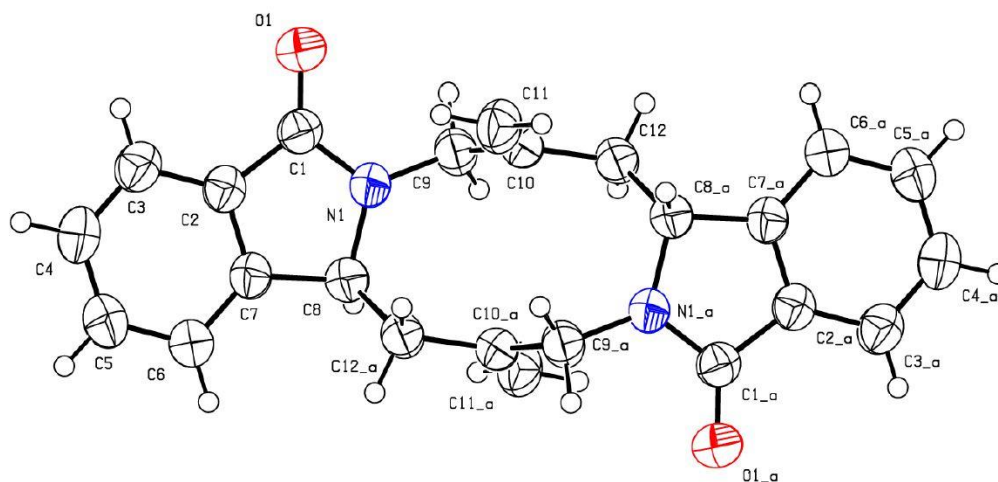

Table 1. Crystal data and structure refinement for kt3\_a.

|                                 |                                                               |                 |
|---------------------------------|---------------------------------------------------------------|-----------------|
| Identification code             | kt3_a                                                         |                 |
| Empirical formula               | C <sub>24</sub> H <sub>22</sub> N <sub>2</sub> O <sub>2</sub> |                 |
| Formula weight                  | 370.43                                                        |                 |
| Temperature                     | 293(2) K                                                      |                 |
| Wavelength                      | 0.71073 Å                                                     |                 |
| Crystal system                  | Monoclinic                                                    |                 |
| Space group                     | P2 <sub>1</sub> /n                                            |                 |
| Unit cell dimensions            | a = 7.1626(14) Å                                              | a = 90°.        |
|                                 | b = 17.647(4) Å                                               | b = 102.13(3)°. |
|                                 | c = 7.7716(16) Å                                              | c = 90°.        |
| Volume                          | 960.4(3) Å <sup>3</sup>                                       |                 |
| Z                               | 2                                                             |                 |
| Density (calculated)            | 1.281 Mg/m <sup>3</sup>                                       |                 |
| Absorption coefficient          | 0.082 mm <sup>-1</sup>                                        |                 |
| F(000)                          | 392                                                           |                 |
| Crystal size                    | ? x ? x ? mm <sup>-3</sup>                                    |                 |
| Theta range for data collection | 3.130 to 25.999°.                                             |                 |

|                                   |                                             |
|-----------------------------------|---------------------------------------------|
| Index ranges                      | -8<=h<=8, -21<=k<=21, -9<=l<=9              |
| Reflections collected             | 8181                                        |
| Independent reflections           | 1885 [R(int) = 0.0513]                      |
| Completeness to theta = 25.242°   | 99.9 %                                      |
| Absorption correction             | Semi-empirical from equivalents             |
| Max. and min. transmission        | 1.0000 and 0.5783                           |
| Refinement method                 | Full-matrix least-squares on F <sup>2</sup> |
| Data / restraints / parameters    | 1885 / 0 / 127                              |
| Goodness-of-fit on F <sup>2</sup> | 1.076                                       |
| Final R indices [I>2sigma(I)]     | R1 = 0.0474, wR2 = 0.1227                   |
| R indices (all data)              | R1 = 0.0819, wR2 = 0.1448                   |
| Extinction coefficient            | n/a                                         |
| Largest diff. peak and hole       | 0.242 and -0.174 e.Å <sup>-3</sup>          |

Table 2. Atomic coordinates ( $\times 10^4$ ) and equivalent isotropic displacement parameters ( $\text{\AA}^2 \times 10^3$ ) for kt3\_a.

U(eq) is defined as one third of the trace of the orthogonalized  $U^{ij}$  tensor.

|       | x       | y       | z        | U(eq) |
|-------|---------|---------|----------|-------|
| O(1)  | 8320(2) | 5826(1) | 6247(2)  | 63(1) |
| N(1)  | 5681(2) | 5424(1) | 7243(2)  | 48(1) |
| C(1)  | 6619(3) | 5872(1) | 6290(2)  | 47(1) |
| C(2)  | 5195(3) | 6400(1) | 5314(2)  | 47(1) |
| C(3)  | 5415(3) | 6970(1) | 4144(3)  | 58(1) |
| C(4)  | 3812(4) | 7376(1) | 3367(3)  | 69(1) |
| C(5)  | 2057(4) | 7209(1) | 3730(3)  | 73(1) |
| C(6)  | 1832(3) | 6639(1) | 4886(3)  | 63(1) |
| C(7)  | 3432(3) | 6235(1) | 5680(3)  | 48(1) |
| C(8)  | 3606(3) | 5574(1) | 6930(3)  | 48(1) |
| C(9)  | 6601(3) | 4792(1) | 8290(3)  | 52(1) |
| C(10) | 7198(3) | 4946(1) | 10231(3) | 48(1) |
| C(11) | 7829(3) | 5615(1) | 10835(3) | 63(1) |
| C(12) | 7151(3) | 4268(1) | 11418(2) | 52(1) |

Table 3. Bond lengths [ $\text{\AA}$ ] and angles [ $^\circ$ ] for kt3\_a.

|              |          |
|--------------|----------|
| O(1)-C(1)    | 1.228(2) |
| N(1)-C(1)    | 1.354(2) |
| N(1)-C(9)    | 1.455(2) |
| N(1)-C(8)    | 1.479(2) |
| C(1)-C(2)    | 1.469(3) |
| C(2)-C(7)    | 1.382(3) |
| C(2)-C(3)    | 1.386(3) |
| C(3)-C(4)    | 1.381(3) |
| C(3)-H(3)    | 0.93     |
| C(4)-C(5)    | 1.377(3) |
| C(4)-H(4)    | 0.93     |
| C(5)-C(6)    | 1.380(3) |
| C(5)-H(5)    | 0.93     |
| C(6)-C(7)    | 1.380(3) |
| C(6)-H(6)    | 0.93     |
| C(7)-C(8)    | 1.506(3) |
| C(8)-C(12)#1 | 1.521(3) |
| C(8)-H(8)    | 0.98     |
| C(9)-C(10)   | 1.504(3) |
| C(9)-H(9A)   | 0.97     |
| C(9)-H(9B)   | 0.97     |
| C(10)-C(11)  | 1.316(3) |
| C(10)-C(12)  | 1.515(3) |
| C(11)-H(11A) | 0.93     |
| C(11)-H(11B) | 0.93     |

|                |            |
|----------------|------------|
| C(12)-H(12A)   | 0.97       |
| C(12)-H(12B)   | 0.97       |
| C(1)-N(1)-C(9) | 122.37(17) |
| C(1)-N(1)-C(8) | 113.74(16) |
| C(9)-N(1)-C(8) | 123.41(16) |
| O(1)-C(1)-N(1) | 125.78(19) |
| O(1)-C(1)-C(2) | 127.81(18) |
| N(1)-C(1)-C(2) | 106.39(16) |
| C(7)-C(2)-C(3) | 121.49(19) |
| C(7)-C(2)-C(1) | 108.99(17) |
| C(3)-C(2)-C(1) | 129.49(19) |
| C(4)-C(3)-C(2) | 117.7(2)   |
| C(4)-C(3)-H(3) | 121.1      |
| C(2)-C(3)-H(3) | 121.1      |
| C(5)-C(4)-C(3) | 120.6(2)   |
| C(5)-C(4)-H(4) | 119.7      |
| C(3)-C(4)-H(4) | 119.7      |
| C(4)-C(5)-C(6) | 121.8(2)   |
| C(4)-C(5)-H(5) | 119.1      |
| C(6)-C(5)-H(5) | 119.1      |
| C(7)-C(6)-C(5) | 117.9(2)   |
| C(7)-C(6)-H(6) | 121.1      |
| C(5)-C(6)-H(6) | 121.1      |
| C(6)-C(7)-C(2) | 120.53(19) |
| C(6)-C(7)-C(8) | 129.52(19) |
| C(2)-C(7)-C(8) | 109.91(16) |
| N(1)-C(8)-C(7) | 100.86(15) |



|                     |            |
|---------------------|------------|
| N(1)-C(8)-C(12)#1   | 114.73(16) |
| C(7)-C(8)-C(12)#1   | 114.02(17) |
| N(1)-C(8)-H(8)      | 109        |
| C(7)-C(8)-H(8)      | 109        |
| C(12)#1-C(8)-H(8)   | 109        |
| N(1)-C(9)-C(10)     | 114.99(17) |
| N(1)-C(9)-H(9A)     | 108.5      |
| C(10)-C(9)-H(9A)    | 108.5      |
| N(1)-C(9)-H(9B)     | 108.5      |
| C(10)-C(9)-H(9B)    | 108.5      |
| H(9A)-C(9)-H(9B)    | 107.5      |
| C(11)-C(10)-C(9)    | 121.63(19) |
| C(11)-C(10)-C(12)   | 122.75(18) |
| C(9)-C(10)-C(12)    | 115.49(17) |
| C(10)-C(11)-H(11A)  | 120        |
| C(10)-C(11)-H(11B)  | 120        |
| H(11A)-C(11)-H(11B) | 120        |
| C(10)-C(12)-C(8)#1  | 115.30(17) |
| C(10)-C(12)-H(12A)  | 108.4      |
| C(8)#1-C(12)-H(12A) | 108.4      |
| C(10)-C(12)-H(12B)  | 108.4      |
| C(8)#1-C(12)-H(12B) | 108.4      |
| H(12A)-C(12)-H(12B) | 107.5      |

---

Symmetry transformations used to generate equivalent atoms:  
#1 -x+1, -y+1, -z+2

Table 4. Anisotropic displacement parameters ( $\text{\AA}^2 \times 10^3$ ) for kt3\_a.

The anisotropic displacement factor exponent takes the form:  $-2p^2 [ h^2 a^* U^{11} + \dots + 2 h k a^* b^* U^{12} ]$

|       | U11   | U22   | U33   | U23   | U13   | U12   |
|-------|-------|-------|-------|-------|-------|-------|
| O(1)  | 49(1) | 76(1) | 65(1) | 7(1)  | 15(1) | -1(1) |
| N(1)  | 49(1) | 52(1) | 44(1) | 7(1)  | 12(1) | 3(1)  |
| C(1)  | 48(1) | 54(1) | 40(1) | -4(1) | 8(1)  | -4(1) |
| C(2)  | 52(1) | 47(1) | 39(1) | -3(1) | 7(1)  | -5(1) |
| C(3)  | 62(1) | 56(1) | 56(1) | 3(1)  | 14(1) | -9(1) |
| C(4)  | 80(2) | 62(2) | 66(1) | 20(1) | 18(1) | 0(1)  |
| C(5)  | 71(2) | 75(2) | 73(2) | 25(1) | 15(1) | 16(1) |
| C(6)  | 55(1) | 72(2) | 62(1) | 18(1) | 13(1) | 6(1)  |
| C(7)  | 52(1) | 50(1) | 42(1) | 4(1)  | 9(1)  | 0(1)  |
| C(8)  | 47(1) | 52(1) | 45(1) | 3(1)  | 9(1)  | 1(1)  |
| C(9)  | 55(1) | 54(1) | 45(1) | 5(1)  | 11(1) | 10(1) |
| C(10) | 44(1) | 54(1) | 46(1) | 5(1)  | 10(1) | 4(1)  |
| C(11) | 69(1) | 71(2) | 46(1) | 6(1)  | 7(1)  | -8(1) |
| C(12) | 52(1) | 56(1) | 47(1) | 5(1)  | 10(1) | 8(1)  |

Table 5. Hydrogen coordinates ( $\times 10^4$ ) and isotropic displacement parameters ( $\text{\AA}^2 \times 10^3$ ) for kt3\_a.

|        | x    | y    | z     | U(eq) |
|--------|------|------|-------|-------|
| H(3)   | 6602 | 7074 | 3892  | 69    |
| H(4)   | 3918 | 7767 | 2590  | 83    |
| H(5)   | 995  | 7487 | 3182  | 88    |
| H(6)   | 641  | 6530 | 5123  | 75    |
| H(8)   | 2918 | 5140 | 6313  | 58    |
| H(9A)  | 7722 | 4646 | 7852  | 62    |
| H(9B)  | 5731 | 4364 | 8118  | 62    |
| H(11A) | 7914 | 6007 | 10056 | 75    |
| H(11B) | 8190 | 5696 | 12042 | 75    |
| H(12A) | 8436 | 4068 | 11766 | 62    |
| H(12B) | 6366 | 3878 | 10744 | 62    |

Table 6. Torsion angles [°] for kt3\_a.

---

|                        |             |
|------------------------|-------------|
| C(9)-N(1)-C(1)-O(1)    | -3.2(3)     |
| C(8)-N(1)-C(1)-O(1)    | -175.60(19) |
| C(9)-N(1)-C(1)-C(2)    | 175.53(16)  |
| C(8)-N(1)-C(1)-C(2)    | 3.2(2)      |
| O(1)-C(1)-C(2)-C(7)    | 177.1(2)    |
| N(1)-C(1)-C(2)-C(7)    | -1.6(2)     |
| O(1)-C(1)-C(2)-C(3)    | -0.8(4)     |
| N(1)-C(1)-C(2)-C(3)    | -179.5(2)   |
| C(7)-C(2)-C(3)-C(4)    | 0.8(3)      |
| C(1)-C(2)-C(3)-C(4)    | 178.44(19)  |
| C(2)-C(3)-C(4)-C(5)    | -1.0(3)     |
| C(3)-C(4)-C(5)-C(6)    | 0.6(4)      |
| C(4)-C(5)-C(6)-C(7)    | 0.0(4)      |
| C(5)-C(6)-C(7)-C(2)    | -0.2(3)     |
| C(5)-C(6)-C(7)-C(8)    | -177.6(2)   |
| C(3)-C(2)-C(7)-C(6)    | -0.2(3)     |
| C(1)-C(2)-C(7)-C(6)    | -178.29(18) |
| C(3)-C(2)-C(7)-C(8)    | 177.69(18)  |
| C(1)-C(2)-C(7)-C(8)    | -0.4(2)     |
| C(1)-N(1)-C(8)-C(7)    | -3.3(2)     |
| C(9)-N(1)-C(8)-C(7)    | -175.55(17) |
| C(1)-N(1)-C(8)-C(12)#1 | -126.28(19) |
| C(9)-N(1)-C(8)-C(12)#1 | 61.4(2)     |
| C(6)-C(7)-C(8)-N(1)    | 179.7(2)    |
| C(2)-C(7)-C(8)-N(1)    | 2.1(2)      |

|                          |             |
|--------------------------|-------------|
| C(6)-C(7)-C(8)-C(12)#1   | -56.8(3)    |
| C(2)-C(7)-C(8)-C(12)#1   | 125.57(18)  |
| C(1)-N(1)-C(9)-C(10)     | 101.1(2)    |
| C(8)-N(1)-C(9)-C(10)     | -87.3(2)    |
| N(1)-C(9)-C(10)-C(11)    | -35.4(3)    |
| N(1)-C(9)-C(10)-C(12)    | 148.67(17)  |
| C(11)-C(10)-C(12)-C(8)#1 | 44.7(3)     |
| C(9)-C(10)-C(12)-C(8)#1  | -139.39(18) |

Symmetry transformations used to generate equivalent atoms:  
#1 -x+1,-y+1,-z+2

Table 7. Hydrogen bonds for kt3\_a [ $\text{\AA}$  and  $^\circ$ ].

| D-H...A | d(D-H) | d(H...A) | d(D...A) | $\angle(\text{DHA})$ |
|---------|--------|----------|----------|----------------------|
|---------|--------|----------|----------|----------------------|

## 2) Crystallographic Data for 4

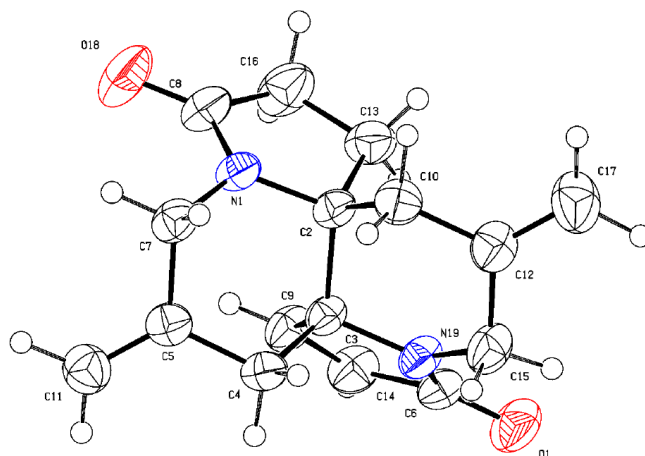

### A. Crystal Data

|                         |                                                                                                                                                            |
|-------------------------|------------------------------------------------------------------------------------------------------------------------------------------------------------|
| Empirical Formula       | $C_{16}H_{18}N_2O_2$                                                                                                                                       |
| Formula Weight          | 270.33                                                                                                                                                     |
| Crystal Color, Habit    | yellow, chunk                                                                                                                                              |
| Crystal Dimensions      | 0.300 X 0.200 X 0.200 mm                                                                                                                                   |
| Crystal System          | monoclinic                                                                                                                                                 |
| Lattice Type            | Primitive                                                                                                                                                  |
| Lattice Parameters      | $a = 10.3324(8) \text{ \AA}$<br>$b = 10.1087(6) \text{ \AA}$<br>$c = 13.894(1) \text{ \AA}$<br>$\beta = 109.438(3)^\circ$<br>$V = 1368.5(2) \text{ \AA}^3$ |
| Space Group             | $P2_1/c$ (#14)                                                                                                                                             |
| Z value                 | 4                                                                                                                                                          |
| $D_{\text{calc}}$       | $1.312 \text{ g/cm}^3$                                                                                                                                     |
| F000                    | 576.00                                                                                                                                                     |
| $\mu(\text{MoK}\alpha)$ | $0.874 \text{ cm}^{-1}$                                                                                                                                    |

## B. Intensity Measurements

|                                                        |                                                                            |
|--------------------------------------------------------|----------------------------------------------------------------------------|
| Diffractometer                                         | R-AXIS RAPID                                                               |
| Radiation                                              | MoK $\alpha$ ( $\lambda = 0.71075 \text{ \AA}$ )<br>graphite monochromated |
| Voltage, Current                                       | 50kV, 30mA                                                                 |
| Temperature                                            | 23.0°C                                                                     |
| Detector Aperture                                      | 280 x 256 mm                                                               |
| Data Images                                            | 44 exposures                                                               |
| $\omega$ oscillation Range ( $\chi=45.0, \phi=0.0$ )   | 130.0 - 190.0°                                                             |
| Exposure Rate                                          | 90.0 sec./°                                                                |
| $\omega$ oscillation Range ( $\chi=45.0, \phi=180.0$ ) | 0.0 - 160.0°                                                               |
| Exposure Rate                                          | 90.0 sec./°                                                                |
| Detector Position                                      | 127.40 mm                                                                  |
| Pixel Size                                             | 0.100 mm                                                                   |
| $2\theta$ max                                          | 54.9°                                                                      |
| No. of Reflections Measured                            | Total: 12866<br>Unique: 3115 ( $R_{\text{int}} = 0.0295$ )                 |
| Corrections                                            | Lorentz-polarization<br>Absorption<br>(trans. factors: 0.762 - 0.983)      |

### C. Structure Solution and Refinement

|                                       |                                                                                                                      |
|---------------------------------------|----------------------------------------------------------------------------------------------------------------------|
| Structure Solution                    | Direct Methods                                                                                                       |
| Refinement                            | Full-matrix least-squares on $F^2$                                                                                   |
| Function Minimized                    | $\sum w (F_o^2 - F_c^2)^2$                                                                                           |
| Least Squares Weights                 | $w = 1 / [ \sigma^2(F_o^2) + (0.0731 \cdot P)^2 + 0.0000 \cdot P ]$<br>where $P = (\text{Max}(F_o^2, 0) + 2F_c^2)/3$ |
| $2\theta_{\text{max}}$ cutoff         | 54.9°                                                                                                                |
| Anomalous Dispersion                  | All non-hydrogen atoms                                                                                               |
| No. Observations (All reflections)    | 3115                                                                                                                 |
| No. Variables                         | 205                                                                                                                  |
| Reflection/Parameter Ratio            | 15.20                                                                                                                |
| Residuals: R1 ( $I > 2.00\sigma(I)$ ) | 0.0400                                                                                                               |
| Residuals: R (All reflections)        | 0.0698                                                                                                               |
| Residuals: wR2 (All reflections)      | 0.1359                                                                                                               |
| Goodness of Fit Indicator             | 1.145                                                                                                                |
| Max Shift/Error in Final Cycle        | 0.000                                                                                                                |
| Maximum peak in Final Diff. Map       | 0.19 e <sup>-</sup> /Å <sup>3</sup>                                                                                  |
| Minimum peak in Final Diff. Map       | -0.20 e <sup>-</sup> /Å <sup>3</sup>                                                                                 |



Table 1. Atomic coordinates and  $B_{\text{iso}}/B_{\text{eq}}$ 

| atom | x          | y          | z          | Beq     |
|------|------------|------------|------------|---------|
| O1   | 0.2783(2)  | 0.0362(2)  | 0.64344(9) | 4.68(3) |
| O2   | 0.1934(2)  | -0.0909(2) | 0.09421(9) | 5.62(4) |
| N1   | 0.2201(2)  | 0.1237(1)  | 0.48149(9) | 3.04(3) |
| N2   | 0.2010(2)  | 0.0712(1)  | 0.21075(9) | 2.94(3) |
| C1   | 0.2681(2)  | 0.1012(2)  | 0.3195(1)  | 2.80(3) |
| C2   | 0.1616(2)  | 0.0803(2)  | 0.3761(1)  | 2.69(3) |
| C3   | 0.0271(2)  | 0.1548(2)  | 0.3204(1)  | 3.26(3) |
| C4   | -0.0292(2) | 0.1195(2)  | 0.2087(1)  | 3.09(3) |
| C5   | 0.0719(2)  | 0.1362(2)  | 0.1526(1)  | 3.28(3) |
| C6   | 0.2441(2)  | -0.0422(2) | 0.1792(2)  | 3.79(4) |
| C7   | 0.3608(3)  | -0.0964(2) | 0.2667(2)  | 5.03(5) |
| C8   | 0.3878(2)  | 0.0025(2)  | 0.3511(2)  | 3.87(4) |
| C9   | 0.3203(2)  | 0.2450(2)  | 0.3359(2)  | 3.50(3) |
| C10  | 0.3789(2)  | 0.2784(2)  | 0.4473(2)  | 3.65(4) |
| C11  | 0.2824(2)  | 0.2542(2)  | 0.5063(2)  | 3.80(4) |
| C12  | 0.2300(2)  | 0.0252(2)  | 0.5501(1)  | 3.26(3) |
| C13  | 0.1726(2)  | -0.0950(2) | 0.4888(2)  | 3.65(4) |
| C14  | 0.1331(2)  | -0.0631(2) | 0.3902(2)  | 3.46(4) |
| C15  | -0.1554(2) | 0.0756(2)  | 0.1633(2)  | 3.92(4) |
| C16  | 0.5040(3)  | 0.3251(2)  | 0.4916(2)  | 5.19(5) |

$$B_{\text{eq}} = \frac{8}{3} \pi^2 (U_{11}(aa^*)^2 + U_{22}(bb^*)^2 + U_{33}(cc^*)^2 + 2U_{12}(aa^*bb^*)\cos \gamma + 2U_{13}(aa^*cc^*)\cos \beta + 2U_{23}(bb^*cc^*)\cos \alpha)$$

Table 2. Atomic coordinates and  $B_{\text{iso}}$  involving hydrogen atoms

| atom | x       | y       | z      | Biso  |
|------|---------|---------|--------|-------|
| H3A  | -0.0421 | 0.1326  | 0.3507 | 1.00  |
| H3B  | 0.0434  | 0.2495  | 0.3253 | 1.00  |
| H5A  | 0.0904  | 0.2292  | 0.1456 | 1.00  |
| H5B  | 0.0375  | 0.0959  | 0.0855 | 1.00  |
| H7A  | 0.3359  | -0.1809 | 0.2885 | 1.00  |
| H7B  | 0.4419  | -0.1071 | 0.2470 | 1.00  |
| H8A  | 0.4745  | 0.0464  | 0.3599 | 1.00  |
| H8B  | 0.3928  | -0.043  | 0.4137 | 1.00  |
| H9A  | 0.3921  | 0.2579  | 0.3062 | 1.00  |
| H9B  | 0.2455  | 0.3058  | 0.3047 | 1.00  |
| H11A | 0.2093  | 0.3193  | 0.4889 | 1.00  |
| H11B | 0.3313  | 0.2570  | 0.5792 | 1.00  |
| H13  | 0.1653  | -0.1801 | 0.5154 | 1.000 |
| H14  | 0.0922  | -0.123  | 0.3359 | 1.000 |
| H15A | -0.1844 | 0.0537  | 0.0944 | 1.00  |
| H15B | -0.2151 | 0.0665  | 0.2003 | 1.00  |
| H16A | 0.5614  | 0.3392  | 0.4533 | 1.00  |
| H16B | 0.5346  | 0.3441  | 0.5610 | 1.00  |

Table 3. Anisotropic displacement parameters

| atom | U11       | U22       | U33       | U12        | U13       | U23        |
|------|-----------|-----------|-----------|------------|-----------|------------|
| O1   | 0.075(1)  | 0.0710(8) | 0.0331(7) | -0.0046(7) | 0.0204(6) | 0.0020(6)  |
| O2   | 0.096(2)  | 0.0678(8) | 0.0441(8) | 0.0202(8)  | 0.0153(8) | -0.0169(6) |
| N1   | 0.0502(8) | 0.0368(7) | 0.0320(7) | -0.0052(6) | 0.0182(6) | -0.0026(5) |
| N2   | 0.0425(8) | 0.0408(7) | 0.0314(7) | 0.0062(6)  | 0.0166(6) | 0.0006(5)  |
| C1   | 0.0403(9) | 0.0384(8) | 0.0301(8) | 0.0024(6)  | 0.0150(7) | 0.0014(6)  |
| C2   | 0.0427(9) | 0.0331(7) | 0.0292(8) | -0.0031(6) | 0.0158(7) | -0.0010(6) |
| C3   | 0.0428(9) | 0.0461(8) | 0.0401(9) | 0.0020(7)  | 0.0205(7) | -0.0008(7) |
| C4   | 0.0415(9) | 0.0361(8) | 0.0408(9) | 0.0060(7)  | 0.0149(7) | 0.0034(6)  |
| C5   | 0.048(1)  | 0.0449(8) | 0.0323(8) | 0.0072(7)  | 0.0137(7) | 0.0041(6)  |
| C6   | 0.061(2)  | 0.0488(9) | 0.039(1)  | 0.0085(8)  | 0.0221(9) | -0.0036(7) |
| C7   | 0.073(2)  | 0.066(2)  | 0.051(2)  | 0.029(1)   | 0.018(1)  | -0.0029(8) |
| C8   | 0.048(1)  | 0.058(1)  | 0.044(1)  | 0.0119(8)  | 0.0188(8) | 0.0043(7)  |
| C9   | 0.049(1)  | 0.0444(9) | 0.0428(9) | -0.0075(7) | 0.0195(8) | 0.0044(7)  |
| C10  | 0.057(1)  | 0.0360(8) | 0.046(1)  | -0.0083(7) | 0.0173(8) | -0.0006(6) |
| C11  | 0.064(2)  | 0.0394(8) | 0.0428(9) | -0.0094(8) | 0.0195(9) | -0.0094(7) |
| C12  | 0.047(1)  | 0.0492(9) | 0.0324(9) | -0.0009(7) | 0.0192(7) | 0.0025(6)  |
| C13  | 0.060(1)  | 0.0391(8) | 0.044(1)  | -0.0043(8) | 0.0240(8) | 0.0066(7)  |
| C14  | 0.059(1)  | 0.0373(8) | 0.0390(9) | -0.0072(7) | 0.0222(8) | -0.0025(7) |
| C15  | 0.047(1)  | 0.052(1)  | 0.048(1)  | 0.0004(8)  | 0.0131(9) | 0.0033(8)  |
| C16  | 0.066(2)  | 0.068(2)  | 0.058(2)  | -0.024(1)  | 0.014(1)  | -0.000(1)  |

The general temperature factor expression:  $\exp(-2\pi^2(a^2U_{11}h^2 + b^2U_{22}k^2 + c^2U_{33}l^2 + 2a*b*U_{12}hk + 2a*c*U_{13}hl + 2b*c*U_{23}kl))$

Table 4. Bond lengths (Å)

| atom | atom | distance   | atom | atom | distance   |
|------|------|------------|------|------|------------|
| O1   | C12  | 1.2294(19) | O2   | C6   | 1.224(2)   |
| N1   | C2   | 1.4542(18) | N1   | C11  | 1.458(2)   |
| N1   | C12  | 1.359(2)   | N2   | C1   | 1.4697(18) |
| N2   | C5   | 1.4650(19) | N2   | C6   | 1.355(3)   |
| C1   | C2   | 1.565(3)   | C1   | C8   | 1.535(3)   |
| C1   | C9   | 1.540(2)   | C2   | C3   | 1.543(2)   |
| C2   | C14  | 1.504(2)   | C3   | C4   | 1.507(2)   |
| C4   | C5   | 1.506(3)   | C4   | C15  | 1.322(3)   |
| C6   | C7   | 1.502(3)   | C7   | C8   | 1.495(3)   |
| C9   | C10  | 1.501(3)   | C10  | C11  | 1.506(3)   |
| C10  | C16  | 1.320(3)   | C12  | C13  | 1.489(2)   |
| C13  | C14  | 1.332(3)   |      |      |            |

Table 5. Bond lengths involving hydrogens (Å)

| atom | atom | distance   | atom | atom | distance   |
|------|------|------------|------|------|------------|
| C3   | H3A  | 0.97       | C3   | H3B  | 0.97       |
| C5   | H5A  | 0.97       | C5   | H5B  | 0.97       |
| C7   | H7A  | 0.97       | C7   | H7B  | 0.97       |
| C8   | H8A  | 0.97       | C8   | H8B  | 0.97       |
| C9   | H9A  | 0.97       | C9   | H9B  | 0.97       |
| C11  | H11A | 0.97       | C11  | H11B | 0.97       |
| C13  | H13  | 0.9500(17) | C14  | H14  | 0.9500(15) |
| C15  | H15A | 0.93       | C15  | H15B | 0.93       |
| C16  | H16A | 0.93       | C16  | H16B | 0.93       |

Table 6. Bond angles (°)

| atom | atom | atom | angle      | atom | atom | atom | angle      |
|------|------|------|------------|------|------|------|------------|
| C2   | N1   | C11  | 120.98(13) | C2   | N1   | C12  | 113.21(11) |
| C11  | N1   | C12  | 124.96(12) | C1   | N2   | C5   | 120.39(13) |
| C1   | N2   | C6   | 114.46(12) | C5   | N2   | C6   | 122.59(12) |
| N2   | C1   | C2   | 108.54(12) | N2   | C1   | C8   | 102.68(13) |
| N2   | C1   | C9   | 111.65(12) | C2   | C1   | C8   | 113.76(13) |
| C2   | C1   | C9   | 108.90(13) | C8   | C1   | C9   | 111.20(13) |
| N1   | C2   | C1   | 109.77(12) | N1   | C2   | C3   | 111.15(13) |
| N1   | C2   | C14  | 101.18(11) | C1   | C2   | C3   | 110.39(12) |
| C1   | C2   | C14  | 113.37(14) | C3   | C2   | C14  | 110.68(13) |
| C2   | C3   | C4   | 112.05(14) | C3   | C4   | C5   | 114.17(13) |
| C3   | C4   | C15  | 123.52(18) | C5   | C4   | C15  | 122.30(16) |
| N2   | C5   | C4   | 108.98(13) | O2   | C6   | N2   | 124.80(15) |
| O2   | C6   | C7   | 127.23(17) | N2   | C6   | C7   | 107.96(14) |
| C6   | C7   | C8   | 106.34(16) | C1   | C8   | C7   | 106.74(13) |
| C1   | C9   | C10  | 111.45(13) | C9   | C10  | C11  | 114.36(14) |
| C9   | C10  | C16  | 123.9(2)   | C11  | C10  | C16  | 121.78(17) |
| N1   | C11  | C10  | 109.77(14) | O1   | C12  | N1   | 125.67(14) |
| O1   | C12  | C13  | 128.46(15) | N1   | C12  | C13  | 105.86(13) |
| C12  | C13  | C14  | 108.60(14) | C2   | C14  | C13  | 111.14(13) |

Table 7. Bond angles involving hydrogens ( $^{\circ}$ )

| atom | atom | atom | angle      | atom | atom | atom | angle      |
|------|------|------|------------|------|------|------|------------|
| C2   | C3   | H3A  | 109.9      | C2   | C3   | H3B  | 109.9      |
| C4   | C3   | H3A  | 107.8      | C4   | C3   | H3B  | 107.8      |
| H3A  | C3   | H3B  | 109.4      | N2   | C5   | H5A  | 108.4      |
| N2   | C5   | H5B  | 108.4      | C4   | C5   | H5A  | 110.8      |
| C4   | C5   | H5B  | 110.8      | H5A  | C5   | H5B  | 109.4      |
| C6   | C7   | H7A  | 110.4      | C6   | C7   | H7B  | 110.4      |
| C8   | C7   | H7A  | 110.1      | C8   | C7   | H7B  | 110.1      |
| H7A  | C7   | H7B  | 109.5      | C1   | C8   | H8A  | 111.2      |
| C1   | C8   | H8B  | 111.2      | C7   | C8   | H8A  | 109.1      |
| C7   | C8   | H8B  | 109.1      | H8A  | C8   | H8B  | 109.4      |
| C1   | C9   | H9A  | 110.1      | C1   | C9   | H9B  | 110.1      |
| C10  | C9   | H9A  | 107.8      | C10  | C9   | H9B  | 107.8      |
| H9A  | C9   | H9B  | 109.4      | N1   | C11  | H11A | 108        |
| N1   | C11  | H11B | 108        | C10  | C11  | H11A | 110.8      |
| C10  | C11  | H11B | 110.8      | H11A | C11  | H11B | 109.4      |
| C12  | C13  | H13  | 125.70(16) | C14  | C13  | H13  | 125.70(16) |
| C2   | C14  | H14  | 124.43(15) | C13  | C14  | H14  | 124.43(16) |
| C4   | C15  | H15A | 120        | C4   | C15  | H15B | 120        |
| H15A | C15  | H15B | 120        | C10  | C16  | H16A | 120        |
| C10  | C16  | H16B | 120        | H16A | C16  | H16B | 120        |

Table 8. Torsion Angles( $^{\circ}$ )(Those having bond angles  $> 160$  or  $< 20$  degrees are excluded.)

| atom1 | atom2 | atom3 | atom4 | angle       | atom1 | atom2 | atom3 | atom4 | angle       |
|-------|-------|-------|-------|-------------|-------|-------|-------|-------|-------------|
| C2    | N1    | C11   | C10   | -47.56(18)  | C11   | N1    | C2    | C1    | 51.07(18)   |
| C11   | N1    | C2    | C3    | -71.34(19)  | C11   | N1    | C2    | C14   | 171.11(14)  |
| C2    | N1    | C12   | O1    | 178.51(16)  | C2    | N1    | C12   | C13   | -0.92(19)   |
| C12   | N1    | C2    | C1    | -118.81(14) | C12   | N1    | C2    | C3    | 118.78(14)  |
| C12   | N1    | C2    | C14   | 1.23(18)    | C11   | N1    | C12   | O1    | 9.1(3)      |
| C11   | N1    | C12   | C13   | -170.32(15) | C12   | N1    | C11   | C10   | 121.07(17)  |
| C1    | N2    | C5    | C4    | -52.01(16)  | C5    | N2    | C1    | C2    | 53.49(16)   |
| C5    | N2    | C1    | C8    | 174.22(12)  | C5    | N2    | C1    | C9    | -66.56(18)  |
| C1    | N2    | C6    | O2    | 173.44(16)  | C1    | N2    | C6    | C7    | -5.5(2)     |
| C6    | N2    | C1    | C2    | -108.84(15) | C6    | N2    | C1    | C8    | 11.89(18)   |
| C6    | N2    | C1    | C9    | 131.12(14)  | C5    | N2    | C6    | O2    | 11.6(3)     |
| C5    | N2    | C6    | C7    | -167.34(13) | C6    | N2    | C5    | C4    | 108.83(17)  |
| N2    | C1    | C2    | N1    | -173.49(9)  | N2    | C1    | C2    | C3    | -50.62(13)  |
| N2    | C1    | C2    | C14   | 74.19(12)   | N2    | C1    | C8    | C7    | -13.30(17)  |
| N2    | C1    | C9    | C10   | 175.53(13)  | C2    | C1    | C8    | C7    | 103.77(14)  |
| C8    | C1    | C2    | N1    | 72.89(14)   | C8    | C1    | C2    | C3    | -164.24(10) |
| C8    | C1    | C2    | C14   | -39.43(14)  | C2    | C1    | C9    | C10   | 55.69(15)   |
| C9    | C1    | C2    | N1    | -51.74(13)  | C9    | C1    | C2    | C3    | 71.13(12)   |
| C9    | C1    | C2    | C14   | -164.06(10) | C8    | C1    | C9    | C10   | -70.43(18)  |
| C9    | C1    | C8    | C7    | -132.84(14) | N1    | C2    | C3    | C4    | 175.26(12)  |
| N1    | C2    | C14   | C13   | -1.12(18)   | C1    | C2    | C3    | C4    | 53.21(15)   |
| C1    | C2    | C14   | C13   | 116.33(14)  | C3    | C2    | C14   | C13   | -119.01(14) |
| C14   | C2    | C3    | C4    | -73.13(17)  | C2    | C3    | C4    | C5    | -53.50(16)  |



|     |     |     |     |             |     |     |     |     |             |
|-----|-----|-----|-----|-------------|-----|-----|-----|-----|-------------|
| C2  | C3  | C4  | C15 | 125.44(15)  | C3  | C4  | C5  | N2  | 49.25(16)   |
| C15 | C4  | C5  | N2  | -129.69(15) | O2  | C6  | C7  | C8  | 177.42(19)  |
| N2  | C6  | C7  | C8  | -3.7(2)     | C6  | C7  | C8  | C1  | 10.8(2)     |
| C1  | C9  | C10 | C11 | -55.02(18)  | C1  | C9  | C10 | C16 | 125.00(15)  |
| C9  | C10 | C11 | N1  | 47.28(16)   | C16 | C10 | C11 | N1  | -132.74(16) |
| O1  | C12 | C13 | C14 | -179.26(18) | N1  | C12 | C13 | C14 | 0.1(2)      |
| C12 | C13 | C14 | C2  | 0.6(3)      |     |     |     |     |             |

Table 9. Intramolecular contacts less than 3.60 Å

| atom | atom | distance   | atom | atom | distance   |
|------|------|------------|------|------|------------|
| O1   | C2   | 3.5314(18) | O1   | C11  | 2.923(2)   |
| O1   | C14  | 3.482(2)   | O2   | C1   | 3.5439(19) |
| O2   | C5   | 2.861(3)   | O2   | C8   | 3.591(2)   |
| N1   | C8   | 3.142(3)   | N1   | C9   | 2.839(3)   |
| N1   | C16  | 3.534(3)   | N2   | C3   | 2.843(3)   |
| N2   | C14  | 3.116(3)   | N2   | C15  | 3.518(3)   |
| C1   | C4   | 2.949(2)   | C1   | C11  | 2.982(3)   |
| C1   | C12  | 3.442(3)   | C1   | C13  | 3.461(3)   |
| C1   | C16  | 3.592(3)   | C2   | C5   | 2.984(2)   |
| C2   | C6   | 3.361(3)   | C2   | C7   | 3.438(3)   |
| C2   | C10  | 2.924(3)   | C3   | C9   | 3.102(3)   |
| C3   | C11  | 3.179(2)   | C3   | C12  | 3.442(2)   |
| C3   | C13  | 3.430(2)   | C4   | C6   | 3.405(3)   |
| C4   | C14  | 3.124(2)   | C5   | C9   | 3.151(2)   |
| C6   | C9   | 3.556(3)   | C6   | C14  | 3.492(3)   |
| C7   | C14  | 3.359(4)   | C8   | C10  | 3.107(3)   |
| C8   | C13  | 3.522(3)   | C8   | C14  | 2.935(3)   |
| C10  | C12  | 3.524(3)   |      |      |            |

Table 10. Intramolecular contacts less than 3.60 Å involving hydrogens

| atom | atom | distance   | atom | atom | distance   |
|------|------|------------|------|------|------------|
| O1   | H11A | 3.507      | O1   | H11B | 2.531      |
| O1   | H13  | 2.8148(12) | O2   | H5A  | 3.552      |
| O2   | H5B  | 2.458      | O2   | H7A  | 2.764      |
| O2   | H7B  | 2.738      | N1   | H3A  | 2.716      |
| N1   | H3B  | 2.65       | N1   | H8B  | 2.833      |
| N1   | H9B  | 3.149      | N1   | H13  | 3.1866(12) |
| N1   | H14  | 3.2065(12) | N2   | H3B  | 3.187      |
| N2   | H7A  | 2.933      | N2   | H7B  | 2.978      |
| N2   | H8A  | 2.906      | N2   | H8B  | 3.081      |
| N2   | H9A  | 2.734      | N2   | H9B  | 2.672      |
| N2   | H14  | 3.0721(14) | C1   | H3A  | 3.39       |
| C1   | H3B  | 2.787      | C1   | H5A  | 2.816      |
| C1   | H5B  | 3.331      | C1   | H7A  | 3.002      |
| C1   | H7B  | 3.143      | C1   | H11A | 3.423      |
| C1   | H14  | 2.9608(16) | C2   | H5A  | 3.39       |
| C2   | H8A  | 3.333      | C2   | H8B  | 2.589      |
| C2   | H9A  | 3.374      | C2   | H9B  | 2.74       |
| C2   | H11A | 2.833      | C2   | H11B | 3.307      |
| C2   | H13  | 3.2599(14) | C3   | H5A  | 2.819      |
| C3   | H5B  | 3.353      | C3   | H9B  | 2.792      |
| C3   | H11A | 2.976      | C3   | H14  | 2.8793(16) |
| C3   | H15A | 3.333      | C3   | H15B | 2.658      |
| C4   | H9B  | 3.295      | C4   | H14  | 3.0384(14) |
| C5   | H3A  | 3.336      | C5   | H3B  | 2.762      |

|     |      |            |     |      |            |
|-----|------|------------|-----|------|------------|
| C5  | H9A  | 3.509      | C5  | H9B  | 2.845      |
| C5  | H15A | 2.634      | C5  | H15B | 3.322      |
| C6  | H5A  | 3.126      | C6  | H5B  | 2.52       |
| C6  | H8A  | 2.965      | C6  | H8B  | 3.106      |
| C6  | H9A  | 3.586      | C6  | H14  | 3.185(2)   |
| C7  | H14  | 3.236(3)   | C8  | H9A  | 2.66       |
| C8  | H9B  | 3.368      | C8  | H14  | 3.248(2)   |
| C9  | H3B  | 2.816      | C9  | H5A  | 2.912      |
| C9  | H8A  | 2.515      | C9  | H8B  | 3.108      |
| C9  | H11A | 2.832      | C9  | H11B | 3.346      |
| C9  | H16A | 2.658      | C9  | H16B | 3.329      |
| C10 | H3B  | 3.326      | C10 | H8A  | 2.958      |
| C10 | H8B  | 3.291      | C11 | H3A  | 3.55       |
| C11 | H3B  | 2.879      | C11 | H8B  | 3.599      |
| C11 | H9A  | 3.334      | C11 | H9B  | 2.748      |
| C11 | H16A | 3.316      | C11 | H16B | 2.622      |
| C12 | H3A  | 3.403      | C12 | H8B  | 3.003      |
| C12 | H11A | 3.081      | C12 | H11B | 2.543      |
| C12 | H14  | 3.2114(15) | C13 | H3A  | 3.326      |
| C13 | H8B  | 2.849      | C14 | H3A  | 2.613      |
| C14 | H3B  | 3.331      | C14 | H7A  | 3.126      |
| C14 | H8B  | 2.601      | C15 | H3A  | 2.54       |
| C15 | H3B  | 3.049      | C15 | H5A  | 3.056      |
| C15 | H5B  | 2.572      | C15 | H14  | 3.4985(18) |
| C16 | H8A  | 3.319      | C16 | H9A  | 2.54       |
| C16 | H9B  | 3.049      | C16 | H11A | 3.032      |
| C16 | H11B | 2.566      | H3A | H11A | 3.268      |

|      |      |             |      |      |       |
|------|------|-------------|------|------|-------|
| H3A  | H14  | 2.973       | H3A  | H15A | 3.464 |
| H3A  | H15B | 2.35        | H3B  | H5A  | 2.706 |
| H3B  | H9B  | 2.273       | H3B  | H11A | 2.451 |
| H3B  | H15B | 3.238       | H5A  | H9A  | 3.185 |
| H5A  | H9B  | 2.386       | H5A  | H15A | 3.22  |
| H5B  | H15A | 2.375       | H5B  | H15B | 3.495 |
| H7A  | H8A  | 2.714       | H7A  | H8B  | 2.153 |
| H7A  | H14  | 2.866       | H7B  | H8A  | 2.151 |
| H7B  | H8B  | 2.613       | H8A  | H9A  | 2.331 |
| H8A  | H9B  | 3.444       | H8A  | H16A | 3.237 |
| H8B  | H9A  | 3.387       | H8B  | H13  | 3.414 |
| H8B  | H14  | 3.038       | H9A  | H16A | 2.353 |
| H9A  | H16B | 3.464       | H9B  | H11A | 2.71  |
| H9B  | H16A | 3.247       | H11A | H16B | 3.181 |
| H11B | H16A | 3.488       | H11B | H16B | 2.367 |
| H13  | H14  | 2.42365(17) |      |      |       |

Table 11. Intermolecular contacts less than 3.60 Å

| atom | atom              | distance | atom | atom             | distance |
|------|-------------------|----------|------|------------------|----------|
| O1   | C7 <sup>1</sup>   | 3.568(3) | O1   | C8 <sup>1</sup>  | 3.447(3) |
| O1   | C9 <sup>2</sup>   | 3.386(2) | O1   | C15 <sup>3</sup> | 3.517(3) |
| O2   | C13 <sup>4</sup>  | 3.474(2) | O2   | C15 <sup>5</sup> | 3.471(3) |
| C4   | C14 <sup>6</sup>  | 3.515(2) | C7   | O1 <sup>1</sup>  | 3.568(3) |
| C8   | O1 <sup>1</sup>   | 3.447(3) | C9   | O1 <sup>7</sup>  | 3.386(2) |
| C13  | O2 <sup>8</sup>   | 3.474(2) | C14  | C4 <sup>9</sup>  | 3.515(2) |
| C15  | O1 <sup>3</sup>   | 3.517(3) | C15  | O2 <sup>5</sup>  | 3.471(3) |
| C16  | C16 <sup>10</sup> | 3.545(3) |      |                  |          |

## Symmetry Operators

- |                         |                          |
|-------------------------|--------------------------|
| (1) $-X+1,-Y,-Z+1$      | (2) $X,-Y+1/2,Z+1/2$     |
| (3) $-X,-Y,-Z+1$        | (4) $X,-Y+1/2-1,Z+1/2-1$ |
| (5) $-X,-Y,-Z$          | (6) $-X,Y+1/2,-Z+1/2$    |
| (7) $X,-Y+1/2,Z+1/2-1$  | (8) $X,-Y+1/2-1,Z+1/2$   |
| (9) $-X,Y+1/2-1,-Z+1/2$ | (10) $-X+1,-Y+1,-Z+1$    |

Table 12. Intermolecular contacts less than 3.60 Å involving hydrogens

| atom | atom              | distance   | atom | atom              | distance   |
|------|-------------------|------------|------|-------------------|------------|
| O1   | H3A <sup>1</sup>  | 3.001      | O1   | H5A <sup>2</sup>  | 3.072      |
| O1   | H7B <sup>3</sup>  | 2.874      | O1   | H8A <sup>3</sup>  | 2.701      |
| O1   | H9A <sup>2</sup>  | 3.01       | O1   | H9B <sup>2</sup>  | 2.862      |
| O1   | H15B <sup>1</sup> | 2.676      | O2   | H3A <sup>4</sup>  | 3.411      |
| O2   | H3B <sup>4</sup>  | 3.415      | O2   | H5B <sup>5</sup>  | 2.823      |
| O2   | H11A <sup>6</sup> | 3.141      | O2   | H13 <sup>7</sup>  | 2.5358(13) |
| O2   | H15A <sup>5</sup> | 2.618      | O2   | H16A <sup>8</sup> | 2.91       |
| N1   | H5A <sup>2</sup>  | 3.353      | N2   | H11A <sup>6</sup> | 3.304      |
| N2   | H11B <sup>6</sup> | 3.132      | C3   | H13 <sup>1</sup>  | 3.4986(19) |
| C3   | H14 <sup>9</sup>  | 3.0814(15) | C4   | H13 <sup>9</sup>  | 3.5868(14) |
| C4   | H14 <sup>9</sup>  | 2.7042(15) | C5   | H11A <sup>6</sup> | 3.09       |
| C5   | H11B <sup>6</sup> | 3.348      | C5   | H13 <sup>9</sup>  | 3.3312(14) |
| C5   | H14 <sup>9</sup>  | 3.0008(17) | C6   | H11A <sup>6</sup> | 3.401      |
| C6   | H11B <sup>6</sup> | 3.447      | C6   | H13 <sup>7</sup>  | 3.5334(16) |
| C6   | H16A <sup>8</sup> | 3.365      | C7   | H9A <sup>8</sup>  | 3.381      |
| C7   | H11B <sup>3</sup> | 3.579      | C7   | H16A <sup>8</sup> | 3.471      |
| C7   | H16B <sup>3</sup> | 3.383      | C8   | H8B <sup>3</sup>  | 3.324      |
| C9   | H7B <sup>10</sup> | 3.388      | C9   | H15B <sup>9</sup> | 3.411      |
| C10  | H8B <sup>3</sup>  | 3.454      | C10  | H15A <sup>9</sup> | 3.368      |
| C11  | H5A <sup>2</sup>  | 3.204      | C11  | H5B <sup>2</sup>  | 3.431      |
| C11  | H15A <sup>9</sup> | 3.348      | C12  | H3A <sup>1</sup>  | 3.161      |
| C12  | H5A <sup>2</sup>  | 3.359      | C12  | H8A <sup>3</sup>  | 2.977      |
| C13  | H3A <sup>1</sup>  | 2.989      | C13  | H5A <sup>4</sup>  | 3.264      |
| C13  | H8A <sup>3</sup>  | 3.586      | C13  | H16A <sup>3</sup> | 3.581      |
| C14  | H3B <sup>4</sup>  | 3.5        | C14  | H5A <sup>4</sup>  | 3.038      |
| C15  | H3B <sup>4</sup>  | 3.48       | C15  | H7A <sup>9</sup>  | 3.289      |

|     |                    |          |     |                    |            |
|-----|--------------------|----------|-----|--------------------|------------|
| C15 | H9B <sup>4</sup>   | 2.963    | C15 | H11A <sup>4</sup>  | 3.272      |
| C15 | H13 <sup>9</sup>   | 3.480(2) | C15 | H14 <sup>9</sup>   | 3.1153(18) |
| C15 | H16A <sup>11</sup> | 3.484    | C15 | H16B <sup>11</sup> | 3.148      |
| C16 | H7A <sup>3</sup>   | 3.292    | C16 | H8B <sup>3</sup>   | 3.174      |
| C16 | H15A <sup>12</sup> | 3.294    | C16 | H15B <sup>12</sup> | 3.526      |
| C16 | H16A <sup>13</sup> | 3.592    | C16 | H16B <sup>13</sup> | 3.418      |
| H3A | O1 <sup>1</sup>    | 3.001    | H3A | O2 <sup>9</sup>    | 3.411      |
| H3A | C12 <sup>1</sup>   | 3.161    | H3A | C13 <sup>1</sup>   | 2.989      |
| H3A | H7A <sup>9</sup>   | 3.55     | H3A | H13 <sup>1</sup>   | 2.623      |
| H3A | H14 <sup>9</sup>   | 3.493    | H3B | O2 <sup>9</sup>    | 3.415      |
| H3B | C14 <sup>9</sup>   | 3.5      | H3B | C15 <sup>9</sup>   | 3.48       |
| H3B | H14 <sup>9</sup>   | 2.56     | H3B | H15A <sup>9</sup>  | 3.427      |
| H5A | O1 <sup>6</sup>    | 3.072    | H5A | N1 <sup>6</sup>    | 3.353      |
| H5A | C11 <sup>6</sup>   | 3.204    | H5A | C12 <sup>6</sup>   | 3.359      |
| H5A | C13 <sup>9</sup>   | 3.264    | H5A | C14 <sup>9</sup>   | 3.038      |
| H5A | H11A <sup>6</sup>  | 2.877    | H5A | H11B <sup>6</sup>  | 2.932      |
| H5A | H13 <sup>9</sup>   | 2.983    | H5A | H14 <sup>9</sup>   | 2.487      |
| H5B | O2 <sup>5</sup>    | 2.823    | H5B | C11 <sup>6</sup>   | 3.431      |
| H5B | H5B <sup>5</sup>   | 2.963    | H5B | H11A <sup>6</sup>  | 2.698      |
| H5B | H11B <sup>6</sup>  | 3.408    | H5B | H13 <sup>9</sup>   | 3.087      |
| H5B | H14 <sup>9</sup>   | 3.47     | H7A | C15 <sup>4</sup>   | 3.289      |
| H7A | C16 <sup>3</sup>   | 3.292    | H7A | H3A <sup>4</sup>   | 3.55       |
| H7A | H9A <sup>8</sup>   | 3.532    | H7A | H11B <sup>3</sup>  | 3.404      |
| H7A | H15B <sup>4</sup>  | 2.869    | H7A | H16B <sup>3</sup>  | 2.649      |
| H7B | O1 <sup>3</sup>    | 2.874    | H7B | C9 <sup>8</sup>    | 3.388      |
| H7B | H9A <sup>8</sup>   | 2.489    | H7B | H11B <sup>3</sup>  | 3.139      |
| H7B | H16A <sup>8</sup>  | 2.825    | H7B | H16B <sup>3</sup>  | 3.532      |
| H8A | O1 <sup>3</sup>    | 2.701    | H8A | C12 <sup>3</sup>   | 2.977      |
| H8A | C13 <sup>3</sup>   | 3.586    | H8A | H8B <sup>3</sup>   | 2.984      |



|      |                   |            |      |                   |            |
|------|-------------------|------------|------|-------------------|------------|
| H8B  | C8 <sup>3</sup>   | 3.324      | H8B  | C10 <sup>3</sup>  | 3.454      |
| H8B  | C16 <sup>3</sup>  | 3.174      | H8B  | H8A <sup>3</sup>  | 2.984      |
| H8B  | H8B <sup>3</sup>  | 2.806      | H8B  | H11B <sup>3</sup> | 3.554      |
| H8B  | H16A <sup>3</sup> | 3.467      | H8B  | H16B <sup>3</sup> | 3.127      |
| H9A  | O1 <sup>6</sup>   | 3.01       | H9A  | C7 <sup>10</sup>  | 3.381      |
| H9A  | H7A <sup>10</sup> | 3.532      | H9A  | H7B <sup>10</sup> | 2.489      |
| H9A  | H11B <sup>6</sup> | 3.008      | H9B  | O1 <sup>6</sup>   | 2.862      |
| H9B  | C15 <sup>9</sup>  | 2.963      | H9B  | H11B <sup>6</sup> | 3.585      |
| H9B  | H14 <sup>9</sup>  | 3.46       | H9B  | H15A <sup>9</sup> | 3.039      |
| H9B  | H15B <sup>9</sup> | 2.652      | H11A | O2 <sup>2</sup>   | 3.141      |
| H11A | N2 <sup>2</sup>   | 3.304      | H11A | C5 <sup>2</sup>   | 3.09       |
| H11A | C6 <sup>2</sup>   | 3.401      | H11A | C15 <sup>9</sup>  | 3.272      |
| H11A | H5A <sup>2</sup>  | 2.877      | H11A | H5B <sup>2</sup>  | 2.698      |
| H11A | H15A <sup>9</sup> | 2.611      | H11B | N2 <sup>2</sup>   | 3.132      |
| H11B | C5 <sup>2</sup>   | 3.348      | H11B | C6 <sup>2</sup>   | 3.447      |
| H11B | C7 <sup>3</sup>   | 3.579      | H11B | H5A <sup>2</sup>  | 2.932      |
| H11B | H5B <sup>2</sup>  | 3.408      | H11B | H7A <sup>3</sup>  | 3.404      |
| H11B | H7B <sup>3</sup>  | 3.139      | H11B | H8B <sup>3</sup>  | 3.554      |
| H11B | H9A <sup>2</sup>  | 3.008      | H11B | H9B <sup>2</sup>  | 3.585      |
| H13  | O2 <sup>14</sup>  | 2.5358(13) | H13  | C3 <sup>1</sup>   | 3.4986(19) |
| H13  | C4 <sup>4</sup>   | 3.5868(14) | H13  | C5 <sup>4</sup>   | 3.3312(14) |
| H13  | C6 <sup>14</sup>  | 3.5334(16) | H13  | C15 <sup>4</sup>  | 3.480(2)   |
| H13  | H3A <sup>1</sup>  | 2.623      | H13  | H5A <sup>4</sup>  | 2.983      |
| H13  | H5B <sup>4</sup>  | 3.087      | H13  | H15A <sup>4</sup> | 3.132      |
| H13  | H16A <sup>3</sup> | 3.152      | H14  | C3 <sup>4</sup>   | 3.0814(15) |
| H14  | C4 <sup>4</sup>   | 2.7042(15) | H14  | C5 <sup>4</sup>   | 3.0008(17) |
| H14  | C15 <sup>4</sup>  | 3.1153(18) | H14  | H3A <sup>4</sup>  | 3.493      |
| H14  | H3B <sup>4</sup>  | 2.56       | H14  | H5A <sup>4</sup>  | 2.487      |
| H14  | H5B <sup>4</sup>  | 3.47       | H14  | H9B <sup>4</sup>  | 3.46       |

|      |                    |       |      |                    |       |
|------|--------------------|-------|------|--------------------|-------|
| H14  | H15A <sup>4</sup>  | 3.451 | H14  | H15B <sup>4</sup>  | 3.485 |
| H15A | O2 <sup>5</sup>    | 2.618 | H15A | C10 <sup>4</sup>   | 3.368 |
| H15A | C11 <sup>4</sup>   | 3.348 | H15A | C16 <sup>11</sup>  | 3.294 |
| H15A | H3B <sup>4</sup>   | 3.427 | H15A | H9B <sup>4</sup>   | 3.039 |
| H15A | H11A <sup>4</sup>  | 2.611 | H15A | H13 <sup>9</sup>   | 3.132 |
| H15A | H14 <sup>9</sup>   | 3.451 | H15A | H16A <sup>11</sup> | 2.913 |
| H15A | H16B <sup>11</sup> | 2.969 | H15B | O1 <sup>1</sup>    | 2.676 |
| H15B | C9 <sup>4</sup>    | 3.411 | H15B | C16 <sup>11</sup>  | 3.526 |
| H15B | H7A <sup>9</sup>   | 2.869 | H15B | H9B <sup>4</sup>   | 2.652 |
| H15B | H14 <sup>9</sup>   | 3.485 | H15B | H16A <sup>11</sup> | 3.57  |
| H15B | H16B <sup>11</sup> | 2.814 | H16A | O2 <sup>10</sup>   | 2.91  |
| H16A | C6 <sup>10</sup>   | 3.365 | H16A | C7 <sup>10</sup>   | 3.471 |
| H16A | C13 <sup>3</sup>   | 3.581 | H16A | C15 <sup>12</sup>  | 3.484 |
| H16A | C16 <sup>13</sup>  | 3.592 | H16A | H7B <sup>10</sup>  | 2.825 |
| H16A | H8B <sup>3</sup>   | 3.467 | H16A | H13 <sup>3</sup>   | 3.152 |
| H16A | H15A <sup>12</sup> | 2.913 | H16A | H15B <sup>12</sup> | 3.57  |
| H16A | H16B <sup>13</sup> | 3.338 | H16B | C7 <sup>3</sup>    | 3.383 |
| H16B | C15 <sup>12</sup>  | 3.148 | H16B | C16 <sup>13</sup>  | 3.418 |
| H16B | H7A <sup>3</sup>   | 2.649 | H16B | H7B <sup>3</sup>   | 3.532 |
| H16B | H8B <sup>3</sup>   | 3.127 | H16B | H15A <sup>12</sup> | 2.969 |
| H16B | H15B <sup>12</sup> | 2.814 | H16B | H16A <sup>13</sup> | 3.338 |
| H16B | H16B <sup>13</sup> | 3.538 |      |                    |       |

#### Symmetry Operators

- |      |                    |      |                     |
|------|--------------------|------|---------------------|
| (1)  | -X,-Y,-Z+1         | (2)  | X,-Y+1/2,Z+1/2      |
| (3)  | -X+1,-Y,-Z+1       | (4)  | -X,Y+1/2-1,-Z+1/2   |
| (5)  | -X,-Y,-Z           | (6)  | X,-Y+1/2,Z+1/2-1    |
| (7)  | X,-Y+1/2-1,Z+1/2-1 | (8)  | -X+1,Y+1/2-1,-Z+1/2 |
| (9)  | -X,Y+1/2,-Z+1/2    | (10) | -X+1,Y+1/2,-Z+1/2   |
| (11) | X-1,-Y+1/2,Z+1/2-1 | (12) | X+1,-Y+1/2,Z+1/2    |
| (13) | -X+1,-Y+1,-Z+1     | (14) | X,-Y+1/2-1,Z+1/2    |

### 3) Crystallographic Data for **14**

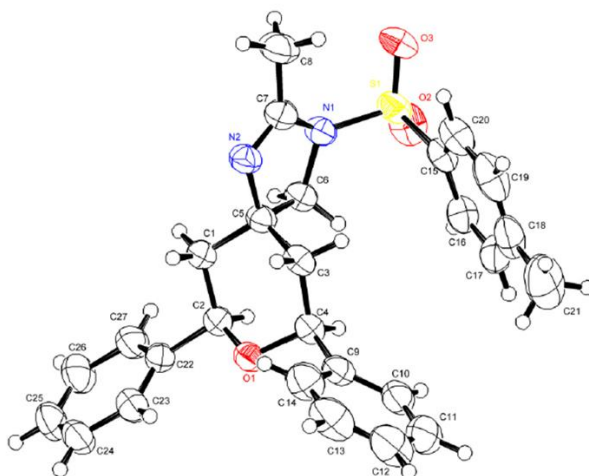

#### A. Crystal Data

|                      |                                                                                                              |
|----------------------|--------------------------------------------------------------------------------------------------------------|
| Empirical Formula    | C <sub>27</sub> H <sub>28</sub> N <sub>2</sub> O <sub>3</sub> S                                              |
| Formula Weight       | 460.59                                                                                                       |
| Crystal Color, Habit | colorless, chunk                                                                                             |
| Crystal Dimensions   | 0.300 X 0.300 X 0.300 mm                                                                                     |
| Crystal System       | monoclinic                                                                                                   |
| Lattice Type         | Primitive                                                                                                    |
| Lattice Parameters   | a = 18.6366(8) Å<br>b = 12.5881(8) Å<br>c = 10.2431(5) Å<br>β = 94.9576(12)°<br>V = 2394.0(2) Å <sup>3</sup> |
| Space Group          | P2 <sub>1</sub> /c (#14)                                                                                     |
| Z value              | 4                                                                                                            |
| D <sub>calc</sub>    | 1.278 g/cm <sup>3</sup>                                                                                      |
| F <sub>000</sub>     | 976.00                                                                                                       |
| μ(MoKα)              | 1.664 cm <sup>-1</sup>                                                                                       |

## B. Intensity Measurements

|                                       |                                                                            |
|---------------------------------------|----------------------------------------------------------------------------|
| Diffractometer                        | R-AXIS RAPID                                                               |
| Radiation                             | MoK $\alpha$ ( $\lambda = 0.71075 \text{ \AA}$ )<br>graphite monochromated |
| Voltage, Current                      | 50kV, 30mA                                                                 |
| Temperature                           | 23.0°C                                                                     |
| Detector Aperture                     | 460.0 x 256.0 mm                                                           |
| Data Images                           | 44 exposures                                                               |
| w oscillation Range (c=45.0, f=90.0)  | 130.0 - 190.0°                                                             |
| Exposure Rate                         | 90.0 sec./°                                                                |
| w oscillation Range (c=45.0, f=270.0) | 0.0 - 160.0°                                                               |
| Exposure Rate                         | 90.0 sec./°                                                                |
| Detector Position                     | 127.40 mm                                                                  |
| Pixel Size                            | 0.100 mm                                                                   |
| 2 $\theta$ <sub>max</sub>             | 54.9°                                                                      |
| No. of Reflections Measured           | Total: 23098<br>Unique: 5467 ( $R_{\text{int}} = 0.0329$ )                 |
| Corrections                           | Lorentz-polarization<br>Absorption<br>(trans. factors: 0.722 - 0.951)      |

### C. Structure Solution and Refinement

|                                       |                                                                                                                      |
|---------------------------------------|----------------------------------------------------------------------------------------------------------------------|
| Structure Solution                    | Direct Methods (SIR2008)                                                                                             |
| Refinement                            | Full-matrix least-squares on $F^2$                                                                                   |
| Function Minimized                    | $\sum w (F_o^2 - F_c^2)^2$                                                                                           |
| Least Squares Weights                 | $w = 1 / [ \sigma^2(F_o^2) + (0.0548 \cdot P)^2 + 0.3518 \cdot P ]$<br>where $P = (\text{Max}(F_o^2, 0) + 2F_c^2)/3$ |
| $2\theta_{\text{max}}$ cutoff         | 54.9°                                                                                                                |
| Anomalous Dispersion                  | All non-hydrogen atoms                                                                                               |
| No. Observations (All reflections)    | 5467                                                                                                                 |
| No. Variables                         | 300                                                                                                                  |
| Reflection/Parameter Ratio            | 18.22                                                                                                                |
| Residuals: R1 ( $I > 2.00\sigma(I)$ ) | 0.0421                                                                                                               |
| Residuals: R (All reflections)        | 0.0680                                                                                                               |
| Residuals: wR2 (All reflections)      | 0.1229                                                                                                               |
| Goodness of Fit Indicator             | 1.098                                                                                                                |
| Max Shift/Error in Final Cycle        | 0.003                                                                                                                |
| Maximum peak in Final Diff. Map       | 0.19 e <sup>-</sup> /Å <sup>3</sup>                                                                                  |
| Minimum peak in Final Diff. Map       | -0.35 e <sup>-</sup> /Å <sup>3</sup>                                                                                 |

Table 1. Atomic coordinates and  $B_{\text{iso}}/B_{\text{eq}}$ 

| atom | x           | y            | z           | Beq       |
|------|-------------|--------------|-------------|-----------|
| S1   | 0.66242(2)  | 0.16264(4)   | 0.48218(4)  | 3.979(11) |
| O1   | 0.84267(6)  | 0.07308(9)   | 1.00333(10) | 3.61(2)   |
| O2   | 0.64469(7)  | 0.26895(10)  | 0.51618(15) | 5.18(3)   |
| O3   | 0.65465(8)  | 0.13001(13)  | 0.34849(12) | 5.59(3)   |
| N1   | 0.74761(7)  | 0.14622(11)  | 0.53538(13) | 3.58(3)   |
| N2   | 0.83694(8)  | 0.02880(12)  | 0.59641(13) | 3.75(3)   |
| C1   | 0.88963(9)  | 0.11949(14)  | 0.79703(15) | 3.41(3)   |
| C2   | 0.87356(8)  | 0.15746(13)  | 0.93283(15) | 3.26(3)   |
| C3   | 0.78294(9)  | 0.00235(13)  | 0.80069(15) | 3.41(3)   |
| C4   | 0.77470(9)  | 0.03885(13)  | 0.94095(16) | 3.33(3)   |
| C5   | 0.82074(8)  | 0.08321(13)  | 0.71864(15) | 3.21(3)   |
| C6   | 0.77231(9)  | 0.17719(13)  | 0.67128(16) | 3.47(3)   |
| C7   | 0.79332(9)  | 0.06023(14)  | 0.50270(16) | 3.75(3)   |
| C8   | 0.79296(12) | 0.01914(19)  | 0.36605(18) | 5.37(5)   |
| C9   | 0.74735(9)  | -0.04933(14) | 1.02309(16) | 3.68(3)   |
| C10  | 0.68146(10) | -0.04114(16) | 1.07433(18) | 4.47(4)   |
| C11  | 0.65647(12) | -0.1235(2)   | 1.1488(2)   | 5.97(5)   |
| C12  | 0.69710(15) | -0.2129(2)   | 1.1725(3)   | 6.71(6)   |
| C13  | 0.76302(15) | -0.22229(18) | 1.1211(3)   | 6.35(5)   |
| C14  | 0.78801(12) | -0.14070(16) | 1.0473(2)   | 5.00(4)   |
| C15  | 0.61371(9)  | 0.07646(13)  | 0.57602(17) | 3.65(3)   |
| C16  | 0.59336(9)  | 0.11041(16)  | 0.69645(19) | 4.26(4)   |

|     |             |              |             |         |
|-----|-------------|--------------|-------------|---------|
| C17 | 0.56031(10) | 0.04056(19)  | 0.7749(2)   | 5.15(4) |
| C18 | 0.54622(10) | -0.0627(2)   | 0.7372(3)   | 5.56(5) |
| C19 | 0.56455(11) | -0.09424(16) | 0.6153(3)   | 5.84(5) |
| C20 | 0.59919(10) | -0.02622(15) | 0.5343(2)   | 4.71(4) |
| C21 | 0.51204(15) | -0.1401(3)   | 0.8262(3)   | 9.19(9) |
| C22 | 0.94022(9)  | 0.19682(14)  | 1.01232(16) | 3.43(3) |
| C23 | 0.97610(9)  | 0.13705(15)  | 1.11101(18) | 4.10(3) |
| C24 | 1.03779(10) | 0.17678(18)  | 1.1806(2)   | 4.76(4) |
| C25 | 1.06378(10) | 0.27461(19)  | 1.1506(2)   | 5.26(4) |
| C26 | 1.02888(11) | 0.33448(18)  | 1.0521(2)   | 5.24(4) |
| C27 | 0.96745(10) | 0.29581(16)  | 0.98410(18) | 4.30(4) |

---


$$B_{\text{eq}} = 8/3 \pi^2 (U_{11}(aa^*)^2 + U_{22}(bb^*)^2 + U_{33}(cc^*)^2 + 2U_{12}(aa^*bb^*)\cos \gamma + 2U_{13}(aa^*cc^*)\cos \beta + 2U_{23}(bb^*cc^*)\cos \alpha)$$

Table 2. Atomic coordinates and  $B_{\text{iso}}$  involving hydrogen atoms

| atom | x       | y        | z       | $B_{\text{iso}}$ |
|------|---------|----------|---------|------------------|
| H1A  | 0.91135 | 0.17681  | 0.75090 | 4.092            |
| H1B  | 0.92365 | 0.06107  | 0.80551 | 4.092            |
| H2   | 0.83873 | 0.21582  | 0.92263 | 3.910            |
| H3A  | 0.73554 | -0.01232 | 0.75773 | 4.087            |
| H3B  | 0.81007 | -0.06349 | 0.80364 | 4.087            |
| H4   | 0.74067 | 0.09831  | 0.93878 | 3.996            |
| H6A  | 0.73203 | 0.18502  | 0.72447 | 4.163            |
| H6B  | 0.79933 | 0.24311  | 0.67309 | 4.163            |
| H8A  | 0.74995 | -0.02151 | 0.34482 | 6.446            |
| H8B  | 0.83434 | -0.02525 | 0.35907 | 6.446            |
| H8C  | 0.79436 | 0.07773  | 0.30633 | 6.446            |
| H10  | 0.65367 | 0.01967  | 1.05898 | 5.360            |
| H11  | 0.61192 | -0.11763 | 1.18272 | 7.160            |
| H12  | 0.68041 | -0.26741 | 1.22309 | 8.046            |
| H13  | 0.79046 | -0.28347 | 1.13630 | 7.622            |
| H14  | 0.83254 | -0.147   | 1.01345 | 5.995            |
| H16  | 0.60206 | 0.18004  | 0.72376 | 5.117            |
| H17  | 0.54711 | 0.06366  | 0.85569 | 6.177            |
| H19  | 0.55339 | -0.16285 | 0.58659 | 7.013            |
| H20  | 0.61235 | -0.04941 | 0.45352 | 5.658            |
| H21A | 0.46329 | -0.11893 | 0.83566 | 11.033           |
| H21B | 0.53881 | -0.14059 | 0.91056 | 11.033           |



|      |         |          |         |        |
|------|---------|----------|---------|--------|
| H21C | 0.51233 | -0.21006 | 0.78879 | 11.033 |
| H23  | 0.95893 | 0.07012  | 1.13087 | 4.925  |
| H24  | 1.06135 | 0.13678  | 1.24756 | 5.717  |
| H25  | 1.10517 | 0.30077  | 1.19685 | 6.312  |
| H26  | 1.04674 | 0.40084  | 1.03157 | 6.283  |
| H27  | 0.94385 | 0.33680  | 0.91813 | 5.165  |

---

Table 3. Anisotropic displacement parameters

| atom | U11        | U22        | U33        | U12         | U13          | U23         |
|------|------------|------------|------------|-------------|--------------|-------------|
| S1   | 0.0508(3)  | 0.0517(3)  | 0.0465(3)  | 0.0027(2)   | -0.00809(19) | 0.0091(2)   |
| O1   | 0.0462(6)  | 0.0510(7)  | 0.0388(6)  | -0.0086(5)  | -0.0034(5)   | 0.0016(5)   |
| O2   | 0.0667(8)  | 0.0424(7)  | 0.0861(10) | 0.0080(6)   | -0.0029(7)   | 0.0170(7)   |
| O3   | 0.0673(9)  | 0.0994(11) | 0.0424(7)  | 0.0036(8)   | -0.0146(6)   | 0.0056(7)   |
| N1   | 0.0470(8)  | 0.0505(9)  | 0.0375(7)  | 0.0006(6)   | -0.0031(6)   | -0.0005(6)  |
| N2   | 0.0489(8)  | 0.0531(9)  | 0.0394(8)  | 0.0034(6)   | -0.0012(6)   | -0.0081(6)  |
| C1   | 0.0410(8)  | 0.0495(10) | 0.0387(9)  | 0.0003(7)   | 0.0009(7)    | -0.0032(7)  |
| C2   | 0.0403(8)  | 0.0429(9)  | 0.0402(8)  | -0.0015(7)  | 0.0015(7)    | -0.0018(7)  |
| C3   | 0.0440(9)  | 0.0401(9)  | 0.0436(9)  | -0.0009(7)  | -0.0060(7)   | -0.0024(7)  |
| C4   | 0.0411(8)  | 0.0408(9)  | 0.0437(9)  | -0.0010(7)  | -0.0022(7)   | 0.0015(7)   |
| C5   | 0.0431(8)  | 0.0435(9)  | 0.0346(8)  | 0.0013(7)   | -0.0006(7)   | -0.0050(7)  |
| C6   | 0.0470(9)  | 0.0435(9)  | 0.0404(9)  | -0.0018(7)  | -0.0016(7)   | -0.0024(7)  |
| C7   | 0.0481(9)  | 0.0525(10) | 0.0415(9)  | -0.0032(8)  | 0.0007(8)    | -0.0070(8)  |
| C8   | 0.0710(13) | 0.0872(16) | 0.0440(11) | 0.0090(11)  | -0.0058(9)   | -0.0163(10) |
| C9   | 0.0504(10) | 0.0472(10) | 0.0404(9)  | -0.0096(8)  | -0.0064(8)   | 0.0032(7)   |
| C10  | 0.0504(10) | 0.0650(12) | 0.0528(11) | -0.0106(9)  | -0.0045(9)   | 0.0071(9)   |
| C11  | 0.0614(13) | 0.0939(18) | 0.0703(14) | -0.0308(12) | -0.0009(11)  | 0.0161(13)  |
| C12  | 0.0892(18) | 0.0791(17) | 0.0817(16) | -0.0396(14) | -0.0201(13)  | 0.0318(13)  |
| C13  | 0.0936(18) | 0.0560(13) | 0.0867(16) | -0.0116(12) | -0.0214(14)  | 0.0241(12)  |
| C14  | 0.0678(13) | 0.0543(12) | 0.0660(13) | 0.0005(10)  | -0.0041(10)  | 0.0137(10)  |
| C15  | 0.0407(8)  | 0.0431(9)  | 0.0523(10) | 0.0032(7)   | -0.0099(8)   | 0.0024(8)   |
| C16  | 0.0451(9)  | 0.0523(11) | 0.0640(12) | 0.0024(8)   | 0.0009(9)    | -0.0019(9)  |

|     |            |            |            |             |             |             |
|-----|------------|------------|------------|-------------|-------------|-------------|
| C17 | 0.0439(10) | 0.0821(15) | 0.0696(13) | -0.0029(10) | 0.0047(9)   | 0.0081(11)  |
| C18 | 0.0433(10) | 0.0767(15) | 0.0884(17) | -0.0115(10) | -0.0106(11) | 0.0260(13)  |
| C19 | 0.0607(12) | 0.0441(12) | 0.112(2)   | -0.0095(9)  | -0.0254(13) | 0.0111(12)  |
| C20 | 0.0566(11) | 0.0504(11) | 0.0688(13) | 0.0031(9)   | -0.0140(9)  | -0.0063(9)  |
| C21 | 0.0786(18) | 0.125(2)   | 0.143(3)   | -0.0380(16) | -0.0090(17) | 0.063(2)    |
| C22 | 0.0406(8)  | 0.0500(10) | 0.0395(9)  | -0.0004(7)  | 0.0024(7)   | -0.0077(7)  |
| C23 | 0.0476(10) | 0.0537(11) | 0.0533(10) | 0.0024(8)   | -0.0027(8)  | -0.0035(8)  |
| C24 | 0.0486(10) | 0.0753(14) | 0.0546(11) | 0.0099(10)  | -0.0102(9)  | -0.0070(10) |
| C25 | 0.0473(10) | 0.0822(16) | 0.0681(13) | -0.0120(10) | -0.0075(10) | -0.0141(11) |
| C26 | 0.0564(11) | 0.0710(14) | 0.0698(13) | -0.0212(10) | -0.0044(10) | -0.0028(11) |
| C27 | 0.0526(10) | 0.0602(12) | 0.0496(10) | -0.0103(9)  | -0.0023(8)  | 0.0016(9)   |

---

The general temperature factor expression:  $\exp(-2\pi^2(a^2U_{11}h^2 + b^2U_{22}k^2 + c^2U_{33}l^2 + 2a*b*U_{12}hk + 2a*c*U_{13}hl + 2b*c*U_{23}kl))$

Table 4. Bond lengths (Å)

| atom | atom | distance   | atom | atom | distance   |
|------|------|------------|------|------|------------|
| S1   | O2   | 1.4287(14) | S1   | O3   | 1.4250(13) |
| S1   | N1   | 1.6464(13) | S1   | C15  | 1.7538(18) |
| O1   | C2   | 1.433(2)   | O1   | C4   | 1.4348(19) |
| N1   | C6   | 1.480(2)   | N1   | C7   | 1.435(2)   |
| N2   | C5   | 1.481(2)   | N2   | C7   | 1.266(2)   |
| C1   | C2   | 1.525(2)   | C1   | C5   | 1.524(2)   |
| C2   | C22  | 1.509(2)   | C3   | C4   | 1.529(2)   |
| C3   | C5   | 1.530(2)   | C4   | C9   | 1.508(2)   |
| C5   | C6   | 1.541(2)   | C7   | C8   | 1.492(3)   |
| C9   | C10  | 1.380(3)   | C9   | C14  | 1.388(3)   |
| C10  | C11  | 1.391(3)   | C11  | C12  | 1.366(4)   |
| C12  | C13  | 1.383(4)   | C13  | C14  | 1.380(3)   |
| C15  | C16  | 1.389(3)   | C15  | C20  | 1.381(3)   |
| C16  | C17  | 1.373(3)   | C17  | C18  | 1.375(3)   |
| C18  | C19  | 1.381(4)   | C18  | C21  | 1.513(4)   |
| C19  | C20  | 1.389(3)   | C22  | C23  | 1.385(2)   |
| C22  | C27  | 1.385(3)   | C23  | C24  | 1.392(3)   |
| C24  | C25  | 1.368(3)   | C25  | C26  | 1.377(3)   |
| C26  | C27  | 1.377(3)   |      |      |            |

Table 5. Bond lengths involving hydrogens (Å)

| atom | atom | distance | atom | atom | distance |
|------|------|----------|------|------|----------|
| C1   | H1A  | 0.97     | C1   | H1B  | 0.97     |
| C2   | H2   | 0.98     | C3   | H3A  | 0.97     |
| C3   | H3B  | 0.97     | C4   | H4   | 0.98     |
| C6   | H6A  | 0.97     | C6   | H6B  | 0.97     |
| C8   | H8A  | 0.96     | C8   | H8B  | 0.96     |
| C8   | H8C  | 0.96     | C10  | H10  | 0.93     |
| C11  | H11  | 0.93     | C12  | H12  | 0.93     |
| C13  | H13  | 0.93     | C14  | H14  | 0.93     |
| C16  | H16  | 0.93     | C17  | H17  | 0.93     |
| C19  | H19  | 0.93     | C20  | H20  | 0.93     |
| C21  | H21A | 0.96     | C21  | H21B | 0.96     |
| C21  | H21C | 0.96     | C23  | H23  | 0.93     |
| C24  | H24  | 0.93     | C25  | H25  | 0.93     |
| C26  | H26  | 0.93     | C27  | H27  | 0.93     |

Table 6. Bond angles (°)

| atom | atom | atom | angle      | atom | atom | atom | angle      |
|------|------|------|------------|------|------|------|------------|
| O2   | S1   | O3   | 119.85(9)  | O2   | S1   | N1   | 105.88(8)  |
| O2   | S1   | C15  | 107.71(8)  | O3   | S1   | N1   | 107.27(8)  |
| O3   | S1   | C15  | 109.51(9)  | N1   | S1   | C15  | 105.72(8)  |
| C2   | O1   | C4   | 112.08(11) | S1   | N1   | C6   | 119.39(11) |
| S1   | N1   | C7   | 126.33(11) | C6   | N1   | C7   | 105.99(12) |
| C5   | N2   | C7   | 109.38(14) | C2   | C1   | C5   | 110.58(13) |
| O1   | C2   | C1   | 110.28(13) | O1   | C2   | C22  | 108.62(12) |
| C1   | C2   | C22  | 112.19(13) | C4   | C3   | C5   | 113.87(13) |
| O1   | C4   | C3   | 110.63(13) | O1   | C4   | C9   | 107.49(12) |
| C3   | C4   | C9   | 111.68(14) | N2   | C5   | C1   | 111.10(13) |
| N2   | C5   | C3   | 107.09(13) | N2   | C5   | C6   | 104.22(12) |
| C1   | C5   | C3   | 108.47(13) | C1   | C5   | C6   | 112.31(13) |
| C3   | C5   | C6   | 113.50(13) | N1   | C6   | C5   | 102.71(13) |
| N1   | C7   | N2   | 114.46(15) | N1   | C7   | C8   | 121.73(15) |
| N2   | C7   | C8   | 123.60(17) | C4   | C9   | C10  | 120.79(16) |
| C4   | C9   | C14  | 120.27(16) | C10  | C9   | C14  | 118.94(18) |
| C9   | C10  | C11  | 120.27(19) | C10  | C11  | C12  | 120.3(2)   |
| C11  | C12  | C13  | 120.0(2)   | C12  | C13  | C14  | 119.8(2)   |
| C9   | C14  | C13  | 120.6(2)   | S1   | C15  | C16  | 119.37(13) |
| S1   | C15  | C20  | 120.41(15) | C16  | C15  | C20  | 120.11(17) |
| C15  | C16  | C17  | 119.59(19) | C16  | C17  | C18  | 121.7(2)   |
| C17  | C18  | C19  | 118.0(2)   | C17  | C18  | C21  | 121.3(2)   |

|     |     |     |            |     |     |     |            |
|-----|-----|-----|------------|-----|-----|-----|------------|
| C19 | C18 | C21 | 120.6(2)   | C18 | C19 | C20 | 121.8(2)   |
| C15 | C20 | C19 | 118.7(2)   | C2  | C22 | C23 | 122.58(16) |
| C2  | C22 | C27 | 118.82(15) | C23 | C22 | C27 | 118.59(16) |
| C22 | C23 | C24 | 120.25(18) | C23 | C24 | C25 | 120.07(18) |
| C24 | C25 | C26 | 120.23(18) | C25 | C26 | C27 | 119.8(2)   |
| C22 | C27 | C26 | 121.07(18) |     |     |     |            |

---

Table 7. Bond angles involving hydrogens (°)

| atom | atom | atom | angle | atom | atom | atom | angle |
|------|------|------|-------|------|------|------|-------|
| C2   | C1   | H1A  | 109.5 | C2   | C1   | H1B  | 109.5 |
| C5   | C1   | H1A  | 109.5 | C5   | C1   | H1B  | 109.5 |
| H1A  | C1   | H1B  | 108.1 | O1   | C2   | H2   | 108.6 |
| C1   | C2   | H2   | 108.6 | C22  | C2   | H2   | 108.6 |
| C4   | C3   | H3A  | 108.8 | C4   | C3   | H3B  | 108.8 |
| C5   | C3   | H3A  | 108.8 | C5   | C3   | H3B  | 108.8 |
| H3A  | C3   | H3B  | 107.7 | O1   | C4   | H4   | 109   |
| C3   | C4   | H4   | 109   | C9   | C4   | H4   | 109   |
| N1   | C6   | H6A  | 111.2 | N1   | C6   | H6B  | 111.2 |
| C5   | C6   | H6A  | 111.2 | C5   | C6   | H6B  | 111.2 |
| H6A  | C6   | H6B  | 109.1 | C7   | C8   | H8A  | 109.5 |
| C7   | C8   | H8B  | 109.5 | C7   | C8   | H8C  | 109.5 |
| H8A  | C8   | H8B  | 109.5 | H8A  | C8   | H8C  | 109.5 |
| H8B  | C8   | H8C  | 109.5 | C9   | C10  | H10  | 119.9 |
| C11  | C10  | H10  | 119.9 | C10  | C11  | H11  | 119.9 |
| C12  | C11  | H11  | 119.9 | C11  | C12  | H12  | 120   |
| C13  | C12  | H12  | 120   | C12  | C13  | H13  | 120.1 |
| C14  | C13  | H13  | 120.1 | C9   | C14  | H14  | 119.7 |
| C13  | C14  | H14  | 119.7 | C15  | C16  | H16  | 120.2 |
| C17  | C16  | H16  | 120.2 | C16  | C17  | H17  | 119.2 |
| C18  | C17  | H17  | 119.1 | C18  | C19  | H19  | 119.1 |
| C20  | C19  | H19  | 119.1 | C15  | C20  | H20  | 120.6 |
| C19  | C20  | H20  | 120.6 | C18  | C21  | H21A | 109.5 |



|      |     |      |       |      |     |      |       |
|------|-----|------|-------|------|-----|------|-------|
| C18  | C21 | H21B | 109.5 | C18  | C21 | H21C | 109.5 |
| H21A | C21 | H21B | 109.5 | H21A | C21 | H21C | 109.5 |
| H21B | C21 | H21C | 109.5 | C22  | C23 | H23  | 119.9 |
| C24  | C23 | H23  | 119.9 | C23  | C24 | H24  | 120   |
| C25  | C24 | H24  | 120   | C24  | C25 | H25  | 119.9 |
| C26  | C25 | H25  | 119.9 | C25  | C26 | H26  | 120.1 |
| C27  | C26 | H26  | 120.1 | C22  | C27 | H27  | 119.5 |
| C26  | C27 | H27  | 119.5 |      |     |      |       |

---

Table 8. Torsion Angles( $^{\circ}$ )(Those having bond angles  $> 160$  or  $< 20$  degrees are excluded.)

| atom1 | atom2 | atom3 | atom4 | angle       | atom1 | atom2 | atom3 | atom4 | angle       |
|-------|-------|-------|-------|-------------|-------|-------|-------|-------|-------------|
| O2    | S1    | N1    | C6    | 48.93(12)   | O2    | S1    | N1    | C7    | -167.29(11) |
| O2    | S1    | C15   | C16   | -26.86(14)  | O2    | S1    | C15   | C20   | 156.78(11)  |
| O3    | S1    | N1    | C6    | 178.01(10)  | O3    | S1    | N1    | C7    | -38.21(14)  |
| O3    | S1    | C15   | C16   | -158.74(11) | O3    | S1    | C15   | C20   | 24.90(15)   |
| N1    | S1    | C15   | C16   | 85.99(12)   | N1    | S1    | C15   | C20   | -90.37(12)  |
| C15   | S1    | N1    | C6    | -65.19(11)  | C15   | S1    | N1    | C7    | 78.59(12)   |
| C2    | O1    | C4    | C3    | 57.92(15)   | C2    | O1    | C4    | C9    | -179.91(11) |
| C4    | O1    | C2    | C1    | -62.96(14)  | C4    | O1    | C2    | C22   | 173.72(11)  |
| S1    | N1    | C6    | C5    | 136.31(10)  | S1    | N1    | C7    | N2    | -142.56(12) |
| S1    | N1    | C7    | C8    | 42.6(2)     | C6    | N1    | C7    | N2    | 5.06(18)    |
| C6    | N1    | C7    | C8    | -169.81(13) | C7    | N1    | C6    | C5    | -14.01(15)  |
| C5    | N2    | C7    | N1    | 7.11(19)    | C5    | N2    | C7    | C8    | -178.13(13) |
| C7    | N2    | C5    | C1    | -136.89(14) | C7    | N2    | C5    | C3    | 104.83(14)  |
| C7    | N2    | C5    | C6    | -15.72(17)  | C2    | C1    | C5    | N2    | -169.99(12) |
| C2    | C1    | C5    | C3    | -52.55(16)  | C2    | C1    | C5    | C6    | 73.72(16)   |
| C5    | C1    | C2    | O1    | 60.29(16)   | C5    | C1    | C2    | C22   | -178.49(12) |
| O1    | C2    | C22   | C23   | 19.5(2)     | O1    | C2    | C22   | C27   | -161.73(12) |
| C1    | C2    | C22   | C23   | -102.71(17) | C1    | C2    | C22   | C27   | 76.10(18)   |
| C4    | C3    | C5    | N2    | 169.34(11)  | C4    | C3    | C5    | C1    | 49.36(16)   |
| C4    | C3    | C5    | C6    | -76.21(15)  | C5    | C3    | C4    | O1    | -51.87(17)  |
| C5    | C3    | C4    | C9    | -171.56(11) | O1    | C4    | C9    | C10   | 122.03(14)  |
| O1    | C4    | C9    | C14   | -58.57(18)  | C3    | C4    | C9    | C10   | -116.45(15) |
| C3    | C4    | C9    | C14   | 62.95(18)   | N2    | C5    | C6    | N1    | 17.60(14)   |
| C1    | C5    | C6    | N1    | 137.95(12)  | C3    | C5    | C6    | N1    | -98.56(14)  |
| C4    | C9    | C10   | C11   | 179.34(13)  | C4    | C9    | C14   | C13   | -179.26(14) |
| C10   | C9    | C14   | C13   | 0.2(3)      | C14   | C9    | C10   | C11   | -0.1(3)     |
| C9    | C10   | C11   | C12   | 0.3(3)      | C10   | C11   | C12   | C13   | -0.7(3)     |

|     |     |     |     |             |     |     |     |     |             |
|-----|-----|-----|-----|-------------|-----|-----|-----|-----|-------------|
| C11 | C12 | C13 | C14 | 0.7(4)      | C12 | C13 | C14 | C9  | -0.5(3)     |
| S1  | C15 | C16 | C17 | -174.83(10) | S1  | C15 | C20 | C19 | 175.89(11)  |
| C16 | C15 | C20 | C19 | -0.4(2)     | C20 | C15 | C16 | C17 | 1.5(2)      |
| C15 | C16 | C17 | C18 | -0.4(3)     | C16 | C17 | C18 | C19 | -1.7(3)     |
| C16 | C17 | C18 | C21 | 177.93(15)  | C17 | C18 | C19 | C20 | 2.9(3)      |
| C21 | C18 | C19 | C20 | -176.79(18) | C18 | C19 | C20 | C15 | -1.8(3)     |
| C2  | C22 | C23 | C24 | 179.41(14)  | C2  | C22 | C27 | C26 | -178.77(14) |
| C23 | C22 | C27 | C26 | 0.1(3)      | C27 | C22 | C23 | C24 | 0.6(3)      |
| C22 | C23 | C24 | C25 | -0.8(3)     | C23 | C24 | C25 | C26 | 0.4(3)      |
| C24 | C25 | C26 | C27 | 0.3(3)      | C25 | C26 | C27 | C22 | -0.5(3)     |

---

Table 9. Intramolecular contacts less than 3.60 Å

| atom | atom | distance | atom | atom | distance   |
|------|------|----------|------|------|------------|
| S1   | C8   | 3.331(2) | O1   | C5   | 2.9122(18) |
| O1   | C10  | 3.464(2) | O1   | C14  | 2.926(2)   |
| O1   | C23  | 2.752(2) | O2   | C6   | 2.977(2)   |
| O2   | C16  | 2.935(2) | O3   | C7   | 3.040(2)   |
| O3   | C8   | 2.923(3) | O3   | C20  | 2.983(3)   |
| N1   | C3   | 3.285(2) | N1   | C16  | 3.465(2)   |
| N1   | C20  | 3.515(2) | C1   | C4   | 2.887(2)   |
| C1   | C7   | 3.454(2) | C1   | C23  | 3.478(2)   |
| C1   | C27  | 3.197(3) | C2   | C3   | 2.846(2)   |
| C2   | C6   | 3.151(2) | C3   | C7   | 3.160(2)   |
| C3   | C10  | 3.557(3) | C3   | C14  | 3.097(3)   |
| C4   | C6   | 3.262(2) | C6   | C15  | 3.286(2)   |
| C6   | C16  | 3.470(2) | C7   | C15  | 3.499(2)   |
| C9   | C12  | 2.776(3) | C10  | C13  | 2.759(3)   |
| C11  | C14  | 2.753(3) | C15  | C18  | 2.781(3)   |
| C16  | C19  | 2.746(3) | C17  | C20  | 2.760(3)   |
| C22  | C25  | 2.776(3) | C23  | C26  | 2.759(3)   |
| C24  | C27  | 2.749(3) |      |      |            |

Table 10. Intramolecular contacts less than 3.60 Å involving hydrogens

| atom | atom | distance | atom | atom | distance |
|------|------|----------|------|------|----------|
| S1   | H6A  | 2.714    | S1   | H6B  | 3.24     |
| S1   | H8A  | 3.227    | S1   | H8C  | 3.346    |
| S1   | H16  | 2.814    | S1   | H20  | 2.835    |
| O1   | H1A  | 3.256    | O1   | H1B  | 2.633    |
| O1   | H3A  | 3.256    | O1   | H3B  | 2.701    |
| O1   | H14  | 2.779    | O1   | H23  | 2.432    |
| O2   | H6A  | 2.778    | O2   | H6B  | 3.193    |
| O2   | H16  | 2.588    | O3   | H8A  | 2.609    |
| O3   | H8C  | 2.756    | O3   | H20  | 2.651    |
| N1   | H3A  | 3.051    | N1   | H8A  | 2.878    |
| N1   | H8B  | 3.322    | N1   | H8C  | 2.713    |
| N1   | H16  | 3.488    | N1   | H20  | 3.572    |
| N2   | H1A  | 2.742    | N2   | H1B  | 2.601    |
| N2   | H3A  | 2.666    | N2   | H3B  | 2.508    |
| N2   | H6A  | 3.139    | N2   | H6B  | 2.912    |
| N2   | H8A  | 2.991    | N2   | H8B  | 2.521    |
| N2   | H8C  | 3.071    | C1   | H3A  | 3.311    |
| C1   | H3B  | 2.743    | C1   | H4   | 3.253    |
| C1   | H6A  | 3.079    | C1   | H6B  | 2.549    |
| C1   | H27  | 3.135    | C2   | H3B  | 3.258    |
| C2   | H4   | 2.592    | C2   | H6A  | 3.265    |
| C2   | H6B  | 3.085    | C2   | H23  | 2.701    |
| C2   | H27  | 2.621    | C3   | H1A  | 3.32     |
| C3   | H1B  | 2.721    | C3   | H2   | 3.104    |

|     |     |       |     |      |       |
|-----|-----|-------|-----|------|-------|
| C3  | H6A | 2.582 | C3  | H6B  | 3.325 |
| C3  | H14 | 2.965 | C4  | H1B  | 3.221 |
| C4  | H2  | 2.542 | C4  | H6A  | 2.938 |
| C4  | H10 | 2.661 | C4  | H14  | 2.655 |
| C5  | H2  | 2.673 | C5  | H4   | 2.816 |
| C6  | H1A | 2.648 | C6  | H1B  | 3.363 |
| C6  | H2  | 2.801 | C6  | H3A  | 2.655 |
| C6  | H3B | 3.369 | C6  | H4   | 3.02  |
| C6  | H16 | 3.264 | C7  | H1A  | 3.534 |
| C7  | H3A | 3.05  | C7  | H3B  | 3.444 |
| C7  | H6A | 3.063 | C7  | H6B  | 2.885 |
| C9  | H3A | 2.748 | C9  | H3B  | 2.628 |
| C9  | H11 | 3.24  | C9  | H13  | 3.243 |
| C10 | H3A | 3.497 | C10 | H4   | 2.548 |
| C10 | H12 | 3.231 | C10 | H14  | 3.224 |
| C10 | H17 | 3.472 | C10 | H21B | 3.268 |
| C11 | H13 | 3.219 | C11 | H21B | 3.144 |
| C12 | H10 | 3.227 | C12 | H14  | 3.228 |
| C13 | H11 | 3.22  | C14 | H3A  | 3.444 |
| C14 | H3B | 2.742 | C14 | H4   | 3.301 |
| C14 | H10 | 3.226 | C14 | H12  | 3.23  |
| C15 | H3A | 3.023 | C15 | H6A  | 2.909 |
| C15 | H17 | 3.223 | C15 | H19  | 3.22  |
| C16 | H3A | 3.085 | C16 | H4   | 3.542 |
| C16 | H6A | 2.741 | C16 | H20  | 3.243 |
| C17 | H3A | 3.352 | C17 | H10  | 3.269 |
| C17 | H19 | 3.202 | C17 | H21A | 2.807 |

|     |      |       |     |      |       |
|-----|------|-------|-----|------|-------|
| C17 | H21B | 2.718 | C17 | H21C | 3.286 |
| C18 | H3A  | 3.573 | C18 | H16  | 3.235 |
| C18 | H20  | 3.257 | C19 | H3A  | 3.542 |
| C19 | H17  | 3.203 | C19 | H21A | 3.081 |
| C19 | H21B | 3.158 | C19 | H21C | 2.556 |
| C20 | H3A  | 3.274 | C20 | H8A  | 3.551 |
| C20 | H16  | 3.239 | C21 | H17  | 2.658 |
| C21 | H19  | 2.65  | C22 | H1A  | 2.697 |
| C22 | H1B  | 2.718 | C22 | H24  | 3.245 |
| C22 | H26  | 3.242 | C23 | H1B  | 3.337 |
| C23 | H2   | 3.226 | C23 | H25  | 3.231 |
| C23 | H27  | 3.222 | C24 | H26  | 3.218 |
| C25 | H23  | 3.228 | C25 | H27  | 3.218 |
| C26 | H24  | 3.219 | C27 | H1A  | 2.934 |
| C27 | H1B  | 3.534 | C27 | H2   | 2.628 |
| C27 | H23  | 3.225 | C27 | H25  | 3.221 |
| H1A | H2   | 2.362 | H1A | H6A  | 3.331 |
| H1A | H6B  | 2.324 | H1A | H27  | 2.679 |
| H1B | H2   | 2.84  | H1B | H3B  | 2.633 |
| H1B | H6B  | 3.452 | H1B | H23  | 3.343 |
| H2  | H4   | 2.368 | H2  | H6A  | 2.744 |
| H2  | H6B  | 2.62  | H2  | H23  | 3.479 |
| H2  | H27  | 2.485 | H3A | H4   | 2.315 |
| H3A | H6A  | 2.507 | H3A | H6B  | 3.561 |
| H3A | H10  | 3.581 | H3A | H14  | 3.491 |
| H3A | H16  | 3.467 | H3B | H4   | 2.837 |
| H3B | H6A  | 3.515 | H3B | H14  | 2.397 |

|     |      |       |     |      |       |
|-----|------|-------|-----|------|-------|
| H4  | H6A  | 2.444 | H4  | H6B  | 3.527 |
| H4  | H10  | 2.339 | H4  | H14  | 3.581 |
| H4  | H16  | 3.406 | H6A | H16  | 2.422 |
| H8A | H20  | 2.904 | H10 | H11  | 2.317 |
| H10 | H17  | 2.806 | H10 | H21B | 3.225 |
| H11 | H12  | 2.294 | H11 | H21B | 3.009 |
| H12 | H13  | 2.314 | H13 | H14  | 2.307 |
| H16 | H17  | 2.294 | H17 | H21A | 2.777 |
| H17 | H21B | 2.639 | H17 | H21C | 3.562 |
| H19 | H20  | 2.316 | H19 | H21A | 3.221 |
| H19 | H21B | 3.365 | H19 | H21C | 2.346 |
| H23 | H24  | 2.32  | H24 | H25  | 2.296 |
| H25 | H26  | 2.307 | H26 | H27  | 2.3   |

---



Table 11. Intermolecular contacts less than 3.60 Å

| atom | atom             | distance | atom | atom             | distance |
|------|------------------|----------|------|------------------|----------|
| O2   | C4 <sup>1</sup>  | 3.555(2) | O2   | C10 <sup>1</sup> | 3.535(2) |
| O3   | C21 <sup>2</sup> | 3.451(3) | N2   | C27 <sup>1</sup> | 3.549(2) |
| C4   | O2 <sup>3</sup>  | 3.555(2) | C8   | C10 <sup>4</sup> | 3.571(3) |
| C10  | O2 <sup>3</sup>  | 3.535(2) | C10  | C8 <sup>5</sup>  | 3.571(3) |
| C12  | C19 <sup>6</sup> | 3.477(3) | C19  | C12 <sup>7</sup> | 3.477(3) |
| C21  | O3 <sup>2</sup>  | 3.451(3) | C24  | C27 <sup>3</sup> | 3.494(3) |
| C27  | N2 <sup>3</sup>  | 3.549(2) | C27  | C24 <sup>1</sup> | 3.494(3) |

## Symmetry Operators

- |                |                  |
|----------------|------------------|
| (1) X,-Y+1,Z   | (2) -X+1,-Y,-Z+1 |
| (3) X,-Y+1,Z+1 | (4) X,Y,Z-1      |
| (5) X,Y,Z+1    | (6) X,-Y,Z+1     |
| (7) X,-Y,Z     |                  |

Table 12. Intermolecular contacts less than 3.60 Å involving hydrogens

| atom | atom              | distance | atom | atom               | distance |
|------|-------------------|----------|------|--------------------|----------|
| S1   | H4 <sup>1</sup>   | 3.39     | S1   | H6A <sup>1</sup>   | 3.595    |
| S1   | H16 <sup>1</sup>  | 3.417    | O1   | H6B <sup>2</sup>   | 3.045    |
| O1   | H8C <sup>3</sup>  | 3.306    | O2   | H4 <sup>1</sup>    | 2.62     |
| O2   | H6A <sup>1</sup>  | 3.571    | O2   | H10 <sup>1</sup>   | 2.7      |
| O2   | H16 <sup>1</sup>  | 3.099    | O2   | H17 <sup>1</sup>   | 3.152    |
| O2   | H21A <sup>4</sup> | 2.979    | O3   | H6A <sup>1</sup>   | 3.071    |
| O3   | H10 <sup>5</sup>  | 3.273    | O3   | H16 <sup>1</sup>   | 2.845    |
| O3   | H21A <sup>6</sup> | 2.773    | O3   | H21C <sup>6</sup>  | 3.453    |
| N1   | H2 <sup>1</sup>   | 2.752    | N1   | H4 <sup>1</sup>    | 3.364    |
| N2   | H13 <sup>7</sup>  | 3.243    | N2   | H24 <sup>8</sup>   | 3.157    |
| N2   | H26 <sup>9</sup>  | 3.083    | N2   | H27 <sup>1</sup>   | 3.286    |
| C1   | H24 <sup>8</sup>  | 3.394    | C2   | H6B <sup>2</sup>   | 3.182    |
| C3   | H12 <sup>7</sup>  | 3.573    | C3   | H13 <sup>7</sup>   | 3.238    |
| C3   | H24 <sup>8</sup>  | 3.461    | C5   | H24 <sup>8</sup>   | 3.534    |
| C6   | H2 <sup>1</sup>   | 3.221    | C6   | H8C <sup>2</sup>   | 3.391    |
| C7   | H2 <sup>1</sup>   | 3.075    | C7   | H27 <sup>1</sup>   | 3.274    |
| C8   | H2 <sup>1</sup>   | 3.48     | C8   | H6B <sup>1</sup>   | 3.594    |
| C8   | H25 <sup>9</sup>  | 3.433    | C8   | H26 <sup>9</sup>   | 3.421    |
| C8   | H27 <sup>1</sup>  | 3.35     | C9   | H8A <sup>3</sup>   | 3.31     |
| C9   | H8C <sup>3</sup>  | 3.362    | C10  | H8A <sup>3</sup>   | 2.959    |
| C10  | H8C <sup>3</sup>  | 3.384    | C10  | H21A <sup>10</sup> | 3.552    |
| C11  | H8A <sup>3</sup>  | 2.847    | C11  | H19 <sup>11</sup>  | 3.335    |
| C11  | H20 <sup>3</sup>  | 3.425    | C12  | H8A <sup>3</sup>   | 3.097    |
| C12  | H19 <sup>11</sup> | 3.16     | C13  | H3B <sup>11</sup>  | 3.354    |
| C13  | H8A <sup>3</sup>  | 3.434    | C13  | H25 <sup>12</sup>  | 2.967    |
| C14  | H8A <sup>3</sup>  | 3.524    | C14  | H8B <sup>3</sup>   | 3.547    |

|     |                   |       |     |                   |       |
|-----|-------------------|-------|-----|-------------------|-------|
| C14 | H25 <sup>12</sup> | 3.236 | C15 | H19 <sup>6</sup>  | 3.572 |
| C16 | H21A <sup>4</sup> | 3.574 | C16 | H21C <sup>4</sup> | 3.01  |
| C17 | H11 <sup>10</sup> | 3.417 | C17 | H21C <sup>4</sup> | 3.458 |
| C18 | H12 <sup>7</sup>  | 3.303 | C19 | H12 <sup>7</sup>  | 2.916 |
| C20 | H12 <sup>7</sup>  | 3.503 | C21 | H12 <sup>7</sup>  | 3.59  |
| C21 | H16 <sup>13</sup> | 3.118 | C22 | H1A <sup>2</sup>  | 3.003 |
| C22 | H6B <sup>2</sup>  | 3.305 | C23 | H1A <sup>2</sup>  | 3.049 |
| C23 | H1B <sup>8</sup>  | 3.188 | C23 | H27 <sup>2</sup>  | 3.27  |
| C24 | H1A <sup>2</sup>  | 3.124 | C24 | H1B <sup>8</sup>  | 3.08  |
| C24 | H3B <sup>8</sup>  | 3.165 | C24 | H14 <sup>8</sup>  | 3.28  |
| C24 | H27 <sup>2</sup>  | 3.123 | C25 | H1A <sup>2</sup>  | 3.163 |
| C25 | H3B <sup>8</sup>  | 3.552 | C25 | H8B <sup>14</sup> | 3.161 |
| C25 | H13 <sup>15</sup> | 3.414 | C25 | H14 <sup>8</sup>  | 3.114 |
| C26 | H1A <sup>2</sup>  | 3.12  | C26 | H8B <sup>14</sup> | 3.169 |
| C26 | H24 <sup>1</sup>  | 3.249 | C27 | H1A <sup>2</sup>  | 3.029 |
| C27 | H24 <sup>1</sup>  | 3.223 | H1A | C22 <sup>1</sup>  | 3.003 |
| H1A | C23 <sup>1</sup>  | 3.049 | H1A | C24 <sup>1</sup>  | 3.124 |
| H1A | C25 <sup>1</sup>  | 3.163 | H1A | C26 <sup>1</sup>  | 3.12  |
| H1A | C27 <sup>1</sup>  | 3.029 | H1A | H23 <sup>1</sup>  | 3.555 |
| H1A | H27 <sup>1</sup>  | 3.517 | H1B | C23 <sup>8</sup>  | 3.188 |
| H1B | C24 <sup>8</sup>  | 3.08  | H1B | H23 <sup>8</sup>  | 2.774 |
| H1B | H24 <sup>8</sup>  | 2.57  | H2  | N1 <sup>2</sup>   | 2.752 |
| H2  | C6 <sup>2</sup>   | 3.221 | H2  | C7 <sup>2</sup>   | 3.075 |
| H2  | C8 <sup>2</sup>   | 3.48  | H2  | H6B <sup>2</sup>  | 2.777 |
| H2  | H8C <sup>2</sup>  | 2.947 | H3A | H12 <sup>7</sup>  | 2.968 |
| H3A | H13 <sup>7</sup>  | 3.07  | H3B | C13 <sup>7</sup>  | 3.354 |
| H3B | C24 <sup>8</sup>  | 3.165 | H3B | C25 <sup>8</sup>  | 3.552 |
| H3B | H12 <sup>7</sup>  | 3.272 | H3B | H13 <sup>7</sup>  | 2.584 |
| H3B | H24 <sup>8</sup>  | 2.662 | H3B | H25 <sup>8</sup>  | 3.379 |

|     |                    |       |     |                    |       |
|-----|--------------------|-------|-----|--------------------|-------|
| H4  | S1 <sup>2</sup>    | 3.39  | H4  | O2 <sup>2</sup>    | 2.62  |
| H4  | N1 <sup>2</sup>    | 3.364 | H4  | H6B <sup>2</sup>   | 3.238 |
| H6A | S1 <sup>2</sup>    | 3.595 | H6A | O2 <sup>2</sup>    | 3.571 |
| H6A | O3 <sup>2</sup>    | 3.071 | H6A | H8C <sup>2</sup>   | 3.287 |
| H6B | O1 <sup>1</sup>    | 3.045 | H6B | C2 <sup>1</sup>    | 3.182 |
| H6B | C8 <sup>2</sup>    | 3.594 | H6B | C22 <sup>1</sup>   | 3.305 |
| H6B | H2 <sup>1</sup>    | 2.777 | H6B | H4 <sup>1</sup>    | 3.238 |
| H6B | H8C <sup>2</sup>   | 2.642 | H8A | C9 <sup>5</sup>    | 3.31  |
| H8A | C10 <sup>5</sup>   | 2.959 | H8A | C11 <sup>5</sup>   | 2.847 |
| H8A | C12 <sup>5</sup>   | 3.097 | H8A | C13 <sup>5</sup>   | 3.434 |
| H8A | C14 <sup>5</sup>   | 3.524 | H8A | H10 <sup>5</sup>   | 3.34  |
| H8A | H11 <sup>5</sup>   | 3.178 | H8A | H12 <sup>5</sup>   | 3.541 |
| H8A | H25 <sup>9</sup>   | 3.56  | H8B | C14 <sup>5</sup>   | 3.547 |
| H8B | C25 <sup>9</sup>   | 3.161 | H8B | C26 <sup>9</sup>   | 3.169 |
| H8B | H25 <sup>9</sup>   | 2.551 | H8B | H26 <sup>9</sup>   | 2.57  |
| H8B | H27 <sup>1</sup>   | 3.154 | H8C | O1 <sup>5</sup>    | 3.306 |
| H8C | C6 <sup>1</sup>    | 3.391 | H8C | C9 <sup>5</sup>    | 3.362 |
| H8C | C10 <sup>5</sup>   | 3.384 | H8C | H2 <sup>1</sup>    | 2.947 |
| H8C | H6A <sup>1</sup>   | 3.287 | H8C | H6B <sup>1</sup>   | 2.642 |
| H8C | H10 <sup>5</sup>   | 3.561 | H8C | H27 <sup>1</sup>   | 3.111 |
| H10 | O2 <sup>2</sup>    | 2.7   | H10 | O3 <sup>3</sup>    | 3.273 |
| H10 | H8A <sup>3</sup>   | 3.34  | H10 | H8C <sup>3</sup>   | 3.561 |
| H10 | H21A <sup>10</sup> | 2.808 | H11 | C17 <sup>10</sup>  | 3.417 |
| H11 | H8A <sup>3</sup>   | 3.178 | H11 | H17 <sup>10</sup>  | 3.033 |
| H11 | H19 <sup>11</sup>  | 3.1   | H11 | H20 <sup>3</sup>   | 2.903 |
| H11 | H21A <sup>10</sup> | 3.29  | H11 | H21C <sup>11</sup> | 3.111 |
| H12 | C3 <sup>11</sup>   | 3.573 | H12 | C18 <sup>11</sup>  | 3.303 |
| H12 | C19 <sup>11</sup>  | 2.916 | H12 | C20 <sup>11</sup>  | 3.503 |
| H12 | C21 <sup>11</sup>  | 3.59  | H12 | H3A <sup>11</sup>  | 2.968 |

|      |                    |       |      |                    |       |
|------|--------------------|-------|------|--------------------|-------|
| H12  | H3B <sup>11</sup>  | 3.272 | H12  | H8A <sup>3</sup>   | 3.541 |
| H12  | H19 <sup>11</sup>  | 2.785 | H12  | H21B <sup>11</sup> | 3.587 |
| H12  | H21C <sup>11</sup> | 3.273 | H13  | N2 <sup>11</sup>   | 3.243 |
| H13  | C3 <sup>11</sup>   | 3.238 | H13  | C25 <sup>12</sup>  | 3.414 |
| H13  | H3A <sup>11</sup>  | 3.07  | H13  | H3B <sup>11</sup>  | 2.584 |
| H13  | H24 <sup>12</sup>  | 3.079 | H13  | H25 <sup>12</sup>  | 2.693 |
| H14  | C24 <sup>8</sup>   | 3.28  | H14  | C25 <sup>8</sup>   | 3.114 |
| H14  | H24 <sup>8</sup>   | 3.462 | H14  | H25 <sup>12</sup>  | 3.161 |
| H14  | H25 <sup>8</sup>   | 3.189 | H16  | S1 <sup>2</sup>    | 3.417 |
| H16  | O2 <sup>2</sup>    | 3.099 | H16  | O3 <sup>2</sup>    | 2.845 |
| H16  | C21 <sup>4</sup>   | 3.118 | H16  | H21A <sup>4</sup>  | 2.851 |
| H16  | H21C <sup>4</sup>  | 2.535 | H17  | O2 <sup>2</sup>    | 3.152 |
| H17  | H11 <sup>10</sup>  | 3.033 | H17  | H21A <sup>10</sup> | 3.259 |
| H17  | H21B <sup>10</sup> | 3.146 | H17  | H21C <sup>4</sup>  | 3.354 |
| H19  | C11 <sup>7</sup>   | 3.335 | H19  | C12 <sup>7</sup>   | 3.16  |
| H19  | C15 <sup>6</sup>   | 3.572 | H19  | H11 <sup>7</sup>   | 3.1   |
| H19  | H12 <sup>7</sup>   | 2.785 | H19  | H21B <sup>7</sup>  | 3.06  |
| H19  | H21C <sup>7</sup>  | 3.471 | H20  | C11 <sup>5</sup>   | 3.425 |
| H20  | H11 <sup>5</sup>   | 2.903 | H21A | O2 <sup>13</sup>   | 2.979 |
| H21A | O3 <sup>6</sup>    | 2.773 | H21A | C10 <sup>10</sup>  | 3.552 |
| H21A | C16 <sup>13</sup>  | 3.574 | H21A | H10 <sup>10</sup>  | 2.808 |
| H21A | H11 <sup>10</sup>  | 3.29  | H21A | H16 <sup>13</sup>  | 2.851 |
| H21A | H17 <sup>10</sup>  | 3.259 | H21B | H12 <sup>7</sup>   | 3.587 |
| H21B | H17 <sup>10</sup>  | 3.146 | H21B | H19 <sup>11</sup>  | 3.06  |
| H21C | O3 <sup>6</sup>    | 3.453 | H21C | C16 <sup>13</sup>  | 3.01  |
| H21C | C17 <sup>13</sup>  | 3.458 | H21C | H11 <sup>7</sup>   | 3.111 |
| H21C | H12 <sup>7</sup>   | 3.273 | H21C | H16 <sup>13</sup>  | 2.535 |
| H21C | H17 <sup>13</sup>  | 3.354 | H21C | H19 <sup>11</sup>  | 3.471 |
| H23  | H1A <sup>2</sup>   | 3.555 | H23  | H1B <sup>8</sup>   | 2.774 |

|     |                   |       |     |                   |       |
|-----|-------------------|-------|-----|-------------------|-------|
| H23 | H27 <sup>2</sup>  | 3.202 | H24 | N2 <sup>8</sup>   | 3.157 |
| H24 | C1 <sup>8</sup>   | 3.394 | H24 | C3 <sup>8</sup>   | 3.461 |
| H24 | C5 <sup>8</sup>   | 3.534 | H24 | C26 <sup>2</sup>  | 3.249 |
| H24 | C27 <sup>2</sup>  | 3.223 | H24 | H1B <sup>8</sup>  | 2.57  |
| H24 | H3B <sup>8</sup>  | 2.662 | H24 | H13 <sup>15</sup> | 3.079 |
| H24 | H14 <sup>8</sup>  | 3.462 | H24 | H26 <sup>2</sup>  | 2.983 |
| H24 | H27 <sup>2</sup>  | 2.936 | H25 | C8 <sup>14</sup>  | 3.433 |
| H25 | C13 <sup>15</sup> | 2.967 | H25 | C14 <sup>15</sup> | 3.236 |
| H25 | H3B <sup>8</sup>  | 3.379 | H25 | H8A <sup>14</sup> | 3.56  |
| H25 | H8B <sup>14</sup> | 2.551 | H25 | H13 <sup>15</sup> | 2.693 |
| H25 | H14 <sup>15</sup> | 3.161 | H25 | H14 <sup>8</sup>  | 3.189 |
| H26 | N2 <sup>14</sup>  | 3.083 | H26 | C8 <sup>14</sup>  | 3.421 |
| H26 | H8B <sup>14</sup> | 2.57  | H26 | H24 <sup>1</sup>  | 2.983 |
| H26 | H26 <sup>16</sup> | 3.081 | H26 | H27 <sup>16</sup> | 3.345 |
| H27 | N2 <sup>2</sup>   | 3.286 | H27 | C7 <sup>2</sup>   | 3.274 |
| H27 | C8 <sup>2</sup>   | 3.35  | H27 | C23 <sup>1</sup>  | 3.27  |
| H27 | C24 <sup>1</sup>  | 3.123 | H27 | H1A <sup>2</sup>  | 3.517 |
| H27 | H8B <sup>2</sup>  | 3.154 | H27 | H8C <sup>2</sup>  | 3.111 |
| H27 | H23 <sup>1</sup>  | 3.202 | H27 | H24 <sup>1</sup>  | 2.936 |
| H27 | H26 <sup>16</sup> | 3.345 |     |                   |       |

### Symmetry Operators

- |                            |                            |
|----------------------------|----------------------------|
| (1) X,-Y+1,Z               | (2) X,-Y+1,Z+1             |
| (3) X,Y,Z+1                | (4) -X+1,Y+1/2,-Z+1/2+1    |
| (5) X,Y,Z-1                | (6) -X+1,-Y,-Z+1           |
| (7) X,-Y,Z                 | (8) -X+2,-Y,-Z+2           |
| (9) -X+2,Y+1/2-1,-Z+1/2+1  | (10) -X+1,-Y,-Z+2          |
| (11) X,-Y,Z+1              | (12) -X+2,Y+1/2-1,-Z+1/2+2 |
| (13) -X+1,Y+1/2-1,-Z+1/2+1 | (14) -X+2,Y+1/2,-Z+1/2+1   |
| (15) -X+2,Y+1/2,-Z+1/2+2   | (16) -X+2,-Y+1,-Z+2        |
